# Supplementary material for: Discovering the Mechanisms of Oleodaphnone as a Potential HIV Latency-Reversing Agent by Transcriptome Profiling
Source: MDPI journal article supplement (doi:10.3390/ijms24087357), 2023-04-16

## Supplementary Materials for

Discovering the mechanisms of oleodaphnone as a potential HIV latency-reversing agent by transcriptome profiling

### Content

S1. Supporting methods: In vitro cytotoxicity assay.

Figure S1. HRESIMS spectrum of **1**.

Figure S2.  $^1\text{H}$ -NMR spectrum of **1**.

Figure S3.  $^{13}\text{C}$ -NMR spectrum of **1**.

Figure S4. HSQC spectrum of **1**.

Figure S5.  $^1\text{H}$ - $^1\text{H}$  COSY spectrum of **1**.

Figure S6. HMBC spectrum of **1**.

Figure S7. ROESY spectrum of **1**.

Figure S8.  $^1\text{H}$ -NMR spectrum of **2**.

Figure S9.  $^{13}\text{C}$ -NMR spectrum of **2**.

Figure S10.  $^1\text{H}$ -NMR spectrum of **3**.

Figure S11.  $^{13}\text{C}$ -NMR spectrum of **3**.

Figure S12.  $^1\text{H}$ -NMR spectrum of **4**.

Figure S13.  $^{13}\text{C}$ -NMR spectrum of **4**.

## S1. Supporting methods: In vitro cytotoxicity assay

The Cell Counting Kit-8 (CCK-8) (Dojindo, Kumamoto, Japan) was used to measure the in vitro cytotoxicity of the compound. Briefly, approximately  $4 \times 10^4$  cells per well were treated with Wikstroelide E or prostratin for 24 h, and then 10  $\mu$ l of CCK-8 solution was added to each well of the 96-well culture plates. After 4 h of incubation at 37°C, the absorbance at 450 nm was measured using a microplate reader. The 50% cytotoxic concentration (CC50) was calculated by nonlinear regression analysis using GraphPad Prism 5 software (GraphPad, San Diego, CA).

Figure S1. HRESIMS spectrum of 1.

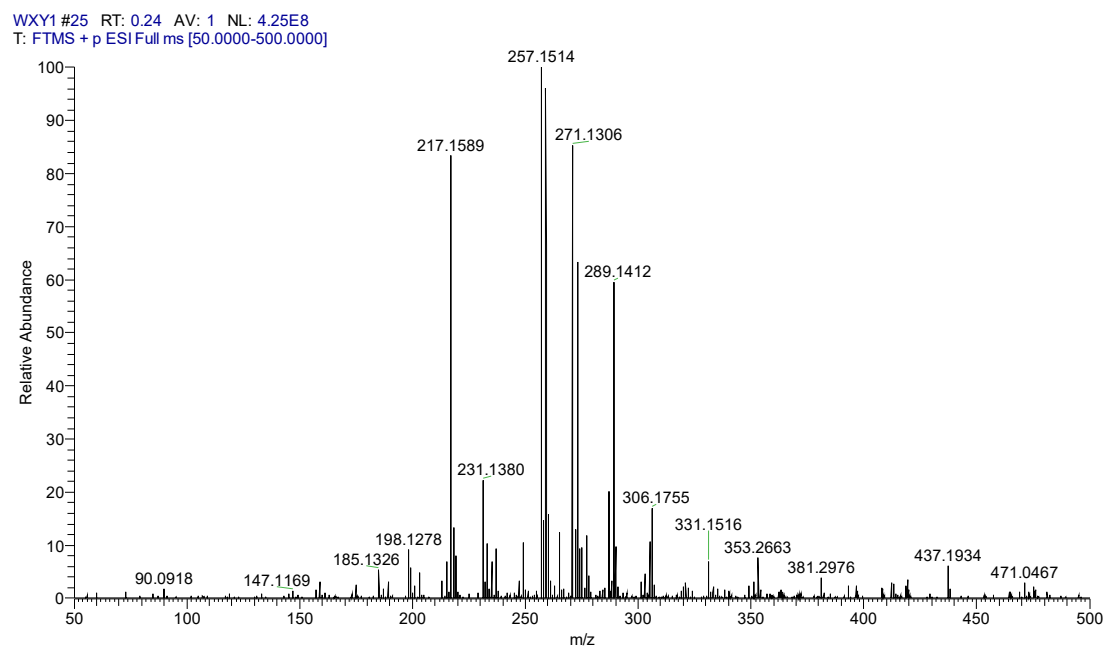

Figure S2.  $^1\text{H}$ -NMR spectrum of **1**.

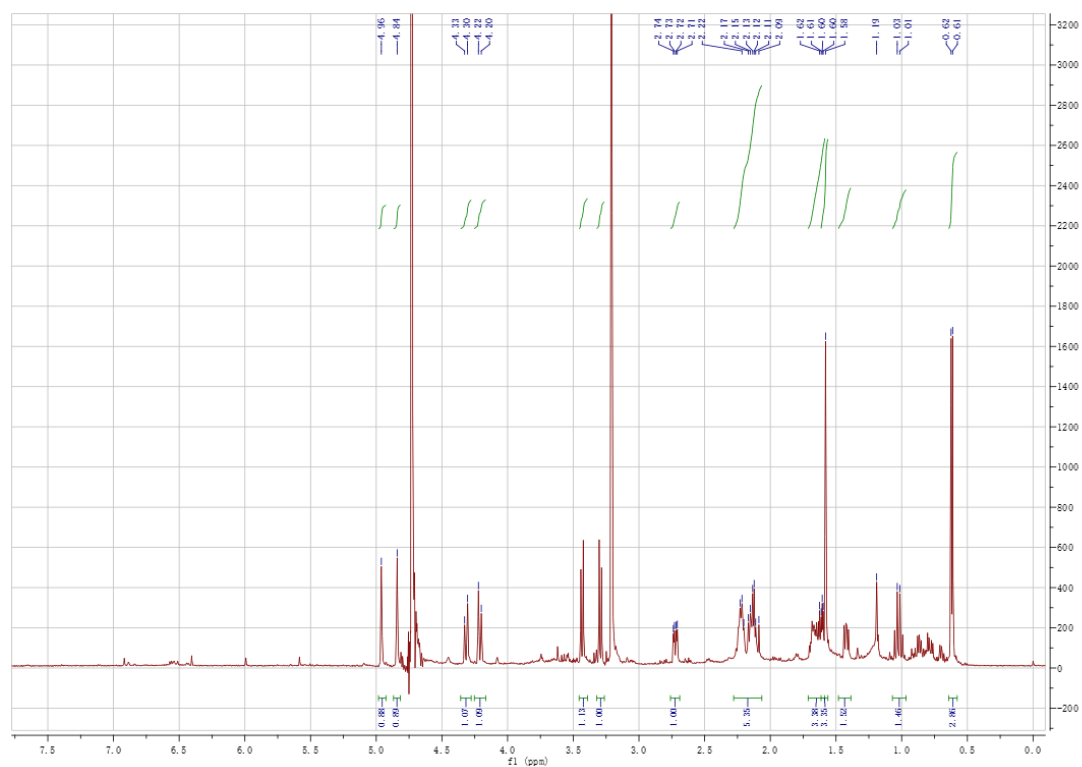

Figure S3.  $^{13}\text{C}$ -NMR spectrum of **1**.

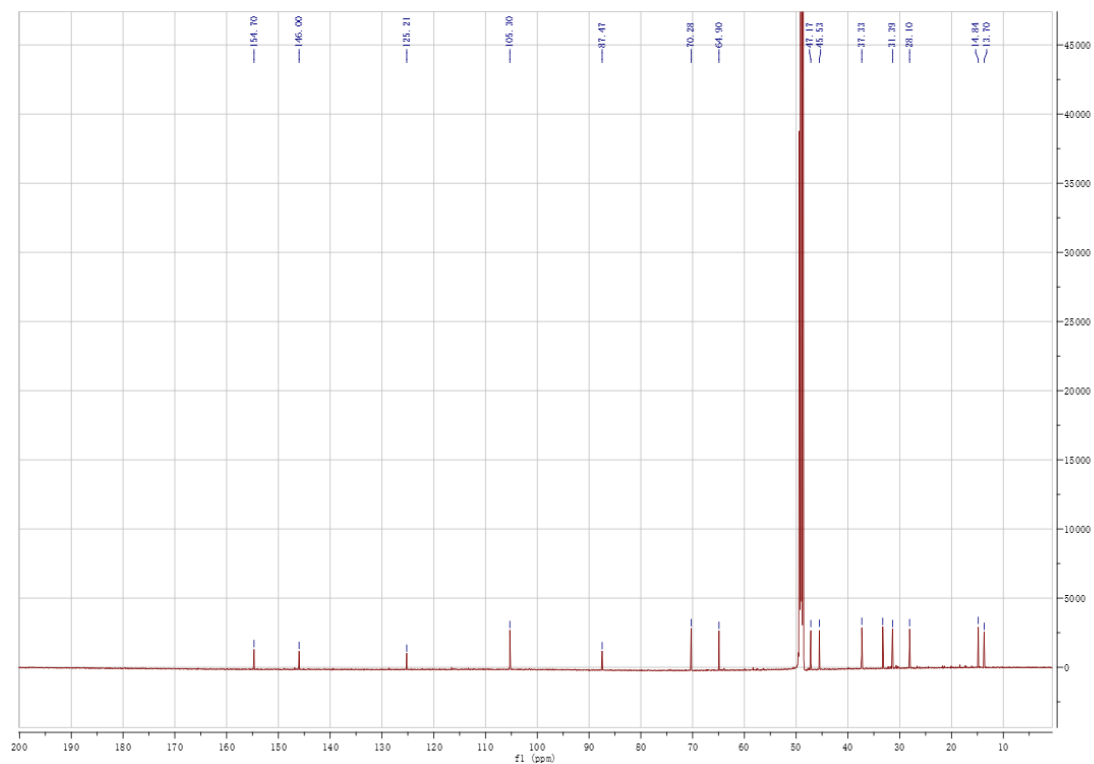

Figure S4. HSQC spectrum of **1**.

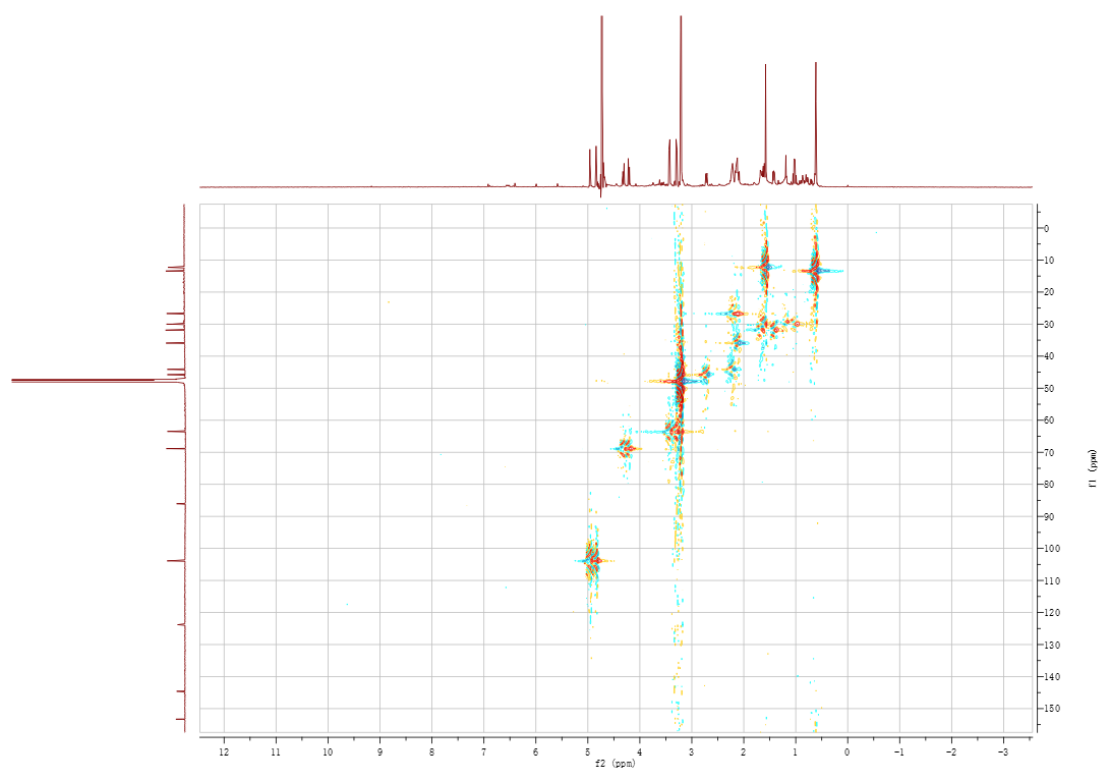

Figure S5.  $^1\text{H}$ - $^1\text{H}$  COSY spectrum of **1**.

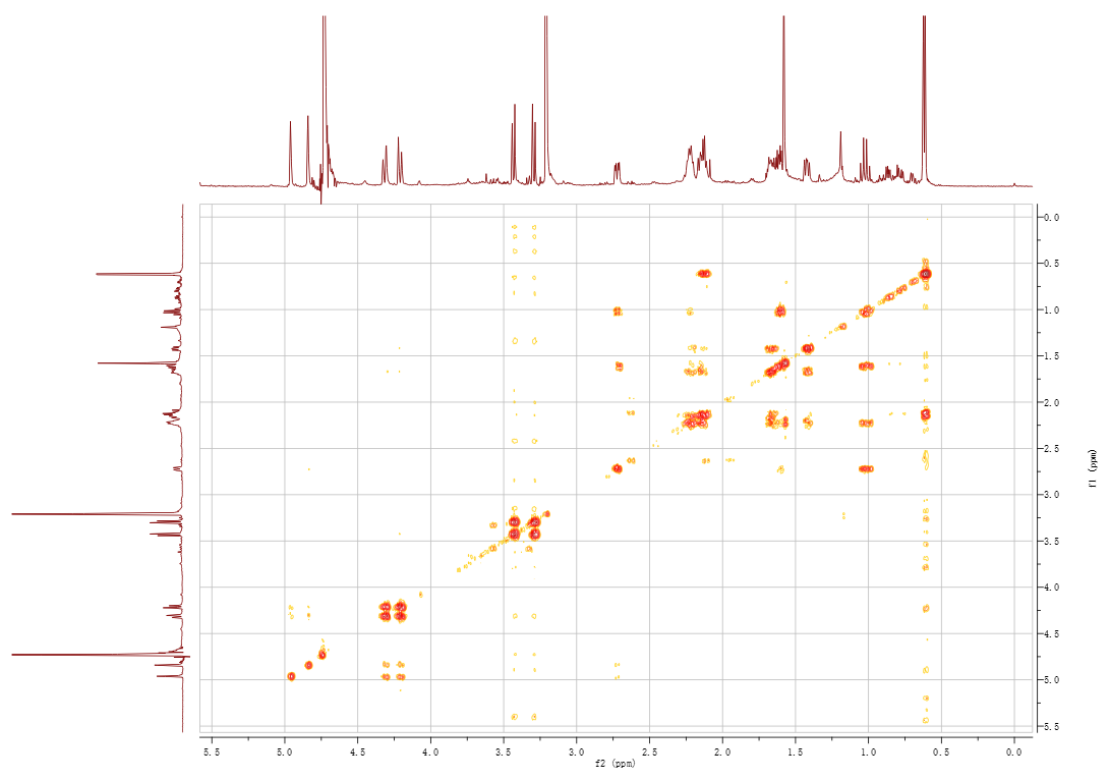

Figure S6. HMBC spectrum of **1**.

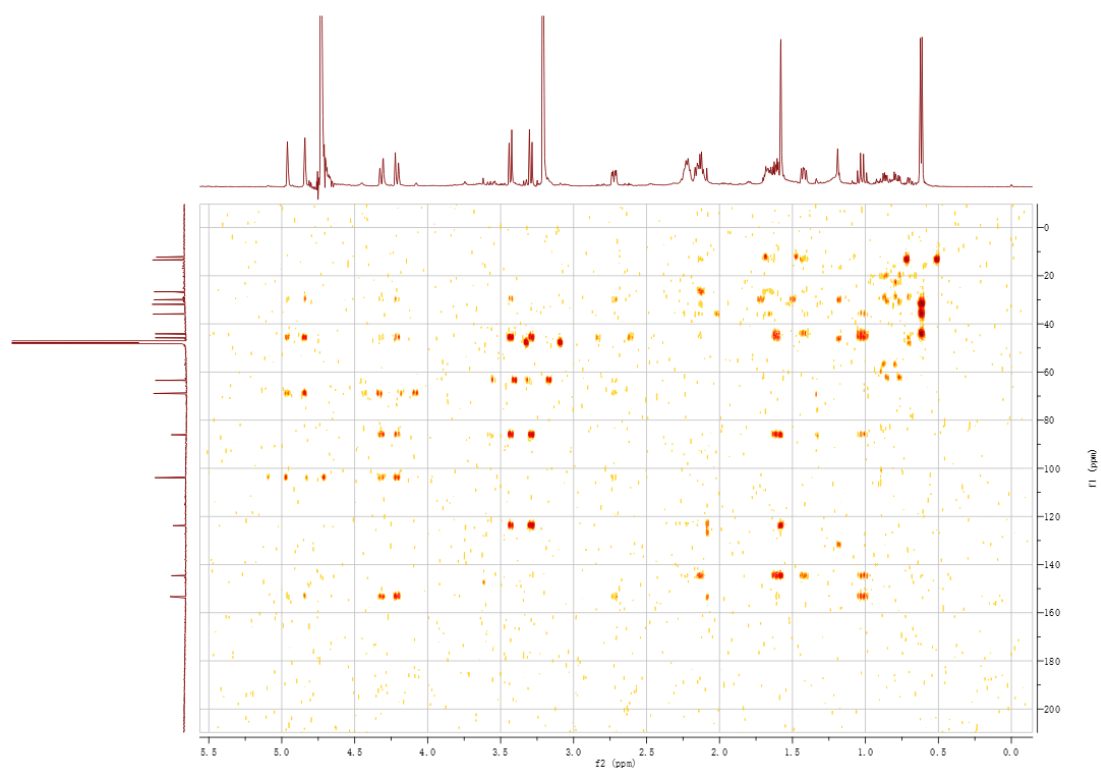

Figure S7. ROESY spectrum of **1**.

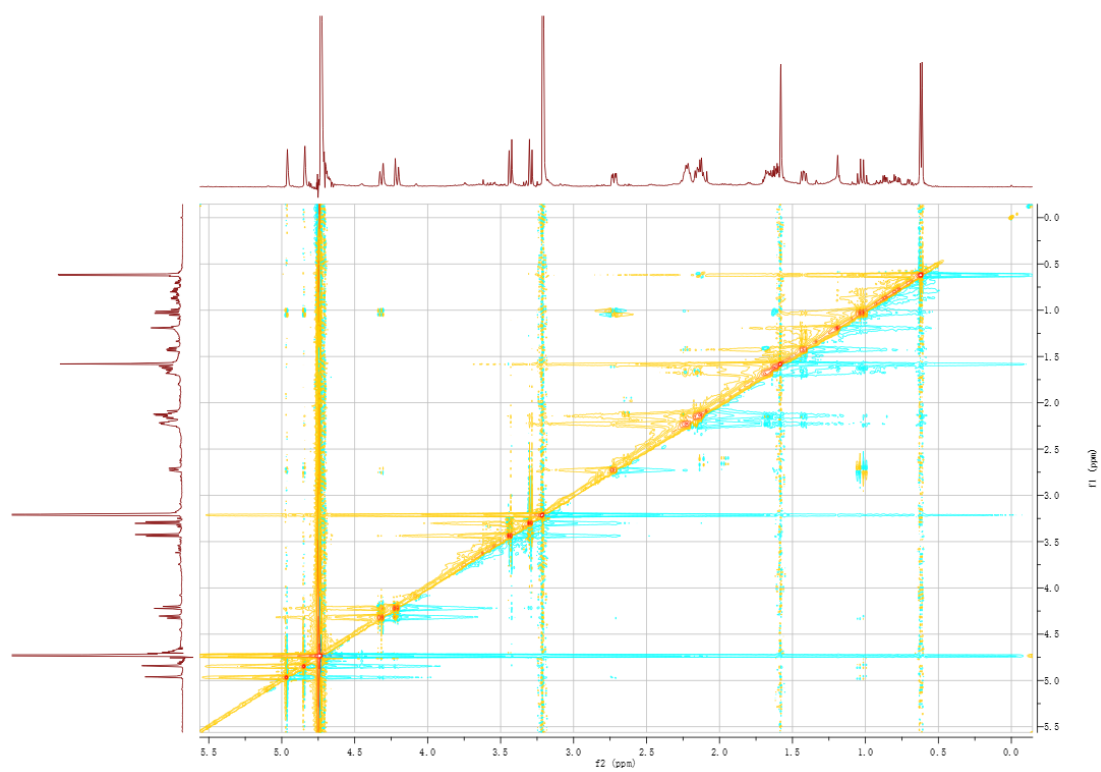

Figure S8.  $^1\text{H}$ -NMR spectrum of **2**.

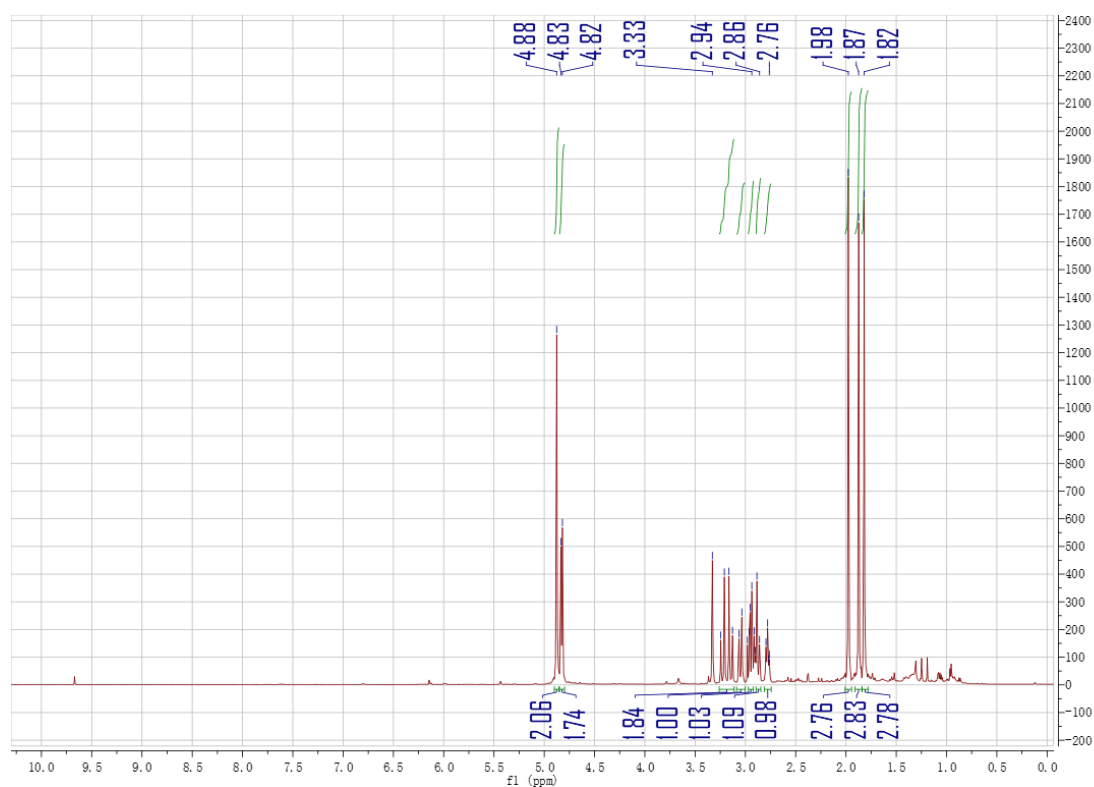

Figure S9.  $^{13}\text{C}$ -NMR spectrum of **2**.

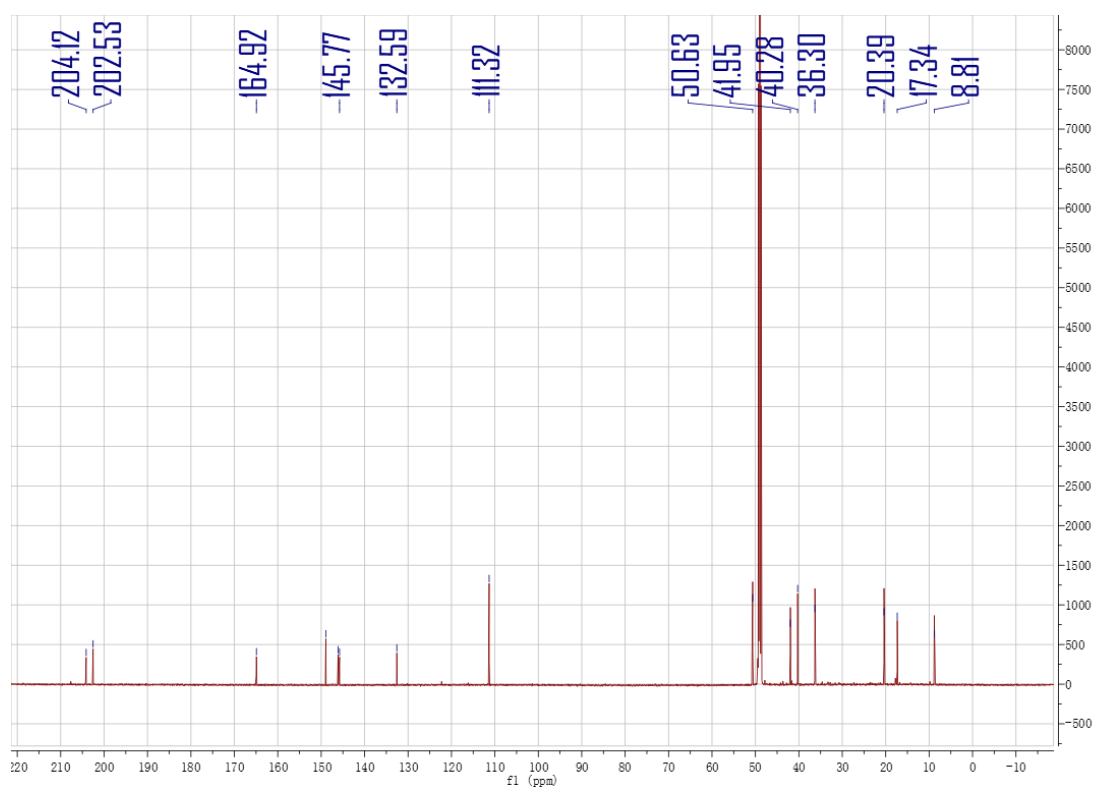

Figure S10.  $^1\text{H}$ -NMR spectrum of **3**.

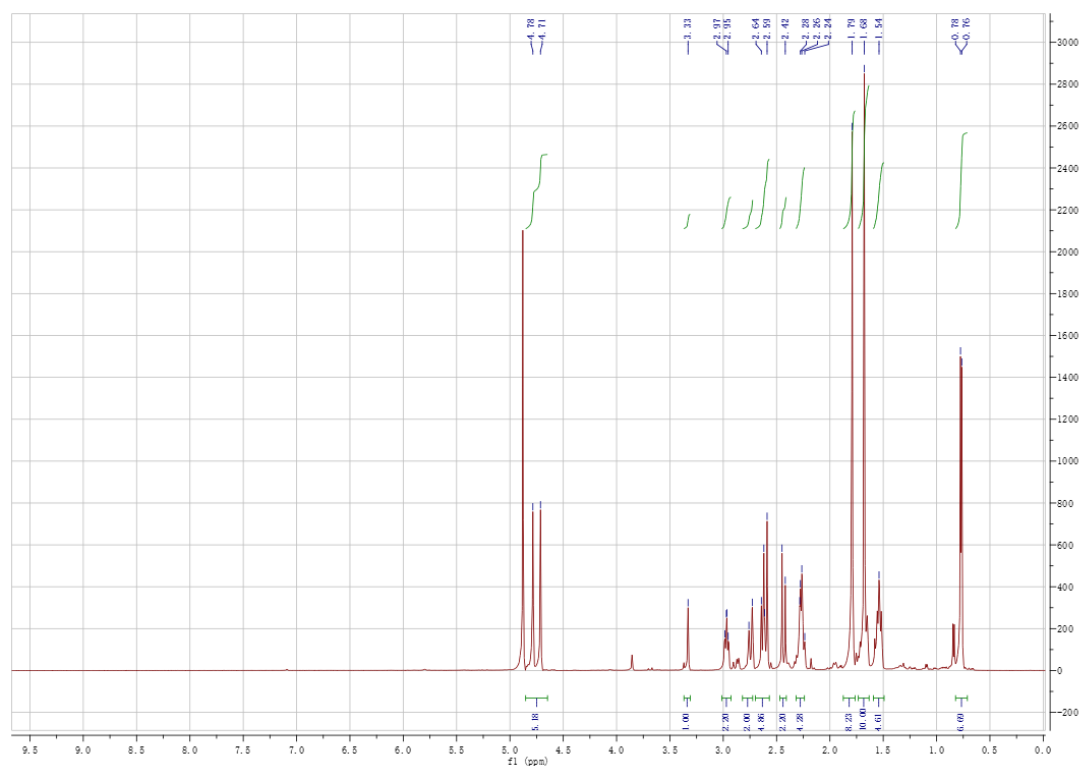

Figure S11.  $^{13}\text{C}$ -NMR spectrum of **3**.

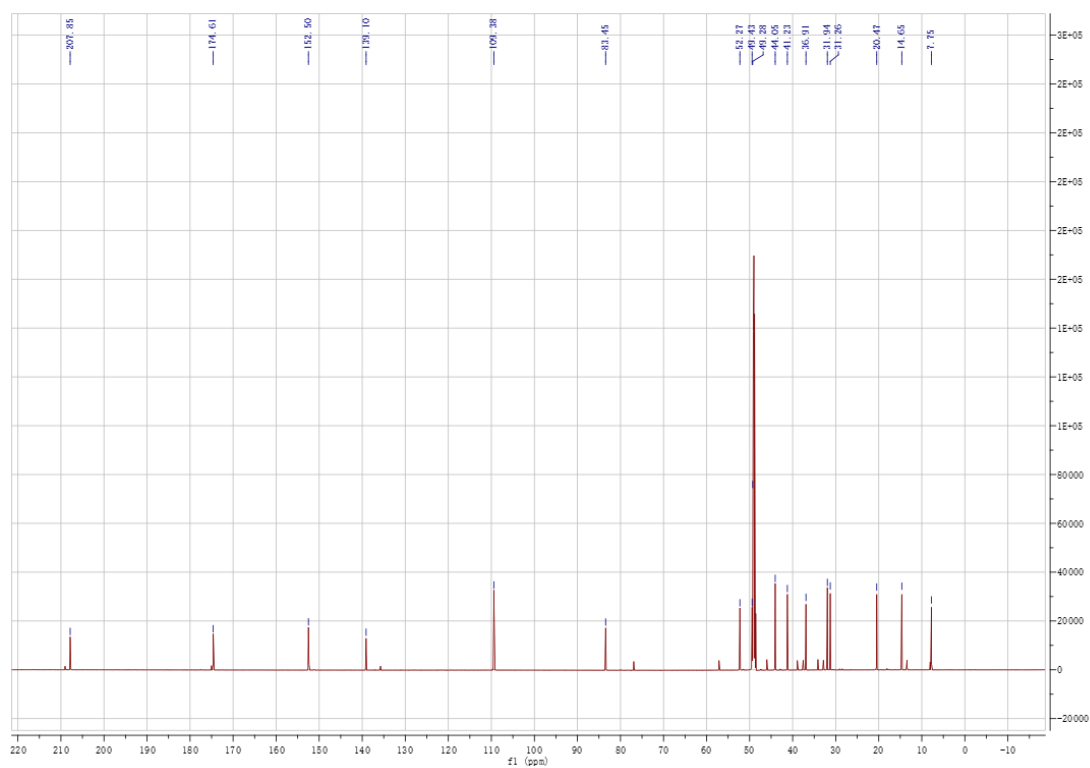

Figure S12.  $^1\text{H}$ -NMR spectrum of **4**.

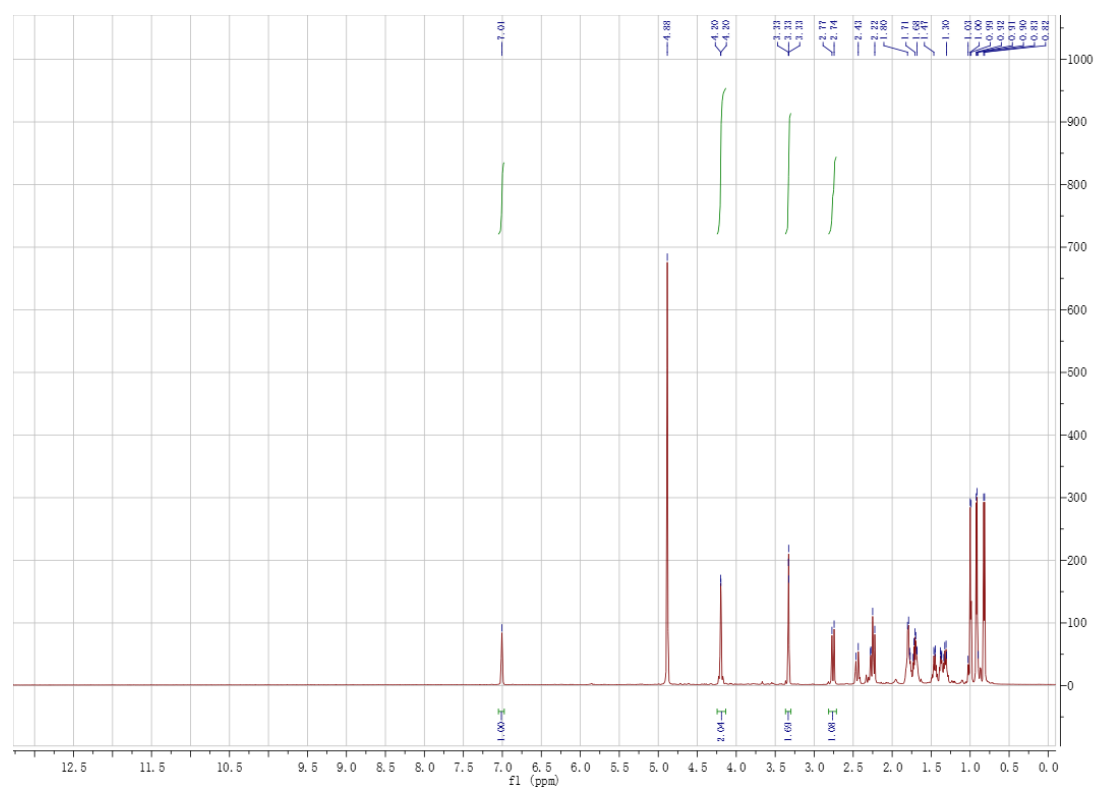

Figure S13.  $^{13}\text{C}$ -NMR spectrum of **4**.

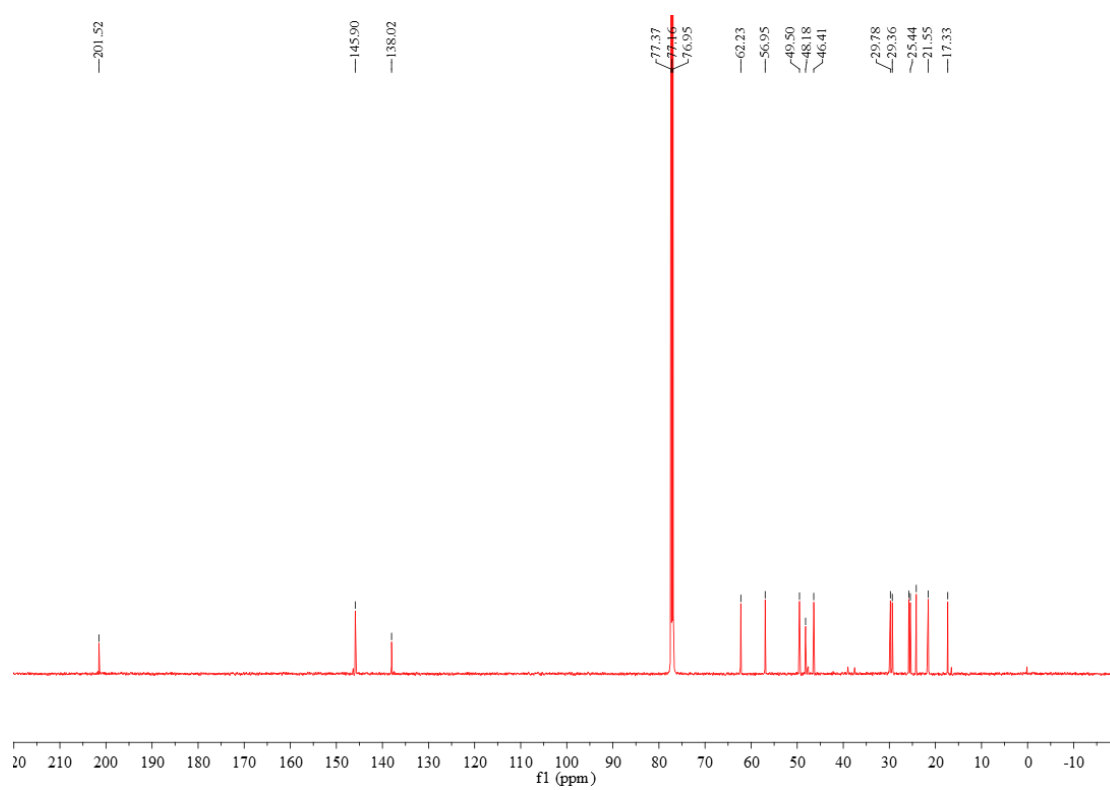

Supplement: s1 [file s1]
