# Supplementary material for: Discovering the Mechanisms of Oleodaphnone as a Potential HIV Latency-Reversing Agent by Transcriptome Profiling
Source: MDPI journal article supplement (doi:10.3390/ijms24087357), 2023-04-16
Supplement: s1 [file Table S1 DEGs-review.xlsx]

## Sheet: 0h_vs_3h.DESeq.Up
ID	Chromosome	Start Site	End Site	Direction	Length	Name	GO	KEGG	EC	eggNOG Class	eggNOG	Description	NCBI	UniProtID
ENSG00000163874	1	37474552	37484379	+	3121	ZC3H12A	GO:0000294;GO:0000294;GO:0000932;GO:0001525;GO:0001933;GO:0001933;GO:0002230;GO:0002376;GO:0002757;GO:0003677;GO:0003682;GO:0003723;GO:0003729;GO:0003730;GO:0003730;GO:0004518;GO:0004518;GO:0004519;GO:0004521;GO:0004521;GO:0004532;GO:0004532;GO:0004540;GO:0004843;GO:0005515;GO:0005515;GO:0005634;GO:0005634;GO:0005654;GO:0005737;GO:0005737;GO:0005737;GO:0005783;GO:0005791;GO:0005791;GO:0005856;GO:…	K18668	EC:3.1.-.-	NOG259385	-	zinc finger CCCH-type containing 12A [Source:HGNCSymbol;Acc:HGNC:26259]	80149	Q5D1E8
ENSG00000075426	2	28392448	28417312	+	7157	FOSL2	GO:0000977;GO:0000978;GO:0000981;GO:0001228;GO:0003677;GO:0003677;GO:0003700;GO:0003700;GO:0005515;GO:0005634;GO:0005634;GO:0005634;GO:0005654;GO:0006355;GO:0006357;GO:0006357;GO:0008219;GO:0045944;GO:0000977;GO:0000977;GO:0000978;GO:0000981;GO:0001228;GO:0003334;GO:0003677;GO:0003677;GO:0003682;GO:0003700;GO:0003700;GO:0005515;GO:0005634;GO:0005634;GO:0005634;GO:0005634;GO:0005654;GO:0006355;GO:…	K09030	-	NOG301361	-	FOS like 2, AP-1 transcription factor subunit[Source:HGNC Symbol;Acc:HGNC:3798]	2355	P15408;Q9H5M2
ENSG00000116016	2	46293667	46386703	+	7302	EPAS1	GO:0003700;GO:0005634;GO:0005634;GO:0005667;GO:0005737;GO:0006355;GO:0046983;GO:0000981;GO:0000981;GO:0001228;GO:0001525;GO:0001525;GO:0001666;GO:0001666;GO:0001892;GO:0001974;GO:0002027;GO:0003677;GO:0003677;GO:0003677;GO:0003700;GO:0003700;GO:0005515;GO:0005515;GO:0005515;GO:0005634;GO:0005634;GO:0005634;GO:0005634;GO:0005654;GO:0005667;GO:0005667;GO:0005667;GO:0005737;GO:0005737;GO:0005829;GO:…	K09095	-	NOG289264	-	endothelial PAS domain protein 1 [Source:HGNCSymbol;Acc:HGNC:3374]	2034	Q99814;B3KW07
ENSG00000170485	2	100820152	100996829	+	12491	NPAS2	GO:0000980;GO:0000981;GO:0003677;GO:0003677;GO:0003700;GO:0003700;GO:0005515;GO:0005634;GO:0005634;GO:0005654;GO:0005654;GO:0005667;GO:0005667;GO:0005737;GO:0005829;GO:0005829;GO:0006355;GO:0006974;GO:0007417;GO:0007623;GO:0019216;GO:0032922;GO:0045739;GO:0045893;GO:0045944;GO:0046872;GO:0046983;GO:0048511;GO:0051775;GO:0051879;GO:0060548;GO:2001020;GO:0003700;GO:0005634;GO:0005634;GO:0005667;GO:…	K09026	-	NOG300360	-	neuronal PAS domain protein 2 [Source:HGNCSymbol;Acc:HGNC:7895]	4862	Q99743;A2I2P5
ENSG00000138061	2	38066973	38109902	-	6014	CYP1B1	GO:0001525;GO:0002930;GO:0002930;GO:0004497;GO:0004497;GO:0004497;GO:0004497;GO:0005506;GO:0005739;GO:0005739;GO:0005783;GO:0005789;GO:0005789;GO:0006725;GO:0006805;GO:0006805;GO:0006809;GO:0006809;GO:0007155;GO:0007155;GO:0007601;GO:0008202;GO:0008202;GO:0008210;GO:0008210;GO:0008285;GO:0008285;GO:0008631;GO:0008631;GO:0009404;GO:0009636;GO:0010575;GO:0010575;GO:0016020;GO:0016125;GO:0016491;GO:…	K07410	EC:1.14.14.1	COG2124	Q	cytochrome P450 family 1 subfamily B member 1[Source:HGNC Symbol;Acc:HGNC:2597]	1545	Q16678;Q53TK1
ENSG00000138386	2	190646746	190692766	+	4887	NAB1	GO:0005634;GO:0006355;GO:0005634;GO:0006355;GO:0005634;GO:0006355;GO:0005634;GO:0005634;GO:0005634;GO:0006355;GO:0006355;GO:0006355;GO:0045892;GO:0045892;GO:0001958;GO:0005634;GO:0005634;GO:0005634;GO:0006355;GO:0006355;GO:0006355;GO:0006355;GO:0008134;GO:0014037;GO:0042552;GO:0045682;GO:0045892;GO:0045892;GO:0005634;GO:0006355;GO:0005634;GO:0006355;GO:0005634;GO:0006355;GO:0045892;GO:0005634;GO:…	K22388	-	NOG307377	-	NGFI-A binding protein 1 [Source:HGNCSymbol;Acc:HGNC:7626]	4664	Q13506;A8K8T1
ENSG00000144655	3	39141855	39154562	-	3214	CSRNP1	GO:0000981;GO:0001228;GO:0003674;GO:0003677;GO:0003700;GO:0003700;GO:0005515;GO:0005634;GO:0005634;GO:0006355;GO:0006915;GO:0009791;GO:0043565;GO:0045944;GO:0045944;GO:0048008;GO:0048705;GO:0060021;GO:0060325;GO:0000981;GO:0003674;GO:0003677;GO:0003700;GO:0005515;GO:0005634;GO:0006915;GO:0045944;	K17494	-	NOG150539	S	cysteine and serine rich nuclear protein 1[Source:HGNC Symbol;Acc:HGNC:14300]	64651	Q96S65;A0A024R2N7
ENSG00000244405	3	186046308	186110318	-	5802	ETV5	GO:0000977;GO:0000981;GO:0000981;GO:0001228;GO:0003677;GO:0003677;GO:0003700;GO:0003700;GO:0003700;GO:0005515;GO:0005634;GO:0005634;GO:0005634;GO:0005654;GO:0005886;GO:0006355;GO:0006357;GO:0007274;GO:0007626;GO:0030154;GO:0034599;GO:0043565;GO:0044212;GO:0045666;GO:0045893;GO:0045944;GO:0048133;GO:0050807;GO:0060252;GO:0060762;GO:0071340;GO:0000977;GO:0000981;GO:0000981;GO:0001228;GO:0003677;GO:…	K15593	-	NOG258471	-	ETS variant 5 [Source:HGNC Symbol;Acc:HGNC:3494]	2119	P41161
ENSG00000134107	3	4979116	4985323	+	3837	BHLHE40	GO:0000122;GO:0000977;GO:0000978;GO:0000980;GO:0000981;GO:0000981;GO:0000981;GO:0001102;GO:0001102;GO:0001227;GO:0001227;GO:0001227;GO:0001756;GO:0003677;GO:0003677;GO:0003677;GO:0003700;GO:0003714;GO:0003714;GO:0003714;GO:0005515;GO:0005515;GO:0005634;GO:0005634;GO:0005634;GO:0005634;GO:0005737;GO:0006355;GO:0006355;GO:0007219;GO:0007623;GO:0008134;GO:0009416;GO:0016604;GO:0019904;GO:0030154;GO:…	K03729	-	NOG281955	-	basic helix-loop-helix family member e40[Source:HGNC Symbol;Acc:HGNC:1046]	8553	O14503;Q6IB83
ENSG00000109320	4	102501329	102617302	+	6257	NFKB1	GO:0000122;GO:0000122;GO:0000122;GO:0000976;GO:0000977;GO:0000980;GO:0000981;GO:0001227;GO:0001228;GO:0001818;GO:0002223;GO:0003677;GO:0003677;GO:0003677;GO:0003682;GO:0003700;GO:0003700;GO:0005515;GO:0005515;GO:0005515;GO:0005576;GO:0005634;GO:0005634;GO:0005634;GO:0005634;GO:0005634;GO:0005654;GO:0005654;GO:0005737;GO:0005737;GO:0005737;GO:0005739;GO:0005829;GO:0005829;GO:0005829;GO:0006355;GO:…	K02580	-	COG0666	R	nuclear factor kappa B subunit 1 [Source:HGNCSymbol;Acc:HGNC:7794]	4790	P19838;A0A024RDJ4
ENSG00000120738	5	138465490	138469315	+	3138	EGR1	GO:0000122;GO:0000976;GO:0000977;GO:0000977;GO:0000981;GO:0000981;GO:0000981;GO:0001228;GO:0001666;GO:0001666;GO:0002931;GO:0002931;GO:0003676;GO:0003677;GO:0003677;GO:0003700;GO:0003700;GO:0005515;GO:0005515;GO:0005634;GO:0005634;GO:0005634;GO:0005634;GO:0005654;GO:0005654;GO:0005737;GO:0005737;GO:0006355;GO:0006357;GO:0006366;GO:0008270;GO:0009749;GO:0010385;GO:0010628;GO:0030217;GO:0030509;GO:…	K09203	-	COG5048	R	early growth response 1 [Source:HGNCSymbol;Acc:HGNC:3238]	1958	P18146;Q546S1
ENSG00000153162	6	7726797	7881422	+	2780	BMP6	GO:0000122;GO:0000122;GO:0001501;GO:0001503;GO:0001503;GO:0001649;GO:0001649;GO:0001654;GO:0001822;GO:0001938;GO:0001958;GO:0003323;GO:0005125;GO:0005125;GO:0005160;GO:0005576;GO:0005615;GO:0005615;GO:0005615;GO:0005737;GO:0006879;GO:0006879;GO:0006954;GO:0006955;GO:0007275;GO:0008083;GO:0008083;GO:0008083;GO:0008284;GO:0010039;GO:0010469;GO:0010862;GO:0010862;GO:0010862;GO:0010862;GO:0014823;GO:…	K16620	-	NOG272883	-	bone morphogenetic protein 6 [Source:HGNCSymbol;Acc:HGNC:1073]	654	P22004;Q4VBA3;B4DUF7
ENSG00000232810	6	31575567	31578336	+	1676	TNF	GO:0000060;GO:0000122;GO:0000122;GO:0000122;GO:0000165;GO:0000185;GO:0000187;GO:0000977;GO:0001774;GO:0001819;GO:0001891;GO:0001891;GO:0001932;GO:0001934;GO:0001934;GO:0001937;GO:0002020;GO:0002020;GO:0002439;GO:0002740;GO:0002876;GO:0002925;GO:0005125;GO:0005125;GO:0005125;GO:0005164;GO:0005164;GO:0005164;GO:0005164;GO:0005515;GO:0005515;GO:0005576;GO:0005576;GO:0005615;GO:0005615;GO:0005615;GO:…	K03156	-	NOG40413	-	tumor necrosis factor [Source:HGNCSymbol;Acc:HGNC:11892]	7124	P01375;Q5STB3
ENSG00000057657	6	106086320	106109939	+	6392	PRDM1	GO:0000122;GO:0000122;GO:0000977;GO:0000978;GO:0000981;GO:0001227;GO:0001227;GO:0002250;GO:0002376;GO:0003676;GO:0003677;GO:0003700;GO:0003700;GO:0005515;GO:0005634;GO:0005634;GO:0005654;GO:0005737;GO:0005737;GO:0008168;GO:0016740;GO:0031490;GO:0032259;GO:0032823;GO:0033082;GO:0042826;GO:0043565;GO:0045087;GO:0045165;GO:0046872;GO:0051136;GO:1990841;GO:0000122;GO:0000122;GO:0000122;GO:0000977;GO:…	-	-	COG5048	R	PR/SET domain 1 [Source:HGNC Symbol;Acc:HGNC:9346]	639	O75626
ENSG00000118503	6	137867188	137883312	+	5051	TNFAIP3	GO:0001922;GO:0001922;GO:0002020;GO:0002237;GO:0002237;GO:0002634;GO:0002634;GO:0002677;GO:0003677;GO:0003677;GO:0003824;GO:0004842;GO:0004843;GO:0004843;GO:0004843;GO:0005515;GO:0005515;GO:0005515;GO:0005634;GO:0005634;GO:0005634;GO:0005737;GO:0005737;GO:0005737;GO:0005764;GO:0005829;GO:0006508;GO:0006915;GO:0006954;GO:0007010;GO:0008152;GO:0008233;GO:0008234;GO:0008270;GO:0010803;GO:0016477;GO:…	K11859	EC:3.4.19.12	NOG248343	-	TNF alpha induced protein 3 [Source:HGNCSymbol;Acc:HGNC:11896]	7128	P21580
ENSG00000118515	6	134169246	134318112	-	9992	SGK1	GO:0000166;GO:0001558;GO:0004672;GO:0004672;GO:0004674;GO:0004674;GO:0004674;GO:0004674;GO:0004674;GO:0004712;GO:0005246;GO:0005515;GO:0005515;GO:0005524;GO:0005524;GO:0005634;GO:0005634;GO:0005737;GO:0005737;GO:0005739;GO:0005783;GO:0005789;GO:0005829;GO:0005829;GO:0005886;GO:0006468;GO:0006468;GO:0006468;GO:0006814;GO:0006915;GO:0006974;GO:0007616;GO:0008217;GO:0015459;GO:0015459;GO:0016020;GO:…	K13302	EC:2.7.11.1	COG0515	T	serum/glucocorticoid regulated kinase 1[Source:HGNC Symbol;Acc:HGNC:10810]	6446	O00141
ENSG00000124762	6	36676460	36687339	+	3050	CDKN1A	GO:0000079;GO:0000082;GO:0000082;GO:0000086;GO:0000307;GO:0004693;GO:0004860;GO:0004860;GO:0004861;GO:0004861;GO:0004861;GO:0004861;GO:0005515;GO:0005515;GO:0005634;GO:0005634;GO:0005634;GO:0005654;GO:0005654;GO:0005654;GO:0005730;GO:0005737;GO:0005829;GO:0006357;GO:0006367;GO:0006974;GO:0006977;GO:0006977;GO:0007049;GO:0007050;GO:0007050;GO:0007050;GO:0007265;GO:0007346;GO:0007507;GO:0008285;GO:…	K06625	-	NOG290902	-	cyclin dependent kinase inhibitor 1A [Source:HGNCSymbol;Acc:HGNC:1784]	1026	P38936;A0A024RCX5
ENSG00000146232	6	44258166	44265788	-	2581	NFKBIE	GO:0001650;GO:0005634;GO:0005829;GO:0001650;GO:0005515;GO:0005634;GO:0005737;GO:0005737;GO:0005794;GO:0005829;GO:0005829;GO:0042942;GO:0042994;GO:0048471;	K05872	-	COG0666	R	NFKB inhibitor epsilon [Source:HGNCSymbol;Acc:HGNC:7799]	4794	O00221;Q96F31;A0A024RD24
ENSG00000146592	7	28299321	28825894	+	11674	CREB5	GO:0000981;GO:0003676;GO:0003677;GO:0003700;GO:0003700;GO:0005515;GO:0005634;GO:0006355;GO:0006357;GO:0006366;GO:0045893;GO:0046872;GO:0070062;GO:0003676;GO:0000981;GO:0003676;GO:0003677;GO:0003700;GO:0003700;GO:0005515;GO:0005634;GO:0006355;GO:0006357;GO:0006366;GO:0045893;GO:0046872;GO:0070062;GO:0000981;GO:0003676;GO:0003677;GO:0003700;GO:0003700;GO:0005515;GO:0005634;GO:0006355;GO:0006357;GO:…	K09047	-	NOG286140	-	cAMP responsive element binding protein 5[Source:HGNC Symbol;Acc:HGNC:16844]	9586	Q02930
ENSG00000155090	8	102648779	102655902	-	4003	KLF10	GO:0000122;GO:0000978;GO:0000981;GO:0000981;GO:0001046;GO:0001046;GO:0001228;GO:0001501;GO:0003676;GO:0003677;GO:0003700;GO:0005515;GO:0005634;GO:0005634;GO:0005634;GO:0005634;GO:0005634;GO:0006355;GO:0006357;GO:0007179;GO:0007267;GO:0007623;GO:0008283;GO:0008285;GO:0009267;GO:0009267;GO:0030282;GO:0035019;GO:0042752;GO:0042752;GO:0045672;GO:0045892;GO:0045892;GO:0045944;GO:0046872;GO:0048511;GO:…	K09209	-	COG5048	R	Kruppel like factor 10 [Source:HGNCSymbol;Acc:HGNC:11810]	7071	Q13118
ENSG00000179388	8	22687659	22693302	-	4855	EGR3	GO:0000977;GO:0000981;GO:0000981;GO:0001938;GO:0002042;GO:0003676;GO:0003677;GO:0003700;GO:0005634;GO:0005634;GO:0006357;GO:0007274;GO:0007422;GO:0007517;GO:0007623;GO:0033089;GO:0035767;GO:0035924;GO:0043066;GO:0043565;GO:0044344;GO:0045586;GO:0045944;GO:0045944;GO:0046872;GO:0071363;GO:0000977;GO:0000981;GO:0000981;GO:0001938;GO:0002042;GO:0003676;GO:0003677;GO:0003700;GO:0005634;GO:0005634;GO:…	K12497	-	COG5048	R	early growth response 3 [Source:HGNCSymbol;Acc:HGNC:3240]	1960	Q06889
ENSG00000173334	8	125430321	125438405	+	4138	TRIB1	GO:0004860;GO:0004860;GO:0005515;GO:0005634;GO:0005634;GO:0005737;GO:0006469;GO:0007254;GO:0008134;GO:0008134;GO:0014912;GO:0031434;GO:0031434;GO:0031625;GO:0031625;GO:0031665;GO:0032436;GO:0032436;GO:0032436;GO:0032496;GO:0032496;GO:0043405;GO:0043405;GO:0043433;GO:0043433;GO:0045645;GO:0045651;GO:0045659;GO:0048662;GO:0055106;GO:0055106;GO:0004860;GO:0004860;GO:0005515;GO:0005634;GO:0005634;GO:…	K08814	-	COG0515	T	tribbles pseudokinase 1 [Source:HGNCSymbol;Acc:HGNC:16891]	10221	Q96RU8
ENSG00000119508	9	99821855	99866891	+	6314	NR4A3	GO:0000122;GO:0000977;GO:0000978;GO:0000981;GO:0001228;GO:0001228;GO:0003677;GO:0003677;GO:0003700;GO:0003707;GO:0003707;GO:0004879;GO:0004879;GO:0005515;GO:0005515;GO:0005634;GO:0005634;GO:0005634;GO:0005654;GO:0005667;GO:0006355;GO:0006367;GO:0007369;GO:0008270;GO:0009444;GO:0010613;GO:0010828;GO:0019901;GO:0030522;GO:0032765;GO:0035259;GO:0035497;GO:0035726;GO:0038097;GO:0042629;GO:0042803;GO:…	K08559	-	NOG245120	-	nuclear receptor subfamily 4 group A member 3[Source:HGNC Symbol;Acc:HGNC:7982]	8013	Q92570;A0A024R168
ENSG00000056558	9	120902393	120929173	-	6449	TRAF1	GO:0005164;GO:0005164;GO:0005164;GO:0005515;GO:0005515;GO:0005737;GO:0005829;GO:0006915;GO:0007165;GO:0008270;GO:0010803;GO:0031625;GO:0031625;GO:0031996;GO:0031996;GO:0032991;GO:0042802;GO:0042981;GO:0051092;GO:0065003;GO:2001236;GO:0005164;GO:0005164;GO:0005164;GO:0005515;GO:0005515;GO:0005737;GO:0005829;GO:0006915;GO:0007165;GO:0008270;GO:0010803;GO:0031625;GO:0031625;GO:0031996;GO:0031996;GO:…	K03172	-	NOG264247	-	TNF receptor associated factor 1 [Source:HGNCSymbol;Acc:HGNC:12031]	7185	Q13077
ENSG00000077150	10	102394110	102402529	+	4484	NFKB2	GO:0000978;GO:0000981;GO:0001228;GO:0003677;GO:0003677;GO:0003700;GO:0003700;GO:0003713;GO:0005515;GO:0005515;GO:0005634;GO:0005634;GO:0005654;GO:0005737;GO:0005737;GO:0005829;GO:0005829;GO:0006355;GO:0006355;GO:0007165;GO:0032481;GO:0033257;GO:0038061;GO:0045944;GO:0048511;GO:0051092;GO:0000978;GO:0000981;GO:0001228;GO:0002268;GO:0002467;GO:0003677;GO:0003677;GO:0003700;GO:0003700;GO:0003713;GO:…	K04469	-	COG0666	R	nuclear factor kappa B subunit 2 [Source:HGNCSymbol;Acc:HGNC:7795]	4791	Q00653
ENSG00000122877	10	62811996	62919900	-	3689	EGR2	GO:0000978;GO:0000981;GO:0000981;GO:0001102;GO:0001102;GO:0001228;GO:0003676;GO:0003677;GO:0003677;GO:0003682;GO:0003682;GO:0003700;GO:0003700;GO:0005515;GO:0005634;GO:0005634;GO:0005634;GO:0005634;GO:0005654;GO:0005737;GO:0005737;GO:0006355;GO:0006357;GO:0006366;GO:0006366;GO:0006611;GO:0006611;GO:0007420;GO:0007422;GO:0007611;GO:0007622;GO:0008045;GO:0014037;GO:0016740;GO:0016925;GO:0021569;GO:…	K12496	-	COG5048	R	early growth response 2 [Source:HGNCSymbol;Acc:HGNC:3239]	1959	P11161
ENSG00000198879	10	7158624	7411486	-	9953	SFMBT2	GO:0003714;GO:0005515;GO:0005634;GO:0005634;GO:0006355;GO:0010629;GO:0016235;GO:0016607;GO:0042393;GO:0042393;GO:0043231;GO:1903507;GO:0003714;GO:0005515;GO:0005634;GO:0005634;GO:0006355;GO:0010629;GO:0016235;GO:0016607;GO:0042393;GO:0042393;GO:0043231;GO:1903507;GO:0005634;GO:0006355;GO:0005634;GO:0006355;	-	-	NOG316861	-	Scm like with four mbt domains 2 [Source:HGNCSymbol;Acc:HGNC:20256]	57713	Q5VUG0
ENSG00000175592	11	65892049	65900573	-	1887	FOSL1	GO:0000978;GO:0000978;GO:0000981;GO:0003677;GO:0003677;GO:0003700;GO:0003700;GO:0005515;GO:0005634;GO:0005634;GO:0005634;GO:0005634;GO:0005654;GO:0006355;GO:0006357;GO:0006357;GO:0006366;GO:0006935;GO:0006968;GO:0008284;GO:0009615;GO:0061614;GO:2000144;GO:0000977;GO:0000978;GO:0000978;GO:0000978;GO:0000981;GO:0001228;GO:0001701;GO:0003677;GO:0003677;GO:0003677;GO:0003700;GO:0003700;GO:0005515;GO:…	K04502	-	NOG252534	-	FOS like 1, AP-1 transcription factor subunit[Source:HGNC Symbol;Acc:HGNC:13718]	8061	P15407;A0A0S2Z595
ENSG00000123358	12	52022832	52059507	+	7295	NR4A1	GO:0003677;GO:0004879;GO:0005634;GO:0006355;GO:0030522;GO:0000977;GO:0000978;GO:0000981;GO:0001228;GO:0001228;GO:0001938;GO:0002042;GO:0003677;GO:0003677;GO:0003677;GO:0003677;GO:0003700;GO:0003707;GO:0004879;GO:0004879;GO:0005515;GO:0005634;GO:0005634;GO:0005634;GO:0005634;GO:0005634;GO:0005654;GO:0005667;GO:0005737;GO:0005829;GO:0006355;GO:0006367;GO:0007165;GO:0008270;GO:0030522;GO:0031965;GO:…	K04465	-	NOG245120	-	nuclear receptor subfamily 4 group A member 1[Source:HGNC Symbol;Acc:HGNC:7980]	3164	P22736;A0A024R126
ENSG00000166886	12	57088894	57095476	+	3010	NAB2	GO:0001958;GO:0003714;GO:0005515;GO:0005634;GO:0005634;GO:0005634;GO:0005634;GO:0006355;GO:0006355;GO:0006355;GO:0007399;GO:0008134;GO:0008283;GO:0014037;GO:0016480;GO:0042552;GO:0042802;GO:0045682;GO:0045892;GO:1902949;GO:1902949;GO:0003714;GO:0005515;GO:0005634;GO:0005634;GO:0005634;GO:0006355;GO:0006355;GO:0007399;GO:0008283;GO:0016480;GO:0042802;GO:0045892;GO:1902949;	K22388	-	NOG307377	-	NGFI-A binding protein 2 [Source:HGNCSymbol;Acc:HGNC:7627]	4665	Q15742
ENSG00000129514	14	37589984	37596059	-	3982	FOXA1	GO:0000122;GO:0000981;GO:0000981;GO:0001228;GO:0001228;GO:0001650;GO:0003677;GO:0003677;GO:0003700;GO:0003700;GO:0003700;GO:0005515;GO:0005634;GO:0005634;GO:0005634;GO:0005634;GO:0005654;GO:0005654;GO:0005902;GO:0006325;GO:0006338;GO:0006338;GO:0006355;GO:0006357;GO:0006357;GO:0007219;GO:0007275;GO:0008134;GO:0009653;GO:0010468;GO:0010719;GO:0019904;GO:0021904;GO:0030154;GO:0030324;GO:0032355;GO:…	K09387	-	COG5025	K	forkhead box A1 [Source:HGNC Symbol;Acc:HGNC:5021]	3169	P55317
ENSG00000170345	14	75278774	75282230	+	3238	FOS	GO:0000978;GO:0000978;GO:0000979;GO:0000981;GO:0001102;GO:0001228;GO:0001661;GO:0003677;GO:0003677;GO:0003677;GO:0003677;GO:0003682;GO:0003690;GO:0003700;GO:0003700;GO:0003700;GO:0003700;GO:0003700;GO:0005515;GO:0005634;GO:0005634;GO:0005634;GO:0005634;GO:0005634;GO:0005634;GO:0005634;GO:0005654;GO:0005654;GO:0005667;GO:0005667;GO:0005737;GO:0005783;GO:0005829;GO:0006306;GO:0006355;GO:0006355;GO:…	K04379	-	NOG258795	-	Fos proto-oncogene, AP-1 transcription factorsubunit [Source:HGNC Symbol;Acc:HGNC:3796]	2353	P01100;Q6FG41
ENSG00000104064	15	50275392	50355408	-	5677	GABPB1	GO:0003700;GO:0005515;GO:0005634;GO:0005634;GO:0005634;GO:0005654;GO:0005654;GO:0006357;GO:0007005;GO:0036464;GO:0044212;GO:0045944;GO:0046982;GO:0003700;GO:0005515;GO:0005634;GO:0005634;GO:0005634;GO:0005654;GO:0005654;GO:0006357;GO:0007005;GO:0036464;GO:0044212;GO:0045944;GO:0046982;GO:0005654;GO:0036464;GO:0003700;GO:0005515;GO:0005634;GO:0005634;GO:0005634;GO:0005654;GO:0005654;GO:0006357;GO:…	K09454	-	COG0666	R	GA binding protein transcription factor subunitbeta 1 [Source:HGNC Symbol;Acc:HGNC:4074]	2553	Q06547
ENSG00000034152	17	21284672	21315240	+	3783	MAP2K3	GO:0000165;GO:0000166;GO:0000187;GO:0000187;GO:0000187;GO:0004672;GO:0004674;GO:0004674;GO:0004708;GO:0004708;GO:0004708;GO:0004713;GO:0005515;GO:0005515;GO:0005524;GO:0005524;GO:0005654;GO:0005737;GO:0005829;GO:0006468;GO:0006954;GO:0007165;GO:0016020;GO:0016301;GO:0016310;GO:0016740;GO:0018108;GO:0019901;GO:0019901;GO:0023014;GO:0031098;GO:0032147;GO:0035924;GO:0038066;GO:0042035;GO:0043536;GO:…	K04432	EC:2.7.12.2	COG0515	T	mitogen-activated protein kinase kinase 3[Source:HGNC Symbol;Acc:HGNC:6843]	5606	P46734;Q6FI23
ENSG00000108551	17	17494437	17496395	-	1748	RASD1	GO:0000166;GO:0003924;GO:0003924;GO:0005515;GO:0005525;GO:0005525;GO:0005634;GO:0005634;GO:0005737;GO:0005737;GO:0005886;GO:0007165;GO:0007165;GO:0007186;GO:0007263;GO:0016020;GO:0016020;GO:0016529;GO:0045892;GO:0048471;GO:0048471;GO:0000166;GO:0003924;GO:0003924;GO:0005515;GO:0005525;GO:0005525;GO:0005634;GO:0005737;GO:0005886;GO:0007165;GO:0007165;GO:0007186;GO:0016020;GO:0016020;GO:0048471;	K07843	-	COG1100	R	ras related dexamethasone induced 1 [Source:HGNCSymbol;Acc:HGNC:15828]	51655	Q9Y272
ENSG00000126561	17	42287547	42311943	+	5754	STAT5A	GO:0000981;GO:0001938;GO:0003677;GO:0003677;GO:0003700;GO:0003700;GO:0004713;GO:0005515;GO:0005515;GO:0005634;GO:0005634;GO:0005654;GO:0005654;GO:0005737;GO:0005829;GO:0005829;GO:0006355;GO:0006357;GO:0007165;GO:0007259;GO:0007595;GO:0018108;GO:0019221;GO:0019530;GO:0035723;GO:0038026;GO:0038110;GO:0038111;GO:0038113;GO:0040014;GO:0043536;GO:0060397;GO:0060397;GO:0000981;GO:0001938;GO:0003677;GO:…	K11223	-	NOG245085	-	signal transducer and activator of transcription 5A[Source:HGNC Symbol;Acc:HGNC:11366]	6776	P42229;A0A384N5W4;A8K6I5;Q59GY7
ENSG00000273604	17	38671703	38675421	-	3719	EPOP	GO:0003682;GO:0003682;GO:0005634;GO:0005694;GO:0006357;GO:0006357;GO:0035098;GO:0035098;GO:0035616;GO:0035616;GO:0048663;GO:0048663;GO:0048863;GO:0048863;GO:0070449;GO:0070449;	-	-	-	-	elongin BC and polycomb repressive complex 2associated protein [Source:HGNC Symbol;Acc:HGNC:34493]	100170841	A6NHQ4
ENSG00000069399	19	44747705	44760044	+	3242	BCL3	GO:0000060;GO:0002268;GO:0002315;GO:0002455;GO:0002467;GO:0003677;GO:0003700;GO:0005515;GO:0005515;GO:0005634;GO:0005654;GO:0005737;GO:0005829;GO:0005886;GO:0006351;GO:0006974;GO:0007249;GO:0008134;GO:0009615;GO:0010225;GO:0019730;GO:0030198;GO:0030330;GO:0030496;GO:0030674;GO:0032729;GO:0032991;GO:0032996;GO:0033257;GO:0042088;GO:0042536;GO:0042742;GO:0042771;GO:0042832;GO:0042981;GO:0043066;GO:…	K09258	-	COG0666	R	B cell CLL/lymphoma 3 [Source:HGNCSymbol;Acc:HGNC:998]	602	P20749
ENSG00000160888	19	13150415	13154908	+	3072	IER2	GO:0000977;GO:0001228;GO:0003677;GO:0005634;GO:0005654;GO:0005737;GO:0030182;GO:0045944;GO:0048870;GO:0071774;GO:0000977;GO:0001228;GO:0003677;GO:0005634;GO:0005654;GO:0005737;GO:0030182;GO:0045944;GO:0048870;GO:0071774;GO:0000977;GO:0001228;GO:0003677;GO:0005634;GO:0005654;GO:0005737;GO:0005737;GO:0030182;GO:0045944;GO:0048870;GO:0071774;	-	-	NOG40154	-	immediate early response 2 [Source:HGNCSymbol;Acc:HGNC:28871]	9592	Q9BTL4;A0A024R7H1
ENSG00000171223	19	12791496	12793315	+	1820	JUNB	GO:0000122;GO:0000785;GO:0000790;GO:0000977;GO:0000978;GO:0000978;GO:0000981;GO:0000981;GO:0001228;GO:0001570;GO:0001649;GO:0001701;GO:0001829;GO:0003677;GO:0003677;GO:0003677;GO:0003677;GO:0003700;GO:0003713;GO:0003713;GO:0003714;GO:0005515;GO:0005634;GO:0005654;GO:0005654;GO:0005654;GO:0005667;GO:0006355;GO:0006355;GO:0006357;GO:0006357;GO:0008134;GO:0009314;GO:0009612;GO:0009987;GO:0010033;GO:…	K09028	-	NOG283376	-	JunB proto-oncogene, AP-1 transcription factorsubunit [Source:HGNC Symbol;Acc:HGNC:6205]	3726	P17275;Q5U079
ENSG00000197019	19	40421592	40426025	-	2114	SERTAD1	GO:0000079;GO:0005515;GO:0005634;GO:0005634;GO:0005737;GO:0005737;GO:0008284;GO:0030308;GO:0045893;GO:0045944;	-	-	NOG41149	R	SERTA domain containing 1 [Source:HGNCSymbol;Acc:HGNC:17932]	29950	Q9UHV2;Q53GC0
ENSG00000104856	19	45001430	45038198	+	3035	RELB	GO:0000122;GO:0000977;GO:0000980;GO:0000980;GO:0000981;GO:0000981;GO:0002223;GO:0003677;GO:0003677;GO:0003677;GO:0003677;GO:0003682;GO:0003700;GO:0003700;GO:0003714;GO:0005515;GO:0005634;GO:0005634;GO:0005634;GO:0005634;GO:0005634;GO:0005654;GO:0005654;GO:0005654;GO:0005737;GO:0005737;GO:0005813;GO:0005815;GO:0005829;GO:0005829;GO:0005829;GO:0005829;GO:0005856;GO:0006355;GO:0006357;GO:0006954;GO:…	K09253	-	NOG119056	S	RELB proto-oncogene, NF-kB subunit [Source:HGNCSymbol;Acc:HGNC:9956]	5971	Q01201
ENSG00000104903	19	13099033	13103161	-	3119	LYL1	GO:0000977;GO:0000981;GO:0000981;GO:0001955;GO:0003677;GO:0003677;GO:0005515;GO:0005634;GO:0005634;GO:0006355;GO:0006357;GO:0030183;GO:0030183;GO:0045893;GO:0046983;GO:0060216;GO:0060216;	K15604	-	NOG307510	-	LYL1, basic helix-loop-helix family member[Source:HGNC Symbol;Acc:HGNC:6734]	4066	P12980
ENSG00000128016	19	39406813	39409412	+	2010	ZFP36	GO:0000122;GO:0000165;GO:0000288;GO:0000289;GO:0003729;GO:0005515;GO:0005634;GO:0005737;GO:0005829;GO:0006357;GO:0009611;GO:0017091;GO:0030014;GO:0035278;GO:0035556;GO:0035925;GO:0038066;GO:0043488;GO:0044344;GO:0045085;GO:0045600;GO:0045638;GO:0046872;GO:0046872;GO:0050728;GO:0050779;GO:0060213;GO:0061014;GO:0061158;GO:0070063;GO:0071222;GO:0071356;GO:0071889;GO:1900153;GO:1904246;GO:1990904;GO:…	K15308	-	COG5063	R	ZFP36 ring finger protein [Source:HGNCSymbol;Acc:HGNC:12862]	7538	P26651;M0QY76
ENSG00000128342	22	30240447	30246851	-	3969	LIF	GO:0001974;GO:0005102;GO:0005125;GO:0005125;GO:0005125;GO:0005125;GO:0005125;GO:0005125;GO:0005146;GO:0005146;GO:0005146;GO:0005146;GO:0005515;GO:0005576;GO:0005576;GO:0005576;GO:0005615;GO:0005615;GO:0005615;GO:0005829;GO:0006955;GO:0007260;GO:0007275;GO:0007566;GO:0008083;GO:0008083;GO:0008083;GO:0008083;GO:0008083;GO:0008284;GO:0008284;GO:0008284;GO:0008284;GO:0008284;GO:0008285;GO:0010469;GO:…	K05419	-	NOG45686	-	LIF, interleukin 6 family cytokine [Source:HGNCSymbol;Acc:HGNC:6596]	3976	P15018
ENSG00000169184	22	27748277	27801498	-	7693	MN1	GO:0001957;GO:0003674;GO:0005575;GO:0006355;GO:0007275;GO:0008150;GO:0006355;	K22543	-	NOG40247	-	MN1 proto-oncogene, transcriptional regulator[Source:HGNC Symbol;Acc:HGNC:7180]	4330	Q10571;A0A024R1C3
ENSG00000198947	X	31097677	33339441	-	18910	DMD	GO:0002027;GO:0002162;GO:0002162;GO:0003779;GO:0003779;GO:0003779;GO:0005200;GO:0005515;GO:0005515;GO:0005515;GO:0005737;GO:0005829;GO:0005856;GO:0005856;GO:0005886;GO:0007010;GO:0007517;GO:0008270;GO:0008307;GO:0009986;GO:0010880;GO:0010881;GO:0014809;GO:0014819;GO:0016010;GO:0016013;GO:0016020;GO:0016328;GO:0017022;GO:0017166;GO:0030018;GO:0030049;GO:0030054;GO:0030055;GO:0030175;GO:0031527;GO:…	K10366	-	COG5069	Z	dystrophin [Source:HGNC Symbol;Acc:HGNC:2928]	1756	P11532
ENSG00000087074	19	48872392	48876057	+	3093	PPP1R15A	GO:0000164;GO:0000164;GO:0005515;GO:0005737;GO:0005737;GO:0005739;GO:0005739;GO:0005741;GO:0005783;GO:0005783;GO:0005783;GO:0005789;GO:0005789;GO:0005794;GO:0005829;GO:0006417;GO:0006915;GO:0006915;GO:0006974;GO:0007050;GO:0008157;GO:0016020;GO:0016020;GO:0019888;GO:0019888;GO:0019901;GO:0032058;GO:0032515;GO:0032516;GO:0032516;GO:0034976;GO:0034976;GO:0035308;GO:0036496;GO:0070059;GO:0070972;GO:…	K14019	-	NOG75356	S	protein phosphatase 1 regulatory subunit 15A[Source:HGNC Symbol;Acc:HGNC:14375]	23645	O75807
ENSG00000169429	4	73740506	73743716	+	2274	CXCL8	GO:0001525;GO:0002237;GO:0005125;GO:0005153;GO:0005153;GO:0005515;GO:0005515;GO:0005515;GO:0005576;GO:0005576;GO:0005576;GO:0005615;GO:0005615;GO:0005615;GO:0006935;GO:0006935;GO:0006952;GO:0006954;GO:0006954;GO:0006954;GO:0006955;GO:0006955;GO:0007050;GO:0007165;GO:0007186;GO:0007186;GO:0008009;GO:0008009;GO:0008009;GO:0008009;GO:0008285;GO:0010469;GO:0019221;GO:0019722;GO:0030155;GO:0030593;GO:…	K10030	-	NOG73311	-	C-X-C motif chemokine ligand 8 [Source:HGNCSymbol;Acc:HGNC:6025]	3576	P10145;A0A024RDA5
ENSG00000196639	3	11137093	11263557	+	5546	HRH1	GO:0004930;GO:0004930;GO:0004930;GO:0004930;GO:0004969;GO:0004969;GO:0004969;GO:0004969;GO:0004993;GO:0005829;GO:0005886;GO:0005886;GO:0005886;GO:0005887;GO:0005887;GO:0005887;GO:0005887;GO:0006954;GO:0007165;GO:0007186;GO:0007186;GO:0007186;GO:0007186;GO:0007187;GO:0007200;GO:0007268;GO:0016020;GO:0016021;GO:0016021;GO:0030425;GO:0030594;GO:0032962;GO:0043114;GO:0045907;GO:0048016;GO:0048245;GO:…	K04149	-	NOG318797	-	histamine receptor H1 [Source:HGNCSymbol;Acc:HGNC:5182]	3269	P35367
ENSG00000006062	17	45263119	45317145	-	5784	MAP3K14	GO:0000165;GO:0000166;GO:0000186;GO:0001650;GO:0004672;GO:0004672;GO:0004674;GO:0004674;GO:0004674;GO:0004704;GO:0004709;GO:0005515;GO:0005515;GO:0005524;GO:0005524;GO:0005634;GO:0005737;GO:0005737;GO:0005829;GO:0005829;GO:0006468;GO:0006955;GO:0007249;GO:0016301;GO:0016301;GO:0016310;GO:0016740;GO:0023014;GO:0031098;GO:0032147;GO:0033209;GO:0038061;GO:0043123;GO:0043123;GO:0043231;GO:0051607;GO:…	K04466	EC:2.7.11.25	-	-	mitogen-activated protein kinase kinase kinase 14[Source:HGNC Symbol;Acc:HGNC:6853]	9020	Q99558;Q68D39
ENSG00000006327	16	3018445	3022383	+	1848	TNFRSF12A	GO:0016020;GO:0016021;GO:0001525;GO:0001726;GO:0005515;GO:0005515;GO:0005886;GO:0005886;GO:0006915;GO:0006931;GO:0007155;GO:0007155;GO:0007275;GO:0009986;GO:0016020;GO:0016021;GO:0030154;GO:0033209;GO:0043065;GO:0045765;GO:0045773;GO:0061041;GO:0097191;GO:2001238;GO:0001525;GO:0005515;GO:0005515;GO:0005886;GO:0006915;GO:0007155;GO:0007275;GO:0016020;GO:0016021;GO:0030154;GO:0033209;GO:0043065;GO:…	K05149	-	NOG39144	T	TNF receptor superfamily member 12A [Source:HGNCSymbol;Acc:HGNC:18152]	51330	Q9NP84
ENSG00000077238	16	27313668	27364778	+	5894	IL4R	GO:0002532;GO:0004896;GO:0016021;GO:0019221;GO:0002376;GO:0002532;GO:0002639;GO:0004896;GO:0004913;GO:0005515;GO:0005576;GO:0005615;GO:0005886;GO:0005886;GO:0005887;GO:0006955;GO:0007165;GO:0016020;GO:0016020;GO:0016021;GO:0016021;GO:0016064;GO:0019221;GO:0030728;GO:0035771;GO:0042127;GO:0042832;GO:0043032;GO:0043235;GO:0043306;GO:0043627;GO:0045626;GO:0045630;GO:0090197;GO:0120162;GO:0120162;GO:…	K05071	-	NOG46569	-	interleukin 4 receptor [Source:HGNCSymbol;Acc:HGNC:6015]	3566	P24394
ENSG00000109321	4	74445134	74455009	+	1648	AREG	GO:0000139;GO:0005125;GO:0005154;GO:0005154;GO:0005515;GO:0005615;GO:0005615;GO:0005615;GO:0005615;GO:0005615;GO:0005634;GO:0005737;GO:0005789;GO:0006888;GO:0007173;GO:0007173;GO:0007173;GO:0007186;GO:0007267;GO:0008083;GO:0008083;GO:0008083;GO:0008083;GO:0008283;GO:0008284;GO:0008284;GO:0008284;GO:0008284;GO:0009986;GO:0010469;GO:0012507;GO:0014009;GO:0014070;GO:0016020;GO:0016021;GO:0031175;GO:…	K09782	-	NOG41450	-	amphiregulin [Source:HGNC Symbol;Acc:HGNC:651]	374	P15514
ENSG00000113070	5	140332843	140346631	-	3018	HBEGF	GO:0000165;GO:0004713;GO:0005088;GO:0005154;GO:0005154;GO:0005154;GO:0005154;GO:0005576;GO:0005576;GO:0005615;GO:0005615;GO:0005615;GO:0005615;GO:0005886;GO:0005886;GO:0005887;GO:0005887;GO:0005887;GO:0005887;GO:0007165;GO:0007173;GO:0007173;GO:0007173;GO:0007173;GO:0007517;GO:0008016;GO:0008083;GO:0008083;GO:0008083;GO:0008083;GO:0008201;GO:0008201;GO:0008201;GO:0008284;GO:0008284;GO:0009986;GO:…	K08523	-	NOG45526	R	heparin binding EGF like growth factor [Source:HGNCSymbol;Acc:HGNC:3059]	1839	Q99075
ENSG00000120833	12	93569814	93583487	+	6776	SOCS2	GO:0001558;GO:0001558;GO:0005070;GO:0005131;GO:0005159;GO:0005159;GO:0005515;GO:0005737;GO:0005737;GO:0005829;GO:0005942;GO:0007259;GO:0008269;GO:0008269;GO:0009966;GO:0009967;GO:0009968;GO:0016567;GO:0032355;GO:0032870;GO:0035556;GO:0038111;GO:0040008;GO:0043066;GO:0043551;GO:0043687;GO:0046426;GO:0046627;GO:0046854;GO:0046935;GO:0060396;GO:0001558;GO:0001558;GO:0005070;GO:0005131;GO:0005159;GO:…	-	-	NOG320153	-	suppressor of cytokine signaling 2 [Source:HGNCSymbol;Acc:HGNC:19382]	-	-
ENSG00000124225	20	57648392	57711536	-	5619	PMEPA1	GO:0000139;GO:0005515;GO:0005768;GO:0005794;GO:0005886;GO:0009968;GO:0010008;GO:0010991;GO:0010991;GO:0016020;GO:0016021;GO:0030512;GO:0030512;GO:0030512;GO:0030521;GO:0031901;GO:0031901;GO:0043231;GO:0050699;GO:0060394;GO:0070412;GO:0070412;GO:0000139;GO:0005515;GO:0005768;GO:0005794;GO:0005886;GO:0009968;GO:0010008;GO:0010991;GO:0010991;GO:0016020;GO:0016021;GO:0030512;GO:0030512;GO:0030512;GO:…	-	-	NOG27420	-	prostate transmembrane protein, androgen induced 1[Source:HGNC Symbol;Acc:HGNC:14107]	56937	Q969W9
ENSG00000125148	16	56608199	56609497	+	1299	MT2A	GO:0005515;GO:0005634;GO:0005634;GO:0005737;GO:0005737;GO:0005829;GO:0006878;GO:0006882;GO:0008144;GO:0008270;GO:0010038;GO:0010273;GO:0035690;GO:0036016;GO:0036018;GO:0045926;GO:0046872;GO:0046872;GO:0046872;GO:0048471;GO:0060333;GO:0071276;GO:0071280;GO:0071294;GO:0071294;GO:0046872;GO:0046872;	K14739	-	-	-	metallothionein 2A [Source:HGNCSymbol;Acc:HGNC:7406]	4502	P02795
ENSG00000135919	2	223975112	224039319	-	8891	SERPINE2	GO:0004867;GO:0004867;GO:0004867;GO:0004867;GO:0005102;GO:0005515;GO:0005515;GO:0005515;GO:0005539;GO:0005576;GO:0005576;GO:0005576;GO:0005576;GO:0005615;GO:0005615;GO:0005615;GO:0005829;GO:0007275;GO:0007399;GO:0007596;GO:0008201;GO:0008201;GO:0010466;GO:0010757;GO:0010951;GO:0010955;GO:0030154;GO:0030195;GO:0030334;GO:0030414;GO:0031091;GO:0031091;GO:0031232;GO:0031594;GO:0045861;GO:0048711;GO:…	K16643	-	COG4826	O	serpin family E member 2 [Source:HGNCSymbol;Acc:HGNC:8951]	5270	P07093;A0A024R451
ENSG00000143384	1	150574551	150579738	-	4371	MCL1	GO:0005739;GO:0016020;GO:0016021;GO:0042981;GO:0001709;GO:0005515;GO:0005515;GO:0005634;GO:0005634;GO:0005634;GO:0005654;GO:0005737;GO:0005737;GO:0005739;GO:0005739;GO:0005739;GO:0005739;GO:0005741;GO:0005741;GO:0005829;GO:0005829;GO:0005829;GO:0006915;GO:0007275;GO:0008320;GO:0008630;GO:0008630;GO:0010507;GO:0016020;GO:0016020;GO:0016020;GO:0016021;GO:0019221;GO:0019725;GO:0030154;GO:0034097;GO:…	K02539	-	NOG282183	-	MCL1, BCL2 family apoptosis regulator [Source:HGNCSymbol;Acc:HGNC:6943]	4170	Q07820
ENSG00000160223	21	44217014	44240966	-	9341	ICOSLG	GO:0002250;GO:0002376;GO:0005102;GO:0005102;GO:0005515;GO:0005886;GO:0005886;GO:0005886;GO:0006952;GO:0006972;GO:0007165;GO:0009897;GO:0016020;GO:0016021;GO:0031295;GO:0036464;GO:0042104;GO:0042110;GO:0042113;GO:0042802;GO:0050776;GO:0050852;GO:0070062;GO:0002250;GO:0002376;GO:0005102;GO:0005102;GO:0005515;GO:0005886;GO:0005886;GO:0005886;GO:0006952;GO:0006972;GO:0007165;GO:0009897;GO:0016020;GO:…	K06710	-	NOG43300	S	inducible T cell costimulator ligand [Source:HGNCSymbol;Acc:HGNC:17087]	23308	O75144;A0N0L8
ENSG00000167604	19	35887653	35902303	-	3198	NFKBID	GO:0005515;GO:0005634;GO:0005634;GO:0006954;GO:0050852;GO:2000321;GO:0005515;GO:0005634;GO:0005634;GO:0005634;GO:0006954;GO:0032088;GO:0033085;GO:0043124;GO:0050852;GO:0050852;GO:0051059;GO:0070245;GO:2000321;GO:2000321;	K14214	-	NOG283039	-	NFKB inhibitor delta [Source:HGNCSymbol;Acc:HGNC:15671]	84807	Q8NI38
ENSG00000168685	5	35852695	35879603	+	6060	IL7R	GO:0000018;GO:0000902;GO:0001915;GO:0002377;GO:0003823;GO:0004896;GO:0004896;GO:0004917;GO:0005515;GO:0005576;GO:0005886;GO:0005886;GO:0006955;GO:0007165;GO:0007166;GO:0008284;GO:0008361;GO:0009897;GO:0010628;GO:0016020;GO:0016020;GO:0016021;GO:0030217;GO:0030665;GO:0033089;GO:0038111;GO:0042100;GO:0048535;GO:0048872;GO:0061024;GO:0070233;GO:1904894;GO:0004896;GO:0016020;GO:0019221;	K05072	-	NOG39823	S	interleukin 7 receptor [Source:HGNCSymbol;Acc:HGNC:6024]	3575	P16871
ENSG00000170873	8	124550790	124728429	-	7727	MTSS1	GO:0001726;GO:0003779;GO:0003779;GO:0003785;GO:0005102;GO:0005515;GO:0005737;GO:0005856;GO:0007009;GO:0007155;GO:0007169;GO:0015629;GO:0030035;GO:0030036;GO:0030036;GO:0030139;GO:0042802;GO:0050680;GO:0061333;GO:0071498;GO:0072102;GO:0072160;GO:2001013;GO:0001726;GO:0003779;GO:0003779;GO:0003785;GO:0005102;GO:0005515;GO:0005737;GO:0005856;GO:0007009;GO:0007155;GO:0007169;GO:0015629;GO:0030035;GO:…	K20128	-	NOG72831	-	MTSS1, I-BAR domain containing [Source:HGNCSymbol;Acc:HGNC:20443]	9788	O43312
ENSG00000171951	2	223596940	223602503	-	2719	SCG2	GO:0000165;GO:0001525;GO:0001525;GO:0001525;GO:0001937;GO:0001938;GO:0005125;GO:0005125;GO:0005515;GO:0005576;GO:0005615;GO:0005615;GO:0005788;GO:0006954;GO:0009306;GO:0010469;GO:0030141;GO:0030141;GO:0031045;GO:0035556;GO:0042056;GO:0042056;GO:0043542;GO:0043687;GO:0044267;GO:0048245;GO:0048245;GO:0050918;GO:0050930;GO:0098992;GO:2000352;GO:2001237;GO:0030141;GO:0030141;	-	-	NOG47177	-	secretogranin II [Source:HGNCSymbol;Acc:HGNC:10575]	7857	P13521
ENSG00000173530	8	23135588	23164030	-	3538	TNFRSF10D	GO:0004888;GO:0005886;GO:0005886;GO:0006915;GO:0007165;GO:0007166;GO:0009986;GO:0016020;GO:0016021;GO:0042981;GO:0043066;GO:0045569;GO:0050900;	K22702	-	NOG80202	-	TNF receptor superfamily member 10d [Source:HGNCSymbol;Acc:HGNC:11907]	8793	Q9UBN6
ENSG00000174500	3	112120841	112133305	-	3783	GCSAM	GO:0003779;GO:0005515;GO:0005515;GO:0005737;GO:0005886;GO:0016020;GO:0019901;GO:0045159;GO:0050855;GO:0050855;GO:2000401;GO:2000402;GO:0003779;GO:0005515;GO:0005515;GO:0005737;GO:0005886;GO:0016020;GO:0019901;GO:0045159;GO:0050855;GO:0050855;GO:2000401;GO:2000402;GO:0050855;GO:2000401;GO:0050855;GO:2000401;GO:0003779;GO:0005515;GO:0005515;GO:0005737;GO:0005886;GO:0016020;GO:0019901;GO:0045159;GO:…	-	-	NOG41792	-	germinal center associated signaling and motility[Source:HGNC Symbol;Acc:HGNC:20253]	257144	Q8N6F7
ENSG00000187678	5	142310427	142326455	-	6565	SPRY4	GO:0007275;GO:0009966;GO:0016020;GO:0043407;GO:0070373;GO:1990830;GO:0005515;GO:0005737;GO:0005829;GO:0005886;GO:0005925;GO:0007275;GO:0007275;GO:0009966;GO:0016020;GO:0016020;GO:0032587;GO:0040037;GO:0042995;GO:0043407;GO:0046580;GO:0070373;GO:0070373;	K17385	-	NOG68509	S	sprouty RTK signaling antagonist 4 [Source:HGNCSymbol;Acc:HGNC:15533]	81848	Q9C004
ENSG00000187848	12	132618776	132622386	+	1973	P2RX2	GO:0001614;GO:0001614;GO:0001614;GO:0002931;GO:0004931;GO:0004931;GO:0004931;GO:0004931;GO:0005216;GO:0005524;GO:0005524;GO:0005639;GO:0005886;GO:0005886;GO:0005887;GO:0005887;GO:0006811;GO:0006811;GO:0006812;GO:0007596;GO:0007605;GO:0010524;GO:0015276;GO:0016020;GO:0016020;GO:0016021;GO:0016021;GO:0016324;GO:0033198;GO:0034220;GO:0035381;GO:0035590;GO:0042802;GO:0043025;GO:0043235;GO:0050850;GO:…	K05216	-	NOG68669	-	purinergic receptor P2X 2 [Source:HGNCSymbol;Acc:HGNC:15459]	22953	Q9UBL9;Q32MC3
ENSG00000047365	4	35948221	36244509	-	12428	ARAP2	GO:0005096;GO:0005096;GO:0005096;GO:0005547;GO:0005547;GO:0005737;GO:0005829;GO:0007165;GO:0043547;GO:0046872;GO:0051056;GO:0005096;GO:0005096;GO:0005547;GO:0007165;GO:0043547;	K18440	-	COG5347	U	ArfGAP with RhoGAP domain, ankyrin repeat and PHdomain 2 [Source:HGNC Symbol;Acc:HGNC:16924]	116984	Q8WZ64;A7E2A5
ENSG00000105339	8	141117278	141195808	+	14670	DENND3	GO:0005085;GO:0005737;GO:0005829;GO:0008333;GO:0008333;GO:0017112;GO:0017112;GO:0017112;GO:0044257;GO:0044257;GO:0005085;GO:0005737;GO:0005829;GO:0008333;GO:0017112;GO:0017112;GO:0044257;	K20162	-	NOG115977	S	DENN domain containing 3 [Source:HGNCSymbol;Acc:HGNC:29134]	22898	A2RUS2
ENSG00000120875	8	29333064	29350668	-	7257	DUSP4	GO:0000188;GO:0000188;GO:0004721;GO:0004725;GO:0004725;GO:0004725;GO:0005515;GO:0005634;GO:0005634;GO:0005654;GO:0005654;GO:0005737;GO:0006470;GO:0008138;GO:0008138;GO:0008330;GO:0016311;GO:0016311;GO:0016787;GO:0016791;GO:0016791;GO:0017017;GO:0017017;GO:0035335;GO:0035970;GO:0070373;GO:1990439;GO:0000188;GO:0000188;GO:0004721;GO:0004725;GO:0004725;GO:0004725;GO:0005515;GO:0005634;GO:0005634;GO:…	K04459	-	COG2453	T	dual specificity phosphatase 4 [Source:HGNCSymbol;Acc:HGNC:3070]	1846	Q13115
ENSG00000137331	6	30743199	30744554	-	1356	IER3	GO:0043066;GO:0005515;GO:0005634;GO:0005634;GO:0005829;GO:0006915;GO:0009653;GO:0014066;GO:0016020;GO:0016021;GO:0043066;GO:0043066;GO:2001020;GO:2001020;	-	-	NOG46208	R	immediate early response 3 [Source:HGNCSymbol;Acc:HGNC:5392]	8870	P46695;A0A1U9X7X2
ENSG00000138166	10	110497838	110511544	+	2615	DUSP5	GO:0000165;GO:0000187;GO:0000188;GO:0004721;GO:0004725;GO:0004725;GO:0004725;GO:0005515;GO:0005634;GO:0005634;GO:0005654;GO:0005737;GO:0006470;GO:0006470;GO:0008138;GO:0008138;GO:0008138;GO:0008138;GO:0016311;GO:0016311;GO:0016787;GO:0016791;GO:0016791;GO:0017017;GO:0017017;GO:0035335;GO:0035970;	K04459	-	COG2453	T	dual specificity phosphatase 5 [Source:HGNCSymbol;Acc:HGNC:3071]	1847	Q16690
ENSG00000139318	12	89347232	89353271	-	4632	DUSP6	GO:0000165;GO:0000187;GO:0000188;GO:0000188;GO:0001933;GO:0004721;GO:0004721;GO:0004725;GO:0004725;GO:0005654;GO:0005737;GO:0005737;GO:0005737;GO:0005829;GO:0005829;GO:0005829;GO:0006470;GO:0006470;GO:0006470;GO:0008138;GO:0008138;GO:0008138;GO:0008138;GO:0010033;GO:0010942;GO:0014070;GO:0016311;GO:0016787;GO:0016791;GO:0017017;GO:0017017;GO:0017017;GO:0030154;GO:0035335;GO:0035335;GO:0042493;GO:…	K21946	-	COG2453	T	dual specificity phosphatase 6 [Source:HGNCSymbol;Acc:HGNC:3072]	1848	Q16828;A0A024RBC1
ENSG00000158050	2	96143166	96145440	-	1932	DUSP2	GO:0000188;GO:0000188;GO:0004721;GO:0004721;GO:0004725;GO:0004725;GO:0004725;GO:0005515;GO:0005634;GO:0005634;GO:0005634;GO:0005634;GO:0005737;GO:0006470;GO:0006470;GO:0006470;GO:0008138;GO:0008138;GO:0008330;GO:0016311;GO:0016787;GO:0016791;GO:0017017;GO:0017017;GO:0031965;GO:0035335;GO:0051019;	K04459	-	COG2453	T	dual specificity phosphatase 2 [Source:HGNCSymbol;Acc:HGNC:3068]	1844	Q05923
ENSG00000164430	6	73413515	73452276	-	4155	CGAS	GO:0000166;GO:0002218;GO:0002230;GO:0002376;GO:0003677;GO:0003682;GO:0003690;GO:0005515;GO:0005524;GO:0005525;GO:0005737;GO:0005829;GO:0005829;GO:0006974;GO:0010753;GO:0016740;GO:0016779;GO:0032481;GO:0032481;GO:0038001;GO:0043950;GO:0045087;GO:0046872;GO:0051607;GO:0061501;GO:0061501;GO:0071360;GO:2000774;GO:0000166;GO:0002218;GO:0002218;GO:0002230;GO:0002230;GO:0002376;GO:0002637;GO:0003677;GO:…	K17834	EC:2.7.7.86	NOG138619	S	cyclic GMP-AMP synthase [Source:HGNCSymbol;Acc:HGNC:21367]	115004	Q8N884
ENSG00000166289	19	29665056	29675457	+	2681	PLEKHF1	GO:0005515;GO:0005634;GO:0005737;GO:0005764;GO:0005764;GO:0005764;GO:0005765;GO:0005768;GO:0006915;GO:0007032;GO:0010008;GO:0010314;GO:0010508;GO:0016050;GO:0032266;GO:0035091;GO:0046872;GO:0046872;GO:0048471;GO:0070273;GO:0072659;GO:2001244;GO:0005515;GO:0005634;GO:0005737;GO:0005764;GO:0005764;GO:0005765;GO:0005768;GO:0006915;GO:0007032;GO:0010008;GO:0010314;GO:0010508;GO:0016050;GO:0032266;GO:…	-	-	NOG308864	-	pleckstrin homology and FYVE domain containing 1[Source:HGNC Symbol;Acc:HGNC:20764]	79156	Q96S99
ENSG00000175463	11	67403915	67410089	+	4993	TBC1D10C	GO:0005096;GO:0005096;GO:0005515;GO:0005829;GO:0005886;GO:0005886;GO:0006886;GO:0016020;GO:0017137;GO:0031527;GO:0042147;GO:0043312;GO:0090630;GO:0101003;GO:0005096;GO:0005096;GO:0005515;GO:0005829;GO:0005886;GO:0005886;GO:0006886;GO:0016020;GO:0017137;GO:0031527;GO:0042147;GO:0043312;GO:0090630;GO:0101003;GO:0005096;GO:0005096;GO:0005515;GO:0005829;GO:0005886;GO:0005886;GO:0006886;GO:0016020;GO:…	K19944	-	COG5210	R	TBC1 domain family member 10C [Source:HGNCSymbol;Acc:HGNC:24702]	374403	Q8IV04
ENSG00000100276	22	29312933	29319679	-	2240	RASL10A	GO:0000166;GO:0003924;GO:0003924;GO:0005525;GO:0005525;GO:0005634;GO:0005730;GO:0005886;GO:0007165;GO:0007264;GO:0016020;GO:0016020;GO:0000166;GO:0003924;GO:0003924;GO:0005525;GO:0005525;GO:0005634;GO:0005730;GO:0005886;GO:0007165;GO:0007264;GO:0016020;GO:0016020;	K07850	-	NOG300332	-	RAS like family 10 member A [Source:HGNCSymbol;Acc:HGNC:16954]	10633	Q92737;A0A024R1C8
ENSG00000112149	6	14117256	14136918	+	2515	CD83	GO:0016020;GO:0016021;GO:0005515;GO:0005886;GO:0005887;GO:0006952;GO:0006959;GO:0007165;GO:0009897;GO:0014070;GO:0016020;GO:0016021;GO:0032713;GO:0032733;GO:0032743;GO:0043372;	K06510	-	NOG44884	-	CD83 molecule [Source:HGNC Symbol;Acc:HGNC:1703]	9308	Q01151
ENSG00000123094	12	25959029	26079892	+	7619	RASSF8	GO:0007165;GO:0034334;GO:0007165;GO:0034334;GO:0007165;GO:0034334;GO:0007165;GO:0034334;GO:0007165;GO:0034334;GO:0007165;GO:0034334;GO:0007165;GO:0034334;GO:0007165;GO:0034334;GO:0007165;GO:0007165;GO:0034334;GO:0007165;GO:0034334;GO:0007165;GO:0034334;GO:0007165;GO:0034334;GO:0034334;	K09855	-	NOG306245	-	Ras association domain family member 8 [Source:HGNCSymbol;Acc:HGNC:13232]	11228	Q8NHQ8;A0A024RB12;A8K8G8
ENSG00000151012	4	138164097	138242349	-	9645	SLC7A11	GO:0005515;GO:0005791;GO:0005856;GO:0005886;GO:0005886;GO:0006749;GO:0006865;GO:0006865;GO:0006979;GO:0007420;GO:0007420;GO:0008542;GO:0009636;GO:0009986;GO:0014070;GO:0015179;GO:0015327;GO:0016020;GO:0016020;GO:0016020;GO:0016021;GO:0016021;GO:0016021;GO:0021591;GO:0021756;GO:0022857;GO:0030534;GO:0031526;GO:0033029;GO:0034599;GO:0034775;GO:0035094;GO:0042127;GO:0043231;GO:0048021;GO:0048286;GO:…	K13869	-	COG0531	E	solute carrier family 7 member 11 [Source:HGNCSymbol;Acc:HGNC:11059]	23657	Q9UPY5
ENSG00000181408	17	82374230	82375586	+	1357	UTS2R	GO:0001604;GO:0001604;GO:0004930;GO:0004930;GO:0004930;GO:0005886;GO:0005886;GO:0005887;GO:0007165;GO:0007165;GO:0007186;GO:0007186;GO:0007186;GO:0007218;GO:0008015;GO:0008217;GO:0008528;GO:0016020;GO:0016020;GO:0016021;GO:0016021;GO:0097746;	K04241	-	NOG244148	-	urotensin 2 receptor [Source:HGNCSymbol;Acc:HGNC:4468]	2837	Q9UKP6
ENSG00000181773	1	27392644	27395814	+	2115	GPR3	GO:0004930;GO:0004930;GO:0004930;GO:0005515;GO:0005886;GO:0005887;GO:0007165;GO:0007186;GO:0007186;GO:0007189;GO:0016020;GO:0016021;GO:0016021;GO:0040020;GO:0120162;GO:0120162;	K04311	-	NOG320944	-	G protein-coupled receptor 3 [Source:HGNCSymbol;Acc:HGNC:4484]	2827	P46089;F1DAM5
ENSG00000188042	2	234493041	234497053	-	4013	ARL4C	GO:0000166;GO:0003924;GO:0005515;GO:0005525;GO:0005525;GO:0005525;GO:0005634;GO:0005737;GO:0005737;GO:0005829;GO:0005886;GO:0005886;GO:0005886;GO:0006886;GO:0016020;GO:0016192;GO:0030175;GO:0032456;GO:0032456;GO:0042995;GO:0043014;GO:0000166;GO:0003924;GO:0005515;GO:0005525;GO:0005525;GO:0005525;GO:0005634;GO:0005737;GO:0005737;GO:0005829;GO:0005886;GO:0005886;GO:0005886;GO:0006886;GO:0016020;GO:…	K07945	-	COG1100	R	ADP ribosylation factor like GTPase 4C [Source:HGNCSymbol;Acc:HGNC:698]	10123	P56559;A0A024R4C5
ENSG00000103196	16	84819984	84920768	+	7965	CRISPLD2	GO:0005539;GO:0005539;GO:0005576;GO:0005576;GO:0005576;GO:0005615;GO:0008201;GO:0030133;GO:0030198;GO:0030324;GO:0031012;GO:0034774;GO:0043312;GO:0060325;GO:0070062;GO:1904813;GO:0005576;GO:0005539;GO:0005576;GO:0005576;GO:0005576;GO:0005615;GO:0030133;GO:0034774;GO:0043312;GO:0060325;GO:0070062;GO:1904813;GO:0005539;GO:0005576;GO:0005576;GO:0005576;GO:0005615;GO:0030133;GO:0034774;GO:0043312;GO:…	-	-	COG2340	S	cysteine rich secretory protein LCCL domaincontaining 2 [Source:HGNC Symbol;Acc:HGNC:25248]	83716	Q9H0B8;A0A140VK80
ENSG00000117226	1	89006666	89022894	-	4297	GBP3	GO:0000139;GO:0000166;GO:0002376;GO:0003924;GO:0005515;GO:0005515;GO:0005525;GO:0005525;GO:0005737;GO:0005794;GO:0005829;GO:0016020;GO:0016787;GO:0042803;GO:0048471;GO:0051607;GO:0071347;GO:0071356;GO:0000166;GO:0003924;GO:0005525;GO:0005525;GO:0016020;GO:0000166;GO:0003924;GO:0005525;GO:0005525;GO:0016020;GO:0000166;GO:0003924;GO:0005525;GO:0005525;GO:0016020;GO:0003924;GO:0005525;GO:0003924;GO:…	K20899	-	NOG288755	-	guanylate binding protein 3 [Source:HGNCSymbol;Acc:HGNC:4184]	2635	Q9H0R5
ENSG00000162894	1	206904386	206923247	-	2348	FCMR	GO:0002376;GO:0005576;GO:0006968;GO:0016020;GO:0016021;GO:0043066;GO:0002376;GO:0005576;GO:0006968;GO:0016020;GO:0016021;GO:0043066;GO:0002376;GO:0005576;GO:0006968;GO:0016020;GO:0016021;GO:0043066;	-	-	NOG42220	S	Fc fragment of IgM receptor [Source:HGNCSymbol;Acc:HGNC:14315]	9214	O60667
ENSG00000173110	1	161524540	161526910	+	2371	HSPA6	GO:0000166;GO:0005515;GO:0005524;GO:0005524;GO:0005576;GO:0005634;GO:0005737;GO:0005737;GO:0005814;GO:0005829;GO:0005829;GO:0006986;GO:0006986;GO:0008180;GO:0008180;GO:0016887;GO:0019899;GO:0031072;GO:0031072;GO:0032991;GO:0034605;GO:0034605;GO:0034620;GO:0034774;GO:0042026;GO:0042026;GO:0042623;GO:0042623;GO:0043312;GO:0044183;GO:0051082;GO:0051082;GO:0051085;GO:0051787;GO:0070062;GO:0072562;GO:…	K03283	-	COG0443	O	heat shock protein family A (Hsp70) member 6[Source:HGNC Symbol;Acc:HGNC:5239]	3310	P17066;B3KSM6;A0A384NKX5
ENSG00000003436	2	187464230	187565760	-	11714	TFPI	GO:0004866;GO:0004867;GO:0004867;GO:0004867;GO:0005576;GO:0005576;GO:0005576;GO:0005615;GO:0005615;GO:0005783;GO:0005886;GO:0005901;GO:0007596;GO:0007596;GO:0007598;GO:0007599;GO:0009986;GO:0010466;GO:0010466;GO:0010951;GO:0016020;GO:0030195;GO:0030414;GO:0030414;GO:0031090;GO:0031225;GO:0043231;GO:0071383;GO:0004866;GO:0004867;GO:0004867;GO:0004867;GO:0005576;GO:0005576;GO:0005576;GO:0005615;GO:…	K03909	-	NOG86404	S	tissue factor pathway inhibitor [Source:HGNCSymbol;Acc:HGNC:11760]	7035	P10646
ENSG00000126231	13	113158654	113172383	+	1666	PROZ	GO:0004252;GO:0005509;GO:0005576;GO:0005576;GO:0005615;GO:0005788;GO:0005796;GO:0006508;GO:0006888;GO:0007596;GO:0007596;GO:0007596;GO:0007599;GO:0070062;GO:0004252;GO:0005509;GO:0005576;GO:0005576;GO:0005576;GO:0005615;GO:0005788;GO:0005796;GO:0006508;GO:0006888;GO:0007596;GO:0007596;GO:0007596;GO:0007596;GO:0007599;GO:0070062;	-	-	NOG145536	S	protein Z, vitamin K dependent plasma glycoprotein[Source:HGNC Symbol;Acc:HGNC:9460]	8858	P22891
ENSG00000185933	10	103453387	103458888	-	3053	CALHM1	GO:0005227;GO:0005227;GO:0005244;GO:0005244;GO:0005244;GO:0005245;GO:0005262;GO:0005783;GO:0005789;GO:0005886;GO:0005887;GO:0005887;GO:0006811;GO:0006812;GO:0006812;GO:0006816;GO:0015867;GO:0015867;GO:0016020;GO:0016021;GO:0034765;GO:0042802;GO:0050909;GO:0050913;GO:0050913;GO:0050916;GO:0050916;GO:0050917;GO:0050917;GO:0051260;GO:0070588;	K19738	-	NOG81906	K	calcium homeostasis modulator 1 [Source:HGNCSymbol;Acc:HGNC:23494]	255022	Q8IU99
ENSG00000198771	1	167630093	167706249	+	5718	RCSD1	GO:0003009;GO:0005884;GO:0051015;GO:0071474;	K18615	-	NOG78730	K	RCSD domain containing 1 [Source:HGNCSymbol;Acc:HGNC:28310]	92241	Q6JBY9
ENSG00000213397	X	153447666	153495516	-	3968	HAUS7	GO:0000086;GO:0005515;GO:0005737;GO:0005813;GO:0005815;GO:0005819;GO:0005829;GO:0005856;GO:0005874;GO:0007049;GO:0007098;GO:0010389;GO:0031996;GO:0051225;GO:0051301;GO:0070652;GO:0097711;	K16590	-	NOG42287	-	HAUS augmin like complex subunit 7 [Source:HGNCSymbol;Acc:HGNC:32979]	55559	Q99871

## Sheet: 0h_vs_3h.DESeq.Down
ID	Chromosome	Start Site	End Site	Direction	Length	Name	GO	KEGG	EC	eggNOG Class	eggNOG	Description	NCBI	UniProtID
ENSG00000105649	19	18196784	18204074	-	1818	RAB3A	GO:0000166;GO:0001669;GO:0001671;GO:0003016;GO:0003924;GO:0003924;GO:0003924;GO:0003924;GO:0005515;GO:0005515;GO:0005525;GO:0005525;GO:0005525;GO:0005768;GO:0005768;GO:0005829;GO:0005829;GO:0005886;GO:0005886;GO:0005886;GO:0006886;GO:0006887;GO:0006904;GO:0007005;GO:0007274;GO:0007409;GO:0007409;GO:0008021;GO:0008021;GO:0008021;GO:0008021;GO:0008021;GO:0008022;GO:0009306;GO:0009791;GO:0014047;GO:…	K07882	-	COG1100	R	RAB3A, member RAS oncogene family [Source:HGNCSymbol;Acc:HGNC:9777]	5864	P20336;A0A024R7I7
ENSG00000106003	7	2512529	2529177	+	3418	LFNG	GO:0000139;GO:0001756;GO:0002315;GO:0003674;GO:0005576;GO:0005794;GO:0007275;GO:0007389;GO:0008375;GO:0008593;GO:0008593;GO:0009887;GO:0014807;GO:0016020;GO:0016020;GO:0016021;GO:0016740;GO:0016757;GO:0016757;GO:0030173;GO:0030217;GO:0033829;GO:0033829;GO:0033829;GO:0036066;GO:0036066;GO:0046872;GO:1902367;GO:1903561;GO:0000139;GO:0001756;GO:0002315;GO:0003674;GO:0005576;GO:0005794;GO:0007275;GO:…	K05948	EC:2.4.1.222	NOG70217	-	LFNG O-fucosylpeptide 3-beta-N-acetylglucosaminyltransferase [Source:HGNCSymbol;Acc:HGNC:6560]	3955	Q8NES3
ENSG00000115738	2	8678845	8684453	+	2205	ID2	GO:0000122;GO:0000981;GO:0001085;GO:0001656;GO:0001779;GO:0001966;GO:0002521;GO:0003149;GO:0003166;GO:0003700;GO:0005515;GO:0005515;GO:0005634;GO:0005634;GO:0005634;GO:0005634;GO:0005634;GO:0005634;GO:0005737;GO:0005737;GO:0005737;GO:0005737;GO:0005737;GO:0005829;GO:0007275;GO:0007275;GO:0007507;GO:0007623;GO:0007623;GO:0008134;GO:0008344;GO:0009649;GO:0010628;GO:0010628;GO:0010629;GO:0010629;GO:…	K17693	-	NOG76382	T	inhibitor of DNA binding 2 [Source:HGNCSymbol;Acc:HGNC:5361]	3398	Q02363;Q53T66
ENSG00000131711	5	72107234	72209570	+	12630	MAP1B	GO:0000226;GO:0005874;GO:0007399;GO:0008017;GO:0000226;GO:0000226;GO:0001578;GO:0001750;GO:0001764;GO:0003779;GO:0005198;GO:0005515;GO:0005515;GO:0005737;GO:0005829;GO:0005829;GO:0005829;GO:0005856;GO:0005874;GO:0005874;GO:0005874;GO:0005874;GO:0005875;GO:0005875;GO:0005886;GO:0007399;GO:0007409;GO:0007409;GO:0008017;GO:0008017;GO:0008017;GO:0009987;GO:0014069;GO:0015631;GO:0016358;GO:0016358;GO:…	K10429	-	NOG12793	-	microtubule associated protein 1B [Source:HGNCSymbol;Acc:HGNC:6836]	4131	P46821;Q6PJD3;Q86X89
ENSG00000132749	11	68707440	68751564	-	5833	TESMIN	GO:0005634;GO:0005634;GO:0005737;GO:0005737;GO:0006875;GO:0007275;GO:0007283;GO:0010038;GO:0030154;GO:0046872;GO:0005634;GO:0005737;GO:0006875;GO:0007275;GO:0007283;GO:0010038;GO:0030154;GO:0046872;GO:0005634;GO:0005737;GO:0006875;GO:0007275;GO:0007283;GO:0010038;GO:0030154;GO:0046872;	-	-	NOG303998	-	testis expressed metallothionein like protein[Source:HGNC Symbol;Acc:HGNC:7446]	9633	Q9Y4I5
ENSG00000134215	1	107571160	107965144	-	7271	VAV3	GO:0001525;GO:0005070;GO:0005085;GO:0005085;GO:0005085;GO:0005085;GO:0005089;GO:0005089;GO:0005089;GO:0005096;GO:0005154;GO:0005515;GO:0005737;GO:0005829;GO:0005886;GO:0006906;GO:0006974;GO:0007186;GO:0007229;GO:0007264;GO:0007264;GO:0008361;GO:0009967;GO:0016477;GO:0030031;GO:0030032;GO:0030168;GO:0030593;GO:0030676;GO:0030890;GO:0035023;GO:0035556;GO:0038095;GO:0038096;GO:0042493;GO:0043065;GO:…	K05730	-	NOG326494	-	vav guanine nucleotide exchange factor 3[Source:HGNC Symbol;Acc:HGNC:12659]	10451	Q9UKW4
ENSG00000134986	5	111662621	111997464	-	9337	NREP	GO:0005515;GO:0005634;GO:0005737;GO:0005737;GO:0017015;GO:0031103;GO:0045664;GO:0005515;GO:0005634;GO:0005737;GO:0005737;GO:0017015;GO:0031103;GO:0045664;GO:0005515;GO:0005634;GO:0005737;GO:0005737;GO:0017015;GO:0031103;GO:0045664;GO:0005515;GO:0005634;GO:0005737;GO:0005737;GO:0017015;GO:0031103;GO:0045664;GO:0005515;GO:0005634;GO:0005737;GO:0005737;GO:0017015;GO:0031103;GO:0045664;GO:0005515;GO:…	-	-	NOG39124	S	neuronal regeneration related protein [Source:HGNCSymbol;Acc:HGNC:16834]	9315	Q16612
ENSG00000138835	9	113444731	113597743	+	13793	RGS3	GO:0000188;GO:0005096;GO:0005515;GO:0005634;GO:0005634;GO:0005654;GO:0005737;GO:0005829;GO:0005829;GO:0005886;GO:0008277;GO:0009968;GO:0016020;GO:0043547;GO:0000188;GO:0005096;GO:0005515;GO:0005634;GO:0005654;GO:0005737;GO:0005829;GO:0005829;GO:0005886;GO:0008277;GO:0009968;GO:0016020;GO:0043547;GO:0000188;GO:0005096;GO:0005515;GO:0005634;GO:0005654;GO:0005737;GO:0005829;GO:0005829;GO:0005886;GO:…	K07524	-	NOG266213	-	regulator of G protein signaling 3 [Source:HGNCSymbol;Acc:HGNC:9999]	5998	P49796
ENSG00000139187	12	8950044	9010760	+	2598	KLRG1	GO:0016020;GO:0016021;GO:0030246;GO:0002376;GO:0005515;GO:0005515;GO:0005886;GO:0006954;GO:0006968;GO:0007166;GO:0016020;GO:0016021;GO:0016021;GO:0030246;GO:0030246;GO:0030246;GO:0038023;GO:0043231;GO:0043231;GO:0045087;GO:0002376;GO:0005515;GO:0005515;GO:0005886;GO:0006954;GO:0006968;GO:0007166;GO:0016020;GO:0016021;GO:0016021;GO:0030246;GO:0030246;GO:0030246;GO:0038023;GO:0043231;GO:0043231;GO:…	K10076	-	NOG283577	-	killer cell lectin like receptor G1 [Source:HGNCSymbol;Acc:HGNC:6380]	10219	Q96E93
ENSG00000141576	17	76142453	76240373	-	7805	RNF157	GO:0005737;GO:0005737;GO:0016567;GO:0016567;GO:0016740;GO:0043066;GO:0043066;GO:0044297;GO:0044297;GO:0046872;GO:0051865;GO:0051865;GO:0061630;GO:0061630;GO:1903861;GO:1903861;GO:0005737;GO:0016567;GO:0016740;GO:0043066;GO:0044297;GO:0046872;GO:0051865;GO:0061630;GO:1903861;	-	-	NOG332026	-	ring finger protein 157 [Source:HGNCSymbol;Acc:HGNC:29402]	114804	Q96PX1
ENSG00000160685	1	155002630	155018522	+	4303	ZBTB7B	GO:0000122;GO:0000978;GO:0000981;GO:0001158;GO:0001228;GO:0001865;GO:0003676;GO:0003677;GO:0005515;GO:0005634;GO:0005634;GO:0005634;GO:0005654;GO:0006366;GO:0007275;GO:0007398;GO:0007595;GO:0010628;GO:0010628;GO:0010629;GO:0030154;GO:0031065;GO:0032868;GO:0042803;GO:0043372;GO:0043377;GO:0046628;GO:0046872;GO:0051141;GO:0060850;GO:0072615;GO:0090336;GO:0120162;GO:1990845;GO:2000640;GO:0000122;GO:…	K10494	-	COG5048	R	zinc finger and BTB domain containing 7B[Source:HGNC Symbol;Acc:HGNC:18668]	51043	O15156
ENSG00000163884	3	126342635	126357442	-	2848	KLF15	GO:0000977;GO:0000978;GO:0000981;GO:0000981;GO:0001228;GO:0001678;GO:0003676;GO:0003677;GO:0003677;GO:0003700;GO:0005515;GO:0005515;GO:0005634;GO:0005634;GO:0005634;GO:0006357;GO:0010001;GO:0010468;GO:0014898;GO:0032868;GO:0044212;GO:0044212;GO:0045893;GO:0045944;GO:0046326;GO:0046872;GO:0072112;GO:0072112;GO:1901653;GO:2000757;GO:2000757;	K09210	-	COG5048	R	Kruppel like factor 15 [Source:HGNCSymbol;Acc:HGNC:14536]	28999	Q9UIH9
ENSG00000164362	5	1253147	1295069	-	4602	TERT	GO:0000049;GO:0000333;GO:0000333;GO:0000333;GO:0000723;GO:0000781;GO:0000783;GO:0000784;GO:0001172;GO:0001223;GO:0001223;GO:0003677;GO:0003677;GO:0003677;GO:0003720;GO:0003720;GO:0003720;GO:0003720;GO:0003721;GO:0003721;GO:0003721;GO:0003721;GO:0003723;GO:0003723;GO:0003964;GO:0003964;GO:0003964;GO:0003968;GO:0005515;GO:0005515;GO:0005515;GO:0005515;GO:0005634;GO:0005634;GO:0005634;GO:0005634;GO:…	K11126	EC:2.7.7.49	NOG276584	-	telomerase reverse transcriptase [Source:HGNCSymbol;Acc:HGNC:11730]	7015	O14746
ENSG00000164850	7	1082208	1093815	+	3149	GPER1	GO:0000139;GO:0001934;GO:0001956;GO:0002376;GO:0002695;GO:0003682;GO:0004930;GO:0004930;GO:0004930;GO:0005496;GO:0005515;GO:0005634;GO:0005635;GO:0005737;GO:0005739;GO:0005768;GO:0005769;GO:0005783;GO:0005789;GO:0005794;GO:0005794;GO:0005802;GO:0005856;GO:0005886;GO:0005886;GO:0005887;GO:0006915;GO:0006954;GO:0007049;GO:0007165;GO:0007186;GO:0007186;GO:0007186;GO:0007186;GO:0007186;GO:0007189;GO:…	K04246	-	NOG151076	S	G protein-coupled estrogen receptor 1 [Source:HGNCSymbol;Acc:HGNC:4485]	2852	Q99527;A0A024R849;Q63ZY2
ENSG00000168913	9	34521040	34523041	-	1082	ENHO	GO:0005179;GO:0005576;GO:0005886;GO:0008286;GO:0008610;GO:0010469;GO:0010604;GO:0030073;GO:0042593;GO:0043170;GO:0045747;GO:0046889;GO:0051353;GO:1905636;	-	-	NOG256084	-	energy homeostasis associated [Source:HGNCSymbol;Acc:HGNC:24838]	375704	Q6UWT2
ENSG00000171388	X	129645259	129654937	-	3205	APLN	GO:0001525;GO:0002026;GO:0005102;GO:0005179;GO:0005179;GO:0005576;GO:0005576;GO:0005615;GO:0005615;GO:0005615;GO:0006955;GO:0007165;GO:0007165;GO:0007186;GO:0007275;GO:0007369;GO:0007595;GO:0007631;GO:0008284;GO:0010469;GO:0010629;GO:0031652;GO:0031704;GO:0031704;GO:0031704;GO:0040037;GO:0042327;GO:0042756;GO:0042756;GO:0042803;GO:0043576;GO:0045776;GO:0045776;GO:0045823;GO:0045823;GO:0045906;GO:…	K05225	-	NOG86365	-	apelin [Source:HGNC Symbol;Acc:HGNC:16665]	8862	Q9ULZ1
ENSG00000171604	5	139647299	139683882	+	3852	CXXC5	GO:0000122;GO:0003677;GO:0005515;GO:0005634;GO:0005654;GO:0005654;GO:0005737;GO:0005829;GO:0008134;GO:0008270;GO:0043123;GO:0043565;GO:0046872;GO:0000122;GO:0003677;GO:0005515;GO:0005634;GO:0005654;GO:0005654;GO:0005737;GO:0005829;GO:0008134;GO:0008270;GO:0043123;GO:0043565;GO:0046872;GO:0005654;GO:0005829;GO:0005654;GO:0005829;	K22760	-	NOG87017	S	CXXC finger protein 5 [Source:HGNCSymbol;Acc:HGNC:26943]	51523	Q7LFL8
ENSG00000179148	17	8095900	8119047	-	3760	ALOXE3	GO:0016491;GO:0016702;GO:0046872;GO:0046872;GO:0051213;GO:0055114;GO:0055114;GO:0005506;GO:0005515;GO:0005737;GO:0005829;GO:0006629;GO:0006631;GO:0006665;GO:0016491;GO:0016702;GO:0016829;GO:0016853;GO:0019233;GO:0019369;GO:0019372;GO:0019372;GO:0035357;GO:0043651;GO:0045444;GO:0046513;GO:0046872;GO:0046872;GO:0051120;GO:0051120;GO:0051122;GO:0051213;GO:0055114;GO:0055114;GO:0061436;GO:0005506;GO:…	K18684	-	NOG69653	-	arachidonate lipoxygenase 3 [Source:HGNCSymbol;Acc:HGNC:13743]	59344	Q9BYJ1
ENSG00000180739	19	10512742	10517931	-	2806	S1PR5	GO:0003376;GO:0004930;GO:0004930;GO:0004930;GO:0005886;GO:0005886;GO:0007165;GO:0007186;GO:0007186;GO:0007186;GO:0016020;GO:0016021;GO:0016021;GO:0016021;GO:0038036;GO:0045664;GO:0003376;GO:0004930;GO:0007186;GO:0016020;GO:0016021;GO:0016021;GO:0038036;GO:0003376;GO:0004930;GO:0004930;GO:0005886;GO:0005886;GO:0007165;GO:0007186;GO:0007186;GO:0007186;GO:0016020;GO:0016021;GO:0016021;GO:0038036;GO:…	K04295	-	NOG135858	S	sphingosine-1-phosphate receptor 5 [Source:HGNCSymbol;Acc:HGNC:14299]	53637	Q9H228
ENSG00000183691	17	56593699	56595590	+	1892	NOG	GO:0000122;GO:0000122;GO:0001501;GO:0001501;GO:0001649;GO:0001649;GO:0001649;GO:0001649;GO:0001655;GO:0001657;GO:0001701;GO:0001706;GO:0001707;GO:0001837;GO:0001837;GO:0001837;GO:0001839;GO:0001843;GO:0003149;GO:0003149;GO:0003151;GO:0003151;GO:0003203;GO:0003203;GO:0003223;GO:0003223;GO:0005515;GO:0005515;GO:0005576;GO:0005576;GO:0005615;GO:0005615;GO:0005615;GO:0005615;GO:0007275;GO:0007389;GO:…	K04658	-	NOG42124	-	noggin [Source:HGNC Symbol;Acc:HGNC:7866]	9241	Q13253
ENSG00000184574	12	6618835	6636447	-	3258	LPAR5	GO:0003674;GO:0004930;GO:0004930;GO:0005575;GO:0005886;GO:0005886;GO:0007165;GO:0007186;GO:0007186;GO:0007186;GO:0008150;GO:0016020;GO:0016021;GO:0016021;GO:0003674;GO:0004930;GO:0004930;GO:0005575;GO:0005886;GO:0005886;GO:0007165;GO:0007186;GO:0007186;GO:0007186;GO:0008150;GO:0016020;GO:0016021;GO:0016021;	K08390	-	NOG146804	S	lysophosphatidic acid receptor 5 [Source:HGNCSymbol;Acc:HGNC:13307]	57121	Q9H1C0;Q5KU18
ENSG00000204103	20	40685848	40689240	-	3393	MAFB	GO:0000978;GO:0000978;GO:0000981;GO:0000981;GO:0001228;GO:0001228;GO:0003677;GO:0003677;GO:0003677;GO:0003700;GO:0003700;GO:0005515;GO:0005515;GO:0005634;GO:0005634;GO:0005634;GO:0005634;GO:0005634;GO:0005634;GO:0005667;GO:0006355;GO:0006355;GO:0006357;GO:0007379;GO:0007423;GO:0007585;GO:0008134;GO:0021571;GO:0021572;GO:0021599;GO:0021599;GO:0033077;GO:0035284;GO:0042472;GO:0042803;GO:0043565;GO:…	K09036	-	NOG241084	-	MAF bZIP transcription factor B [Source:HGNCSymbol;Acc:HGNC:6408]	9935	Q9Y5Q3
ENSG00000166963	15	43510958	43531620	+	10629	MAP1A	GO:0000226;GO:0005874;GO:0008017;GO:0000226;GO:0000226;GO:0000226;GO:0003779;GO:0003779;GO:0005198;GO:0005515;GO:0005515;GO:0005737;GO:0005737;GO:0005829;GO:0005856;GO:0005874;GO:0005874;GO:0005874;GO:0005875;GO:0005875;GO:0007409;GO:0007613;GO:0008017;GO:0008017;GO:0008017;GO:0008093;GO:0008306;GO:0015631;GO:0015631;GO:0016358;GO:0030424;GO:0030425;GO:0030425;GO:0031114;GO:0032435;GO:0042995;GO:…	K10429	-	NOG12793	-	microtubule associated protein 1A [Source:HGNCSymbol;Acc:HGNC:6835]	4130	P78559;Q504X9
ENSG00000139445	12	109277979	109309220	-	3471	FOXN4	GO:0003677;GO:0003700;GO:0005634;GO:0006355;GO:0043565;GO:0000981;GO:0001158;GO:0001947;GO:0003677;GO:0003682;GO:0003700;GO:0003700;GO:0005515;GO:0005634;GO:0006355;GO:0006355;GO:0006357;GO:0007275;GO:0007399;GO:0008016;GO:0010842;GO:0035881;GO:0036302;GO:0043565;GO:0045893;GO:0060579;GO:0000981;GO:0001158;GO:0001158;GO:0001947;GO:0003677;GO:0003682;GO:0003682;GO:0003700;GO:0003700;GO:0003700;GO:…	K09407	-	COG5025	K	forkhead box N4 [Source:HGNCSymbol;Acc:HGNC:21399]	121643	Q96NZ1;A6H901
ENSG00000205683	14	72619296	72894116	-	6889	DPF3	GO:0000123;GO:0000790;GO:0003676;GO:0004402;GO:0005634;GO:0005634;GO:0005654;GO:0006325;GO:0007399;GO:0007399;GO:0008150;GO:0008270;GO:0008270;GO:0016573;GO:0042393;GO:0045892;GO:0045944;GO:0046872;GO:0071565;GO:0071565;GO:0071565;GO:0000123;GO:0000790;GO:0003676;GO:0004402;GO:0005634;GO:0005634;GO:0005654;GO:0006325;GO:0007399;GO:0007399;GO:0008150;GO:0008270;GO:0008270;GO:0016573;GO:0042393;GO:…	K22198	-	NOG271547	-	double PHD fingers 3 [Source:HGNCSymbol;Acc:HGNC:17427]	8110	Q92784
ENSG00000069812	1	6412418	6424670	-	5407	HES2	GO:0000977;GO:0000981;GO:0001227;GO:0001756;GO:0003677;GO:0003677;GO:0003714;GO:0005634;GO:0005634;GO:0006355;GO:0007219;GO:0008134;GO:0008134;GO:0030154;GO:0043565;GO:0046983;GO:0050767;GO:1990837;GO:0000977;GO:0000981;GO:0001227;GO:0001756;GO:0003677;GO:0003677;GO:0003714;GO:0005634;GO:0005634;GO:0006355;GO:0007219;GO:0008134;GO:0008134;GO:0030154;GO:0043565;GO:0046983;GO:0050767;GO:1990837;GO:…	K09087	-	NOG259850	-	hes family bHLH transcription factor 2 [Source:HGNCSymbol;Acc:HGNC:16005]	54626	Q9Y543
ENSG00000102984	16	71859680	71895336	-	3402	ZNF821	GO:0003676;GO:0003676;GO:0003677;GO:0003700;GO:0005515;GO:0005634;GO:0005654;GO:0044212;GO:0045944;GO:0046872;GO:0003676;GO:0003676;GO:0003677;GO:0003700;GO:0005515;GO:0005634;GO:0005654;GO:0044212;GO:0045944;GO:0046872;GO:0003676;GO:0003676;GO:0003676;	-	-	NOG247293	-	zinc finger protein 821 [Source:HGNCSymbol;Acc:HGNC:28043]	55565	O75541
ENSG00000180884	19	34956354	34964049	-	4234	ZNF792	GO:0000981;GO:0003676;GO:0003677;GO:0005515;GO:0005634;GO:0006355;GO:0006357;GO:0042802;GO:0046872;GO:0003676;	K09228	-	COG5048	R	zinc finger protein 792 [Source:HGNCSymbol;Acc:HGNC:24751]	126375	Q3KQV3
ENSG00000186487	2	1789113	2331664	-	35151	MYT1L	GO:0000122;GO:0001227;GO:0003700;GO:0005634;GO:0006357;GO:0007399;GO:0030182;GO:0048663;GO:0048665;GO:0048666;GO:0003700;GO:0005634;GO:0006355;GO:0008270;GO:0000122;GO:0000977;GO:0000981;GO:0001227;GO:0001227;GO:0001228;GO:0003677;GO:0003700;GO:0005634;GO:0005634;GO:0005634;GO:0005694;GO:0006355;GO:0006357;GO:0007275;GO:0007399;GO:0008270;GO:0030154;GO:0030182;GO:0045944;GO:0046872;GO:0048663;GO:…	-	-	NOG329034	-	myelin transcription factor 1 like [Source:HGNCSymbol;Acc:HGNC:7623]	23040	Q9UL68
ENSG00000204060	1	41361922	41383590	+	2398	FOXO6	GO:0000122;GO:0000981;GO:0000981;GO:0000981;GO:0000981;GO:0003677;GO:0003700;GO:0003700;GO:0005515;GO:0005634;GO:0005634;GO:0005634;GO:0005634;GO:0005737;GO:0005737;GO:0005737;GO:0005737;GO:0006355;GO:0006357;GO:0006357;GO:0007613;GO:0008134;GO:0008286;GO:0042593;GO:0043565;GO:0043565;GO:0045944;GO:0060999;GO:0060999;	-	-	-	-	forkhead box O6 [Source:HGNCSymbol;Acc:HGNC:24814]	-	-
ENSG00000072195	2	219434846	219498287	+	17910	SPEG	GO:0000166;GO:0004672;GO:0004672;GO:0004674;GO:0004674;GO:0005515;GO:0005524;GO:0005524;GO:0005634;GO:0005634;GO:0005634;GO:0006468;GO:0007517;GO:0008285;GO:0016301;GO:0016310;GO:0016740;GO:0030154;GO:0042692;GO:0042692;GO:0072358;GO:0004674;GO:0005524;GO:0006468;GO:0004674;GO:0005524;GO:0006468;GO:0004674;GO:0005524;GO:0006468;GO:0004674;GO:0005524;GO:0006468;GO:0004674;GO:0005524;GO:0006468;GO:…	K08809	EC:2.7.11.1	COG0515	T	SPEG complex locus [Source:HGNCSymbol;Acc:HGNC:16901]	10290	Q15772
ENSG00000158859	1	161184308	161199056	-	10334	ADAMTS4	GO:0001501;GO:0002020;GO:0004222;GO:0004222;GO:0005515;GO:0005576;GO:0005576;GO:0005615;GO:0006508;GO:0006508;GO:0006508;GO:0008233;GO:0008233;GO:0008237;GO:0008237;GO:0008237;GO:0016607;GO:0016787;GO:0022617;GO:0046872;GO:0062023;GO:0006508;GO:0008237;GO:0016020;GO:0016021;GO:0016607;	K07764	EC:3.4.24.82	NOG271890	-	ADAM metallopeptidase with thrombospondin type 1motif 4 [Source:HGNC Symbol;Acc:HGNC:220]	9507	O75173

## Sheet: 0h_vs_6h.DESeq.Up
ID	Chromosome	Start Site	End Site	Direction	Length	Name	GO	KEGG	EC	eggNOG Class	eggNOG	Description	NCBI	UniProtID
ENSG00000069399	19	44747705	44760044	+	19	3242	BCL3	GO:0000060;GO:0002268;GO:0002315;GO:0002455;GO:0002467;GO:0003677;GO:0003700;GO:0005515;GO:0005515;GO:0005634;GO:0005654;GO:0005737;GO:0005829;GO:0005886;GO:0006351;GO:0006974;GO:0007249;GO:0008134;GO:0009615;GO:0010225;GO:0019730;GO:0030198;GO:0030330;GO:0030496;GO:0030674;GO:0032729;GO:0032991;GO:0032996;GO:0033257;GO:0042088;GO:0042536;GO:0042742;GO:0042771;GO:0042832;GO:0042981;GO:0043066;GO:…	K09258	-	COG0666	R	B cell CLL/lymphoma 3 [Source:HGNCSymbol;Acc:HGNC:998]	602
ENSG00000075426	2	28392448	28417312	+	2	7157	FOSL2	GO:0000977;GO:0000978;GO:0000981;GO:0001228;GO:0003677;GO:0003677;GO:0003700;GO:0003700;GO:0005515;GO:0005634;GO:0005634;GO:0005634;GO:0005654;GO:0006355;GO:0006357;GO:0006357;GO:0008219;GO:0045944;GO:0000977;GO:0000977;GO:0000978;GO:0000981;GO:0001228;GO:0003334;GO:0003677;GO:0003677;GO:0003682;GO:0003700;GO:0003700;GO:0005515;GO:0005634;GO:0005634;GO:0005634;GO:0005634;GO:0005654;GO:0006355;GO:…	K09030	-	NOG301361	-	FOS like 2, AP-1 transcription factor subunit[Source:HGNC Symbol;Acc:HGNC:3798]	2355
ENSG00000077150	10	102394110	102402529	+	10	4484	NFKB2	GO:0000978;GO:0000981;GO:0001228;GO:0003677;GO:0003677;GO:0003700;GO:0003700;GO:0003713;GO:0005515;GO:0005515;GO:0005634;GO:0005634;GO:0005654;GO:0005737;GO:0005737;GO:0005829;GO:0005829;GO:0006355;GO:0006355;GO:0007165;GO:0032481;GO:0033257;GO:0038061;GO:0045944;GO:0048511;GO:0051092;GO:0000978;GO:0000981;GO:0001228;GO:0002268;GO:0002467;GO:0003677;GO:0003677;GO:0003700;GO:0003700;GO:0003713;GO:…	K04469	-	COG0666	R	nuclear factor kappa B subunit 2 [Source:HGNCSymbol;Acc:HGNC:7795]	4791
ENSG00000109320	4	102501329	102617302	+	4	6257	NFKB1	GO:0000122;GO:0000122;GO:0000122;GO:0000976;GO:0000977;GO:0000980;GO:0000981;GO:0001227;GO:0001228;GO:0001818;GO:0002223;GO:0003677;GO:0003677;GO:0003677;GO:0003682;GO:0003700;GO:0003700;GO:0005515;GO:0005515;GO:0005515;GO:0005576;GO:0005634;GO:0005634;GO:0005634;GO:0005634;GO:0005634;GO:0005654;GO:0005654;GO:0005737;GO:0005737;GO:0005737;GO:0005739;GO:0005829;GO:0005829;GO:0005829;GO:0006355;GO:…	K02580	-	COG0666	R	nuclear factor kappa B subunit 1 [Source:HGNCSymbol;Acc:HGNC:7794]	4790
ENSG00000116016	2	46293667	46386703	+	2	7302	EPAS1	GO:0003700;GO:0005634;GO:0005634;GO:0005667;GO:0005737;GO:0006355;GO:0046983;GO:0000981;GO:0000981;GO:0001228;GO:0001525;GO:0001525;GO:0001666;GO:0001666;GO:0001892;GO:0001974;GO:0002027;GO:0003677;GO:0003677;GO:0003677;GO:0003700;GO:0003700;GO:0005515;GO:0005515;GO:0005515;GO:0005634;GO:0005634;GO:0005634;GO:0005634;GO:0005654;GO:0005667;GO:0005667;GO:0005667;GO:0005737;GO:0005737;GO:0005829;GO:…	K09095	-	NOG289264	-	endothelial PAS domain protein 1 [Source:HGNCSymbol;Acc:HGNC:3374]	2034
ENSG00000119508	9	99821855	99866891	+	9	6314	NR4A3	GO:0000122;GO:0000977;GO:0000978;GO:0000981;GO:0001228;GO:0001228;GO:0003677;GO:0003677;GO:0003700;GO:0003707;GO:0003707;GO:0004879;GO:0004879;GO:0005515;GO:0005515;GO:0005634;GO:0005634;GO:0005634;GO:0005654;GO:0005667;GO:0006355;GO:0006367;GO:0007369;GO:0008270;GO:0009444;GO:0010613;GO:0010828;GO:0019901;GO:0030522;GO:0032765;GO:0035259;GO:0035497;GO:0035726;GO:0038097;GO:0042629;GO:0042803;GO:…	K08559	-	NOG245120	-	nuclear receptor subfamily 4 group A member 3[Source:HGNC Symbol;Acc:HGNC:7982]	8013
ENSG00000120738	5	138465490	138469315	+	5	3138	EGR1	GO:0000122;GO:0000976;GO:0000977;GO:0000977;GO:0000981;GO:0000981;GO:0000981;GO:0001228;GO:0001666;GO:0001666;GO:0002931;GO:0002931;GO:0003676;GO:0003677;GO:0003677;GO:0003700;GO:0003700;GO:0005515;GO:0005515;GO:0005634;GO:0005634;GO:0005634;GO:0005634;GO:0005654;GO:0005654;GO:0005737;GO:0005737;GO:0006355;GO:0006357;GO:0006366;GO:0008270;GO:0009749;GO:0010385;GO:0010628;GO:0030217;GO:0030509;GO:…	K09203	-	COG5048	R	early growth response 1 [Source:HGNCSymbol;Acc:HGNC:3238]	1958
ENSG00000122877	10	62811996	62919900	-	10	3689	EGR2	GO:0000978;GO:0000981;GO:0000981;GO:0001102;GO:0001102;GO:0001228;GO:0003676;GO:0003677;GO:0003677;GO:0003682;GO:0003682;GO:0003700;GO:0003700;GO:0005515;GO:0005634;GO:0005634;GO:0005634;GO:0005634;GO:0005654;GO:0005737;GO:0005737;GO:0006355;GO:0006357;GO:0006366;GO:0006366;GO:0006611;GO:0006611;GO:0007420;GO:0007422;GO:0007611;GO:0007622;GO:0008045;GO:0014037;GO:0016740;GO:0016925;GO:0021569;GO:…	K12496	-	COG5048	R	early growth response 2 [Source:HGNCSymbol;Acc:HGNC:3239]	1959
ENSG00000123358	12	52022832	52059507	+	12	7295	NR4A1	GO:0003677;GO:0004879;GO:0005634;GO:0006355;GO:0030522;GO:0000977;GO:0000978;GO:0000981;GO:0001228;GO:0001228;GO:0001938;GO:0002042;GO:0003677;GO:0003677;GO:0003677;GO:0003677;GO:0003700;GO:0003707;GO:0004879;GO:0004879;GO:0005515;GO:0005634;GO:0005634;GO:0005634;GO:0005634;GO:0005634;GO:0005654;GO:0005667;GO:0005737;GO:0005829;GO:0006355;GO:0006367;GO:0007165;GO:0008270;GO:0030522;GO:0031965;GO:…	K04465	-	NOG245120	-	nuclear receptor subfamily 4 group A member 1[Source:HGNC Symbol;Acc:HGNC:7980]	3164
ENSG00000128342	22	30240447	30246851	-	22	3969	LIF	GO:0001974;GO:0005102;GO:0005125;GO:0005125;GO:0005125;GO:0005125;GO:0005125;GO:0005125;GO:0005146;GO:0005146;GO:0005146;GO:0005146;GO:0005515;GO:0005576;GO:0005576;GO:0005576;GO:0005615;GO:0005615;GO:0005615;GO:0005829;GO:0006955;GO:0007260;GO:0007275;GO:0007566;GO:0008083;GO:0008083;GO:0008083;GO:0008083;GO:0008083;GO:0008284;GO:0008284;GO:0008284;GO:0008284;GO:0008284;GO:0008285;GO:0010469;GO:…	K05419	-	NOG45686	-	LIF, interleukin 6 family cytokine [Source:HGNCSymbol;Acc:HGNC:6596]	3976
ENSG00000144655	3	39141855	39154562	-	3	3214	CSRNP1	GO:0000981;GO:0001228;GO:0003674;GO:0003677;GO:0003700;GO:0003700;GO:0005515;GO:0005634;GO:0005634;GO:0006355;GO:0006915;GO:0009791;GO:0043565;GO:0045944;GO:0045944;GO:0048008;GO:0048705;GO:0060021;GO:0060325;GO:0000981;GO:0003674;GO:0003677;GO:0003700;GO:0005515;GO:0005634;GO:0006915;GO:0045944;	K17494	-	NOG150539	S	cysteine and serine rich nuclear protein 1[Source:HGNC Symbol;Acc:HGNC:14300]	64651
ENSG00000153162	6	7726797	7881422	+	6	2780	BMP6	GO:0000122;GO:0000122;GO:0001501;GO:0001503;GO:0001503;GO:0001649;GO:0001649;GO:0001654;GO:0001822;GO:0001938;GO:0001958;GO:0003323;GO:0005125;GO:0005125;GO:0005160;GO:0005576;GO:0005615;GO:0005615;GO:0005615;GO:0005737;GO:0006879;GO:0006879;GO:0006954;GO:0006955;GO:0007275;GO:0008083;GO:0008083;GO:0008083;GO:0008284;GO:0010039;GO:0010469;GO:0010862;GO:0010862;GO:0010862;GO:0010862;GO:0014823;GO:…	K16620	-	NOG272883	-	bone morphogenetic protein 6 [Source:HGNCSymbol;Acc:HGNC:1073]	654
ENSG00000160888	19	13150415	13154908	+	19	3072	IER2	GO:0000977;GO:0001228;GO:0003677;GO:0005634;GO:0005654;GO:0005737;GO:0030182;GO:0045944;GO:0048870;GO:0071774;GO:0000977;GO:0001228;GO:0003677;GO:0005634;GO:0005654;GO:0005737;GO:0030182;GO:0045944;GO:0048870;GO:0071774;GO:0000977;GO:0001228;GO:0003677;GO:0005634;GO:0005654;GO:0005737;GO:0005737;GO:0030182;GO:0045944;GO:0048870;GO:0071774;	-	-	NOG40154	-	immediate early response 2 [Source:HGNCSymbol;Acc:HGNC:28871]	9592
ENSG00000163874	1	37474552	37484379	+	1	3121	ZC3H12A	GO:0000294;GO:0000294;GO:0000932;GO:0001525;GO:0001933;GO:0001933;GO:0002230;GO:0002376;GO:0002757;GO:0003677;GO:0003682;GO:0003723;GO:0003729;GO:0003730;GO:0003730;GO:0004518;GO:0004518;GO:0004519;GO:0004521;GO:0004521;GO:0004532;GO:0004532;GO:0004540;GO:0004843;GO:0005515;GO:0005515;GO:0005634;GO:0005634;GO:0005654;GO:0005737;GO:0005737;GO:0005737;GO:0005783;GO:0005791;GO:0005791;GO:0005856;GO:…	K18668	EC:3.1.-.-	NOG259385	-	zinc finger CCCH-type containing 12A [Source:HGNCSymbol;Acc:HGNC:26259]	80149
ENSG00000170345	14	75278774	75282230	+	14	3238	FOS	GO:0000978;GO:0000978;GO:0000979;GO:0000981;GO:0001102;GO:0001228;GO:0001661;GO:0003677;GO:0003677;GO:0003677;GO:0003677;GO:0003682;GO:0003690;GO:0003700;GO:0003700;GO:0003700;GO:0003700;GO:0003700;GO:0005515;GO:0005634;GO:0005634;GO:0005634;GO:0005634;GO:0005634;GO:0005634;GO:0005634;GO:0005654;GO:0005654;GO:0005667;GO:0005667;GO:0005737;GO:0005783;GO:0005829;GO:0006306;GO:0006355;GO:0006355;GO:…	K04379	-	NOG258795	-	Fos proto-oncogene, AP-1 transcription factorsubunit [Source:HGNC Symbol;Acc:HGNC:3796]	2353
ENSG00000170485	2	100820152	100996829	+	2	12491	NPAS2	GO:0000980;GO:0000981;GO:0003677;GO:0003677;GO:0003700;GO:0003700;GO:0005515;GO:0005634;GO:0005634;GO:0005654;GO:0005654;GO:0005667;GO:0005667;GO:0005737;GO:0005829;GO:0005829;GO:0006355;GO:0006974;GO:0007417;GO:0007623;GO:0019216;GO:0032922;GO:0045739;GO:0045893;GO:0045944;GO:0046872;GO:0046983;GO:0048511;GO:0051775;GO:0051879;GO:0060548;GO:2001020;GO:0003700;GO:0005634;GO:0005634;GO:0005667;GO:…	K09026	-	NOG300360	-	neuronal PAS domain protein 2 [Source:HGNCSymbol;Acc:HGNC:7895]	4862
ENSG00000171223	19	12791496	12793315	+	19	1820	JUNB	GO:0000122;GO:0000785;GO:0000790;GO:0000977;GO:0000978;GO:0000978;GO:0000981;GO:0000981;GO:0001228;GO:0001570;GO:0001649;GO:0001701;GO:0001829;GO:0003677;GO:0003677;GO:0003677;GO:0003677;GO:0003700;GO:0003713;GO:0003713;GO:0003714;GO:0005515;GO:0005634;GO:0005654;GO:0005654;GO:0005654;GO:0005667;GO:0006355;GO:0006355;GO:0006357;GO:0006357;GO:0008134;GO:0009314;GO:0009612;GO:0009987;GO:0010033;GO:…	K09028	-	NOG283376	-	JunB proto-oncogene, AP-1 transcription factorsubunit [Source:HGNC Symbol;Acc:HGNC:6205]	3726
ENSG00000175592	11	65892049	65900573	-	11	1887	FOSL1	GO:0000978;GO:0000978;GO:0000981;GO:0003677;GO:0003677;GO:0003700;GO:0003700;GO:0005515;GO:0005634;GO:0005634;GO:0005634;GO:0005634;GO:0005654;GO:0006355;GO:0006357;GO:0006357;GO:0006366;GO:0006935;GO:0006968;GO:0008284;GO:0009615;GO:0061614;GO:2000144;GO:0000977;GO:0000978;GO:0000978;GO:0000978;GO:0000981;GO:0001228;GO:0001701;GO:0003677;GO:0003677;GO:0003677;GO:0003700;GO:0003700;GO:0005515;GO:…	K04502	-	NOG252534	-	FOS like 1, AP-1 transcription factor subunit[Source:HGNC Symbol;Acc:HGNC:13718]	8061
ENSG00000175832	17	43527844	43579620	-	17	3607	ETV4	GO:0000978;GO:0000981;GO:0000981;GO:0001228;GO:0003677;GO:0003700;GO:0005515;GO:0005634;GO:0005634;GO:0005634;GO:0005654;GO:0005730;GO:0006355;GO:0006357;GO:0030154;GO:0043565;GO:0045944;GO:0000978;GO:0000981;GO:0000981;GO:0001228;GO:0003677;GO:0003700;GO:0005515;GO:0005634;GO:0005634;GO:0005634;GO:0005654;GO:0005730;GO:0006355;GO:0006357;GO:0030154;GO:0043565;GO:0045944;GO:0000978;GO:0000981;GO:…	K15592	-	NOG258471	-	ETS variant 4 [Source:HGNC Symbol;Acc:HGNC:3493]	2118
ENSG00000197019	19	40421592	40426025	-	19	2114	SERTAD1	GO:0000079;GO:0005515;GO:0005634;GO:0005634;GO:0005737;GO:0005737;GO:0008284;GO:0030308;GO:0045893;GO:0045944;	-	-	NOG41149	R	SERTA domain containing 1 [Source:HGNCSymbol;Acc:HGNC:17932]	29950
ENSG00000232810	6	31575567	31578336	+	6	1676	TNF	GO:0000060;GO:0000122;GO:0000122;GO:0000122;GO:0000165;GO:0000185;GO:0000187;GO:0000977;GO:0001774;GO:0001819;GO:0001891;GO:0001891;GO:0001932;GO:0001934;GO:0001934;GO:0001937;GO:0002020;GO:0002020;GO:0002439;GO:0002740;GO:0002876;GO:0002925;GO:0005125;GO:0005125;GO:0005125;GO:0005164;GO:0005164;GO:0005164;GO:0005164;GO:0005515;GO:0005515;GO:0005576;GO:0005576;GO:0005615;GO:0005615;GO:0005615;GO:…	K03156	-	NOG40413	-	tumor necrosis factor [Source:HGNCSymbol;Acc:HGNC:11892]	7124
ENSG00000244405	3	186046308	186110318	-	3	5802	ETV5	GO:0000977;GO:0000981;GO:0000981;GO:0001228;GO:0003677;GO:0003677;GO:0003700;GO:0003700;GO:0003700;GO:0005515;GO:0005634;GO:0005634;GO:0005634;GO:0005654;GO:0005886;GO:0006355;GO:0006357;GO:0007274;GO:0007626;GO:0030154;GO:0034599;GO:0043565;GO:0044212;GO:0045666;GO:0045893;GO:0045944;GO:0048133;GO:0050807;GO:0060252;GO:0060762;GO:0071340;GO:0000977;GO:0000981;GO:0000981;GO:0001228;GO:0003677;GO:…	K15593	-	NOG258471	-	ETS variant 5 [Source:HGNC Symbol;Acc:HGNC:3494]	2119
ENSG00000034152	17	21284672	21315240	+	17	3783	MAP2K3	GO:0000165;GO:0000166;GO:0000187;GO:0000187;GO:0000187;GO:0004672;GO:0004674;GO:0004674;GO:0004708;GO:0004708;GO:0004708;GO:0004713;GO:0005515;GO:0005515;GO:0005524;GO:0005524;GO:0005654;GO:0005737;GO:0005829;GO:0006468;GO:0006954;GO:0007165;GO:0016020;GO:0016301;GO:0016310;GO:0016740;GO:0018108;GO:0019901;GO:0019901;GO:0023014;GO:0031098;GO:0032147;GO:0035924;GO:0038066;GO:0042035;GO:0043536;GO:…	K04432	EC:2.7.12.2	COG0515	T	mitogen-activated protein kinase kinase 3[Source:HGNC Symbol;Acc:HGNC:6843]	5606
ENSG00000056558	9	120902393	120929173	-	9	6449	TRAF1	GO:0005164;GO:0005164;GO:0005164;GO:0005515;GO:0005515;GO:0005737;GO:0005829;GO:0006915;GO:0007165;GO:0008270;GO:0010803;GO:0031625;GO:0031625;GO:0031996;GO:0031996;GO:0032991;GO:0042802;GO:0042981;GO:0051092;GO:0065003;GO:2001236;GO:0005164;GO:0005164;GO:0005164;GO:0005515;GO:0005515;GO:0005737;GO:0005829;GO:0006915;GO:0007165;GO:0008270;GO:0010803;GO:0031625;GO:0031625;GO:0031996;GO:0031996;GO:…	K03172	-	NOG264247	-	TNF receptor associated factor 1 [Source:HGNCSymbol;Acc:HGNC:12031]	7185
ENSG00000104856	19	45001430	45038198	+	19	3035	RELB	GO:0000122;GO:0000977;GO:0000980;GO:0000980;GO:0000981;GO:0000981;GO:0002223;GO:0003677;GO:0003677;GO:0003677;GO:0003677;GO:0003682;GO:0003700;GO:0003700;GO:0003714;GO:0005515;GO:0005634;GO:0005634;GO:0005634;GO:0005634;GO:0005634;GO:0005654;GO:0005654;GO:0005654;GO:0005737;GO:0005737;GO:0005813;GO:0005815;GO:0005829;GO:0005829;GO:0005829;GO:0005829;GO:0005856;GO:0006355;GO:0006357;GO:0006954;GO:…	K09253	-	NOG119056	S	RELB proto-oncogene, NF-kB subunit [Source:HGNCSymbol;Acc:HGNC:9956]	5971
ENSG00000108551	17	17494437	17496395	-	17	1748	RASD1	GO:0000166;GO:0003924;GO:0003924;GO:0005515;GO:0005525;GO:0005525;GO:0005634;GO:0005634;GO:0005737;GO:0005737;GO:0005886;GO:0007165;GO:0007165;GO:0007186;GO:0007263;GO:0016020;GO:0016020;GO:0016529;GO:0045892;GO:0048471;GO:0048471;GO:0000166;GO:0003924;GO:0003924;GO:0005515;GO:0005525;GO:0005525;GO:0005634;GO:0005737;GO:0005886;GO:0007165;GO:0007165;GO:0007186;GO:0016020;GO:0016020;GO:0048471;	K07843	-	COG1100	R	ras related dexamethasone induced 1 [Source:HGNCSymbol;Acc:HGNC:15828]	51655
ENSG00000118503	6	137867188	137883312	+	6	5051	TNFAIP3	GO:0001922;GO:0001922;GO:0002020;GO:0002237;GO:0002237;GO:0002634;GO:0002634;GO:0002677;GO:0003677;GO:0003677;GO:0003824;GO:0004842;GO:0004843;GO:0004843;GO:0004843;GO:0005515;GO:0005515;GO:0005515;GO:0005634;GO:0005634;GO:0005634;GO:0005737;GO:0005737;GO:0005737;GO:0005764;GO:0005829;GO:0006508;GO:0006915;GO:0006954;GO:0007010;GO:0008152;GO:0008233;GO:0008234;GO:0008270;GO:0010803;GO:0016477;GO:…	K11859	EC:3.4.19.12	NOG248343	-	TNF alpha induced protein 3 [Source:HGNCSymbol;Acc:HGNC:11896]	7128
ENSG00000118515	6	134169246	134318112	-	6	9992	SGK1	GO:0000166;GO:0001558;GO:0004672;GO:0004672;GO:0004674;GO:0004674;GO:0004674;GO:0004674;GO:0004674;GO:0004712;GO:0005246;GO:0005515;GO:0005515;GO:0005524;GO:0005524;GO:0005634;GO:0005634;GO:0005737;GO:0005737;GO:0005739;GO:0005783;GO:0005789;GO:0005829;GO:0005829;GO:0005886;GO:0006468;GO:0006468;GO:0006468;GO:0006814;GO:0006915;GO:0006974;GO:0007616;GO:0008217;GO:0015459;GO:0015459;GO:0016020;GO:…	K13302	EC:2.7.11.1	COG0515	T	serum/glucocorticoid regulated kinase 1[Source:HGNC Symbol;Acc:HGNC:10810]	6446
ENSG00000124762	6	36676460	36687339	+	6	3050	CDKN1A	GO:0000079;GO:0000082;GO:0000082;GO:0000086;GO:0000307;GO:0004693;GO:0004860;GO:0004860;GO:0004861;GO:0004861;GO:0004861;GO:0004861;GO:0005515;GO:0005515;GO:0005634;GO:0005634;GO:0005634;GO:0005654;GO:0005654;GO:0005654;GO:0005730;GO:0005737;GO:0005829;GO:0006357;GO:0006367;GO:0006974;GO:0006977;GO:0006977;GO:0007049;GO:0007050;GO:0007050;GO:0007050;GO:0007265;GO:0007346;GO:0007507;GO:0008285;GO:…	K06625	-	NOG290902	-	cyclin dependent kinase inhibitor 1A [Source:HGNCSymbol;Acc:HGNC:1784]	1026
ENSG00000128016	19	39406813	39409412	+	19	2010	ZFP36	GO:0000122;GO:0000165;GO:0000288;GO:0000289;GO:0003729;GO:0005515;GO:0005634;GO:0005737;GO:0005829;GO:0006357;GO:0009611;GO:0017091;GO:0030014;GO:0035278;GO:0035556;GO:0035925;GO:0038066;GO:0043488;GO:0044344;GO:0045085;GO:0045600;GO:0045638;GO:0046872;GO:0046872;GO:0050728;GO:0050779;GO:0060213;GO:0061014;GO:0061158;GO:0070063;GO:0071222;GO:0071356;GO:0071889;GO:1900153;GO:1904246;GO:1990904;GO:…	K15308	-	COG5063	R	ZFP36 ring finger protein [Source:HGNCSymbol;Acc:HGNC:12862]	7538
ENSG00000129757	11	2883213	2885773	-	11	2478	CDKN1C	GO:0000122;GO:0001501;GO:0001822;GO:0001890;GO:0004860;GO:0004860;GO:0004861;GO:0005515;GO:0005515;GO:0005634;GO:0005634;GO:0005634;GO:0005634;GO:0005737;GO:0007049;GO:0007050;GO:0007096;GO:0007346;GO:0007568;GO:0030099;GO:0030325;GO:0030511;GO:0033673;GO:0035264;GO:0042326;GO:0042326;GO:0042551;GO:0043010;GO:0044877;GO:0045736;GO:0045892;GO:0045893;GO:0050680;GO:0055123;GO:0060065;GO:0060669;GO:…	K09993	-	NOG245842	-	cyclin dependent kinase inhibitor 1C [Source:HGNCSymbol;Acc:HGNC:1786]	1028
ENSG00000134107	3	4979116	4985323	+	3	3837	BHLHE40	GO:0000122;GO:0000977;GO:0000978;GO:0000980;GO:0000981;GO:0000981;GO:0000981;GO:0001102;GO:0001102;GO:0001227;GO:0001227;GO:0001227;GO:0001756;GO:0003677;GO:0003677;GO:0003677;GO:0003700;GO:0003714;GO:0003714;GO:0003714;GO:0005515;GO:0005515;GO:0005634;GO:0005634;GO:0005634;GO:0005634;GO:0005737;GO:0006355;GO:0006355;GO:0007219;GO:0007623;GO:0008134;GO:0009416;GO:0016604;GO:0019904;GO:0030154;GO:…	K03729	-	NOG281955	-	basic helix-loop-helix family member e40[Source:HGNC Symbol;Acc:HGNC:1046]	8553
ENSG00000146232	6	44258166	44265788	-	6	2581	NFKBIE	GO:0001650;GO:0005634;GO:0005829;GO:0001650;GO:0005515;GO:0005634;GO:0005737;GO:0005737;GO:0005794;GO:0005829;GO:0005829;GO:0042942;GO:0042994;GO:0048471;	K05872	-	COG0666	R	NFKB inhibitor epsilon [Source:HGNCSymbol;Acc:HGNC:7799]	4794
ENSG00000146592	7	28299321	28825894	+	7	11674	CREB5	GO:0000981;GO:0003676;GO:0003677;GO:0003700;GO:0003700;GO:0005515;GO:0005634;GO:0006355;GO:0006357;GO:0006366;GO:0045893;GO:0046872;GO:0070062;GO:0003676;GO:0000981;GO:0003676;GO:0003677;GO:0003700;GO:0003700;GO:0005515;GO:0005634;GO:0006355;GO:0006357;GO:0006366;GO:0045893;GO:0046872;GO:0070062;GO:0000981;GO:0003676;GO:0003677;GO:0003700;GO:0003700;GO:0005515;GO:0005634;GO:0006355;GO:0006357;GO:…	K09047	-	NOG286140	-	cAMP responsive element binding protein 5[Source:HGNC Symbol;Acc:HGNC:16844]	9586
ENSG00000198879	10	7158624	7411486	-	10	9953	SFMBT2	GO:0003714;GO:0005515;GO:0005634;GO:0005634;GO:0006355;GO:0010629;GO:0016235;GO:0016607;GO:0042393;GO:0042393;GO:0043231;GO:1903507;GO:0003714;GO:0005515;GO:0005634;GO:0005634;GO:0006355;GO:0010629;GO:0016235;GO:0016607;GO:0042393;GO:0042393;GO:0043231;GO:1903507;GO:0005634;GO:0006355;GO:0005634;GO:0006355;	-	-	NOG316861	-	Scm like with four mbt domains 2 [Source:HGNCSymbol;Acc:HGNC:20256]	57713
ENSG00000198947	X	31097677	33339441	-	X	18910	DMD	GO:0002027;GO:0002162;GO:0002162;GO:0003779;GO:0003779;GO:0003779;GO:0005200;GO:0005515;GO:0005515;GO:0005515;GO:0005737;GO:0005829;GO:0005856;GO:0005856;GO:0005886;GO:0007010;GO:0007517;GO:0008270;GO:0008307;GO:0009986;GO:0010880;GO:0010881;GO:0014809;GO:0014819;GO:0016010;GO:0016013;GO:0016020;GO:0016328;GO:0017022;GO:0017166;GO:0030018;GO:0030049;GO:0030054;GO:0030055;GO:0030175;GO:0031527;GO:…	K10366	-	COG5069	Z	dystrophin [Source:HGNC Symbol;Acc:HGNC:2928]	1756
ENSG00000178199	6	149446795	149485061	-	6	6733	ZC3H12D	GO:0000932;GO:0000932;GO:0004518;GO:0004519;GO:0005515;GO:0005634;GO:0005654;GO:0005737;GO:0016787;GO:0036464;GO:0046872;GO:0046872;GO:0061158;GO:0090305;GO:0005654;GO:0036464;	K18668	EC:3.1.-.-	NOG259385	-	zinc finger CCCH-type containing 12D [Source:HGNCSymbol;Acc:HGNC:21175]	340152
ENSG00000006327	16	3018445	3022383	+	16	1848	TNFRSF12A	GO:0016020;GO:0016021;GO:0001525;GO:0001726;GO:0005515;GO:0005515;GO:0005886;GO:0005886;GO:0006915;GO:0006931;GO:0007155;GO:0007155;GO:0007275;GO:0009986;GO:0016020;GO:0016021;GO:0030154;GO:0033209;GO:0043065;GO:0045765;GO:0045773;GO:0061041;GO:0097191;GO:2001238;GO:0001525;GO:0005515;GO:0005515;GO:0005886;GO:0006915;GO:0007155;GO:0007275;GO:0016020;GO:0016021;GO:0030154;GO:0033209;GO:0043065;GO:…	K05149	-	NOG39144	T	TNF receptor superfamily member 12A [Source:HGNCSymbol;Acc:HGNC:18152]	51330
ENSG00000026508	11	35138870	35232402	+	11	10004	CD44	GO:0004888;GO:0004896;GO:0004896;GO:0005515;GO:0005515;GO:0005518;GO:0005540;GO:0005540;GO:0005540;GO:0005794;GO:0005829;GO:0005886;GO:0005886;GO:0005886;GO:0005886;GO:0005887;GO:0005902;GO:0005925;GO:0006954;GO:0007155;GO:0007155;GO:0007155;GO:0007160;GO:0009986;GO:0009986;GO:0016020;GO:0016021;GO:0016021;GO:0016323;GO:0016324;GO:0022617;GO:0030198;GO:0030214;GO:0030214;GO:0030667;GO:0031258;GO:…	K06256	-	NOG41023	-	CD44 molecule (Indian blood group) [Source:HGNCSymbol;Acc:HGNC:1681]	960
ENSG00000077238	16	27313668	27364778	+	16	5894	IL4R	GO:0002532;GO:0004896;GO:0016021;GO:0019221;GO:0002376;GO:0002532;GO:0002639;GO:0004896;GO:0004913;GO:0005515;GO:0005576;GO:0005615;GO:0005886;GO:0005886;GO:0005887;GO:0006955;GO:0007165;GO:0016020;GO:0016020;GO:0016021;GO:0016021;GO:0016064;GO:0019221;GO:0030728;GO:0035771;GO:0042127;GO:0042832;GO:0043032;GO:0043235;GO:0043306;GO:0043627;GO:0045626;GO:0045630;GO:0090197;GO:0120162;GO:0120162;GO:…	K05071	-	NOG46569	-	interleukin 4 receptor [Source:HGNCSymbol;Acc:HGNC:6015]	3566
ENSG00000104998	19	14031748	14053216	+	19	2962	IL27RA	GO:0002827;GO:0002829;GO:0004888;GO:0004896;GO:0005886;GO:0005887;GO:0006955;GO:0007166;GO:0009897;GO:0016020;GO:0016021;GO:0019955;GO:0032729;GO:0043235;GO:0045509;GO:0045509;GO:0048302;GO:0050830;GO:0070106;GO:0070757;	K19598	-	NOG44355	-	interleukin 27 receptor subunit alpha [Source:HGNCSymbol;Acc:HGNC:17290]	9466
ENSG00000109321	4	74445134	74455009	+	4	1648	AREG	GO:0000139;GO:0005125;GO:0005154;GO:0005154;GO:0005515;GO:0005615;GO:0005615;GO:0005615;GO:0005615;GO:0005615;GO:0005634;GO:0005737;GO:0005789;GO:0006888;GO:0007173;GO:0007173;GO:0007173;GO:0007186;GO:0007267;GO:0008083;GO:0008083;GO:0008083;GO:0008083;GO:0008283;GO:0008284;GO:0008284;GO:0008284;GO:0008284;GO:0009986;GO:0010469;GO:0012507;GO:0014009;GO:0014070;GO:0016020;GO:0016021;GO:0031175;GO:…	K09782	-	NOG41450	-	amphiregulin [Source:HGNC Symbol;Acc:HGNC:651]	374
ENSG00000113070	5	140332843	140346631	-	5	3018	HBEGF	GO:0000165;GO:0004713;GO:0005088;GO:0005154;GO:0005154;GO:0005154;GO:0005154;GO:0005576;GO:0005576;GO:0005615;GO:0005615;GO:0005615;GO:0005615;GO:0005886;GO:0005886;GO:0005887;GO:0005887;GO:0005887;GO:0005887;GO:0007165;GO:0007173;GO:0007173;GO:0007173;GO:0007173;GO:0007517;GO:0008016;GO:0008083;GO:0008083;GO:0008083;GO:0008083;GO:0008201;GO:0008201;GO:0008201;GO:0008284;GO:0008284;GO:0009986;GO:…	K08523	-	NOG45526	R	heparin binding EGF like growth factor [Source:HGNCSymbol;Acc:HGNC:3059]	1839
ENSG00000120833	12	93569814	93583487	+	12	6776	SOCS2	GO:0001558;GO:0001558;GO:0005070;GO:0005131;GO:0005159;GO:0005159;GO:0005515;GO:0005737;GO:0005737;GO:0005829;GO:0005942;GO:0007259;GO:0008269;GO:0008269;GO:0009966;GO:0009967;GO:0009968;GO:0016567;GO:0032355;GO:0032870;GO:0035556;GO:0038111;GO:0040008;GO:0043066;GO:0043551;GO:0043687;GO:0046426;GO:0046627;GO:0046854;GO:0046935;GO:0060396;GO:0001558;GO:0001558;GO:0005070;GO:0005131;GO:0005159;GO:…	-	-	NOG320153	-	suppressor of cytokine signaling 2 [Source:HGNCSymbol;Acc:HGNC:19382]	-
ENSG00000124225	20	57648392	57711536	-	20	5619	PMEPA1	GO:0000139;GO:0005515;GO:0005768;GO:0005794;GO:0005886;GO:0009968;GO:0010008;GO:0010991;GO:0010991;GO:0016020;GO:0016021;GO:0030512;GO:0030512;GO:0030512;GO:0030521;GO:0031901;GO:0031901;GO:0043231;GO:0050699;GO:0060394;GO:0070412;GO:0070412;GO:0000139;GO:0005515;GO:0005768;GO:0005794;GO:0005886;GO:0009968;GO:0010008;GO:0010991;GO:0010991;GO:0016020;GO:0016021;GO:0030512;GO:0030512;GO:0030512;GO:…	-	-	NOG27420	-	prostate transmembrane protein, androgen induced 1[Source:HGNC Symbol;Acc:HGNC:14107]	56937
ENSG00000125148	16	56608199	56609497	+	16	1299	MT2A	GO:0005515;GO:0005634;GO:0005634;GO:0005737;GO:0005737;GO:0005829;GO:0006878;GO:0006882;GO:0008144;GO:0008270;GO:0010038;GO:0010273;GO:0035690;GO:0036016;GO:0036018;GO:0045926;GO:0046872;GO:0046872;GO:0046872;GO:0048471;GO:0060333;GO:0071276;GO:0071280;GO:0071294;GO:0071294;GO:0046872;GO:0046872;	K14739	-	-	-	metallothionein 2A [Source:HGNCSymbol;Acc:HGNC:7406]	4502
ENSG00000135919	2	223975112	224039319	-	2	8891	SERPINE2	GO:0004867;GO:0004867;GO:0004867;GO:0004867;GO:0005102;GO:0005515;GO:0005515;GO:0005515;GO:0005539;GO:0005576;GO:0005576;GO:0005576;GO:0005576;GO:0005615;GO:0005615;GO:0005615;GO:0005829;GO:0007275;GO:0007399;GO:0007596;GO:0008201;GO:0008201;GO:0010466;GO:0010757;GO:0010951;GO:0010955;GO:0030154;GO:0030195;GO:0030334;GO:0030414;GO:0031091;GO:0031091;GO:0031232;GO:0031594;GO:0045861;GO:0048711;GO:…	K16643	-	COG4826	O	serpin family E member 2 [Source:HGNCSymbol;Acc:HGNC:8951]	5270
ENSG00000143384	1	150574551	150579738	-	1	4371	MCL1	GO:0005739;GO:0016020;GO:0016021;GO:0042981;GO:0001709;GO:0005515;GO:0005515;GO:0005634;GO:0005634;GO:0005634;GO:0005654;GO:0005737;GO:0005737;GO:0005739;GO:0005739;GO:0005739;GO:0005739;GO:0005741;GO:0005741;GO:0005829;GO:0005829;GO:0005829;GO:0006915;GO:0007275;GO:0008320;GO:0008630;GO:0008630;GO:0010507;GO:0016020;GO:0016020;GO:0016020;GO:0016021;GO:0019221;GO:0019725;GO:0030154;GO:0034097;GO:…	K02539	-	NOG282183	-	MCL1, BCL2 family apoptosis regulator [Source:HGNCSymbol;Acc:HGNC:6943]	4170
ENSG00000160223	21	44217014	44240966	-	21	9341	ICOSLG	GO:0002250;GO:0002376;GO:0005102;GO:0005102;GO:0005515;GO:0005886;GO:0005886;GO:0005886;GO:0006952;GO:0006972;GO:0007165;GO:0009897;GO:0016020;GO:0016021;GO:0031295;GO:0036464;GO:0042104;GO:0042110;GO:0042113;GO:0042802;GO:0050776;GO:0050852;GO:0070062;GO:0002250;GO:0002376;GO:0005102;GO:0005102;GO:0005515;GO:0005886;GO:0005886;GO:0005886;GO:0006952;GO:0006972;GO:0007165;GO:0009897;GO:0016020;GO:…	K06710	-	NOG43300	S	inducible T cell costimulator ligand [Source:HGNCSymbol;Acc:HGNC:17087]	23308
ENSG00000161638	12	54395261	54419460	-	12	7577	ITGA5	GO:0001525;GO:0001618;GO:0001726;GO:0005154;GO:0005161;GO:0005178;GO:0005178;GO:0005515;GO:0005515;GO:0005515;GO:0005737;GO:0005783;GO:0005794;GO:0005886;GO:0005886;GO:0005911;GO:0005925;GO:0005925;GO:0007044;GO:0007155;GO:0007155;GO:0007155;GO:0007155;GO:0007157;GO:0007159;GO:0007229;GO:0007229;GO:0007565;GO:0007613;GO:0008305;GO:0008305;GO:0008305;GO:0009897;GO:0009986;GO:0009986;GO:0010811;GO:…	K06484	-	NOG26407	T	integrin subunit alpha 5 [Source:HGNCSymbol;Acc:HGNC:6141]	3678
ENSG00000167604	19	35887653	35902303	-	19	3198	NFKBID	GO:0005515;GO:0005634;GO:0005634;GO:0006954;GO:0050852;GO:2000321;GO:0005515;GO:0005634;GO:0005634;GO:0005634;GO:0006954;GO:0032088;GO:0033085;GO:0043124;GO:0050852;GO:0050852;GO:0051059;GO:0070245;GO:2000321;GO:2000321;	K14214	-	NOG283039	-	NFKB inhibitor delta [Source:HGNCSymbol;Acc:HGNC:15671]	84807
ENSG00000168685	5	35852695	35879603	+	5	6060	IL7R	GO:0000018;GO:0000902;GO:0001915;GO:0002377;GO:0003823;GO:0004896;GO:0004896;GO:0004917;GO:0005515;GO:0005576;GO:0005886;GO:0005886;GO:0006955;GO:0007165;GO:0007166;GO:0008284;GO:0008361;GO:0009897;GO:0010628;GO:0016020;GO:0016020;GO:0016021;GO:0030217;GO:0030665;GO:0033089;GO:0038111;GO:0042100;GO:0048535;GO:0048872;GO:0061024;GO:0070233;GO:1904894;GO:0004896;GO:0016020;GO:0019221;	K05072	-	NOG39823	S	interleukin 7 receptor [Source:HGNCSymbol;Acc:HGNC:6024]	3575
ENSG00000169429	4	73740506	73743716	+	4	2274	CXCL8	GO:0001525;GO:0002237;GO:0005125;GO:0005153;GO:0005153;GO:0005515;GO:0005515;GO:0005515;GO:0005576;GO:0005576;GO:0005576;GO:0005615;GO:0005615;GO:0005615;GO:0006935;GO:0006935;GO:0006952;GO:0006954;GO:0006954;GO:0006954;GO:0006955;GO:0006955;GO:0007050;GO:0007165;GO:0007186;GO:0007186;GO:0008009;GO:0008009;GO:0008009;GO:0008009;GO:0008285;GO:0010469;GO:0019221;GO:0019722;GO:0030155;GO:0030593;GO:…	K10030	-	NOG73311	-	C-X-C motif chemokine ligand 8 [Source:HGNCSymbol;Acc:HGNC:6025]	3576
ENSG00000170873	8	124550790	124728429	-	8	7727	MTSS1	GO:0001726;GO:0003779;GO:0003779;GO:0003785;GO:0005102;GO:0005515;GO:0005737;GO:0005856;GO:0007009;GO:0007155;GO:0007169;GO:0015629;GO:0030035;GO:0030036;GO:0030036;GO:0030139;GO:0042802;GO:0050680;GO:0061333;GO:0071498;GO:0072102;GO:0072160;GO:2001013;GO:0001726;GO:0003779;GO:0003779;GO:0003785;GO:0005102;GO:0005515;GO:0005737;GO:0005856;GO:0007009;GO:0007155;GO:0007169;GO:0015629;GO:0030035;GO:…	K20128	-	NOG72831	-	MTSS1, I-BAR domain containing [Source:HGNCSymbol;Acc:HGNC:20443]	9788
ENSG00000171236	19	4536409	4540474	-	19	3133	LRG1	GO:0001938;GO:0003674;GO:0005160;GO:0005515;GO:0005576;GO:0005576;GO:0005576;GO:0005615;GO:0005615;GO:0005615;GO:0008150;GO:0009617;GO:0016020;GO:0030511;GO:0035580;GO:0043231;GO:0043312;GO:0045766;GO:0050873;GO:0070062;GO:1904724;GO:1904813;	-	-	COG4886	S	leucine rich alpha-2-glycoprotein 1 [Source:HGNCSymbol;Acc:HGNC:29480]	116844
ENSG00000171951	2	223596940	223602503	-	2	2719	SCG2	GO:0000165;GO:0001525;GO:0001525;GO:0001525;GO:0001937;GO:0001938;GO:0005125;GO:0005125;GO:0005515;GO:0005576;GO:0005615;GO:0005615;GO:0005788;GO:0006954;GO:0009306;GO:0010469;GO:0030141;GO:0030141;GO:0031045;GO:0035556;GO:0042056;GO:0042056;GO:0043542;GO:0043687;GO:0044267;GO:0048245;GO:0048245;GO:0050918;GO:0050930;GO:0098992;GO:2000352;GO:2001237;GO:0030141;GO:0030141;	-	-	NOG47177	-	secretogranin II [Source:HGNCSymbol;Acc:HGNC:10575]	7857
ENSG00000172349	15	81159575	81314058	+	15	12094	IL16	GO:0005125;GO:0005125;GO:0005576;GO:0005576;GO:0005615;GO:0005615;GO:0005634;GO:0005737;GO:0005829;GO:0005829;GO:0005886;GO:0006935;GO:0006955;GO:0010469;GO:0016032;GO:0016607;GO:0019221;GO:0042609;GO:0051924;GO:0005125;GO:0005125;GO:0005125;GO:0005576;GO:0005576;GO:0005615;GO:0005615;GO:0005634;GO:0005737;GO:0005829;GO:0005829;GO:0005886;GO:0006935;GO:0006955;GO:0010469;GO:0016032;GO:0016607;GO:…	K22628	-	NOG150595	S	interleukin 16 [Source:HGNC Symbol;Acc:HGNC:5980]	3603
ENSG00000174500	3	112120841	112133305	-	3	3783	GCSAM	GO:0003779;GO:0005515;GO:0005515;GO:0005737;GO:0005886;GO:0016020;GO:0019901;GO:0045159;GO:0050855;GO:0050855;GO:2000401;GO:2000402;GO:0003779;GO:0005515;GO:0005515;GO:0005737;GO:0005886;GO:0016020;GO:0019901;GO:0045159;GO:0050855;GO:0050855;GO:2000401;GO:2000402;GO:0050855;GO:2000401;GO:0050855;GO:2000401;GO:0003779;GO:0005515;GO:0005515;GO:0005737;GO:0005886;GO:0016020;GO:0019901;GO:0045159;GO:…	-	-	NOG41792	-	germinal center associated signaling and motility[Source:HGNC Symbol;Acc:HGNC:20253]	257144
ENSG00000187678	5	142310427	142326455	-	5	6565	SPRY4	GO:0007275;GO:0009966;GO:0016020;GO:0043407;GO:0070373;GO:1990830;GO:0005515;GO:0005737;GO:0005829;GO:0005886;GO:0005925;GO:0007275;GO:0007275;GO:0009966;GO:0016020;GO:0016020;GO:0032587;GO:0040037;GO:0042995;GO:0043407;GO:0046580;GO:0070373;GO:0070373;	K17385	-	NOG68509	S	sprouty RTK signaling antagonist 4 [Source:HGNCSymbol;Acc:HGNC:15533]	81848
ENSG00000100055	22	37282027	37315345	+	22	6161	CYTH4	GO:0005086;GO:0032012;GO:0000139;GO:0005085;GO:0005086;GO:0005086;GO:0005829;GO:0005886;GO:0008289;GO:0016020;GO:0032012;GO:0005086;GO:0032012;GO:0005086;GO:0032012;	K18441	-	COG5307	R	cytohesin 4 [Source:HGNC Symbol;Acc:HGNC:9505]	27128
ENSG00000105339	8	141117278	141195808	+	8	14670	DENND3	GO:0005085;GO:0005737;GO:0005829;GO:0008333;GO:0008333;GO:0017112;GO:0017112;GO:0017112;GO:0044257;GO:0044257;GO:0005085;GO:0005737;GO:0005829;GO:0008333;GO:0017112;GO:0017112;GO:0044257;	K20162	-	NOG115977	S	DENN domain containing 3 [Source:HGNCSymbol;Acc:HGNC:29134]	22898
ENSG00000120875	8	29333064	29350668	-	8	7257	DUSP4	GO:0000188;GO:0000188;GO:0004721;GO:0004725;GO:0004725;GO:0004725;GO:0005515;GO:0005634;GO:0005634;GO:0005654;GO:0005654;GO:0005737;GO:0006470;GO:0008138;GO:0008138;GO:0008330;GO:0016311;GO:0016311;GO:0016787;GO:0016791;GO:0016791;GO:0017017;GO:0017017;GO:0035335;GO:0035970;GO:0070373;GO:1990439;GO:0000188;GO:0000188;GO:0004721;GO:0004725;GO:0004725;GO:0004725;GO:0005515;GO:0005634;GO:0005634;GO:…	K04459	-	COG2453	T	dual specificity phosphatase 4 [Source:HGNCSymbol;Acc:HGNC:3070]	1846
ENSG00000137331	6	30743199	30744554	-	6	1356	IER3	GO:0043066;GO:0005515;GO:0005634;GO:0005634;GO:0005829;GO:0006915;GO:0009653;GO:0014066;GO:0016020;GO:0016021;GO:0043066;GO:0043066;GO:2001020;GO:2001020;	-	-	NOG46208	R	immediate early response 3 [Source:HGNCSymbol;Acc:HGNC:5392]	8870
ENSG00000138166	10	110497838	110511544	+	10	2615	DUSP5	GO:0000165;GO:0000187;GO:0000188;GO:0004721;GO:0004725;GO:0004725;GO:0004725;GO:0005515;GO:0005634;GO:0005634;GO:0005654;GO:0005737;GO:0006470;GO:0006470;GO:0008138;GO:0008138;GO:0008138;GO:0008138;GO:0016311;GO:0016311;GO:0016787;GO:0016791;GO:0016791;GO:0017017;GO:0017017;GO:0035335;GO:0035970;	K04459	-	COG2453	T	dual specificity phosphatase 5 [Source:HGNCSymbol;Acc:HGNC:3071]	1847
ENSG00000139318	12	89347232	89353271	-	12	4632	DUSP6	GO:0000165;GO:0000187;GO:0000188;GO:0000188;GO:0001933;GO:0004721;GO:0004721;GO:0004725;GO:0004725;GO:0005654;GO:0005737;GO:0005737;GO:0005737;GO:0005829;GO:0005829;GO:0005829;GO:0006470;GO:0006470;GO:0006470;GO:0008138;GO:0008138;GO:0008138;GO:0008138;GO:0010033;GO:0010942;GO:0014070;GO:0016311;GO:0016787;GO:0016791;GO:0017017;GO:0017017;GO:0017017;GO:0030154;GO:0035335;GO:0035335;GO:0042493;GO:…	K21946	-	COG2453	T	dual specificity phosphatase 6 [Source:HGNCSymbol;Acc:HGNC:3072]	1848
ENSG00000143507	1	221701424	221742176	-	1	2914	DUSP10	GO:0000188;GO:0002819;GO:0004721;GO:0004725;GO:0004725;GO:0005515;GO:0005634;GO:0005634;GO:0005654;GO:0005737;GO:0005737;GO:0005737;GO:0005794;GO:0005829;GO:0006470;GO:0006470;GO:0006470;GO:0008138;GO:0008138;GO:0008330;GO:0008432;GO:0010033;GO:0010633;GO:0010633;GO:0016311;GO:0016311;GO:0016607;GO:0016787;GO:0016791;GO:0016791;GO:0017017;GO:0030336;GO:0032496;GO:0032873;GO:0033549;GO:0033549;GO:…	K20216	-	COG2453	T	dual specificity phosphatase 10 [Source:HGNCSymbol;Acc:HGNC:3065]	11221
ENSG00000146242	6	82363206	82370828	+	6	6904	TPBG	GO:0005886;GO:0005887;GO:0007155;GO:0009986;GO:0016020;GO:0016021;GO:0005737;GO:0005783;GO:0005886;GO:0005887;GO:0007155;GO:0009986;GO:0016020;GO:0016021;GO:0051965;GO:0005886;GO:0005887;GO:0007155;GO:0009986;GO:0016020;GO:0016021;	-	-	NOG301461	-	trophoblast glycoprotein [Source:HGNCSymbol;Acc:HGNC:12004]	7162
ENSG00000166289	19	29665056	29675457	+	19	2681	PLEKHF1	GO:0005515;GO:0005634;GO:0005737;GO:0005764;GO:0005764;GO:0005764;GO:0005765;GO:0005768;GO:0006915;GO:0007032;GO:0010008;GO:0010314;GO:0010508;GO:0016050;GO:0032266;GO:0035091;GO:0046872;GO:0046872;GO:0048471;GO:0070273;GO:0072659;GO:2001244;GO:0005515;GO:0005634;GO:0005737;GO:0005764;GO:0005764;GO:0005765;GO:0005768;GO:0006915;GO:0007032;GO:0010008;GO:0010314;GO:0010508;GO:0016050;GO:0032266;GO:…	-	-	NOG308864	-	pleckstrin homology and FYVE domain containing 1[Source:HGNC Symbol;Acc:HGNC:20764]	79156
ENSG00000175463	11	67403915	67410089	+	11	4993	TBC1D10C	GO:0005096;GO:0005096;GO:0005515;GO:0005829;GO:0005886;GO:0005886;GO:0006886;GO:0016020;GO:0017137;GO:0031527;GO:0042147;GO:0043312;GO:0090630;GO:0101003;GO:0005096;GO:0005096;GO:0005515;GO:0005829;GO:0005886;GO:0005886;GO:0006886;GO:0016020;GO:0017137;GO:0031527;GO:0042147;GO:0043312;GO:0090630;GO:0101003;GO:0005096;GO:0005096;GO:0005515;GO:0005829;GO:0005886;GO:0005886;GO:0006886;GO:0016020;GO:…	K19944	-	COG5210	R	TBC1 domain family member 10C [Source:HGNCSymbol;Acc:HGNC:24702]	374403
ENSG00000274286	2	96112875	96116245	-	2	3371	ADRA2B	GO:0000187;GO:0003056;GO:0004930;GO:0004930;GO:0004935;GO:0004935;GO:0004938;GO:0004938;GO:0004938;GO:0004938;GO:0005515;GO:0005515;GO:0005515;GO:0005886;GO:0005886;GO:0005886;GO:0005887;GO:0005887;GO:0006940;GO:0007165;GO:0007186;GO:0007186;GO:0007186;GO:0007186;GO:0007188;GO:0007267;GO:0007565;GO:0009986;GO:0010700;GO:0016020;GO:0016021;GO:0016021;GO:0019229;GO:0030168;GO:0032148;GO:0032811;GO:…	K04139	-	-	-	adrenoceptor alpha 2B [Source:HGNCSymbol;Acc:HGNC:282]	151
ENSG00000069020	5	66596361	67169595	+	5	14675	MAST4	GO:0000166;GO:0000287;GO:0004672;GO:0004674;GO:0004674;GO:0004674;GO:0005524;GO:0005524;GO:0005737;GO:0006468;GO:0007010;GO:0016301;GO:0016310;GO:0016740;GO:0018105;GO:0035556;GO:0046872;GO:0000166;GO:0000287;GO:0004672;GO:0004674;GO:0004674;GO:0004674;GO:0005524;GO:0005524;GO:0005737;GO:0006468;GO:0007010;GO:0016301;GO:0016310;GO:0016740;GO:0018105;GO:0035556;GO:0046872;GO:0004674;GO:0006468;GO:…	K08789	EC:2.7.11.1	COG0515	T	microtubule associated serine/threonine kinasefamily member 4 [Source:HGNC Symbol;Acc:HGNC:19037]	375449
ENSG00000079337	12	47734367	47771040	-	12	12078	RAPGEF3	GO:0000166;GO:0001525;GO:0005085;GO:0005085;GO:0005085;GO:0005085;GO:0005085;GO:0005515;GO:0005886;GO:0005886;GO:0005902;GO:0007165;GO:0007264;GO:0008283;GO:0012505;GO:0016020;GO:0016020;GO:0017034;GO:0019904;GO:0019933;GO:0030027;GO:0030175;GO:0030552;GO:0030864;GO:0032486;GO:0033138;GO:0034242;GO:0035556;GO:0043547;GO:0045766;GO:0046827;GO:0050796;GO:0051496;GO:0060143;GO:0061028;GO:0070062;GO:…	K08014	-	COG0664	T	Rap guanine nucleotide exchange factor 3[Source:HGNC Symbol;Acc:HGNC:16629]	10411
ENSG00000100276	22	29312933	29319679	-	22	2240	RASL10A	GO:0000166;GO:0003924;GO:0003924;GO:0005525;GO:0005525;GO:0005634;GO:0005730;GO:0005886;GO:0007165;GO:0007264;GO:0016020;GO:0016020;GO:0000166;GO:0003924;GO:0003924;GO:0005525;GO:0005525;GO:0005634;GO:0005730;GO:0005886;GO:0007165;GO:0007264;GO:0016020;GO:0016020;	K07850	-	NOG300332	-	RAS like family 10 member A [Source:HGNCSymbol;Acc:HGNC:16954]	10633
ENSG00000112149	6	14117256	14136918	+	6	2515	CD83	GO:0016020;GO:0016021;GO:0005515;GO:0005886;GO:0005887;GO:0006952;GO:0006959;GO:0007165;GO:0009897;GO:0014070;GO:0016020;GO:0016021;GO:0032713;GO:0032733;GO:0032743;GO:0043372;	K06510	-	NOG44884	-	CD83 molecule [Source:HGNC Symbol;Acc:HGNC:1703]	9308
ENSG00000123094	12	25959029	26079892	+	12	7619	RASSF8	GO:0007165;GO:0034334;GO:0007165;GO:0034334;GO:0007165;GO:0034334;GO:0007165;GO:0034334;GO:0007165;GO:0034334;GO:0007165;GO:0034334;GO:0007165;GO:0034334;GO:0007165;GO:0034334;GO:0007165;GO:0007165;GO:0034334;GO:0007165;GO:0034334;GO:0007165;GO:0034334;GO:0007165;GO:0034334;GO:0034334;	K09855	-	NOG306245	-	Ras association domain family member 8 [Source:HGNCSymbol;Acc:HGNC:13232]	11228
ENSG00000133477	22	39994949	40043529	+	22	16389	FAM83F	-	-	-	NOG41218	-	family with sequence similarity 83 member F[Source:HGNC Symbol;Acc:HGNC:25148]	113828
ENSG00000181773	1	27392644	27395814	+	1	2115	GPR3	GO:0004930;GO:0004930;GO:0004930;GO:0005515;GO:0005886;GO:0005887;GO:0007165;GO:0007186;GO:0007186;GO:0007189;GO:0016020;GO:0016021;GO:0016021;GO:0040020;GO:0120162;GO:0120162;	K04311	-	NOG320944	-	G protein-coupled receptor 3 [Source:HGNCSymbol;Acc:HGNC:4484]	2827
ENSG00000188042	2	234493041	234497053	-	2	4013	ARL4C	GO:0000166;GO:0003924;GO:0005515;GO:0005525;GO:0005525;GO:0005525;GO:0005634;GO:0005737;GO:0005737;GO:0005829;GO:0005886;GO:0005886;GO:0005886;GO:0006886;GO:0016020;GO:0016192;GO:0030175;GO:0032456;GO:0032456;GO:0042995;GO:0043014;GO:0000166;GO:0003924;GO:0005515;GO:0005525;GO:0005525;GO:0005525;GO:0005634;GO:0005737;GO:0005737;GO:0005829;GO:0005886;GO:0005886;GO:0005886;GO:0006886;GO:0016020;GO:…	K07945	-	COG1100	R	ADP ribosylation factor like GTPase 4C [Source:HGNCSymbol;Acc:HGNC:698]	10123
ENSG00000196639	3	11137093	11263557	+	3	5546	HRH1	GO:0004930;GO:0004930;GO:0004930;GO:0004930;GO:0004969;GO:0004969;GO:0004969;GO:0004969;GO:0004993;GO:0005829;GO:0005886;GO:0005886;GO:0005886;GO:0005887;GO:0005887;GO:0005887;GO:0005887;GO:0006954;GO:0007165;GO:0007186;GO:0007186;GO:0007186;GO:0007186;GO:0007187;GO:0007200;GO:0007268;GO:0016020;GO:0016021;GO:0016021;GO:0030425;GO:0030594;GO:0032962;GO:0043114;GO:0045907;GO:0048016;GO:0048245;GO:…	K04149	-	NOG318797	-	histamine receptor H1 [Source:HGNCSymbol;Acc:HGNC:5182]	3269
ENSG00000204291	9	98943179	99070792	+	9	6653	COL15A1	GO:0001525;GO:0005198;GO:0005201;GO:0005576;GO:0005576;GO:0005581;GO:0005582;GO:0005604;GO:0005604;GO:0005615;GO:0005615;GO:0005788;GO:0007155;GO:0007155;GO:0007165;GO:0007275;GO:0016021;GO:0030020;GO:0030154;GO:0030198;GO:0030574;GO:0031012;GO:0062023;GO:0070062;GO:0005198;GO:0005581;GO:0005604;GO:0007155;	K08135	-	NOG12793	-	collagen type XV alpha 1 chain [Source:HGNCSymbol;Acc:HGNC:2192]	1306
ENSG00000059804	12	7919230	7936275	-	12	6159	SLC2A3	GO:0005215;GO:0005355;GO:0005355;GO:0005355;GO:0005536;GO:0005886;GO:0005886;GO:0005887;GO:0005975;GO:0008643;GO:0016020;GO:0016020;GO:0016021;GO:0016021;GO:0019852;GO:0022857;GO:0030667;GO:0033300;GO:0035579;GO:0042995;GO:0043204;GO:0043312;GO:0055056;GO:0055085;GO:0070062;GO:0070821;GO:0070837;GO:0101003;GO:1904659;GO:1904659;GO:1904659;GO:1904659;GO:0005215;GO:0016020;GO:0016021;GO:0016021;GO:…	K08142	-	COG0477	G	solute carrier family 2 member 3 [Source:HGNCSymbol;Acc:HGNC:11007]	6515
ENSG00000103196	16	84819984	84920768	+	16	7965	CRISPLD2	GO:0005539;GO:0005539;GO:0005576;GO:0005576;GO:0005576;GO:0005615;GO:0008201;GO:0030133;GO:0030198;GO:0030324;GO:0031012;GO:0034774;GO:0043312;GO:0060325;GO:0070062;GO:1904813;GO:0005576;GO:0005539;GO:0005576;GO:0005576;GO:0005576;GO:0005615;GO:0030133;GO:0034774;GO:0043312;GO:0060325;GO:0070062;GO:1904813;GO:0005539;GO:0005576;GO:0005576;GO:0005576;GO:0005615;GO:0030133;GO:0034774;GO:0043312;GO:…	-	-	COG2340	S	cysteine rich secretory protein LCCL domaincontaining 2 [Source:HGNC Symbol;Acc:HGNC:25248]	83716
ENSG00000116690	1	186296279	186314562	+	1	5044	PRG4	GO:0005044;GO:0006898;GO:0006955;GO:0030247;GO:0005044;GO:0006898;GO:0006955;GO:0030247;GO:0005044;GO:0005576;GO:0006898;GO:0006955;GO:0008283;GO:0030021;GO:0030247;GO:0062023;GO:0005044;GO:0005576;GO:0006898;GO:0006955;GO:0008283;GO:0030021;GO:0030247;GO:0062023;GO:0005044;GO:0005576;GO:0006898;GO:0006955;GO:0008283;GO:0030021;GO:0030247;GO:0062023;GO:0005044;GO:0005576;GO:0006898;GO:0006955;GO:…	-	-	NOG12793	-	proteoglycan 4 [Source:HGNC Symbol;Acc:HGNC:9364]	10216
ENSG00000117226	1	89006666	89022894	-	1	4297	GBP3	GO:0000139;GO:0000166;GO:0002376;GO:0003924;GO:0005515;GO:0005515;GO:0005525;GO:0005525;GO:0005737;GO:0005794;GO:0005829;GO:0016020;GO:0016787;GO:0042803;GO:0048471;GO:0051607;GO:0071347;GO:0071356;GO:0000166;GO:0003924;GO:0005525;GO:0005525;GO:0016020;GO:0000166;GO:0003924;GO:0005525;GO:0005525;GO:0016020;GO:0000166;GO:0003924;GO:0005525;GO:0005525;GO:0016020;GO:0003924;GO:0005525;GO:0003924;GO:…	K20899	-	NOG288755	-	guanylate binding protein 3 [Source:HGNCSymbol;Acc:HGNC:4184]	2635
ENSG00000140284	15	50182196	50236395	+	15	2802	SLC27A2	GO:0000038;GO:0000166;GO:0001561;GO:0001561;GO:0001676;GO:0001676;GO:0003824;GO:0004467;GO:0004467;GO:0004467;GO:0004467;GO:0004467;GO:0005102;GO:0005102;GO:0005324;GO:0005524;GO:0005777;GO:0005777;GO:0005778;GO:0005778;GO:0005778;GO:0005779;GO:0005779;GO:0005783;GO:0005783;GO:0005783;GO:0005788;GO:0005788;GO:0005789;GO:0005789;GO:0005829;GO:0005886;GO:0006625;GO:0006629;GO:0006631;GO:0006635;GO:…	K08746	-	COG0318	I	solute carrier family 27 member 2 [Source:HGNCSymbol;Acc:HGNC:10996]	11001
ENSG00000173110	1	161524540	161526910	+	1	2371	HSPA6	GO:0000166;GO:0005515;GO:0005524;GO:0005524;GO:0005576;GO:0005634;GO:0005737;GO:0005737;GO:0005814;GO:0005829;GO:0005829;GO:0006986;GO:0006986;GO:0008180;GO:0008180;GO:0016887;GO:0019899;GO:0031072;GO:0031072;GO:0032991;GO:0034605;GO:0034605;GO:0034620;GO:0034774;GO:0042026;GO:0042026;GO:0042623;GO:0042623;GO:0043312;GO:0044183;GO:0051082;GO:0051082;GO:0051085;GO:0051787;GO:0070062;GO:0072562;GO:…	K03283	-	COG0443	O	heat shock protein family A (Hsp70) member 6[Source:HGNC Symbol;Acc:HGNC:5239]	3310
ENSG00000095303	9	122370530	122395703	+	9	5791	PTGS1	GO:0001516;GO:0004601;GO:0004666;GO:0006954;GO:0006979;GO:0008217;GO:0019371;GO:0020037;GO:0055114;GO:0098869;GO:0001516;GO:0001516;GO:0004601;GO:0004601;GO:0004601;GO:0004666;GO:0004666;GO:0004666;GO:0004666;GO:0005737;GO:0005737;GO:0005783;GO:0005789;GO:0005789;GO:0005794;GO:0006629;GO:0006631;GO:0006633;GO:0006693;GO:0006805;GO:0006954;GO:0006979;GO:0008217;GO:0008217;GO:0016020;GO:0016491;GO:…	K00509	EC:1.14.99.1	NOG39991	S	prostaglandin-endoperoxide synthase 1 [Source:HGNCSymbol;Acc:HGNC:9604]	5742
ENSG00000003436	2	187464230	187565760	-	2	11714	TFPI	GO:0004866;GO:0004867;GO:0004867;GO:0004867;GO:0005576;GO:0005576;GO:0005576;GO:0005615;GO:0005615;GO:0005783;GO:0005886;GO:0005901;GO:0007596;GO:0007596;GO:0007598;GO:0007599;GO:0009986;GO:0010466;GO:0010466;GO:0010951;GO:0016020;GO:0030195;GO:0030414;GO:0030414;GO:0031090;GO:0031225;GO:0043231;GO:0071383;GO:0004866;GO:0004867;GO:0004867;GO:0004867;GO:0005576;GO:0005576;GO:0005576;GO:0005615;GO:…	K03909	-	NOG86404	S	tissue factor pathway inhibitor [Source:HGNCSymbol;Acc:HGNC:11760]	7035
ENSG00000126231	13	113158654	113172383	+	13	1666	PROZ	GO:0004252;GO:0005509;GO:0005576;GO:0005576;GO:0005615;GO:0005788;GO:0005796;GO:0006508;GO:0006888;GO:0007596;GO:0007596;GO:0007596;GO:0007599;GO:0070062;GO:0004252;GO:0005509;GO:0005576;GO:0005576;GO:0005576;GO:0005615;GO:0005788;GO:0005796;GO:0006508;GO:0006888;GO:0007596;GO:0007596;GO:0007596;GO:0007596;GO:0007599;GO:0070062;	-	-	NOG145536	S	protein Z, vitamin K dependent plasma glycoprotein[Source:HGNC Symbol;Acc:HGNC:9460]	8858
ENSG00000167772	19	8363289	8374373	+	19	2482	ANGPTL4	GO:0001525;GO:0001525;GO:0001666;GO:0001666;GO:0004857;GO:0004857;GO:0005515;GO:0005576;GO:0005576;GO:0005576;GO:0005615;GO:0005615;GO:0005615;GO:0007275;GO:0019216;GO:0030154;GO:0042802;GO:0043066;GO:0043066;GO:0043066;GO:0045766;GO:0051005;GO:0051005;GO:0051260;GO:0070328;GO:0070328;GO:0072562;GO:2000352;GO:0001525;GO:0001525;GO:0001666;GO:0004857;GO:0005515;GO:0005576;GO:0005576;GO:0005615;GO:…	K08767	-	NOG281759	-	angiopoietin like 4 [Source:HGNCSymbol;Acc:HGNC:16039]	51129
ENSG00000175294	11	66016752	66026517	-	11	2687	CATSPER1	GO:0005216;GO:0005227;GO:0005244;GO:0005245;GO:0005262;GO:0005515;GO:0005886;GO:0005886;GO:0005929;GO:0006811;GO:0006811;GO:0006816;GO:0007275;GO:0007283;GO:0007283;GO:0016020;GO:0016020;GO:0016021;GO:0030154;GO:0030317;GO:0030317;GO:0031514;GO:0034765;GO:0035036;GO:0036128;GO:0036128;GO:0036128;GO:0042995;GO:0055085;GO:0060296;GO:0070588;	K16889	-	NOG270165	-	cation channel sperm associated 1 [Source:HGNCSymbol;Acc:HGNC:17116]	117144
ENSG00000198771	1	167630093	167706249	+	1	5718	RCSD1	GO:0003009;GO:0005884;GO:0051015;GO:0071474;	K18615	-	NOG78730	K	RCSD domain containing 1 [Source:HGNCSymbol;Acc:HGNC:28310]	92241

## Sheet: 0h_vs_6h.DESeq.Down
ID	Chromosome	Start Site	End Site	Direction	Length	Name	GO	KEGG	EC	eggNOG Class	eggNOG	Description	NCBI	UniProtID
ENSG00000139445	12	109277979	109309220	-	3471	FOXN4	GO:0003677;GO:0003700;GO:0005634;GO:0006355;GO:0043565;GO:0000981;GO:0001158;GO:0001947;GO:0003677;GO:0003682;GO:0003700;GO:0003700;GO:0005515;GO:0005634;GO:0006355;GO:0006355;GO:0006357;GO:0007275;GO:0007399;GO:0008016;GO:0010842;GO:0035881;GO:0036302;GO:0043565;GO:0045893;GO:0060579;GO:0000981;GO:0001158;GO:0001158;GO:0001947;GO:0003677;GO:0003682;GO:0003682;GO:0003700;GO:0003700;GO:0003700;GO:…	K09407	-	COG5025	K	forkhead box N4 [Source:HGNCSymbol;Acc:HGNC:21399]	121643	Q96NZ1;A6H901
ENSG00000145687	5	81413021	81751797	-	11284	SSBP2	GO:0000978;GO:0001228;GO:0003677;GO:0003697;GO:0003697;GO:0005634;GO:0005634;GO:0005737;GO:0006355;GO:0045944;GO:0003697;GO:0000978;GO:0001228;GO:0003677;GO:0003697;GO:0003697;GO:0005634;GO:0005634;GO:0005737;GO:0006355;GO:0045944;GO:0000978;GO:0001228;GO:0003677;GO:0003697;GO:0003697;GO:0005634;GO:0005634;GO:0005737;GO:0006355;GO:0045944;GO:0000978;GO:0001228;GO:0003677;GO:0003697;GO:0003697;GO:…	-	-	NOG245801	-	single stranded DNA binding protein 2 [Source:HGNCSymbol;Acc:HGNC:15831]	23635	P81877
ENSG00000160685	1	155002630	155018522	+	4303	ZBTB7B	GO:0000122;GO:0000978;GO:0000981;GO:0001158;GO:0001228;GO:0001865;GO:0003676;GO:0003677;GO:0005515;GO:0005634;GO:0005634;GO:0005634;GO:0005654;GO:0006366;GO:0007275;GO:0007398;GO:0007595;GO:0010628;GO:0010628;GO:0010629;GO:0030154;GO:0031065;GO:0032868;GO:0042803;GO:0043372;GO:0043377;GO:0046628;GO:0046872;GO:0051141;GO:0060850;GO:0072615;GO:0090336;GO:0120162;GO:1990845;GO:2000640;GO:0000122;GO:…	K10494	-	COG5048	R	zinc finger and BTB domain containing 7B[Source:HGNC Symbol;Acc:HGNC:18668]	51043	O15156
ENSG00000163884	3	126342635	126357442	-	2848	KLF15	GO:0000977;GO:0000978;GO:0000981;GO:0000981;GO:0001228;GO:0001678;GO:0003676;GO:0003677;GO:0003677;GO:0003700;GO:0005515;GO:0005515;GO:0005634;GO:0005634;GO:0005634;GO:0006357;GO:0010001;GO:0010468;GO:0014898;GO:0032868;GO:0044212;GO:0044212;GO:0045893;GO:0045944;GO:0046326;GO:0046872;GO:0072112;GO:0072112;GO:1901653;GO:2000757;GO:2000757;	K09210	-	COG5048	R	Kruppel like factor 15 [Source:HGNCSymbol;Acc:HGNC:14536]	28999	Q9UIH9
ENSG00000164850	7	1082208	1093815	+	3149	GPER1	GO:0000139;GO:0001934;GO:0001956;GO:0002376;GO:0002695;GO:0003682;GO:0004930;GO:0004930;GO:0004930;GO:0005496;GO:0005515;GO:0005634;GO:0005635;GO:0005737;GO:0005739;GO:0005768;GO:0005769;GO:0005783;GO:0005789;GO:0005794;GO:0005794;GO:0005802;GO:0005856;GO:0005886;GO:0005886;GO:0005887;GO:0006915;GO:0006954;GO:0007049;GO:0007165;GO:0007186;GO:0007186;GO:0007186;GO:0007186;GO:0007186;GO:0007189;GO:…	K04246	-	NOG151076	S	G protein-coupled estrogen receptor 1 [Source:HGNCSymbol;Acc:HGNC:4485]	2852	Q99527;A0A024R849;Q63ZY2
ENSG00000166407	11	8224304	8268716	-	1690	LMO1	GO:0000122;GO:0005515;GO:0005634;GO:0005634;GO:0005654;GO:0045944;GO:0045944;GO:0046013;GO:0046872;GO:1902036;GO:0005515;GO:0005634;GO:0005654;GO:0045944;GO:0046872;GO:1902036;GO:0046872;	-	-	NOG288849	-	LIM domain only 1 [Source:HGNCSymbol;Acc:HGNC:6641]	4004	P25800
ENSG00000171388	X	129645259	129654937	-	3205	APLN	GO:0001525;GO:0002026;GO:0005102;GO:0005179;GO:0005179;GO:0005576;GO:0005576;GO:0005615;GO:0005615;GO:0005615;GO:0006955;GO:0007165;GO:0007165;GO:0007186;GO:0007275;GO:0007369;GO:0007595;GO:0007631;GO:0008284;GO:0010469;GO:0010629;GO:0031652;GO:0031704;GO:0031704;GO:0031704;GO:0040037;GO:0042327;GO:0042756;GO:0042756;GO:0042803;GO:0043576;GO:0045776;GO:0045776;GO:0045823;GO:0045823;GO:0045906;GO:…	K05225	-	NOG86365	-	apelin [Source:HGNC Symbol;Acc:HGNC:16665]	8862	Q9ULZ1
ENSG00000185630	1	164555584	164899296	+	21249	PBX1	GO:0003700;GO:0005634;GO:0005654;GO:0006355;GO:0000977;GO:0000978;GO:0000981;GO:0001228;GO:0001655;GO:0001658;GO:0003677;GO:0003677;GO:0003677;GO:0003677;GO:0003700;GO:0003700;GO:0005515;GO:0005515;GO:0005634;GO:0005634;GO:0005634;GO:0005654;GO:0005654;GO:0005667;GO:0005737;GO:0005737;GO:0006355;GO:0006694;GO:0007221;GO:0007275;GO:0007548;GO:0008284;GO:0009887;GO:0009952;GO:0009954;GO:0010971;GO:…	K09355	-	NOG248144	-	PBX homeobox 1 [Source:HGNC Symbol;Acc:HGNC:8632]	5087	P40424;A0A024R919;A8K5V0
ENSG00000205683	14	72619296	72894116	-	6889	DPF3	GO:0000123;GO:0000790;GO:0003676;GO:0004402;GO:0005634;GO:0005634;GO:0005654;GO:0006325;GO:0007399;GO:0007399;GO:0008150;GO:0008270;GO:0008270;GO:0016573;GO:0042393;GO:0045892;GO:0045944;GO:0046872;GO:0071565;GO:0071565;GO:0071565;GO:0000123;GO:0000790;GO:0003676;GO:0004402;GO:0005634;GO:0005634;GO:0005654;GO:0006325;GO:0007399;GO:0007399;GO:0008150;GO:0008270;GO:0008270;GO:0016573;GO:0042393;GO:…	K22198	-	NOG271547	-	double PHD fingers 3 [Source:HGNCSymbol;Acc:HGNC:17427]	8110	Q92784
ENSG00000034152	17	21284672	21315240	+	3783	MAP2K3	GO:0000165;GO:0000166;GO:0000187;GO:0000187;GO:0000187;GO:0004672;GO:0004674;GO:0004674;GO:0004708;GO:0004708;GO:0004708;GO:0004713;GO:0005515;GO:0005515;GO:0005524;GO:0005524;GO:0005654;GO:0005737;GO:0005829;GO:0006468;GO:0006954;GO:0007165;GO:0016020;GO:0016301;GO:0016310;GO:0016740;GO:0018108;GO:0019901;GO:0019901;GO:0023014;GO:0031098;GO:0032147;GO:0035924;GO:0038066;GO:0042035;GO:0043536;GO:…	K04432	EC:2.7.12.2	COG0515	T	mitogen-activated protein kinase kinase 3[Source:HGNC Symbol;Acc:HGNC:6843]	5606	P46734;Q6FI23
ENSG00000056558	9	120902393	120929173	-	6449	TRAF1	GO:0005164;GO:0005164;GO:0005164;GO:0005515;GO:0005515;GO:0005737;GO:0005829;GO:0006915;GO:0007165;GO:0008270;GO:0010803;GO:0031625;GO:0031625;GO:0031996;GO:0031996;GO:0032991;GO:0042802;GO:0042981;GO:0051092;GO:0065003;GO:2001236;GO:0005164;GO:0005164;GO:0005164;GO:0005515;GO:0005515;GO:0005737;GO:0005829;GO:0006915;GO:0007165;GO:0008270;GO:0010803;GO:0031625;GO:0031625;GO:0031996;GO:0031996;GO:…	K03172	-	NOG264247	-	TNF receptor associated factor 1 [Source:HGNCSymbol;Acc:HGNC:12031]	7185	Q13077
ENSG00000069399	19	44747705	44760044	+	3242	BCL3	GO:0000060;GO:0002268;GO:0002315;GO:0002455;GO:0002467;GO:0003677;GO:0003700;GO:0005515;GO:0005515;GO:0005634;GO:0005654;GO:0005737;GO:0005829;GO:0005886;GO:0006351;GO:0006974;GO:0007249;GO:0008134;GO:0009615;GO:0010225;GO:0019730;GO:0030198;GO:0030330;GO:0030496;GO:0030674;GO:0032729;GO:0032991;GO:0032996;GO:0033257;GO:0042088;GO:0042536;GO:0042742;GO:0042771;GO:0042832;GO:0042981;GO:0043066;GO:…	K09258	-	COG0666	R	B cell CLL/lymphoma 3 [Source:HGNCSymbol;Acc:HGNC:998]	602	P20749
ENSG00000075426	2	28392448	28417312	+	7157	FOSL2	GO:0000977;GO:0000978;GO:0000981;GO:0001228;GO:0003677;GO:0003677;GO:0003700;GO:0003700;GO:0005515;GO:0005634;GO:0005634;GO:0005634;GO:0005654;GO:0006355;GO:0006357;GO:0006357;GO:0008219;GO:0045944;GO:0000977;GO:0000977;GO:0000978;GO:0000981;GO:0001228;GO:0003334;GO:0003677;GO:0003677;GO:0003682;GO:0003700;GO:0003700;GO:0005515;GO:0005634;GO:0005634;GO:0005634;GO:0005634;GO:0005654;GO:0006355;GO:…	K09030	-	NOG301361	-	FOS like 2, AP-1 transcription factor subunit[Source:HGNC Symbol;Acc:HGNC:3798]	2355	P15408;Q9H5M2
ENSG00000077150	10	102394110	102402529	+	4484	NFKB2	GO:0000978;GO:0000981;GO:0001228;GO:0003677;GO:0003677;GO:0003700;GO:0003700;GO:0003713;GO:0005515;GO:0005515;GO:0005634;GO:0005634;GO:0005654;GO:0005737;GO:0005737;GO:0005829;GO:0005829;GO:0006355;GO:0006355;GO:0007165;GO:0032481;GO:0033257;GO:0038061;GO:0045944;GO:0048511;GO:0051092;GO:0000978;GO:0000981;GO:0001228;GO:0002268;GO:0002467;GO:0003677;GO:0003677;GO:0003700;GO:0003700;GO:0003713;GO:…	K04469	-	COG0666	R	nuclear factor kappa B subunit 2 [Source:HGNCSymbol;Acc:HGNC:7795]	4791	Q00653
ENSG00000104856	19	45001430	45038198	+	3035	RELB	GO:0000122;GO:0000977;GO:0000980;GO:0000980;GO:0000981;GO:0000981;GO:0002223;GO:0003677;GO:0003677;GO:0003677;GO:0003677;GO:0003682;GO:0003700;GO:0003700;GO:0003714;GO:0005515;GO:0005634;GO:0005634;GO:0005634;GO:0005634;GO:0005634;GO:0005654;GO:0005654;GO:0005654;GO:0005737;GO:0005737;GO:0005813;GO:0005815;GO:0005829;GO:0005829;GO:0005829;GO:0005829;GO:0005856;GO:0006355;GO:0006357;GO:0006954;GO:…	K09253	-	NOG119056	S	RELB proto-oncogene, NF-kB subunit [Source:HGNCSymbol;Acc:HGNC:9956]	5971	Q01201
ENSG00000108551	17	17494437	17496395	-	1748	RASD1	GO:0000166;GO:0003924;GO:0003924;GO:0005515;GO:0005525;GO:0005525;GO:0005634;GO:0005634;GO:0005737;GO:0005737;GO:0005886;GO:0007165;GO:0007165;GO:0007186;GO:0007263;GO:0016020;GO:0016020;GO:0016529;GO:0045892;GO:0048471;GO:0048471;GO:0000166;GO:0003924;GO:0003924;GO:0005515;GO:0005525;GO:0005525;GO:0005634;GO:0005737;GO:0005886;GO:0007165;GO:0007165;GO:0007186;GO:0016020;GO:0016020;GO:0048471;	K07843	-	COG1100	R	ras related dexamethasone induced 1 [Source:HGNCSymbol;Acc:HGNC:15828]	51655	Q9Y272
ENSG00000109320	4	102501329	102617302	+	6257	NFKB1	GO:0000122;GO:0000122;GO:0000122;GO:0000976;GO:0000977;GO:0000980;GO:0000981;GO:0001227;GO:0001228;GO:0001818;GO:0002223;GO:0003677;GO:0003677;GO:0003677;GO:0003682;GO:0003700;GO:0003700;GO:0005515;GO:0005515;GO:0005515;GO:0005576;GO:0005634;GO:0005634;GO:0005634;GO:0005634;GO:0005634;GO:0005654;GO:0005654;GO:0005737;GO:0005737;GO:0005737;GO:0005739;GO:0005829;GO:0005829;GO:0005829;GO:0006355;GO:…	K02580	-	COG0666	R	nuclear factor kappa B subunit 1 [Source:HGNCSymbol;Acc:HGNC:7794]	4790	P19838;A0A024RDJ4
ENSG00000116016	2	46293667	46386703	+	7302	EPAS1	GO:0003700;GO:0005634;GO:0005634;GO:0005667;GO:0005737;GO:0006355;GO:0046983;GO:0000981;GO:0000981;GO:0001228;GO:0001525;GO:0001525;GO:0001666;GO:0001666;GO:0001892;GO:0001974;GO:0002027;GO:0003677;GO:0003677;GO:0003677;GO:0003700;GO:0003700;GO:0005515;GO:0005515;GO:0005515;GO:0005634;GO:0005634;GO:0005634;GO:0005634;GO:0005654;GO:0005667;GO:0005667;GO:0005667;GO:0005737;GO:0005737;GO:0005829;GO:…	K09095	-	NOG289264	-	endothelial PAS domain protein 1 [Source:HGNCSymbol;Acc:HGNC:3374]	2034	Q99814;B3KW07
ENSG00000118503	6	137867188	137883312	+	5051	TNFAIP3	GO:0001922;GO:0001922;GO:0002020;GO:0002237;GO:0002237;GO:0002634;GO:0002634;GO:0002677;GO:0003677;GO:0003677;GO:0003824;GO:0004842;GO:0004843;GO:0004843;GO:0004843;GO:0005515;GO:0005515;GO:0005515;GO:0005634;GO:0005634;GO:0005634;GO:0005737;GO:0005737;GO:0005737;GO:0005764;GO:0005829;GO:0006508;GO:0006915;GO:0006954;GO:0007010;GO:0008152;GO:0008233;GO:0008234;GO:0008270;GO:0010803;GO:0016477;GO:…	K11859	EC:3.4.19.12	NOG248343	-	TNF alpha induced protein 3 [Source:HGNCSymbol;Acc:HGNC:11896]	7128	P21580
ENSG00000118515	6	134169246	134318112	-	9992	SGK1	GO:0000166;GO:0001558;GO:0004672;GO:0004672;GO:0004674;GO:0004674;GO:0004674;GO:0004674;GO:0004674;GO:0004712;GO:0005246;GO:0005515;GO:0005515;GO:0005524;GO:0005524;GO:0005634;GO:0005634;GO:0005737;GO:0005737;GO:0005739;GO:0005783;GO:0005789;GO:0005829;GO:0005829;GO:0005886;GO:0006468;GO:0006468;GO:0006468;GO:0006814;GO:0006915;GO:0006974;GO:0007616;GO:0008217;GO:0015459;GO:0015459;GO:0016020;GO:…	K13302	EC:2.7.11.1	COG0515	T	serum/glucocorticoid regulated kinase 1[Source:HGNC Symbol;Acc:HGNC:10810]	6446	O00141
ENSG00000119508	9	99821855	99866891	+	6314	NR4A3	GO:0000122;GO:0000977;GO:0000978;GO:0000981;GO:0001228;GO:0001228;GO:0003677;GO:0003677;GO:0003700;GO:0003707;GO:0003707;GO:0004879;GO:0004879;GO:0005515;GO:0005515;GO:0005634;GO:0005634;GO:0005634;GO:0005654;GO:0005667;GO:0006355;GO:0006367;GO:0007369;GO:0008270;GO:0009444;GO:0010613;GO:0010828;GO:0019901;GO:0030522;GO:0032765;GO:0035259;GO:0035497;GO:0035726;GO:0038097;GO:0042629;GO:0042803;GO:…	K08559	-	NOG245120	-	nuclear receptor subfamily 4 group A member 3[Source:HGNC Symbol;Acc:HGNC:7982]	8013	Q92570;A0A024R168
ENSG00000120738	5	138465490	138469315	+	3138	EGR1	GO:0000122;GO:0000976;GO:0000977;GO:0000977;GO:0000981;GO:0000981;GO:0000981;GO:0001228;GO:0001666;GO:0001666;GO:0002931;GO:0002931;GO:0003676;GO:0003677;GO:0003677;GO:0003700;GO:0003700;GO:0005515;GO:0005515;GO:0005634;GO:0005634;GO:0005634;GO:0005634;GO:0005654;GO:0005654;GO:0005737;GO:0005737;GO:0006355;GO:0006357;GO:0006366;GO:0008270;GO:0009749;GO:0010385;GO:0010628;GO:0030217;GO:0030509;GO:…	K09203	-	COG5048	R	early growth response 1 [Source:HGNCSymbol;Acc:HGNC:3238]	1958	P18146;Q546S1
ENSG00000122877	10	62811996	62919900	-	3689	EGR2	GO:0000978;GO:0000981;GO:0000981;GO:0001102;GO:0001102;GO:0001228;GO:0003676;GO:0003677;GO:0003677;GO:0003682;GO:0003682;GO:0003700;GO:0003700;GO:0005515;GO:0005634;GO:0005634;GO:0005634;GO:0005634;GO:0005654;GO:0005737;GO:0005737;GO:0006355;GO:0006357;GO:0006366;GO:0006366;GO:0006611;GO:0006611;GO:0007420;GO:0007422;GO:0007611;GO:0007622;GO:0008045;GO:0014037;GO:0016740;GO:0016925;GO:0021569;GO:…	K12496	-	COG5048	R	early growth response 2 [Source:HGNCSymbol;Acc:HGNC:3239]	1959	P11161
ENSG00000123358	12	52022832	52059507	+	7295	NR4A1	GO:0003677;GO:0004879;GO:0005634;GO:0006355;GO:0030522;GO:0000977;GO:0000978;GO:0000981;GO:0001228;GO:0001228;GO:0001938;GO:0002042;GO:0003677;GO:0003677;GO:0003677;GO:0003677;GO:0003700;GO:0003707;GO:0004879;GO:0004879;GO:0005515;GO:0005634;GO:0005634;GO:0005634;GO:0005634;GO:0005634;GO:0005654;GO:0005667;GO:0005737;GO:0005829;GO:0006355;GO:0006367;GO:0007165;GO:0008270;GO:0030522;GO:0031965;GO:…	K04465	-	NOG245120	-	nuclear receptor subfamily 4 group A member 1[Source:HGNC Symbol;Acc:HGNC:7980]	3164	P22736;A0A024R126
ENSG00000124762	6	36676460	36687339	+	3050	CDKN1A	GO:0000079;GO:0000082;GO:0000082;GO:0000086;GO:0000307;GO:0004693;GO:0004860;GO:0004860;GO:0004861;GO:0004861;GO:0004861;GO:0004861;GO:0005515;GO:0005515;GO:0005634;GO:0005634;GO:0005634;GO:0005654;GO:0005654;GO:0005654;GO:0005730;GO:0005737;GO:0005829;GO:0006357;GO:0006367;GO:0006974;GO:0006977;GO:0006977;GO:0007049;GO:0007050;GO:0007050;GO:0007050;GO:0007265;GO:0007346;GO:0007507;GO:0008285;GO:…	K06625	-	NOG290902	-	cyclin dependent kinase inhibitor 1A [Source:HGNCSymbol;Acc:HGNC:1784]	1026	P38936;A0A024RCX5
ENSG00000128016	19	39406813	39409412	+	2010	ZFP36	GO:0000122;GO:0000165;GO:0000288;GO:0000289;GO:0003729;GO:0005515;GO:0005634;GO:0005737;GO:0005829;GO:0006357;GO:0009611;GO:0017091;GO:0030014;GO:0035278;GO:0035556;GO:0035925;GO:0038066;GO:0043488;GO:0044344;GO:0045085;GO:0045600;GO:0045638;GO:0046872;GO:0046872;GO:0050728;GO:0050779;GO:0060213;GO:0061014;GO:0061158;GO:0070063;GO:0071222;GO:0071356;GO:0071889;GO:1900153;GO:1904246;GO:1990904;GO:…	K15308	-	COG5063	R	ZFP36 ring finger protein [Source:HGNCSymbol;Acc:HGNC:12862]	7538	P26651;M0QY76
ENSG00000128342	22	30240447	30246851	-	3969	LIF	GO:0001974;GO:0005102;GO:0005125;GO:0005125;GO:0005125;GO:0005125;GO:0005125;GO:0005125;GO:0005146;GO:0005146;GO:0005146;GO:0005146;GO:0005515;GO:0005576;GO:0005576;GO:0005576;GO:0005615;GO:0005615;GO:0005615;GO:0005829;GO:0006955;GO:0007260;GO:0007275;GO:0007566;GO:0008083;GO:0008083;GO:0008083;GO:0008083;GO:0008083;GO:0008284;GO:0008284;GO:0008284;GO:0008284;GO:0008284;GO:0008285;GO:0010469;GO:…	K05419	-	NOG45686	-	LIF, interleukin 6 family cytokine [Source:HGNCSymbol;Acc:HGNC:6596]	3976	P15018
ENSG00000129757	11	2883213	2885773	-	2478	CDKN1C	GO:0000122;GO:0001501;GO:0001822;GO:0001890;GO:0004860;GO:0004860;GO:0004861;GO:0005515;GO:0005515;GO:0005634;GO:0005634;GO:0005634;GO:0005634;GO:0005737;GO:0007049;GO:0007050;GO:0007096;GO:0007346;GO:0007568;GO:0030099;GO:0030325;GO:0030511;GO:0033673;GO:0035264;GO:0042326;GO:0042326;GO:0042551;GO:0043010;GO:0044877;GO:0045736;GO:0045892;GO:0045893;GO:0050680;GO:0055123;GO:0060065;GO:0060669;GO:…	K09993	-	NOG245842	-	cyclin dependent kinase inhibitor 1C [Source:HGNCSymbol;Acc:HGNC:1786]	1028	P49918
ENSG00000134107	3	4979116	4985323	+	3837	BHLHE40	GO:0000122;GO:0000977;GO:0000978;GO:0000980;GO:0000981;GO:0000981;GO:0000981;GO:0001102;GO:0001102;GO:0001227;GO:0001227;GO:0001227;GO:0001756;GO:0003677;GO:0003677;GO:0003677;GO:0003700;GO:0003714;GO:0003714;GO:0003714;GO:0005515;GO:0005515;GO:0005634;GO:0005634;GO:0005634;GO:0005634;GO:0005737;GO:0006355;GO:0006355;GO:0007219;GO:0007623;GO:0008134;GO:0009416;GO:0016604;GO:0019904;GO:0030154;GO:…	K03729	-	NOG281955	-	basic helix-loop-helix family member e40[Source:HGNC Symbol;Acc:HGNC:1046]	8553	O14503;Q6IB83
ENSG00000144655	3	39141855	39154562	-	3214	CSRNP1	GO:0000981;GO:0001228;GO:0003674;GO:0003677;GO:0003700;GO:0003700;GO:0005515;GO:0005634;GO:0005634;GO:0006355;GO:0006915;GO:0009791;GO:0043565;GO:0045944;GO:0045944;GO:0048008;GO:0048705;GO:0060021;GO:0060325;GO:0000981;GO:0003674;GO:0003677;GO:0003700;GO:0005515;GO:0005634;GO:0006915;GO:0045944;	K17494	-	NOG150539	S	cysteine and serine rich nuclear protein 1[Source:HGNC Symbol;Acc:HGNC:14300]	64651	Q96S65;A0A024R2N7
ENSG00000146232	6	44258166	44265788	-	2581	NFKBIE	GO:0001650;GO:0005634;GO:0005829;GO:0001650;GO:0005515;GO:0005634;GO:0005737;GO:0005737;GO:0005794;GO:0005829;GO:0005829;GO:0042942;GO:0042994;GO:0048471;	K05872	-	COG0666	R	NFKB inhibitor epsilon [Source:HGNCSymbol;Acc:HGNC:7799]	4794	O00221;Q96F31;A0A024RD24
ENSG00000146592	7	28299321	28825894	+	11674	CREB5	GO:0000981;GO:0003676;GO:0003677;GO:0003700;GO:0003700;GO:0005515;GO:0005634;GO:0006355;GO:0006357;GO:0006366;GO:0045893;GO:0046872;GO:0070062;GO:0003676;GO:0000981;GO:0003676;GO:0003677;GO:0003700;GO:0003700;GO:0005515;GO:0005634;GO:0006355;GO:0006357;GO:0006366;GO:0045893;GO:0046872;GO:0070062;GO:0000981;GO:0003676;GO:0003677;GO:0003700;GO:0003700;GO:0005515;GO:0005634;GO:0006355;GO:0006357;GO:…	K09047	-	NOG286140	-	cAMP responsive element binding protein 5[Source:HGNC Symbol;Acc:HGNC:16844]	9586	Q02930
ENSG00000153162	6	7726797	7881422	+	2780	BMP6	GO:0000122;GO:0000122;GO:0001501;GO:0001503;GO:0001503;GO:0001649;GO:0001649;GO:0001654;GO:0001822;GO:0001938;GO:0001958;GO:0003323;GO:0005125;GO:0005125;GO:0005160;GO:0005576;GO:0005615;GO:0005615;GO:0005615;GO:0005737;GO:0006879;GO:0006879;GO:0006954;GO:0006955;GO:0007275;GO:0008083;GO:0008083;GO:0008083;GO:0008284;GO:0010039;GO:0010469;GO:0010862;GO:0010862;GO:0010862;GO:0010862;GO:0014823;GO:…	K16620	-	NOG272883	-	bone morphogenetic protein 6 [Source:HGNCSymbol;Acc:HGNC:1073]	654	P22004;Q4VBA3;B4DUF7
ENSG00000160888	19	13150415	13154908	+	3072	IER2	GO:0000977;GO:0001228;GO:0003677;GO:0005634;GO:0005654;GO:0005737;GO:0030182;GO:0045944;GO:0048870;GO:0071774;GO:0000977;GO:0001228;GO:0003677;GO:0005634;GO:0005654;GO:0005737;GO:0030182;GO:0045944;GO:0048870;GO:0071774;GO:0000977;GO:0001228;GO:0003677;GO:0005634;GO:0005654;GO:0005737;GO:0005737;GO:0030182;GO:0045944;GO:0048870;GO:0071774;	-	-	NOG40154	-	immediate early response 2 [Source:HGNCSymbol;Acc:HGNC:28871]	9592	Q9BTL4;A0A024R7H1
ENSG00000163874	1	37474552	37484379	+	3121	ZC3H12A	GO:0000294;GO:0000294;GO:0000932;GO:0001525;GO:0001933;GO:0001933;GO:0002230;GO:0002376;GO:0002757;GO:0003677;GO:0003682;GO:0003723;GO:0003729;GO:0003730;GO:0003730;GO:0004518;GO:0004518;GO:0004519;GO:0004521;GO:0004521;GO:0004532;GO:0004532;GO:0004540;GO:0004843;GO:0005515;GO:0005515;GO:0005634;GO:0005634;GO:0005654;GO:0005737;GO:0005737;GO:0005737;GO:0005783;GO:0005791;GO:0005791;GO:0005856;GO:…	K18668	EC:3.1.-.-	NOG259385	-	zinc finger CCCH-type containing 12A [Source:HGNCSymbol;Acc:HGNC:26259]	80149	Q5D1E8
ENSG00000170345	14	75278774	75282230	+	3238	FOS	GO:0000978;GO:0000978;GO:0000979;GO:0000981;GO:0001102;GO:0001228;GO:0001661;GO:0003677;GO:0003677;GO:0003677;GO:0003677;GO:0003682;GO:0003690;GO:0003700;GO:0003700;GO:0003700;GO:0003700;GO:0003700;GO:0005515;GO:0005634;GO:0005634;GO:0005634;GO:0005634;GO:0005634;GO:0005634;GO:0005634;GO:0005654;GO:0005654;GO:0005667;GO:0005667;GO:0005737;GO:0005783;GO:0005829;GO:0006306;GO:0006355;GO:0006355;GO:…	K04379	-	NOG258795	-	Fos proto-oncogene, AP-1 transcription factorsubunit [Source:HGNC Symbol;Acc:HGNC:3796]	2353	P01100;Q6FG41
ENSG00000170485	2	100820152	100996829	+	12491	NPAS2	GO:0000980;GO:0000981;GO:0003677;GO:0003677;GO:0003700;GO:0003700;GO:0005515;GO:0005634;GO:0005634;GO:0005654;GO:0005654;GO:0005667;GO:0005667;GO:0005737;GO:0005829;GO:0005829;GO:0006355;GO:0006974;GO:0007417;GO:0007623;GO:0019216;GO:0032922;GO:0045739;GO:0045893;GO:0045944;GO:0046872;GO:0046983;GO:0048511;GO:0051775;GO:0051879;GO:0060548;GO:2001020;GO:0003700;GO:0005634;GO:0005634;GO:0005667;GO:…	K09026	-	NOG300360	-	neuronal PAS domain protein 2 [Source:HGNCSymbol;Acc:HGNC:7895]	4862	Q99743;A2I2P5
ENSG00000171223	19	12791496	12793315	+	1820	JUNB	GO:0000122;GO:0000785;GO:0000790;GO:0000977;GO:0000978;GO:0000978;GO:0000981;GO:0000981;GO:0001228;GO:0001570;GO:0001649;GO:0001701;GO:0001829;GO:0003677;GO:0003677;GO:0003677;GO:0003677;GO:0003700;GO:0003713;GO:0003713;GO:0003714;GO:0005515;GO:0005634;GO:0005654;GO:0005654;GO:0005654;GO:0005667;GO:0006355;GO:0006355;GO:0006357;GO:0006357;GO:0008134;GO:0009314;GO:0009612;GO:0009987;GO:0010033;GO:…	K09028	-	NOG283376	-	JunB proto-oncogene, AP-1 transcription factorsubunit [Source:HGNC Symbol;Acc:HGNC:6205]	3726	P17275;Q5U079
ENSG00000175592	11	65892049	65900573	-	1887	FOSL1	GO:0000978;GO:0000978;GO:0000981;GO:0003677;GO:0003677;GO:0003700;GO:0003700;GO:0005515;GO:0005634;GO:0005634;GO:0005634;GO:0005634;GO:0005654;GO:0006355;GO:0006357;GO:0006357;GO:0006366;GO:0006935;GO:0006968;GO:0008284;GO:0009615;GO:0061614;GO:2000144;GO:0000977;GO:0000978;GO:0000978;GO:0000978;GO:0000981;GO:0001228;GO:0001701;GO:0003677;GO:0003677;GO:0003677;GO:0003700;GO:0003700;GO:0005515;GO:…	K04502	-	NOG252534	-	FOS like 1, AP-1 transcription factor subunit[Source:HGNC Symbol;Acc:HGNC:13718]	8061	P15407;A0A0S2Z595
ENSG00000175832	17	43527844	43579620	-	3607	ETV4	GO:0000978;GO:0000981;GO:0000981;GO:0001228;GO:0003677;GO:0003700;GO:0005515;GO:0005634;GO:0005634;GO:0005634;GO:0005654;GO:0005730;GO:0006355;GO:0006357;GO:0030154;GO:0043565;GO:0045944;GO:0000978;GO:0000981;GO:0000981;GO:0001228;GO:0003677;GO:0003700;GO:0005515;GO:0005634;GO:0005634;GO:0005634;GO:0005654;GO:0005730;GO:0006355;GO:0006357;GO:0030154;GO:0043565;GO:0045944;GO:0000978;GO:0000981;GO:…	K15592	-	NOG258471	-	ETS variant 4 [Source:HGNC Symbol;Acc:HGNC:3493]	2118	P43268
ENSG00000197019	19	40421592	40426025	-	2114	SERTAD1	GO:0000079;GO:0005515;GO:0005634;GO:0005634;GO:0005737;GO:0005737;GO:0008284;GO:0030308;GO:0045893;GO:0045944;	-	-	NOG41149	R	SERTA domain containing 1 [Source:HGNCSymbol;Acc:HGNC:17932]	29950	Q9UHV2;Q53GC0
ENSG00000198879	10	7158624	7411486	-	9953	SFMBT2	GO:0003714;GO:0005515;GO:0005634;GO:0005634;GO:0006355;GO:0010629;GO:0016235;GO:0016607;GO:0042393;GO:0042393;GO:0043231;GO:1903507;GO:0003714;GO:0005515;GO:0005634;GO:0005634;GO:0006355;GO:0010629;GO:0016235;GO:0016607;GO:0042393;GO:0042393;GO:0043231;GO:1903507;GO:0005634;GO:0006355;GO:0005634;GO:0006355;	-	-	NOG316861	-	Scm like with four mbt domains 2 [Source:HGNCSymbol;Acc:HGNC:20256]	57713	Q5VUG0
ENSG00000198947	X	31097677	33339441	-	18910	DMD	GO:0002027;GO:0002162;GO:0002162;GO:0003779;GO:0003779;GO:0003779;GO:0005200;GO:0005515;GO:0005515;GO:0005515;GO:0005737;GO:0005829;GO:0005856;GO:0005856;GO:0005886;GO:0007010;GO:0007517;GO:0008270;GO:0008307;GO:0009986;GO:0010880;GO:0010881;GO:0014809;GO:0014819;GO:0016010;GO:0016013;GO:0016020;GO:0016328;GO:0017022;GO:0017166;GO:0030018;GO:0030049;GO:0030054;GO:0030055;GO:0030175;GO:0031527;GO:…	K10366	-	COG5069	Z	dystrophin [Source:HGNC Symbol;Acc:HGNC:2928]	1756	P11532
ENSG00000232810	6	31575567	31578336	+	1676	TNF	GO:0000060;GO:0000122;GO:0000122;GO:0000122;GO:0000165;GO:0000185;GO:0000187;GO:0000977;GO:0001774;GO:0001819;GO:0001891;GO:0001891;GO:0001932;GO:0001934;GO:0001934;GO:0001937;GO:0002020;GO:0002020;GO:0002439;GO:0002740;GO:0002876;GO:0002925;GO:0005125;GO:0005125;GO:0005125;GO:0005164;GO:0005164;GO:0005164;GO:0005164;GO:0005515;GO:0005515;GO:0005576;GO:0005576;GO:0005615;GO:0005615;GO:0005615;GO:…	K03156	-	NOG40413	-	tumor necrosis factor [Source:HGNCSymbol;Acc:HGNC:11892]	7124	P01375;Q5STB3
ENSG00000244405	3	186046308	186110318	-	5802	ETV5	GO:0000977;GO:0000981;GO:0000981;GO:0001228;GO:0003677;GO:0003677;GO:0003700;GO:0003700;GO:0003700;GO:0005515;GO:0005634;GO:0005634;GO:0005634;GO:0005654;GO:0005886;GO:0006355;GO:0006357;GO:0007274;GO:0007626;GO:0030154;GO:0034599;GO:0043565;GO:0044212;GO:0045666;GO:0045893;GO:0045944;GO:0048133;GO:0050807;GO:0060252;GO:0060762;GO:0071340;GO:0000977;GO:0000981;GO:0000981;GO:0001228;GO:0003677;GO:…	K15593	-	NOG258471	-	ETS variant 5 [Source:HGNC Symbol;Acc:HGNC:3494]	2119	P41161
ENSG00000115738	2	8678845	8684453	+	2205	ID2	GO:0000122;GO:0000981;GO:0001085;GO:0001656;GO:0001779;GO:0001966;GO:0002521;GO:0003149;GO:0003166;GO:0003700;GO:0005515;GO:0005515;GO:0005634;GO:0005634;GO:0005634;GO:0005634;GO:0005634;GO:0005634;GO:0005737;GO:0005737;GO:0005737;GO:0005737;GO:0005737;GO:0005829;GO:0007275;GO:0007275;GO:0007507;GO:0007623;GO:0007623;GO:0008134;GO:0008344;GO:0009649;GO:0010628;GO:0010628;GO:0010629;GO:0010629;GO:…	K17693	-	NOG76382	T	inhibitor of DNA binding 2 [Source:HGNCSymbol;Acc:HGNC:5361]	3398	Q02363;Q53T66
ENSG00000132749	11	68707440	68751564	-	5833	TESMIN	GO:0005634;GO:0005634;GO:0005737;GO:0005737;GO:0006875;GO:0007275;GO:0007283;GO:0010038;GO:0030154;GO:0046872;GO:0005634;GO:0005737;GO:0006875;GO:0007275;GO:0007283;GO:0010038;GO:0030154;GO:0046872;GO:0005634;GO:0005737;GO:0006875;GO:0007275;GO:0007283;GO:0010038;GO:0030154;GO:0046872;	-	-	NOG303998	-	testis expressed metallothionein like protein[Source:HGNC Symbol;Acc:HGNC:7446]	9633	Q9Y4I5
ENSG00000171604	5	139647299	139683882	+	3852	CXXC5	GO:0000122;GO:0003677;GO:0005515;GO:0005634;GO:0005654;GO:0005654;GO:0005737;GO:0005829;GO:0008134;GO:0008270;GO:0043123;GO:0043565;GO:0046872;GO:0000122;GO:0003677;GO:0005515;GO:0005634;GO:0005654;GO:0005654;GO:0005737;GO:0005829;GO:0008134;GO:0008270;GO:0043123;GO:0043565;GO:0046872;GO:0005654;GO:0005829;GO:0005654;GO:0005829;	K22760	-	NOG87017	S	CXXC finger protein 5 [Source:HGNCSymbol;Acc:HGNC:26943]	51523	Q7LFL8
ENSG00000180573	6	26124145	26139116	+	1668	HIST1H2AC	GO:0000786;GO:0000786;GO:0000790;GO:0003674;GO:0003677;GO:0003677;GO:0003677;GO:0005634;GO:0005634;GO:0005654;GO:0005694;GO:0006325;GO:0008285;GO:0046982;GO:0070062;GO:0000786;GO:0000786;GO:0000790;GO:0003674;GO:0003677;GO:0003677;GO:0003677;GO:0005634;GO:0005634;GO:0005654;GO:0005694;GO:0006325;GO:0008285;GO:0046982;GO:0070062;GO:0000786;GO:0000786;GO:0000790;GO:0003674;GO:0003677;GO:0003677;GO:…	K11251	-	COG5262	B	histone cluster 1 H2A family member c [Source:HGNCSymbol;Acc:HGNC:4733]	8334	Q93077;A0A024R017
ENSG00000184574	12	6618835	6636447	-	3258	LPAR5	GO:0003674;GO:0004930;GO:0004930;GO:0005575;GO:0005886;GO:0005886;GO:0007165;GO:0007186;GO:0007186;GO:0007186;GO:0008150;GO:0016020;GO:0016021;GO:0016021;GO:0003674;GO:0004930;GO:0004930;GO:0005575;GO:0005886;GO:0005886;GO:0007165;GO:0007186;GO:0007186;GO:0007186;GO:0008150;GO:0016020;GO:0016021;GO:0016021;	K08390	-	NOG146804	S	lysophosphatidic acid receptor 5 [Source:HGNCSymbol;Acc:HGNC:13307]	57121	Q9H1C0;Q5KU18
ENSG00000187634	1	923928	944581	+	4166	SAMD11	GO:0003677;GO:0005634;	-	-	NOG81597	S	sterile alpha motif domain containing 11[Source:HGNC Symbol;Acc:HGNC:28706]	148398	Q96NU1
ENSG00000204060	1	41361922	41383590	+	2398	FOXO6	GO:0000122;GO:0000981;GO:0000981;GO:0000981;GO:0000981;GO:0003677;GO:0003700;GO:0003700;GO:0005515;GO:0005634;GO:0005634;GO:0005634;GO:0005634;GO:0005737;GO:0005737;GO:0005737;GO:0005737;GO:0006355;GO:0006357;GO:0006357;GO:0007613;GO:0008134;GO:0008286;GO:0042593;GO:0043565;GO:0043565;GO:0045944;GO:0060999;GO:0060999;	-	-	-	-	forkhead box O6 [Source:HGNCSymbol;Acc:HGNC:24814]	-	-
ENSG00000108984	17	69414698	69553861	+	16655	MAP2K6	GO:0000165;GO:0000166;GO:0000187;GO:0000187;GO:0000187;GO:0000187;GO:0001934;GO:0002931;GO:0004672;GO:0004674;GO:0004674;GO:0004674;GO:0004708;GO:0004708;GO:0004708;GO:0004708;GO:0004708;GO:0004713;GO:0005515;GO:0005515;GO:0005524;GO:0005524;GO:0005634;GO:0005634;GO:0005654;GO:0005737;GO:0005737;GO:0005829;GO:0005829;GO:0005856;GO:0006468;GO:0006468;GO:0006915;GO:0006915;GO:0006975;GO:0007050;GO:…	K04433	EC:2.7.12.2	COG0515	T	mitogen-activated protein kinase kinase 6[Source:HGNC Symbol;Acc:HGNC:6846]	5608	P52564;A8K3Y2
ENSG00000113721	5	150113837	150155872	-	7137	PDGFRB	GO:0000165;GO:0000166;GO:0002244;GO:0004672;GO:0004713;GO:0004713;GO:0004713;GO:0004714;GO:0004714;GO:0004714;GO:0004992;GO:0005017;GO:0005017;GO:0005017;GO:0005019;GO:0005019;GO:0005019;GO:0005019;GO:0005088;GO:0005102;GO:0005161;GO:0005515;GO:0005515;GO:0005515;GO:0005524;GO:0005524;GO:0005634;GO:0005634;GO:0005737;GO:0005737;GO:0005764;GO:0005794;GO:0005886;GO:0005886;GO:0005886;GO:0005887;GO:…	K05089	EC:2.7.10.1	COG0515	T	platelet derived growth factor receptor beta[Source:HGNC Symbol;Acc:HGNC:8804]	5159	P09619;Q59F04
ENSG00000120899	8	27311482	27459391	+	7933	PTK2B	GO:0000165;GO:0000166;GO:0000302;GO:0001525;GO:0001525;GO:0001525;GO:0001556;GO:0001666;GO:0001954;GO:0002040;GO:0002040;GO:0002250;GO:0002315;GO:0002315;GO:0002376;GO:0002688;GO:0004672;GO:0004672;GO:0004683;GO:0004683;GO:0004713;GO:0004713;GO:0004713;GO:0004713;GO:0004715;GO:0004715;GO:0004715;GO:0004715;GO:0004715;GO:0004715;GO:0004972;GO:0004972;GO:0005515;GO:0005515;GO:0005524;GO:0005524;GO:…	K05871	EC:2.7.10.2	COG0515	T	protein tyrosine kinase 2 beta [Source:HGNCSymbol;Acc:HGNC:9612]	2185	Q14289
ENSG00000010319	3	52433053	52445085	-	5011	SEMA3G	GO:0001755;GO:0005102;GO:0005102;GO:0005576;GO:0005615;GO:0005887;GO:0030215;GO:0030335;GO:0030517;GO:0030517;GO:0038191;GO:0045499;GO:0048843;GO:0050919;GO:0070062;GO:0071526;	K06840	-	NOG265742	-	semaphorin 3G [Source:HGNC Symbol;Acc:HGNC:30400]	56920	Q9NS98
ENSG00000106003	7	2512529	2529177	+	3418	LFNG	GO:0000139;GO:0001756;GO:0002315;GO:0003674;GO:0005576;GO:0005794;GO:0007275;GO:0007389;GO:0008375;GO:0008593;GO:0008593;GO:0009887;GO:0014807;GO:0016020;GO:0016020;GO:0016021;GO:0016740;GO:0016757;GO:0016757;GO:0030173;GO:0030217;GO:0033829;GO:0033829;GO:0033829;GO:0036066;GO:0036066;GO:0046872;GO:1902367;GO:1903561;GO:0000139;GO:0001756;GO:0002315;GO:0003674;GO:0005576;GO:0005794;GO:0007275;GO:…	K05948	EC:2.4.1.222	NOG70217	-	LFNG O-fucosylpeptide 3-beta-N-acetylglucosaminyltransferase [Source:HGNCSymbol;Acc:HGNC:6560]	3955	Q8NES3
ENSG00000134215	1	107571160	107965144	-	7271	VAV3	GO:0001525;GO:0005070;GO:0005085;GO:0005085;GO:0005085;GO:0005085;GO:0005089;GO:0005089;GO:0005089;GO:0005096;GO:0005154;GO:0005515;GO:0005737;GO:0005829;GO:0005886;GO:0006906;GO:0006974;GO:0007186;GO:0007229;GO:0007264;GO:0007264;GO:0008361;GO:0009967;GO:0016477;GO:0030031;GO:0030032;GO:0030168;GO:0030593;GO:0030676;GO:0030890;GO:0035023;GO:0035556;GO:0038095;GO:0038096;GO:0042493;GO:0043065;GO:…	K05730	-	NOG326494	-	vav guanine nucleotide exchange factor 3[Source:HGNC Symbol;Acc:HGNC:12659]	10451	Q9UKW4
ENSG00000139187	12	8950044	9010760	+	2598	KLRG1	GO:0016020;GO:0016021;GO:0030246;GO:0002376;GO:0005515;GO:0005515;GO:0005886;GO:0006954;GO:0006968;GO:0007166;GO:0016020;GO:0016021;GO:0016021;GO:0030246;GO:0030246;GO:0030246;GO:0038023;GO:0043231;GO:0043231;GO:0045087;GO:0002376;GO:0005515;GO:0005515;GO:0005886;GO:0006954;GO:0006968;GO:0007166;GO:0016020;GO:0016021;GO:0016021;GO:0030246;GO:0030246;GO:0030246;GO:0038023;GO:0043231;GO:0043231;GO:…	K10076	-	NOG283577	-	killer cell lectin like receptor G1 [Source:HGNCSymbol;Acc:HGNC:6380]	10219	Q96E93
ENSG00000155792	8	119873717	120050913	+	2622	DEPTOR	GO:0005515;GO:0005515;GO:0005622;GO:0006469;GO:0006469;GO:0032007;GO:0032007;GO:0035556;GO:0045792;GO:2001236;GO:0005515;GO:0005515;GO:0005622;GO:0006469;GO:0006469;GO:0032007;GO:0032007;GO:0035556;GO:0045792;GO:2001236;	K20402	-	NOG125414	R	DEP domain containing MTOR interacting protein[Source:HGNC Symbol;Acc:HGNC:22953]	64798	Q8TB45
ENSG00000165409	14	80954989	81146302	+	9909	TSHR	GO:0004930;GO:0004930;GO:0004996;GO:0004996;GO:0005886;GO:0005886;GO:0007165;GO:0007186;GO:0007186;GO:0007189;GO:0008344;GO:0016020;GO:0016021;GO:0016021;GO:0016500;GO:0030183;GO:0038194;GO:0040012;GO:0040018;GO:0060119;GO:0060122;GO:0071542;GO:0090103;GO:0120162;GO:0004930;GO:0004930;GO:0004996;GO:0004996;GO:0004996;GO:0004996;GO:0005515;GO:0005515;GO:0005886;GO:0005886;GO:0005887;GO:0005887;GO:…	K04249	-	NOG285844	-	thyroid stimulating hormone receptor [Source:HGNCSymbol;Acc:HGNC:12373]	7253	P16473;A0A0A0MTJ0
ENSG00000196159	4	125316399	125492932	+	16439	FAT4	GO:0001658;GO:0001822;GO:0003007;GO:0005509;GO:0005515;GO:0005886;GO:0007009;GO:0007155;GO:0007155;GO:0007156;GO:0007157;GO:0007157;GO:0007219;GO:0008543;GO:0016020;GO:0016020;GO:0016021;GO:0021987;GO:0021987;GO:0022008;GO:0022008;GO:0035329;GO:0035329;GO:0043931;GO:0045177;GO:0048565;GO:0060122;GO:0070062;GO:0072006;GO:0072137;GO:0072307;GO:0005509;GO:0005515;GO:0005886;GO:0007155;GO:0007155;GO:…	K16669	-	NOG12793	-	FAT atypical cadherin 4 [Source:HGNCSymbol;Acc:HGNC:23109]	79633	Q6V0I7;B3KU84
ENSG00000138639	4	85475114	86002670	+	7908	ARHGAP24	GO:0001525;GO:0005096;GO:0005096;GO:0005515;GO:0005737;GO:0005829;GO:0005856;GO:0005912;GO:0005925;GO:0007165;GO:0007275;GO:0030054;GO:0030154;GO:0042995;GO:0043547;GO:0051056;GO:0001525;GO:0005096;GO:0005096;GO:0005515;GO:0005737;GO:0005829;GO:0005856;GO:0005912;GO:0005925;GO:0007165;GO:0007275;GO:0030054;GO:0030154;GO:0042995;GO:0043547;GO:0051056;GO:0007165;GO:0001525;GO:0005096;GO:0005096;GO:…	K20642	-	NOG246008	-	Rho GTPase activating protein 24 [Source:HGNCSymbol;Acc:HGNC:25361]	83478	Q8N264
ENSG00000146376	6	129576132	129710225	-	4640	ARHGAP18	GO:0005096;GO:0005096;GO:0005096;GO:0005096;GO:0005737;GO:0005737;GO:0005829;GO:0005829;GO:0005886;GO:0007165;GO:0007264;GO:0008360;GO:0016607;GO:0030833;GO:0030833;GO:0032956;GO:0032956;GO:0043547;GO:0045296;GO:0051056;GO:0051056;GO:0051056;GO:2000145;	K20639	-	NOG329973	-	Rho GTPase activating protein 18 [Source:HGNCSymbol;Acc:HGNC:21035]	93663	Q8N392
ENSG00000186897	12	49332411	49337188	-	2071	C1QL4	GO:0005576;GO:0005581;GO:0005615;GO:0042802;GO:0045599;GO:0048147;GO:0070373;	-	-	NOG38862	O	complement C1q like 4 [Source:HGNCSymbol;Acc:HGNC:31416]	338761	Q86Z23;A0A3B0INP7

## Sheet: 0h_vs_12h.DESeq.Up
ID	Chromosome	Start Site	End Site	Direction	Length	Name	GO	KEGG	EC	eggNOG Class	eggNOG	Description	NCBI	UniProtID
ENSG00000006327	16	3018445	3022383	+	1848	TNFRSF12A	GO:0016020;GO:0016021;GO:0001525;GO:0001726;GO:0005515;GO:0005515;GO:0005886;GO:0005886;GO:0006915;GO:0006931;GO:0007155;GO:0007155;GO:0007275;GO:0009986;GO:0016020;GO:0016021;GO:0030154;GO:0033209;GO:0043065;GO:0045765;GO:0045773;GO:0061041;GO:0097191;GO:2001238;GO:0001525;GO:0005515;GO:0005515;GO:0005886;GO:0006915;GO:0007155;GO:0007275;GO:0016020;GO:0016021;GO:0030154;GO:0033209;GO:0043065;GO:…	K05149	-	NOG39144	T	TNF receptor superfamily member 12A [Source:HGNCSymbol;Acc:HGNC:18152]	51330	Q9NP84
ENSG00000031081	3	119294373	119420714	+	9384	ARHGAP31	GO:0005096;GO:0005096;GO:0005096;GO:0005096;GO:0005829;GO:0005925;GO:0007165;GO:0007264;GO:0007264;GO:0017124;GO:0030027;GO:0030027;GO:0030027;GO:0030054;GO:0042995;GO:0043547;GO:0051056;GO:0007165;	K20646	-	NOG283916	-	Rho GTPase activating protein 31 [Source:HGNCSymbol;Acc:HGNC:29216]	57514	Q2M1Z3
ENSG00000056558	9	120902393	120929173	-	6449	TRAF1	GO:0005164;GO:0005164;GO:0005164;GO:0005515;GO:0005515;GO:0005737;GO:0005829;GO:0006915;GO:0007165;GO:0008270;GO:0010803;GO:0031625;GO:0031625;GO:0031996;GO:0031996;GO:0032991;GO:0042802;GO:0042981;GO:0051092;GO:0065003;GO:2001236;GO:0005164;GO:0005164;GO:0005164;GO:0005515;GO:0005515;GO:0005737;GO:0005829;GO:0006915;GO:0007165;GO:0008270;GO:0010803;GO:0031625;GO:0031625;GO:0031996;GO:0031996;GO:…	K03172	-	NOG264247	-	TNF receptor associated factor 1 [Source:HGNCSymbol;Acc:HGNC:12031]	7185	Q13077
ENSG00000057657	6	106086320	106109939	+	6392	PRDM1	GO:0000122;GO:0000122;GO:0000977;GO:0000978;GO:0000981;GO:0001227;GO:0001227;GO:0002250;GO:0002376;GO:0003676;GO:0003677;GO:0003700;GO:0003700;GO:0005515;GO:0005634;GO:0005634;GO:0005654;GO:0005737;GO:0005737;GO:0008168;GO:0016740;GO:0031490;GO:0032259;GO:0032823;GO:0033082;GO:0042826;GO:0043565;GO:0045087;GO:0045165;GO:0046872;GO:0051136;GO:1990841;GO:0000122;GO:0000122;GO:0000122;GO:0000977;GO:…	-	-	COG5048	R	PR/SET domain 1 [Source:HGNC Symbol;Acc:HGNC:9346]	639	O75626
ENSG00000062038	16	68636189	68722616	+	6236	CDH3	GO:0000902;GO:0001895;GO:0003674;GO:0005509;GO:0005509;GO:0005737;GO:0005737;GO:0005886;GO:0005886;GO:0005886;GO:0005886;GO:0005886;GO:0005886;GO:0005913;GO:0005913;GO:0007043;GO:0007155;GO:0007155;GO:0007155;GO:0007156;GO:0007156;GO:0007601;GO:0008092;GO:0009986;GO:0010628;GO:0010838;GO:0016020;GO:0016020;GO:0016021;GO:0016339;GO:0016342;GO:0022405;GO:0031424;GO:0032773;GO:0032912;GO:0034332;GO:…	K06796	-	NOG328838	-	cadherin 3 [Source:HGNC Symbol;Acc:HGNC:1762]	1001	P22223
ENSG00000069399	19	44747705	44760044	+	3242	BCL3	GO:0000060;GO:0002268;GO:0002315;GO:0002455;GO:0002467;GO:0003677;GO:0003700;GO:0005515;GO:0005515;GO:0005634;GO:0005654;GO:0005737;GO:0005829;GO:0005886;GO:0006351;GO:0006974;GO:0007249;GO:0008134;GO:0009615;GO:0010225;GO:0019730;GO:0030198;GO:0030330;GO:0030496;GO:0030674;GO:0032729;GO:0032991;GO:0032996;GO:0033257;GO:0042088;GO:0042536;GO:0042742;GO:0042771;GO:0042832;GO:0042981;GO:0043066;GO:…	K09258	-	COG0666	R	B cell CLL/lymphoma 3 [Source:HGNCSymbol;Acc:HGNC:998]	602	P20749
ENSG00000074416	3	127689062	128052190	-	11849	MGLL	GO:0005654;GO:0004622;GO:0005654;GO:0005737;GO:0005789;GO:0005829;GO:0005886;GO:0006629;GO:0006629;GO:0006631;GO:0006633;GO:0006954;GO:0009966;GO:0009966;GO:0016020;GO:0016020;GO:0016042;GO:0016787;GO:0019369;GO:0019433;GO:0019898;GO:0036155;GO:0042803;GO:0046464;GO:0047372;GO:0047372;GO:0047372;GO:0050727;GO:0051930;GO:0052689;GO:2000124;GO:0004622;GO:0005654;GO:0005737;GO:0005789;GO:0005829;GO:…	K01054	EC:3.1.1.23	COG2267	I	monoglyceride lipase [Source:HGNCSymbol;Acc:HGNC:17038]	11343	Q99685
ENSG00000106089	7	73699206	73719672	-	3693	STX1A	GO:0000149;GO:0000149;GO:0000149;GO:0000149;GO:0001956;GO:0001956;GO:0005484;GO:0005484;GO:0005515;GO:0005515;GO:0005515;GO:0005576;GO:0005623;GO:0005829;GO:0005886;GO:0005886;GO:0005886;GO:0005886;GO:0005886;GO:0005886;GO:0005887;GO:0006836;GO:0006886;GO:0006886;GO:0006887;GO:0006887;GO:0006906;GO:0008021;GO:0008021;GO:0008076;GO:0008076;GO:0009629;GO:0010701;GO:0010701;GO:0010807;GO:0012505;GO:…	K04560	-	COG5074	U	syntaxin 1A [Source:HGNC Symbol;Acc:HGNC:11433]	6804	Q16623;Q75ME0
ENSG00000109321	4	74445134	74455009	+	1648	AREG	GO:0000139;GO:0005125;GO:0005154;GO:0005154;GO:0005515;GO:0005615;GO:0005615;GO:0005615;GO:0005615;GO:0005615;GO:0005634;GO:0005737;GO:0005789;GO:0006888;GO:0007173;GO:0007173;GO:0007173;GO:0007186;GO:0007267;GO:0008083;GO:0008083;GO:0008083;GO:0008083;GO:0008283;GO:0008284;GO:0008284;GO:0008284;GO:0008284;GO:0009986;GO:0010469;GO:0012507;GO:0014009;GO:0014070;GO:0016020;GO:0016021;GO:0031175;GO:…	K09782	-	NOG41450	-	amphiregulin [Source:HGNC Symbol;Acc:HGNC:651]	374	P15514
ENSG00000113070	5	140332843	140346631	-	3018	HBEGF	GO:0000165;GO:0004713;GO:0005088;GO:0005154;GO:0005154;GO:0005154;GO:0005154;GO:0005576;GO:0005576;GO:0005615;GO:0005615;GO:0005615;GO:0005615;GO:0005886;GO:0005886;GO:0005887;GO:0005887;GO:0005887;GO:0005887;GO:0007165;GO:0007173;GO:0007173;GO:0007173;GO:0007173;GO:0007517;GO:0008016;GO:0008083;GO:0008083;GO:0008083;GO:0008083;GO:0008201;GO:0008201;GO:0008201;GO:0008284;GO:0008284;GO:0009986;GO:…	K08523	-	NOG45526	R	heparin binding EGF like growth factor [Source:HGNCSymbol;Acc:HGNC:3059]	1839	Q99075
ENSG00000118503	6	137867188	137883312	+	5051	TNFAIP3	GO:0001922;GO:0001922;GO:0002020;GO:0002237;GO:0002237;GO:0002634;GO:0002634;GO:0002677;GO:0003677;GO:0003677;GO:0003824;GO:0004842;GO:0004843;GO:0004843;GO:0004843;GO:0005515;GO:0005515;GO:0005515;GO:0005634;GO:0005634;GO:0005634;GO:0005737;GO:0005737;GO:0005737;GO:0005764;GO:0005829;GO:0006508;GO:0006915;GO:0006954;GO:0007010;GO:0008152;GO:0008233;GO:0008234;GO:0008270;GO:0010803;GO:0016477;GO:…	K11859	EC:3.4.19.12	NOG248343	-	TNF alpha induced protein 3 [Source:HGNCSymbol;Acc:HGNC:11896]	7128	P21580
ENSG00000118515	6	134169246	134318112	-	9992	SGK1	GO:0000166;GO:0001558;GO:0004672;GO:0004672;GO:0004674;GO:0004674;GO:0004674;GO:0004674;GO:0004674;GO:0004712;GO:0005246;GO:0005515;GO:0005515;GO:0005524;GO:0005524;GO:0005634;GO:0005634;GO:0005737;GO:0005737;GO:0005739;GO:0005783;GO:0005789;GO:0005829;GO:0005829;GO:0005886;GO:0006468;GO:0006468;GO:0006468;GO:0006814;GO:0006915;GO:0006974;GO:0007616;GO:0008217;GO:0015459;GO:0015459;GO:0016020;GO:…	K13302	EC:2.7.11.1	COG0515	T	serum/glucocorticoid regulated kinase 1[Source:HGNC Symbol;Acc:HGNC:10810]	6446	O00141
ENSG00000120738	5	138465490	138469315	+	3138	EGR1	GO:0000122;GO:0000976;GO:0000977;GO:0000977;GO:0000981;GO:0000981;GO:0000981;GO:0001228;GO:0001666;GO:0001666;GO:0002931;GO:0002931;GO:0003676;GO:0003677;GO:0003677;GO:0003700;GO:0003700;GO:0005515;GO:0005515;GO:0005634;GO:0005634;GO:0005634;GO:0005634;GO:0005654;GO:0005654;GO:0005737;GO:0005737;GO:0006355;GO:0006357;GO:0006366;GO:0008270;GO:0009749;GO:0010385;GO:0010628;GO:0030217;GO:0030509;GO:…	K09203	-	COG5048	R	early growth response 1 [Source:HGNCSymbol;Acc:HGNC:3238]	1958	P18146;Q546S1
ENSG00000120833	12	93569814	93583487	+	6776	SOCS2	GO:0001558;GO:0001558;GO:0005070;GO:0005131;GO:0005159;GO:0005159;GO:0005515;GO:0005737;GO:0005737;GO:0005829;GO:0005942;GO:0007259;GO:0008269;GO:0008269;GO:0009966;GO:0009967;GO:0009968;GO:0016567;GO:0032355;GO:0032870;GO:0035556;GO:0038111;GO:0040008;GO:0043066;GO:0043551;GO:0043687;GO:0046426;GO:0046627;GO:0046854;GO:0046935;GO:0060396;GO:0001558;GO:0001558;GO:0005070;GO:0005131;GO:0005159;GO:…	-	-	NOG320153	-	suppressor of cytokine signaling 2 [Source:HGNCSymbol;Acc:HGNC:19382]	-	-
ENSG00000120875	8	29333064	29350668	-	7257	DUSP4	GO:0000188;GO:0000188;GO:0004721;GO:0004725;GO:0004725;GO:0004725;GO:0005515;GO:0005634;GO:0005634;GO:0005654;GO:0005654;GO:0005737;GO:0006470;GO:0008138;GO:0008138;GO:0008330;GO:0016311;GO:0016311;GO:0016787;GO:0016791;GO:0016791;GO:0017017;GO:0017017;GO:0035335;GO:0035970;GO:0070373;GO:1990439;GO:0000188;GO:0000188;GO:0004721;GO:0004725;GO:0004725;GO:0004725;GO:0005515;GO:0005634;GO:0005634;GO:…	K04459	-	COG2453	T	dual specificity phosphatase 4 [Source:HGNCSymbol;Acc:HGNC:3070]	1846	Q13115
ENSG00000122733	9	34957608	34982544	+	5813	PHF24	GO:0007214;GO:0008277;GO:0032228;GO:0046872;GO:0050966;	-	-	NOG25876	-	PHD finger protein 24 [Source:HGNCSymbol;Acc:HGNC:29180]	23349	Q9UPV7
ENSG00000124493	6	34018645	34155622	-	16300	GRM4	GO:0000187;GO:0004930;GO:0004930;GO:0005622;GO:0005886;GO:0005886;GO:0005887;GO:0005887;GO:0005887;GO:0007165;GO:0007186;GO:0007186;GO:0007186;GO:0007196;GO:0007196;GO:0007216;GO:0007268;GO:0007269;GO:0008066;GO:0008066;GO:0016020;GO:0016021;GO:0016021;GO:0031410;GO:0042734;GO:0043410;GO:0043523;GO:0051966;GO:0004930;GO:0004930;GO:0005886;GO:0007165;GO:0007186;GO:0007186;GO:0016020;GO:0016021;GO:…	K04607	-	NOG295200	-	glutamate metabotropic receptor 4 [Source:HGNCSymbol;Acc:HGNC:4596]	2914	Q14833;A1L4F9
ENSG00000128342	22	30240447	30246851	-	3969	LIF	GO:0001974;GO:0005102;GO:0005125;GO:0005125;GO:0005125;GO:0005125;GO:0005125;GO:0005125;GO:0005146;GO:0005146;GO:0005146;GO:0005146;GO:0005515;GO:0005576;GO:0005576;GO:0005576;GO:0005615;GO:0005615;GO:0005615;GO:0005829;GO:0006955;GO:0007260;GO:0007275;GO:0007566;GO:0008083;GO:0008083;GO:0008083;GO:0008083;GO:0008083;GO:0008284;GO:0008284;GO:0008284;GO:0008284;GO:0008284;GO:0008285;GO:0010469;GO:…	K05419	-	NOG45686	-	LIF, interleukin 6 family cytokine [Source:HGNCSymbol;Acc:HGNC:6596]	3976	P15018
ENSG00000129757	11	2883213	2885773	-	2478	CDKN1C	GO:0000122;GO:0001501;GO:0001822;GO:0001890;GO:0004860;GO:0004860;GO:0004861;GO:0005515;GO:0005515;GO:0005634;GO:0005634;GO:0005634;GO:0005634;GO:0005737;GO:0007049;GO:0007050;GO:0007096;GO:0007346;GO:0007568;GO:0030099;GO:0030325;GO:0030511;GO:0033673;GO:0035264;GO:0042326;GO:0042326;GO:0042551;GO:0043010;GO:0044877;GO:0045736;GO:0045892;GO:0045893;GO:0050680;GO:0055123;GO:0060065;GO:0060669;GO:…	K09993	-	NOG245842	-	cyclin dependent kinase inhibitor 1C [Source:HGNCSymbol;Acc:HGNC:1786]	1028	P49918
ENSG00000135919	2	223975112	224039319	-	8891	SERPINE2	GO:0004867;GO:0004867;GO:0004867;GO:0004867;GO:0005102;GO:0005515;GO:0005515;GO:0005515;GO:0005539;GO:0005576;GO:0005576;GO:0005576;GO:0005576;GO:0005615;GO:0005615;GO:0005615;GO:0005829;GO:0007275;GO:0007399;GO:0007596;GO:0008201;GO:0008201;GO:0010466;GO:0010757;GO:0010951;GO:0010955;GO:0030154;GO:0030195;GO:0030334;GO:0030414;GO:0031091;GO:0031091;GO:0031232;GO:0031594;GO:0045861;GO:0048711;GO:…	K16643	-	COG4826	O	serpin family E member 2 [Source:HGNCSymbol;Acc:HGNC:8951]	5270	P07093;A0A024R451
ENSG00000137331	6	30743199	30744554	-	1356	IER3	GO:0043066;GO:0005515;GO:0005634;GO:0005634;GO:0005829;GO:0006915;GO:0009653;GO:0014066;GO:0016020;GO:0016021;GO:0043066;GO:0043066;GO:2001020;GO:2001020;	-	-	NOG46208	R	immediate early response 3 [Source:HGNCSymbol;Acc:HGNC:5392]	8870	P46695;A0A1U9X7X2
ENSG00000138166	10	110497838	110511544	+	2615	DUSP5	GO:0000165;GO:0000187;GO:0000188;GO:0004721;GO:0004725;GO:0004725;GO:0004725;GO:0005515;GO:0005634;GO:0005634;GO:0005654;GO:0005737;GO:0006470;GO:0006470;GO:0008138;GO:0008138;GO:0008138;GO:0008138;GO:0016311;GO:0016311;GO:0016787;GO:0016791;GO:0016791;GO:0017017;GO:0017017;GO:0035335;GO:0035970;	K04459	-	COG2453	T	dual specificity phosphatase 5 [Source:HGNCSymbol;Acc:HGNC:3071]	1847	Q16690
ENSG00000139318	12	89347232	89353271	-	4632	DUSP6	GO:0000165;GO:0000187;GO:0000188;GO:0000188;GO:0001933;GO:0004721;GO:0004721;GO:0004725;GO:0004725;GO:0005654;GO:0005737;GO:0005737;GO:0005737;GO:0005829;GO:0005829;GO:0005829;GO:0006470;GO:0006470;GO:0006470;GO:0008138;GO:0008138;GO:0008138;GO:0008138;GO:0010033;GO:0010942;GO:0014070;GO:0016311;GO:0016787;GO:0016791;GO:0017017;GO:0017017;GO:0017017;GO:0030154;GO:0035335;GO:0035335;GO:0042493;GO:…	K21946	-	COG2453	T	dual specificity phosphatase 6 [Source:HGNCSymbol;Acc:HGNC:3072]	1848	Q16828;A0A024RBC1
ENSG00000143507	1	221701424	221742176	-	2914	DUSP10	GO:0000188;GO:0002819;GO:0004721;GO:0004725;GO:0004725;GO:0005515;GO:0005634;GO:0005634;GO:0005654;GO:0005737;GO:0005737;GO:0005737;GO:0005794;GO:0005829;GO:0006470;GO:0006470;GO:0006470;GO:0008138;GO:0008138;GO:0008330;GO:0008432;GO:0010033;GO:0010633;GO:0010633;GO:0016311;GO:0016311;GO:0016607;GO:0016787;GO:0016791;GO:0016791;GO:0017017;GO:0030336;GO:0032496;GO:0032873;GO:0033549;GO:0033549;GO:…	K20216	-	COG2453	T	dual specificity phosphatase 10 [Source:HGNCSymbol;Acc:HGNC:3065]	11221	Q9Y6W6
ENSG00000146242	6	82363206	82370828	+	6904	TPBG	GO:0005886;GO:0005887;GO:0007155;GO:0009986;GO:0016020;GO:0016021;GO:0005737;GO:0005783;GO:0005886;GO:0005887;GO:0007155;GO:0009986;GO:0016020;GO:0016021;GO:0051965;GO:0005886;GO:0005887;GO:0007155;GO:0009986;GO:0016020;GO:0016021;	-	-	NOG301461	-	trophoblast glycoprotein [Source:HGNCSymbol;Acc:HGNC:12004]	7162	Q13641
ENSG00000148926	11	10304680	10307397	+	2718	ADM	GO:0001570;GO:0002031;GO:0003073;GO:0005102;GO:0005179;GO:0005179;GO:0005576;GO:0005576;GO:0005576;GO:0005615;GO:0005737;GO:0006171;GO:0006701;GO:0007165;GO:0007186;GO:0007189;GO:0007189;GO:0007267;GO:0007565;GO:0008015;GO:0009611;GO:0010460;GO:0010469;GO:0031623;GO:0031700;GO:0035809;GO:0045906;GO:0097647;GO:1990410;GO:0005179;GO:0005576;GO:0010469;GO:0005179;GO:0005576;GO:0010469;GO:0005179;GO:…	K12333	-	NOG46109	-	adrenomedullin [Source:HGNC Symbol;Acc:HGNC:259]	133	P35318
ENSG00000153162	6	7726797	7881422	+	2780	BMP6	GO:0000122;GO:0000122;GO:0001501;GO:0001503;GO:0001503;GO:0001649;GO:0001649;GO:0001654;GO:0001822;GO:0001938;GO:0001958;GO:0003323;GO:0005125;GO:0005125;GO:0005160;GO:0005576;GO:0005615;GO:0005615;GO:0005615;GO:0005737;GO:0006879;GO:0006879;GO:0006954;GO:0006955;GO:0007275;GO:0008083;GO:0008083;GO:0008083;GO:0008284;GO:0010039;GO:0010469;GO:0010862;GO:0010862;GO:0010862;GO:0010862;GO:0014823;GO:…	K16620	-	NOG272883	-	bone morphogenetic protein 6 [Source:HGNCSymbol;Acc:HGNC:1073]	654	P22004;Q4VBA3;B4DUF7
ENSG00000161638	12	54395261	54419460	-	7577	ITGA5	GO:0001525;GO:0001618;GO:0001726;GO:0005154;GO:0005161;GO:0005178;GO:0005178;GO:0005515;GO:0005515;GO:0005515;GO:0005737;GO:0005783;GO:0005794;GO:0005886;GO:0005886;GO:0005911;GO:0005925;GO:0005925;GO:0007044;GO:0007155;GO:0007155;GO:0007155;GO:0007155;GO:0007157;GO:0007159;GO:0007229;GO:0007229;GO:0007565;GO:0007613;GO:0008305;GO:0008305;GO:0008305;GO:0009897;GO:0009986;GO:0009986;GO:0010811;GO:…	K06484	-	NOG26407	T	integrin subunit alpha 5 [Source:HGNCSymbol;Acc:HGNC:6141]	3678	P08648;B2R627
ENSG00000162892	1	206897443	206904139	+	1979	IL24	GO:0005125;GO:0005515;GO:0005576;GO:0005576;GO:0005615;GO:0005615;GO:0006915;GO:0006915;GO:0008284;GO:0008285;GO:0010469;GO:0019221;GO:0030336;GO:0042060;GO:0042501;GO:0042531;GO:0071222;GO:0071353;GO:0005125;GO:0005515;GO:0005576;GO:0005576;GO:0005615;GO:0006915;GO:0006915;GO:0010469;GO:0019221;GO:0005125;GO:0005515;GO:0005576;GO:0005576;GO:0005615;GO:0006915;GO:0006915;GO:0010469;GO:0019221;GO:…	K22668	-	NOG45557	-	interleukin 24 [Source:HGNC Symbol;Acc:HGNC:11346]	11009	Q13007
ENSG00000168685	5	35852695	35879603	+	6060	IL7R	GO:0000018;GO:0000902;GO:0001915;GO:0002377;GO:0003823;GO:0004896;GO:0004896;GO:0004917;GO:0005515;GO:0005576;GO:0005886;GO:0005886;GO:0006955;GO:0007165;GO:0007166;GO:0008284;GO:0008361;GO:0009897;GO:0010628;GO:0016020;GO:0016020;GO:0016021;GO:0030217;GO:0030665;GO:0033089;GO:0038111;GO:0042100;GO:0048535;GO:0048872;GO:0061024;GO:0070233;GO:1904894;GO:0004896;GO:0016020;GO:0019221;	K05072	-	NOG39823	S	interleukin 7 receptor [Source:HGNCSymbol;Acc:HGNC:6024]	3575	P16871
ENSG00000169429	4	73740506	73743716	+	2274	CXCL8	GO:0001525;GO:0002237;GO:0005125;GO:0005153;GO:0005153;GO:0005515;GO:0005515;GO:0005515;GO:0005576;GO:0005576;GO:0005576;GO:0005615;GO:0005615;GO:0005615;GO:0006935;GO:0006935;GO:0006952;GO:0006954;GO:0006954;GO:0006954;GO:0006955;GO:0006955;GO:0007050;GO:0007165;GO:0007186;GO:0007186;GO:0008009;GO:0008009;GO:0008009;GO:0008009;GO:0008285;GO:0010469;GO:0019221;GO:0019722;GO:0030155;GO:0030593;GO:…	K10030	-	NOG73311	-	C-X-C motif chemokine ligand 8 [Source:HGNCSymbol;Acc:HGNC:6025]	3576	P10145;A0A024RDA5
ENSG00000171236	19	4536409	4540474	-	3133	LRG1	GO:0001938;GO:0003674;GO:0005160;GO:0005515;GO:0005576;GO:0005576;GO:0005576;GO:0005615;GO:0005615;GO:0005615;GO:0008150;GO:0009617;GO:0016020;GO:0030511;GO:0035580;GO:0043231;GO:0043312;GO:0045766;GO:0050873;GO:0070062;GO:1904724;GO:1904813;	-	-	COG4886	S	leucine rich alpha-2-glycoprotein 1 [Source:HGNCSymbol;Acc:HGNC:29480]	116844	P02750;Q68CK4
ENSG00000171951	2	223596940	223602503	-	2719	SCG2	GO:0000165;GO:0001525;GO:0001525;GO:0001525;GO:0001937;GO:0001938;GO:0005125;GO:0005125;GO:0005515;GO:0005576;GO:0005615;GO:0005615;GO:0005788;GO:0006954;GO:0009306;GO:0010469;GO:0030141;GO:0030141;GO:0031045;GO:0035556;GO:0042056;GO:0042056;GO:0043542;GO:0043687;GO:0044267;GO:0048245;GO:0048245;GO:0050918;GO:0050930;GO:0098992;GO:2000352;GO:2001237;GO:0030141;GO:0030141;	-	-	NOG47177	-	secretogranin II [Source:HGNCSymbol;Acc:HGNC:10575]	7857	P13521
ENSG00000174500	3	112120841	112133305	-	3783	GCSAM	GO:0003779;GO:0005515;GO:0005515;GO:0005737;GO:0005886;GO:0016020;GO:0019901;GO:0045159;GO:0050855;GO:0050855;GO:2000401;GO:2000402;GO:0003779;GO:0005515;GO:0005515;GO:0005737;GO:0005886;GO:0016020;GO:0019901;GO:0045159;GO:0050855;GO:0050855;GO:2000401;GO:2000402;GO:0050855;GO:2000401;GO:0050855;GO:2000401;GO:0003779;GO:0005515;GO:0005515;GO:0005737;GO:0005886;GO:0016020;GO:0019901;GO:0045159;GO:…	-	-	NOG41792	-	germinal center associated signaling and motility[Source:HGNC Symbol;Acc:HGNC:20253]	257144	Q8N6F7
ENSG00000175463	11	67403915	67410089	+	4993	TBC1D10C	GO:0005096;GO:0005096;GO:0005515;GO:0005829;GO:0005886;GO:0005886;GO:0006886;GO:0016020;GO:0017137;GO:0031527;GO:0042147;GO:0043312;GO:0090630;GO:0101003;GO:0005096;GO:0005096;GO:0005515;GO:0005829;GO:0005886;GO:0005886;GO:0006886;GO:0016020;GO:0017137;GO:0031527;GO:0042147;GO:0043312;GO:0090630;GO:0101003;GO:0005096;GO:0005096;GO:0005515;GO:0005829;GO:0005886;GO:0005886;GO:0006886;GO:0016020;GO:…	K19944	-	COG5210	R	TBC1 domain family member 10C [Source:HGNCSymbol;Acc:HGNC:24702]	374403	Q8IV04
ENSG00000187678	5	142310427	142326455	-	6565	SPRY4	GO:0007275;GO:0009966;GO:0016020;GO:0043407;GO:0070373;GO:1990830;GO:0005515;GO:0005737;GO:0005829;GO:0005886;GO:0005925;GO:0007275;GO:0007275;GO:0009966;GO:0016020;GO:0016020;GO:0032587;GO:0040037;GO:0042995;GO:0043407;GO:0046580;GO:0070373;GO:0070373;	K17385	-	NOG68509	S	sprouty RTK signaling antagonist 4 [Source:HGNCSymbol;Acc:HGNC:15533]	81848	Q9C004
ENSG00000198947	X	31097677	33339441	-	18910	DMD	GO:0002027;GO:0002162;GO:0002162;GO:0003779;GO:0003779;GO:0003779;GO:0005200;GO:0005515;GO:0005515;GO:0005515;GO:0005737;GO:0005829;GO:0005856;GO:0005856;GO:0005886;GO:0007010;GO:0007517;GO:0008270;GO:0008307;GO:0009986;GO:0010880;GO:0010881;GO:0014809;GO:0014819;GO:0016010;GO:0016013;GO:0016020;GO:0016328;GO:0017022;GO:0017166;GO:0030018;GO:0030049;GO:0030054;GO:0030055;GO:0030175;GO:0031527;GO:…	K10366	-	COG5069	Z	dystrophin [Source:HGNC Symbol;Acc:HGNC:2928]	1756	P11532
ENSG00000232810	6	31575567	31578336	+	1676	TNF	GO:0000060;GO:0000122;GO:0000122;GO:0000122;GO:0000165;GO:0000185;GO:0000187;GO:0000977;GO:0001774;GO:0001819;GO:0001891;GO:0001891;GO:0001932;GO:0001934;GO:0001934;GO:0001937;GO:0002020;GO:0002020;GO:0002439;GO:0002740;GO:0002876;GO:0002925;GO:0005125;GO:0005125;GO:0005125;GO:0005164;GO:0005164;GO:0005164;GO:0005164;GO:0005515;GO:0005515;GO:0005576;GO:0005576;GO:0005615;GO:0005615;GO:0005615;GO:…	K03156	-	NOG40413	-	tumor necrosis factor [Source:HGNCSymbol;Acc:HGNC:11892]	7124	P01375;Q5STB3
ENSG00000077150	10	102394110	102402529	+	4484	NFKB2	GO:0000978;GO:0000981;GO:0001228;GO:0003677;GO:0003677;GO:0003700;GO:0003700;GO:0003713;GO:0005515;GO:0005515;GO:0005634;GO:0005634;GO:0005654;GO:0005737;GO:0005737;GO:0005829;GO:0005829;GO:0006355;GO:0006355;GO:0007165;GO:0032481;GO:0033257;GO:0038061;GO:0045944;GO:0048511;GO:0051092;GO:0000978;GO:0000981;GO:0001228;GO:0002268;GO:0002467;GO:0003677;GO:0003677;GO:0003700;GO:0003700;GO:0003713;GO:…	K04469	-	COG0666	R	nuclear factor kappa B subunit 2 [Source:HGNCSymbol;Acc:HGNC:7795]	4791	Q00653
ENSG00000104856	19	45001430	45038198	+	3035	RELB	GO:0000122;GO:0000977;GO:0000980;GO:0000980;GO:0000981;GO:0000981;GO:0002223;GO:0003677;GO:0003677;GO:0003677;GO:0003677;GO:0003682;GO:0003700;GO:0003700;GO:0003714;GO:0005515;GO:0005634;GO:0005634;GO:0005634;GO:0005634;GO:0005634;GO:0005654;GO:0005654;GO:0005654;GO:0005737;GO:0005737;GO:0005813;GO:0005815;GO:0005829;GO:0005829;GO:0005829;GO:0005829;GO:0005856;GO:0006355;GO:0006357;GO:0006954;GO:…	K09253	-	NOG119056	S	RELB proto-oncogene, NF-kB subunit [Source:HGNCSymbol;Acc:HGNC:9956]	5971	Q01201
ENSG00000108551	17	17494437	17496395	-	1748	RASD1	GO:0000166;GO:0003924;GO:0003924;GO:0005515;GO:0005525;GO:0005525;GO:0005634;GO:0005634;GO:0005737;GO:0005737;GO:0005886;GO:0007165;GO:0007165;GO:0007186;GO:0007263;GO:0016020;GO:0016020;GO:0016529;GO:0045892;GO:0048471;GO:0048471;GO:0000166;GO:0003924;GO:0003924;GO:0005515;GO:0005525;GO:0005525;GO:0005634;GO:0005737;GO:0005886;GO:0007165;GO:0007165;GO:0007186;GO:0016020;GO:0016020;GO:0048471;	K07843	-	COG1100	R	ras related dexamethasone induced 1 [Source:HGNCSymbol;Acc:HGNC:15828]	51655	Q9Y272
ENSG00000119138	9	70384597	70414624	-	5175	KLF9	GO:0000981;GO:0000981;GO:0003676;GO:0003677;GO:0003700;GO:0005634;GO:0005634;GO:0005654;GO:0005829;GO:0005886;GO:0006357;GO:0006357;GO:0007623;GO:0010839;GO:0046872;GO:0048511;GO:0071387;GO:0097067;	K09208	-	COG5048	R	Kruppel like factor 9 [Source:HGNCSymbol;Acc:HGNC:1123]	687	Q13886;A0A024R260
ENSG00000122877	10	62811996	62919900	-	3689	EGR2	GO:0000978;GO:0000981;GO:0000981;GO:0001102;GO:0001102;GO:0001228;GO:0003676;GO:0003677;GO:0003677;GO:0003682;GO:0003682;GO:0003700;GO:0003700;GO:0005515;GO:0005634;GO:0005634;GO:0005634;GO:0005634;GO:0005654;GO:0005737;GO:0005737;GO:0006355;GO:0006357;GO:0006366;GO:0006366;GO:0006611;GO:0006611;GO:0007420;GO:0007422;GO:0007611;GO:0007622;GO:0008045;GO:0014037;GO:0016740;GO:0016925;GO:0021569;GO:…	K12496	-	COG5048	R	early growth response 2 [Source:HGNCSymbol;Acc:HGNC:3239]	1959	P11161
ENSG00000123358	12	52022832	52059507	+	7295	NR4A1	GO:0003677;GO:0004879;GO:0005634;GO:0006355;GO:0030522;GO:0000977;GO:0000978;GO:0000981;GO:0001228;GO:0001228;GO:0001938;GO:0002042;GO:0003677;GO:0003677;GO:0003677;GO:0003677;GO:0003700;GO:0003707;GO:0004879;GO:0004879;GO:0005515;GO:0005634;GO:0005634;GO:0005634;GO:0005634;GO:0005634;GO:0005654;GO:0005667;GO:0005737;GO:0005829;GO:0006355;GO:0006367;GO:0007165;GO:0008270;GO:0030522;GO:0031965;GO:…	K04465	-	NOG245120	-	nuclear receptor subfamily 4 group A member 1[Source:HGNC Symbol;Acc:HGNC:7980]	3164	P22736;A0A024R126
ENSG00000124762	6	36676460	36687339	+	3050	CDKN1A	GO:0000079;GO:0000082;GO:0000082;GO:0000086;GO:0000307;GO:0004693;GO:0004860;GO:0004860;GO:0004861;GO:0004861;GO:0004861;GO:0004861;GO:0005515;GO:0005515;GO:0005634;GO:0005634;GO:0005634;GO:0005654;GO:0005654;GO:0005654;GO:0005730;GO:0005737;GO:0005829;GO:0006357;GO:0006367;GO:0006974;GO:0006977;GO:0006977;GO:0007049;GO:0007050;GO:0007050;GO:0007050;GO:0007265;GO:0007346;GO:0007507;GO:0008285;GO:…	K06625	-	NOG290902	-	cyclin dependent kinase inhibitor 1A [Source:HGNCSymbol;Acc:HGNC:1784]	1026	P38936;A0A024RCX5
ENSG00000128016	19	39406813	39409412	+	2010	ZFP36	GO:0000122;GO:0000165;GO:0000288;GO:0000289;GO:0003729;GO:0005515;GO:0005634;GO:0005737;GO:0005829;GO:0006357;GO:0009611;GO:0017091;GO:0030014;GO:0035278;GO:0035556;GO:0035925;GO:0038066;GO:0043488;GO:0044344;GO:0045085;GO:0045600;GO:0045638;GO:0046872;GO:0046872;GO:0050728;GO:0050779;GO:0060213;GO:0061014;GO:0061158;GO:0070063;GO:0071222;GO:0071356;GO:0071889;GO:1900153;GO:1904246;GO:1990904;GO:…	K15308	-	COG5063	R	ZFP36 ring finger protein [Source:HGNCSymbol;Acc:HGNC:12862]	7538	P26651;M0QY76
ENSG00000134107	3	4979116	4985323	+	3837	BHLHE40	GO:0000122;GO:0000977;GO:0000978;GO:0000980;GO:0000981;GO:0000981;GO:0000981;GO:0001102;GO:0001102;GO:0001227;GO:0001227;GO:0001227;GO:0001756;GO:0003677;GO:0003677;GO:0003677;GO:0003700;GO:0003714;GO:0003714;GO:0003714;GO:0005515;GO:0005515;GO:0005634;GO:0005634;GO:0005634;GO:0005634;GO:0005737;GO:0006355;GO:0006355;GO:0007219;GO:0007623;GO:0008134;GO:0009416;GO:0016604;GO:0019904;GO:0030154;GO:…	K03729	-	NOG281955	-	basic helix-loop-helix family member e40[Source:HGNC Symbol;Acc:HGNC:1046]	8553	O14503;Q6IB83
ENSG00000144655	3	39141855	39154562	-	3214	CSRNP1	GO:0000981;GO:0001228;GO:0003674;GO:0003677;GO:0003700;GO:0003700;GO:0005515;GO:0005634;GO:0005634;GO:0006355;GO:0006915;GO:0009791;GO:0043565;GO:0045944;GO:0045944;GO:0048008;GO:0048705;GO:0060021;GO:0060325;GO:0000981;GO:0003674;GO:0003677;GO:0003700;GO:0005515;GO:0005634;GO:0006915;GO:0045944;	K17494	-	NOG150539	S	cysteine and serine rich nuclear protein 1[Source:HGNC Symbol;Acc:HGNC:14300]	64651	Q96S65;A0A024R2N7
ENSG00000146232	6	44258166	44265788	-	2581	NFKBIE	GO:0001650;GO:0005634;GO:0005829;GO:0001650;GO:0005515;GO:0005634;GO:0005737;GO:0005737;GO:0005794;GO:0005829;GO:0005829;GO:0042942;GO:0042994;GO:0048471;	K05872	-	COG0666	R	NFKB inhibitor epsilon [Source:HGNCSymbol;Acc:HGNC:7799]	4794	O00221;Q96F31;A0A024RD24
ENSG00000146592	7	28299321	28825894	+	11674	CREB5	GO:0000981;GO:0003676;GO:0003677;GO:0003700;GO:0003700;GO:0005515;GO:0005634;GO:0006355;GO:0006357;GO:0006366;GO:0045893;GO:0046872;GO:0070062;GO:0003676;GO:0000981;GO:0003676;GO:0003677;GO:0003700;GO:0003700;GO:0005515;GO:0005634;GO:0006355;GO:0006357;GO:0006366;GO:0045893;GO:0046872;GO:0070062;GO:0000981;GO:0003676;GO:0003677;GO:0003700;GO:0003700;GO:0005515;GO:0005634;GO:0006355;GO:0006357;GO:…	K09047	-	NOG286140	-	cAMP responsive element binding protein 5[Source:HGNC Symbol;Acc:HGNC:16844]	9586	Q02930
ENSG00000160888	19	13150415	13154908	+	3072	IER2	GO:0000977;GO:0001228;GO:0003677;GO:0005634;GO:0005654;GO:0005737;GO:0030182;GO:0045944;GO:0048870;GO:0071774;GO:0000977;GO:0001228;GO:0003677;GO:0005634;GO:0005654;GO:0005737;GO:0030182;GO:0045944;GO:0048870;GO:0071774;GO:0000977;GO:0001228;GO:0003677;GO:0005634;GO:0005654;GO:0005737;GO:0005737;GO:0030182;GO:0045944;GO:0048870;GO:0071774;	-	-	NOG40154	-	immediate early response 2 [Source:HGNCSymbol;Acc:HGNC:28871]	9592	Q9BTL4;A0A024R7H1
ENSG00000167800	11	67631303	67639560	-	1548	TBX10	GO:0000981;GO:0003677;GO:0003700;GO:0005634;GO:0005634;GO:0006355;GO:0006357;GO:0009653;	K10181	-	NOG272513	-	T-box 10 [Source:HGNC Symbol;Acc:HGNC:11593]	347853	O75333
ENSG00000170345	14	75278774	75282230	+	3238	FOS	GO:0000978;GO:0000978;GO:0000979;GO:0000981;GO:0001102;GO:0001228;GO:0001661;GO:0003677;GO:0003677;GO:0003677;GO:0003677;GO:0003682;GO:0003690;GO:0003700;GO:0003700;GO:0003700;GO:0003700;GO:0003700;GO:0005515;GO:0005634;GO:0005634;GO:0005634;GO:0005634;GO:0005634;GO:0005634;GO:0005634;GO:0005654;GO:0005654;GO:0005667;GO:0005667;GO:0005737;GO:0005783;GO:0005829;GO:0006306;GO:0006355;GO:0006355;GO:…	K04379	-	NOG258795	-	Fos proto-oncogene, AP-1 transcription factorsubunit [Source:HGNC Symbol;Acc:HGNC:3796]	2353	P01100;Q6FG41
ENSG00000170485	2	100820152	100996829	+	12491	NPAS2	GO:0000980;GO:0000981;GO:0003677;GO:0003677;GO:0003700;GO:0003700;GO:0005515;GO:0005634;GO:0005634;GO:0005654;GO:0005654;GO:0005667;GO:0005667;GO:0005737;GO:0005829;GO:0005829;GO:0006355;GO:0006974;GO:0007417;GO:0007623;GO:0019216;GO:0032922;GO:0045739;GO:0045893;GO:0045944;GO:0046872;GO:0046983;GO:0048511;GO:0051775;GO:0051879;GO:0060548;GO:2001020;GO:0003700;GO:0005634;GO:0005634;GO:0005667;GO:…	K09026	-	NOG300360	-	neuronal PAS domain protein 2 [Source:HGNCSymbol;Acc:HGNC:7895]	4862	Q99743;A2I2P5
ENSG00000171223	19	12791496	12793315	+	1820	JUNB	GO:0000122;GO:0000785;GO:0000790;GO:0000977;GO:0000978;GO:0000978;GO:0000981;GO:0000981;GO:0001228;GO:0001570;GO:0001649;GO:0001701;GO:0001829;GO:0003677;GO:0003677;GO:0003677;GO:0003677;GO:0003700;GO:0003713;GO:0003713;GO:0003714;GO:0005515;GO:0005634;GO:0005654;GO:0005654;GO:0005654;GO:0005667;GO:0006355;GO:0006355;GO:0006357;GO:0006357;GO:0008134;GO:0009314;GO:0009612;GO:0009987;GO:0010033;GO:…	K09028	-	NOG283376	-	JunB proto-oncogene, AP-1 transcription factorsubunit [Source:HGNC Symbol;Acc:HGNC:6205]	3726	P17275;Q5U079
ENSG00000175592	11	65892049	65900573	-	1887	FOSL1	GO:0000978;GO:0000978;GO:0000981;GO:0003677;GO:0003677;GO:0003700;GO:0003700;GO:0005515;GO:0005634;GO:0005634;GO:0005634;GO:0005634;GO:0005654;GO:0006355;GO:0006357;GO:0006357;GO:0006366;GO:0006935;GO:0006968;GO:0008284;GO:0009615;GO:0061614;GO:2000144;GO:0000977;GO:0000978;GO:0000978;GO:0000978;GO:0000981;GO:0001228;GO:0001701;GO:0003677;GO:0003677;GO:0003677;GO:0003700;GO:0003700;GO:0005515;GO:…	K04502	-	NOG252534	-	FOS like 1, AP-1 transcription factor subunit[Source:HGNC Symbol;Acc:HGNC:13718]	8061	P15407;A0A0S2Z595
ENSG00000175832	17	43527844	43579620	-	3607	ETV4	GO:0000978;GO:0000981;GO:0000981;GO:0001228;GO:0003677;GO:0003700;GO:0005515;GO:0005634;GO:0005634;GO:0005634;GO:0005654;GO:0005730;GO:0006355;GO:0006357;GO:0030154;GO:0043565;GO:0045944;GO:0000978;GO:0000981;GO:0000981;GO:0001228;GO:0003677;GO:0003700;GO:0005515;GO:0005634;GO:0005634;GO:0005634;GO:0005654;GO:0005730;GO:0006355;GO:0006357;GO:0030154;GO:0043565;GO:0045944;GO:0000978;GO:0000981;GO:…	K15592	-	NOG258471	-	ETS variant 4 [Source:HGNC Symbol;Acc:HGNC:3493]	2118	P43268
ENSG00000179388	8	22687659	22693302	-	4855	EGR3	GO:0000977;GO:0000981;GO:0000981;GO:0001938;GO:0002042;GO:0003676;GO:0003677;GO:0003700;GO:0005634;GO:0005634;GO:0006357;GO:0007274;GO:0007422;GO:0007517;GO:0007623;GO:0033089;GO:0035767;GO:0035924;GO:0043066;GO:0043565;GO:0044344;GO:0045586;GO:0045944;GO:0045944;GO:0046872;GO:0071363;GO:0000977;GO:0000981;GO:0000981;GO:0001938;GO:0002042;GO:0003676;GO:0003677;GO:0003700;GO:0005634;GO:0005634;GO:…	K12497	-	COG5048	R	early growth response 3 [Source:HGNCSymbol;Acc:HGNC:3240]	1960	Q06889
ENSG00000182759	8	143419182	143430406	-	2504	MAFA	GO:0000978;GO:0000978;GO:0000981;GO:0001228;GO:0001228;GO:0003677;GO:0003677;GO:0003677;GO:0003700;GO:0003700;GO:0003700;GO:0003700;GO:0005634;GO:0005634;GO:0005634;GO:0005634;GO:0005634;GO:0006355;GO:0006355;GO:0007263;GO:0009749;GO:0030073;GO:0042803;GO:0043565;GO:0045893;GO:0045944;GO:0046982;	K07595	-	NOG241084	-	MAF bZIP transcription factor A [Source:HGNCSymbol;Acc:HGNC:23145]	389692	Q8NHW3
ENSG00000198879	10	7158624	7411486	-	9953	SFMBT2	GO:0003714;GO:0005515;GO:0005634;GO:0005634;GO:0006355;GO:0010629;GO:0016235;GO:0016607;GO:0042393;GO:0042393;GO:0043231;GO:1903507;GO:0003714;GO:0005515;GO:0005634;GO:0005634;GO:0006355;GO:0010629;GO:0016235;GO:0016607;GO:0042393;GO:0042393;GO:0043231;GO:1903507;GO:0005634;GO:0006355;GO:0005634;GO:0006355;	-	-	NOG316861	-	Scm like with four mbt domains 2 [Source:HGNCSymbol;Acc:HGNC:20256]	57713	Q5VUG0
ENSG00000244405	3	186046308	186110318	-	5802	ETV5	GO:0000977;GO:0000981;GO:0000981;GO:0001228;GO:0003677;GO:0003677;GO:0003700;GO:0003700;GO:0003700;GO:0005515;GO:0005634;GO:0005634;GO:0005634;GO:0005654;GO:0005886;GO:0006355;GO:0006357;GO:0007274;GO:0007626;GO:0030154;GO:0034599;GO:0043565;GO:0044212;GO:0045666;GO:0045893;GO:0045944;GO:0048133;GO:0050807;GO:0060252;GO:0060762;GO:0071340;GO:0000977;GO:0000981;GO:0000981;GO:0001228;GO:0003677;GO:…	K15593	-	NOG258471	-	ETS variant 5 [Source:HGNC Symbol;Acc:HGNC:3494]	2119	P41161
ENSG00000077238	16	27313668	27364778	+	5894	IL4R	GO:0002532;GO:0004896;GO:0016021;GO:0019221;GO:0002376;GO:0002532;GO:0002639;GO:0004896;GO:0004913;GO:0005515;GO:0005576;GO:0005615;GO:0005886;GO:0005886;GO:0005887;GO:0006955;GO:0007165;GO:0016020;GO:0016020;GO:0016021;GO:0016021;GO:0016064;GO:0019221;GO:0030728;GO:0035771;GO:0042127;GO:0042832;GO:0043032;GO:0043235;GO:0043306;GO:0043627;GO:0045626;GO:0045630;GO:0090197;GO:0120162;GO:0120162;GO:…	K05071	-	NOG46569	-	interleukin 4 receptor [Source:HGNCSymbol;Acc:HGNC:6015]	3566	P24394
ENSG00000125148	16	56608199	56609497	+	1299	MT2A	GO:0005515;GO:0005634;GO:0005634;GO:0005737;GO:0005737;GO:0005829;GO:0006878;GO:0006882;GO:0008144;GO:0008270;GO:0010038;GO:0010273;GO:0035690;GO:0036016;GO:0036018;GO:0045926;GO:0046872;GO:0046872;GO:0046872;GO:0048471;GO:0060333;GO:0071276;GO:0071280;GO:0071294;GO:0071294;GO:0046872;GO:0046872;	K14739	-	-	-	metallothionein 2A [Source:HGNCSymbol;Acc:HGNC:7406]	4502	P02795
ENSG00000136286	7	44962662	44979098	-	8727	MYO1G	GO:0000166;GO:0001891;GO:0001891;GO:0002250;GO:0002376;GO:0002456;GO:0002456;GO:0003774;GO:0003779;GO:0005516;GO:0005524;GO:0005524;GO:0005546;GO:0005546;GO:0005547;GO:0005547;GO:0005886;GO:0005886;GO:0005886;GO:0005902;GO:0006887;GO:0006909;GO:0008289;GO:0016020;GO:0016459;GO:0016459;GO:0030027;GO:0030175;GO:0031256;GO:0031589;GO:0038096;GO:0038096;GO:0042995;GO:0043325;GO:0043325;GO:0070062;GO:…	K10356	-	COG5022	Z	myosin IG [Source:HGNC Symbol;Acc:HGNC:13880]	64005	B0I1T2
ENSG00000163701	3	9902612	9916402	+	4676	IL17RE	GO:0016020;GO:0016021;GO:0019221;GO:0030368;GO:0005515;GO:0005576;GO:0005737;GO:0005886;GO:0005886;GO:0006954;GO:0016020;GO:0016021;GO:0030368;GO:0030368;GO:0097400;GO:0019221;GO:0030368;GO:0005515;GO:0005576;GO:0005737;GO:0005886;GO:0005886;GO:0006954;GO:0016020;GO:0016021;GO:0030368;GO:0030368;GO:0097400;GO:0019221;GO:0030368;	K05168	-	NOG47803	-	interleukin 17 receptor E [Source:HGNCSymbol;Acc:HGNC:18439]	132014	Q8NFR9
ENSG00000164949	8	94249253	94262350	-	2648	GEM	GO:0000166;GO:0000278;GO:0000287;GO:0003924;GO:0003924;GO:0003924;GO:0005246;GO:0005515;GO:0005515;GO:0005516;GO:0005525;GO:0005525;GO:0005525;GO:0005525;GO:0005525;GO:0005886;GO:0005886;GO:0006955;GO:0007165;GO:0007165;GO:0007166;GO:0009898;GO:0016020;GO:0016020;GO:0019003;GO:0030496;GO:0051233;GO:0051276;GO:0051310;GO:0072686;GO:1901842;GO:1901842;GO:0000166;GO:0000278;GO:0000287;GO:0003924;GO:…	K07846	-	COG1100	R	GTP binding protein overexpressed in skeletalmuscle [Source:HGNC Symbol;Acc:HGNC:4234]	2669	P55040;A0A024R9F5
ENSG00000183813	3	32951574	32956349	+	3095	CCR4	GO:0001764;GO:0002507;GO:0004930;GO:0004930;GO:0004950;GO:0004950;GO:0005515;GO:0005886;GO:0005886;GO:0005886;GO:0005887;GO:0006935;GO:0006935;GO:0006935;GO:0006935;GO:0006954;GO:0006954;GO:0006954;GO:0006955;GO:0006955;GO:0006955;GO:0007165;GO:0007186;GO:0007186;GO:0007186;GO:0007204;GO:0007204;GO:0009314;GO:0009617;GO:0009897;GO:0009897;GO:0016020;GO:0016021;GO:0016021;GO:0016493;GO:0016493;GO:…	K04179	-	NOG148353	S	C-C motif chemokine receptor 4 [Source:HGNCSymbol;Acc:HGNC:1605]	1233	P51679;A0N0Q1
ENSG00000069020	5	66596361	67169595	+	14675	MAST4	GO:0000166;GO:0000287;GO:0004672;GO:0004674;GO:0004674;GO:0004674;GO:0005524;GO:0005524;GO:0005737;GO:0006468;GO:0007010;GO:0016301;GO:0016310;GO:0016740;GO:0018105;GO:0035556;GO:0046872;GO:0000166;GO:0000287;GO:0004672;GO:0004674;GO:0004674;GO:0004674;GO:0005524;GO:0005524;GO:0005737;GO:0006468;GO:0007010;GO:0016301;GO:0016310;GO:0016740;GO:0018105;GO:0035556;GO:0046872;GO:0004674;GO:0006468;GO:…	K08789	EC:2.7.11.1	COG0515	T	microtubule associated serine/threonine kinasefamily member 4 [Source:HGNC Symbol;Acc:HGNC:19037]	375449	O15021
ENSG00000079337	12	47734367	47771040	-	12078	RAPGEF3	GO:0000166;GO:0001525;GO:0005085;GO:0005085;GO:0005085;GO:0005085;GO:0005085;GO:0005515;GO:0005886;GO:0005886;GO:0005902;GO:0007165;GO:0007264;GO:0008283;GO:0012505;GO:0016020;GO:0016020;GO:0017034;GO:0019904;GO:0019933;GO:0030027;GO:0030175;GO:0030552;GO:0030864;GO:0032486;GO:0033138;GO:0034242;GO:0035556;GO:0043547;GO:0045766;GO:0046827;GO:0050796;GO:0051496;GO:0060143;GO:0061028;GO:0070062;GO:…	K08014	-	COG0664	T	Rap guanine nucleotide exchange factor 3[Source:HGNC Symbol;Acc:HGNC:16629]	10411	O95398;Q99777
ENSG00000112149	6	14117256	14136918	+	2515	CD83	GO:0016020;GO:0016021;GO:0005515;GO:0005886;GO:0005887;GO:0006952;GO:0006959;GO:0007165;GO:0009897;GO:0014070;GO:0016020;GO:0016021;GO:0032713;GO:0032733;GO:0032743;GO:0043372;	K06510	-	NOG44884	-	CD83 molecule [Source:HGNC Symbol;Acc:HGNC:1703]	9308	Q01151
ENSG00000116983	1	39678648	39691689	-	4962	HPCAL4	GO:0005246;GO:0005246;GO:0005509;GO:0005509;GO:0005515;GO:0005622;GO:0007165;GO:0007417;GO:0008022;GO:0019904;GO:0046872;GO:0005246;GO:0005509;GO:0007165;GO:0005246;GO:0005509;GO:0005509;GO:0005515;GO:0005622;GO:0007165;GO:0007417;GO:0046872;	-	-	COG5126	DTZ	hippocalcin like 4 [Source:HGNCSymbol;Acc:HGNC:18212]	51440	Q9UM19
ENSG00000122862	10	69088106	69104811	+	1220	SRGN	GO:0002576;GO:0005515;GO:0005515;GO:0005576;GO:0005576;GO:0005615;GO:0005794;GO:0006915;GO:0008626;GO:0016485;GO:0016485;GO:0030502;GO:0030502;GO:0031093;GO:0031214;GO:0033364;GO:0033364;GO:0033371;GO:0033371;GO:0033373;GO:0033373;GO:0033382;GO:0033382;GO:0042629;GO:0042629;GO:0050710;GO:0050710;	K06849	-	NOG44969	O	serglycin [Source:HGNC Symbol;Acc:HGNC:9361]	5552	P10124
ENSG00000128564	7	101162509	101165593	-	2704	VGF	GO:0001541;GO:0002021;GO:0003674;GO:0005184;GO:0005184;GO:0005576;GO:0005615;GO:0005615;GO:0005788;GO:0005794;GO:0006091;GO:0008083;GO:0009409;GO:0010469;GO:0019953;GO:0030073;GO:0030133;GO:0031410;GO:0032868;GO:0042593;GO:0042742;GO:0043231;GO:0043687;GO:0044267;GO:0051591;GO:0005184;GO:0010469;GO:0003674;GO:0005184;GO:0005576;GO:0005615;GO:0005615;GO:0005788;GO:0005794;GO:0008083;GO:0010469;GO:…	-	-	NOG75774	S	VGF nerve growth factor inducible [Source:HGNCSymbol;Acc:HGNC:12684]	7425	O15240
ENSG00000181773	1	27392644	27395814	+	2115	GPR3	GO:0004930;GO:0004930;GO:0004930;GO:0005515;GO:0005886;GO:0005887;GO:0007165;GO:0007186;GO:0007186;GO:0007189;GO:0016020;GO:0016021;GO:0016021;GO:0040020;GO:0120162;GO:0120162;	K04311	-	NOG320944	-	G protein-coupled receptor 3 [Source:HGNCSymbol;Acc:HGNC:4484]	2827	P46089;F1DAM5
ENSG00000187800	1	156893698	156916434	+	5530	PEAR1	GO:0001891;GO:0005886;GO:0005886;GO:0014065;GO:0016020;GO:0016021;GO:0038023;GO:0043491;GO:0043654;GO:0045746;GO:0070527;GO:0005886;GO:0016020;GO:0016021;GO:0045746;	-	-	NOG320509	-	platelet endothelial aggregation receptor 1[Source:HGNC Symbol;Acc:HGNC:33631]	375033	Q5VY43
ENSG00000196639	3	11137093	11263557	+	5546	HRH1	GO:0004930;GO:0004930;GO:0004930;GO:0004930;GO:0004969;GO:0004969;GO:0004969;GO:0004969;GO:0004993;GO:0005829;GO:0005886;GO:0005886;GO:0005886;GO:0005887;GO:0005887;GO:0005887;GO:0005887;GO:0006954;GO:0007165;GO:0007186;GO:0007186;GO:0007186;GO:0007186;GO:0007187;GO:0007200;GO:0007268;GO:0016020;GO:0016021;GO:0016021;GO:0030425;GO:0030594;GO:0032962;GO:0043114;GO:0045907;GO:0048016;GO:0048245;GO:…	K04149	-	NOG318797	-	histamine receptor H1 [Source:HGNCSymbol;Acc:HGNC:5182]	3269	P35367
ENSG00000204291	9	98943179	99070792	+	6653	COL15A1	GO:0001525;GO:0005198;GO:0005201;GO:0005576;GO:0005576;GO:0005581;GO:0005582;GO:0005604;GO:0005604;GO:0005615;GO:0005615;GO:0005788;GO:0007155;GO:0007155;GO:0007165;GO:0007275;GO:0016021;GO:0030020;GO:0030154;GO:0030198;GO:0030574;GO:0031012;GO:0062023;GO:0070062;GO:0005198;GO:0005581;GO:0005604;GO:0007155;	K08135	-	NOG12793	-	collagen type XV alpha 1 chain [Source:HGNCSymbol;Acc:HGNC:2192]	1306	P39059;B3KTP7
ENSG00000003436	2	187464230	187565760	-	11714	TFPI	GO:0004866;GO:0004867;GO:0004867;GO:0004867;GO:0005576;GO:0005576;GO:0005576;GO:0005615;GO:0005615;GO:0005783;GO:0005886;GO:0005901;GO:0007596;GO:0007596;GO:0007598;GO:0007599;GO:0009986;GO:0010466;GO:0010466;GO:0010951;GO:0016020;GO:0030195;GO:0030414;GO:0030414;GO:0031090;GO:0031225;GO:0043231;GO:0071383;GO:0004866;GO:0004867;GO:0004867;GO:0004867;GO:0005576;GO:0005576;GO:0005576;GO:0005615;GO:…	K03909	-	NOG86404	S	tissue factor pathway inhibitor [Source:HGNCSymbol;Acc:HGNC:11760]	7035	P10646
ENSG00000095303	9	122370530	122395703	+	5791	PTGS1	GO:0001516;GO:0004601;GO:0004666;GO:0006954;GO:0006979;GO:0008217;GO:0019371;GO:0020037;GO:0055114;GO:0098869;GO:0001516;GO:0001516;GO:0004601;GO:0004601;GO:0004601;GO:0004666;GO:0004666;GO:0004666;GO:0004666;GO:0005737;GO:0005737;GO:0005783;GO:0005789;GO:0005789;GO:0005794;GO:0006629;GO:0006631;GO:0006633;GO:0006693;GO:0006805;GO:0006954;GO:0006979;GO:0008217;GO:0008217;GO:0016020;GO:0016491;GO:…	K00509	EC:1.14.99.1	NOG39991	S	prostaglandin-endoperoxide synthase 1 [Source:HGNCSymbol;Acc:HGNC:9604]	5742	P23219
ENSG00000117226	1	89006666	89022894	-	4297	GBP3	GO:0000139;GO:0000166;GO:0002376;GO:0003924;GO:0005515;GO:0005515;GO:0005525;GO:0005525;GO:0005737;GO:0005794;GO:0005829;GO:0016020;GO:0016787;GO:0042803;GO:0048471;GO:0051607;GO:0071347;GO:0071356;GO:0000166;GO:0003924;GO:0005525;GO:0005525;GO:0016020;GO:0000166;GO:0003924;GO:0005525;GO:0005525;GO:0016020;GO:0000166;GO:0003924;GO:0005525;GO:0005525;GO:0016020;GO:0003924;GO:0005525;GO:0003924;GO:…	K20899	-	NOG288755	-	guanylate binding protein 3 [Source:HGNCSymbol;Acc:HGNC:4184]	2635	Q9H0R5
ENSG00000173110	1	161524540	161526910	+	2371	HSPA6	GO:0000166;GO:0005515;GO:0005524;GO:0005524;GO:0005576;GO:0005634;GO:0005737;GO:0005737;GO:0005814;GO:0005829;GO:0005829;GO:0006986;GO:0006986;GO:0008180;GO:0008180;GO:0016887;GO:0019899;GO:0031072;GO:0031072;GO:0032991;GO:0034605;GO:0034605;GO:0034620;GO:0034774;GO:0042026;GO:0042026;GO:0042623;GO:0042623;GO:0043312;GO:0044183;GO:0051082;GO:0051082;GO:0051085;GO:0051787;GO:0070062;GO:0072562;GO:…	K03283	-	COG0443	O	heat shock protein family A (Hsp70) member 6[Source:HGNC Symbol;Acc:HGNC:5239]	3310	P17066;B3KSM6;A0A384NKX5
ENSG00000198771	1	167630093	167706249	+	5718	RCSD1	GO:0003009;GO:0005884;GO:0051015;GO:0071474;	K18615	-	NOG78730	K	RCSD domain containing 1 [Source:HGNCSymbol;Acc:HGNC:28310]	92241	Q6JBY9
ENSG00000137868	15	74179466	74212267	-	7690	STRA6	GO:0001523;GO:0001568;GO:0001822;GO:0003184;GO:0003281;GO:0005886;GO:0005886;GO:0005886;GO:0005887;GO:0007507;GO:0007612;GO:0007631;GO:0016020;GO:0016021;GO:0016918;GO:0019841;GO:0030324;GO:0030325;GO:0030540;GO:0032991;GO:0034632;GO:0034632;GO:0034633;GO:0038023;GO:0042297;GO:0043010;GO:0043583;GO:0043585;GO:0048286;GO:0048520;GO:0048546;GO:0048566;GO:0048589;GO:0048745;GO:0048844;GO:0050890;GO:…	K23088	-	NOG47654	-	stimulated by retinoic acid 6 [Source:HGNCSymbol;Acc:HGNC:30650]	64220	Q9BX79;B3KPB8
ENSG00000175294	11	66016752	66026517	-	2687	CATSPER1	GO:0005216;GO:0005227;GO:0005244;GO:0005245;GO:0005262;GO:0005515;GO:0005886;GO:0005886;GO:0005929;GO:0006811;GO:0006811;GO:0006816;GO:0007275;GO:0007283;GO:0007283;GO:0016020;GO:0016020;GO:0016021;GO:0030154;GO:0030317;GO:0030317;GO:0031514;GO:0034765;GO:0035036;GO:0036128;GO:0036128;GO:0036128;GO:0042995;GO:0055085;GO:0060296;GO:0070588;	K16889	-	NOG270165	-	cation channel sperm associated 1 [Source:HGNCSymbol;Acc:HGNC:17116]	117144	Q8NEC5
ENSG00000059804	12	7919230	7936275	-	6159	SLC2A3	GO:0005215;GO:0005355;GO:0005355;GO:0005355;GO:0005536;GO:0005886;GO:0005886;GO:0005887;GO:0005975;GO:0008643;GO:0016020;GO:0016020;GO:0016021;GO:0016021;GO:0019852;GO:0022857;GO:0030667;GO:0033300;GO:0035579;GO:0042995;GO:0043204;GO:0043312;GO:0055056;GO:0055085;GO:0070062;GO:0070821;GO:0070837;GO:0101003;GO:1904659;GO:1904659;GO:1904659;GO:1904659;GO:0005215;GO:0016020;GO:0016021;GO:0016021;GO:…	K08142	-	COG0477	G	solute carrier family 2 member 3 [Source:HGNCSymbol;Acc:HGNC:11007]	6515	P11169
ENSG00000116690	1	186296279	186314562	+	5044	PRG4	GO:0005044;GO:0006898;GO:0006955;GO:0030247;GO:0005044;GO:0006898;GO:0006955;GO:0030247;GO:0005044;GO:0005576;GO:0006898;GO:0006955;GO:0008283;GO:0030021;GO:0030247;GO:0062023;GO:0005044;GO:0005576;GO:0006898;GO:0006955;GO:0008283;GO:0030021;GO:0030247;GO:0062023;GO:0005044;GO:0005576;GO:0006898;GO:0006955;GO:0008283;GO:0030021;GO:0030247;GO:0062023;GO:0005044;GO:0005576;GO:0006898;GO:0006955;GO:…	-	-	NOG12793	-	proteoglycan 4 [Source:HGNC Symbol;Acc:HGNC:9364]	10216	Q92954
ENSG00000140284	15	50182196	50236395	+	2802	SLC27A2	GO:0000038;GO:0000166;GO:0001561;GO:0001561;GO:0001676;GO:0001676;GO:0003824;GO:0004467;GO:0004467;GO:0004467;GO:0004467;GO:0004467;GO:0005102;GO:0005102;GO:0005324;GO:0005524;GO:0005777;GO:0005777;GO:0005778;GO:0005778;GO:0005778;GO:0005779;GO:0005779;GO:0005783;GO:0005783;GO:0005783;GO:0005788;GO:0005788;GO:0005789;GO:0005789;GO:0005829;GO:0005886;GO:0006625;GO:0006629;GO:0006631;GO:0006635;GO:…	K08746	-	COG0318	I	solute carrier family 27 member 2 [Source:HGNCSymbol;Acc:HGNC:10996]	11001	O14975
ENSG00000141524	17	78110458	78132407	-	8669	TMC6	GO:0005216;GO:0005515;GO:0005737;GO:0005783;GO:0005789;GO:0005794;GO:0005886;GO:0005887;GO:0006811;GO:0008150;GO:0008381;GO:0016020;GO:0016021;GO:0016021;GO:0031965;GO:0034220;GO:0035579;GO:0043312;GO:0055085;GO:0070062;GO:0070821;GO:0005216;GO:0005515;GO:0005737;GO:0005783;GO:0005789;GO:0005794;GO:0005886;GO:0005887;GO:0006811;GO:0008150;GO:0008381;GO:0016020;GO:0016021;GO:0016021;GO:0031965;GO:…	K21988	-	NOG78295	S	transmembrane channel like 6 [Source:HGNCSymbol;Acc:HGNC:18021]	11322	Q7Z403;A0A024R8V2
ENSG00000162894	1	206904386	206923247	-	2348	FCMR	GO:0002376;GO:0005576;GO:0006968;GO:0016020;GO:0016021;GO:0043066;GO:0002376;GO:0005576;GO:0006968;GO:0016020;GO:0016021;GO:0043066;GO:0002376;GO:0005576;GO:0006968;GO:0016020;GO:0016021;GO:0043066;	-	-	NOG42220	S	Fc fragment of IgM receptor [Source:HGNCSymbol;Acc:HGNC:14315]	9214	O60667
ENSG00000167772	19	8363289	8374373	+	2482	ANGPTL4	GO:0001525;GO:0001525;GO:0001666;GO:0001666;GO:0004857;GO:0004857;GO:0005515;GO:0005576;GO:0005576;GO:0005576;GO:0005615;GO:0005615;GO:0005615;GO:0007275;GO:0019216;GO:0030154;GO:0042802;GO:0043066;GO:0043066;GO:0043066;GO:0045766;GO:0051005;GO:0051005;GO:0051260;GO:0070328;GO:0070328;GO:0072562;GO:2000352;GO:0001525;GO:0001525;GO:0001666;GO:0004857;GO:0005515;GO:0005576;GO:0005576;GO:0005615;GO:…	K08767	-	NOG281759	-	angiopoietin like 4 [Source:HGNCSymbol;Acc:HGNC:16039]	51129	Q9BY76
ENSG00000168306	3	58505136	58537319	-	3859	ACOX2	GO:0003997;GO:0005777;GO:0005829;GO:0006631;GO:0006635;GO:0016627;GO:0043231;GO:0050660;GO:0055114;GO:0071949;GO:0003997;GO:0003997;GO:0003997;GO:0005102;GO:0005504;GO:0005777;GO:0005777;GO:0005777;GO:0005782;GO:0005829;GO:0005829;GO:0006625;GO:0006629;GO:0006631;GO:0006631;GO:0006635;GO:0006699;GO:0010942;GO:0016402;GO:0016491;GO:0016627;GO:0033540;GO:0033540;GO:0033540;GO:0033791;GO:0033791;GO:…	K10214	EC:1.17.99.3	COG1960	I	acyl-CoA oxidase 2 [Source:HGNCSymbol;Acc:HGNC:120]	8309	Q99424

## Sheet: 0h_vs_12h.DESeq.Down
ID	Chromosome	Start Site	End Site	Direction	Length	Name	GO	KEGG	EC	eggNOG Class	eggNOG	Description	NCBI	UniProtID
ENSG00000108984	69414698	69414698	69414698	69414698	69414698	69414698	69414698	69414698	69414698	69414698	69414698	69414698	69414698	69414698
ENSG00000113721	150113837	150113837	150113837	150113837	150113837	150113837	150113837	150113837	150113837	150113837	150113837	150113837	150113837	150113837
ENSG00000115705	1374066	1374066	1374066	1374066	1374066	1374066	1374066	1374066	1374066	1374066	1374066	1374066	1374066	1374066
ENSG00000120899	27311482	27311482	27311482	27311482	27311482	27311482	27311482	27311482	27311482	27311482	27311482	27311482	27311482	27311482
ENSG00000120915	27490779	27490779	27490779	27490779	27490779	27490779	27490779	27490779	27490779	27490779	27490779	27490779	27490779	27490779
ENSG00000131711	72107234	72107234	72107234	72107234	72107234	72107234	72107234	72107234	72107234	72107234	72107234	72107234	72107234	72107234
ENSG00000132965	30713478	30713478	30713478	30713478	30713478	30713478	30713478	30713478	30713478	30713478	30713478	30713478	30713478	30713478
ENSG00000134215	107571160	107571160	107571160	107571160	107571160	107571160	107571160	107571160	107571160	107571160	107571160	107571160	107571160	107571160
ENSG00000136378	78759203	78759203	78759203	78759203	78759203	78759203	78759203	78759203	78759203	78759203	78759203	78759203	78759203	78759203
ENSG00000164850	1082208	1082208	1082208	1082208	1082208	1082208	1082208	1082208	1082208	1082208	1082208	1082208	1082208	1082208
ENSG00000165409	80954989	80954989	80954989	80954989	80954989	80954989	80954989	80954989	80954989	80954989	80954989	80954989	80954989	80954989
ENSG00000184489	141391993	141391993	141391993	141391993	141391993	141391993	141391993	141391993	141391993	141391993	141391993	141391993	141391993	141391993
ENSG00000196159	125316399	125316399	125316399	125316399	125316399	125316399	125316399	125316399	125316399	125316399	125316399	125316399	125316399	125316399
ENSG00000198125	35606764	35606764	35606764	35606764	35606764	35606764	35606764	35606764	35606764	35606764	35606764	35606764	35606764	35606764
ENSG00000115738	8678845	8678845	8678845	8678845	8678845	8678845	8678845	8678845	8678845	8678845	8678845	8678845	8678845	8678845
ENSG00000166407	8224304	8224304	8224304	8224304	8224304	8224304	8224304	8224304	8224304	8224304	8224304	8224304	8224304	8224304
ENSG00000087495	59577509	59577509	59577509	59577509	59577509	59577509	59577509	59577509	59577509	59577509	59577509	59577509	59577509	59577509
ENSG00000146376	129576132	129576132	129576132	129576132	129576132	129576132	129576132	129576132	129576132	129576132	129576132	129576132	129576132	129576132
ENSG00000155792	119873717	119873717	119873717	119873717	119873717	119873717	119873717	119873717	119873717	119873717	119873717	119873717	119873717	119873717
ENSG00000092758	62816244	62816244	62816244	62816244	62816244	62816244	62816244	62816244	62816244	62816244	62816244	62816244	62816244	62816244
