# Supplementary material for: Discovering the Mechanisms of Oleodaphnone as a Potential HIV Latency-Reversing Agent by Transcriptome Profiling
Source: MDPI journal article supplement (doi:10.3390/ijms24087357), 2023-04-16
Supplement: s1 [file Table S2 GO enrichment-review.xlsx]

## Sheet: 0h_vs_3h
Category	GO.ID	Term	Up	Down	DEG	Total	Pvalue	FDR	Up_Gene	Down_Gene
BP	GO:0045944	positive regulation of transcription by RNA polymerase II	77	35	112	1206	6.48958e-16	6.46722e-13	ENSG00000069399(BCL3),ENSG00000074181(NOTCH3),ENSG00000075426(FOSL2),ENSG00000077150(NFKB2),ENSG00000095752(IL11),ENSG00000095794(CREM),ENSG00000095951(HIVEP1),ENSG00000100625(SIX4),ENSG00000100906(NFKBIA),ENSG00000101096(NFATC2),ENSG00000101928(MOSPD1),ENSG00000102554(KLF5),ENSG00000104064(GABPB1),ENSG00000104885(DOT1L),ENSG00000105835(NAMPT),ENSG00000107201(DDX58),ENSG00000108840(HDAC5),ENSG000…	ENSG00000005102(MEOX1),ENSG00000064195(DLX3),ENSG00000078401(EDN1),ENSG00000105516(DBP),ENSG00000105672(ETV2),ENSG00000111087(GLI1),ENSG00000116128(BCL9),ENSG00000120075(HOXB5),ENSG00000120093(HOXB3),ENSG00000124496(TRERF1),ENSG00000125378(BMP4),ENSG00000126351(THRA),ENSG00000138336(TET1),ENSG00000139445(FOXN4),ENSG00000143178(TBX19),ENSG00000160685(ZBTB7B),ENSG00000163884(KLF15),ENSG00000164362(…
BP	GO:0045893	positive regulation of transcription, DNA-templated	87	50	137	1630	8.44403e-16	6.63446e-13	ENSG00000006459(KDM7A),ENSG00000034152(MAP2K3),ENSG00000069399(BCL3),ENSG00000074181(NOTCH3),ENSG00000075426(FOSL2),ENSG00000077150(NFKB2),ENSG00000095752(IL11),ENSG00000095794(CREM),ENSG00000095951(HIVEP1),ENSG00000100003(SEC14L2),ENSG00000100625(SIX4),ENSG00000100906(NFKBIA),ENSG00000101096(NFATC2),ENSG00000101928(MOSPD1),ENSG00000102554(KLF5),ENSG00000104064(GABPB1),ENSG00000104885(DOT1L),ENSG…	ENSG00000005102(MEOX1),ENSG00000064195(DLX3),ENSG00000078401(EDN1),ENSG00000085741(WNT11),ENSG00000092529(CAPN3),ENSG00000105516(DBP),ENSG00000105672(ETV2),ENSG00000111087(GLI1),ENSG00000115596(WNT6),ENSG00000115738(ID2),ENSG00000116128(BCL9),ENSG00000120075(HOXB5),ENSG00000120093(HOXB3),ENSG00000123405(NFE2),ENSG00000124496(TRERF1),ENSG00000125378(BMP4),ENSG00000126351(THRA),ENSG00000138336(TET1…
BP	GO:1903508	positive regulation of nucleic acid-templated transcription	87	50	137	1630	8.44403e-16	6.63446e-13	ENSG00000006459(KDM7A),ENSG00000034152(MAP2K3),ENSG00000069399(BCL3),ENSG00000074181(NOTCH3),ENSG00000075426(FOSL2),ENSG00000077150(NFKB2),ENSG00000095752(IL11),ENSG00000095794(CREM),ENSG00000095951(HIVEP1),ENSG00000100003(SEC14L2),ENSG00000100625(SIX4),ENSG00000100906(NFKBIA),ENSG00000101096(NFATC2),ENSG00000101928(MOSPD1),ENSG00000102554(KLF5),ENSG00000104064(GABPB1),ENSG00000104885(DOT1L),ENSG…	ENSG00000005102(MEOX1),ENSG00000064195(DLX3),ENSG00000078401(EDN1),ENSG00000085741(WNT11),ENSG00000092529(CAPN3),ENSG00000105516(DBP),ENSG00000105672(ETV2),ENSG00000111087(GLI1),ENSG00000115596(WNT6),ENSG00000115738(ID2),ENSG00000116128(BCL9),ENSG00000120075(HOXB5),ENSG00000120093(HOXB3),ENSG00000123405(NFE2),ENSG00000124496(TRERF1),ENSG00000125378(BMP4),ENSG00000126351(THRA),ENSG00000138336(TET1…
BP	GO:0051254	positive regulation of RNA metabolic process	90	50	140	1723	6.04734e-15	2.46539e-12	ENSG00000006459(KDM7A),ENSG00000034152(MAP2K3),ENSG00000069399(BCL3),ENSG00000074181(NOTCH3),ENSG00000075426(FOSL2),ENSG00000077150(NFKB2),ENSG00000095752(IL11),ENSG00000095794(CREM),ENSG00000095951(HIVEP1),ENSG00000100003(SEC14L2),ENSG00000100625(SIX4),ENSG00000100906(NFKBIA),ENSG00000101096(NFATC2),ENSG00000101928(MOSPD1),ENSG00000102554(KLF5),ENSG00000104064(GABPB1),ENSG00000104885(DOT1L),ENSG…	ENSG00000005102(MEOX1),ENSG00000064195(DLX3),ENSG00000078401(EDN1),ENSG00000085741(WNT11),ENSG00000092529(CAPN3),ENSG00000105516(DBP),ENSG00000105672(ETV2),ENSG00000111087(GLI1),ENSG00000115596(WNT6),ENSG00000115738(ID2),ENSG00000116128(BCL9),ENSG00000120075(HOXB5),ENSG00000120093(HOXB3),ENSG00000123405(NFE2),ENSG00000124496(TRERF1),ENSG00000125378(BMP4),ENSG00000126351(THRA),ENSG00000138336(TET1…
BP	GO:0006355	regulation of transcription, DNA-templated	139	95	234	3518	8.85312e-15	3.27319e-12	ENSG00000006459(KDM7A),ENSG00000010818(HIVEP2),ENSG00000027075(PRKCH),ENSG00000034152(MAP2K3),ENSG00000049759(NEDD4L),ENSG00000056558(TRAF1),ENSG00000057657(PRDM1),ENSG00000069399(BCL3),ENSG00000074181(NOTCH3),ENSG00000075426(FOSL2),ENSG00000077150(NFKB2),ENSG00000090339(ICAM1),ENSG00000095752(IL11),ENSG00000095794(CREM),ENSG00000095951(HIVEP1),ENSG00000100003(SEC14L2),ENSG00000100625(SIX4),ENSG0…	ENSG00000005102(MEOX1),ENSG00000064195(DLX3),ENSG00000069812(HES2),ENSG00000078401(EDN1),ENSG00000085741(WNT11),ENSG00000088305(DNMT3B),ENSG00000092529(CAPN3),ENSG00000100292(HMOX1),ENSG00000102984(ZNF821),ENSG00000105516(DBP),ENSG00000105672(ETV2),ENSG00000105997(HOXA3),ENSG00000108511(HOXB6),ENSG00000111087(GLI1),ENSG00000115596(WNT6),ENSG00000115738(ID2),ENSG00000116128(BCL9),ENSG00000116990(M…
BP	GO:1903506	regulation of nucleic acid-templated transcription	139	95	234	3520	9.45346e-15	3.27319e-12	ENSG00000006459(KDM7A),ENSG00000010818(HIVEP2),ENSG00000027075(PRKCH),ENSG00000034152(MAP2K3),ENSG00000049759(NEDD4L),ENSG00000056558(TRAF1),ENSG00000057657(PRDM1),ENSG00000069399(BCL3),ENSG00000074181(NOTCH3),ENSG00000075426(FOSL2),ENSG00000077150(NFKB2),ENSG00000090339(ICAM1),ENSG00000095752(IL11),ENSG00000095794(CREM),ENSG00000095951(HIVEP1),ENSG00000100003(SEC14L2),ENSG00000100625(SIX4),ENSG0…	ENSG00000005102(MEOX1),ENSG00000064195(DLX3),ENSG00000069812(HES2),ENSG00000078401(EDN1),ENSG00000085741(WNT11),ENSG00000088305(DNMT3B),ENSG00000092529(CAPN3),ENSG00000100292(HMOX1),ENSG00000102984(ZNF821),ENSG00000105516(DBP),ENSG00000105672(ETV2),ENSG00000105997(HOXA3),ENSG00000108511(HOXB6),ENSG00000111087(GLI1),ENSG00000115596(WNT6),ENSG00000115738(ID2),ENSG00000116128(BCL9),ENSG00000116990(M…
BP	GO:2001141	regulation of RNA biosynthetic process	139	95	234	3525	1.11341e-14	3.69858e-12	ENSG00000006459(KDM7A),ENSG00000010818(HIVEP2),ENSG00000027075(PRKCH),ENSG00000034152(MAP2K3),ENSG00000049759(NEDD4L),ENSG00000056558(TRAF1),ENSG00000057657(PRDM1),ENSG00000069399(BCL3),ENSG00000074181(NOTCH3),ENSG00000075426(FOSL2),ENSG00000077150(NFKB2),ENSG00000090339(ICAM1),ENSG00000095752(IL11),ENSG00000095794(CREM),ENSG00000095951(HIVEP1),ENSG00000100003(SEC14L2),ENSG00000100625(SIX4),ENSG0…	ENSG00000005102(MEOX1),ENSG00000064195(DLX3),ENSG00000069812(HES2),ENSG00000078401(EDN1),ENSG00000085741(WNT11),ENSG00000088305(DNMT3B),ENSG00000092529(CAPN3),ENSG00000100292(HMOX1),ENSG00000102984(ZNF821),ENSG00000105516(DBP),ENSG00000105672(ETV2),ENSG00000105997(HOXA3),ENSG00000108511(HOXB6),ENSG00000111087(GLI1),ENSG00000115596(WNT6),ENSG00000115738(ID2),ENSG00000116128(BCL9),ENSG00000116990(M…
BP	GO:0009891	positive regulation of biosynthetic process	100	54	154	1997	1.71316e-14	5.29838e-12	ENSG00000006459(KDM7A),ENSG00000020577(SAMD4A),ENSG00000034152(MAP2K3),ENSG00000069399(BCL3),ENSG00000074181(NOTCH3),ENSG00000075426(FOSL2),ENSG00000077150(NFKB2),ENSG00000087074(PPP1R15A),ENSG00000090339(ICAM1),ENSG00000095752(IL11),ENSG00000095794(CREM),ENSG00000095951(HIVEP1),ENSG00000100003(SEC14L2),ENSG00000100625(SIX4),ENSG00000100906(NFKBIA),ENSG00000101096(NFATC2),ENSG00000101928(MOSPD1),…	ENSG00000005102(MEOX1),ENSG00000064195(DLX3),ENSG00000078401(EDN1),ENSG00000085741(WNT11),ENSG00000092529(CAPN3),ENSG00000100078(PLA2G3),ENSG00000105516(DBP),ENSG00000105672(ETV2),ENSG00000111087(GLI1),ENSG00000115596(WNT6),ENSG00000115738(ID2),ENSG00000116128(BCL9),ENSG00000120075(HOXB5),ENSG00000120093(HOXB3),ENSG00000123405(NFE2),ENSG00000124496(TRERF1),ENSG00000125378(BMP4),ENSG00000126351(TH…
BP	GO:0007166	cell surface receptor signaling pathway	158	62	220	3026	3.60356e-18	3.23203e-14	ENSG00000004799(PDK4),ENSG00000006062(MAP3K14),ENSG00000006327(TNFRSF12A),ENSG00000011422(PLAUR),ENSG00000013588(GPRC5A),ENSG00000023445(BIRC3),ENSG00000026103(FAS),ENSG00000027075(PRKCH),ENSG00000027697(IFNGR1),ENSG00000038382(TRIO),ENSG00000049249(TNFRSF9),ENSG00000056558(TRAF1),ENSG00000069399(BCL3),ENSG00000074181(NOTCH3),ENSG00000077238(IL4R),ENSG00000081041(CXCL2),ENSG00000081985(IL12RB2),E…	ENSG00000002746(HECW1),ENSG00000078401(EDN1),ENSG00000080293(SCTR),ENSG00000082458(DLG3),ENSG00000085741(WNT11),ENSG00000099617(EFNA2),ENSG00000099875(MKNK2),ENSG00000100292(HMOX1),ENSG00000103942(HOMER2),ENSG00000104901(DKKL1),ENSG00000105672(ETV2),ENSG00000106003(LFNG),ENSG00000106018(VIPR2),ENSG00000108370(RGS9),ENSG00000108375(RNF43),ENSG00000110042(DTX4),ENSG00000111077(TNS2),ENSG00000111087…
BP	GO:0009966	regulation of signal transduction	155	64	219	3195	3.99331e-15	1.98287e-12	ENSG00000006062(MAP3K14),ENSG00000006327(TNFRSF12A),ENSG00000011422(PLAUR),ENSG00000013588(GPRC5A),ENSG00000023445(BIRC3),ENSG00000026103(FAS),ENSG00000027075(PRKCH),ENSG00000027697(IFNGR1),ENSG00000034152(MAP2K3),ENSG00000038382(TRIO),ENSG00000047365(ARAP2),ENSG00000056558(TRAF1),ENSG00000057657(PRDM1),ENSG00000059915(PSD),ENSG00000069399(BCL3),ENSG00000074181(NOTCH3),ENSG00000087074(PPP1R15A),E…	ENSG00000002746(HECW1),ENSG00000078401(EDN1),ENSG00000080293(SCTR),ENSG00000082458(DLG3),ENSG00000085741(WNT11),ENSG00000092529(CAPN3),ENSG00000100292(HMOX1),ENSG00000100302(RASD2),ENSG00000103942(HOMER2),ENSG00000104081(BMF),ENSG00000104901(DKKL1),ENSG00000106003(LFNG),ENSG00000108370(RGS9),ENSG00000108375(RNF43),ENSG00000111077(TNS2),ENSG00000111087(GLI1),ENSG00000121236(TRIM6),ENSG00000124313(…
BP	GO:0007154	cell communication	266	113	379	6626	6.03378e-15	2.46539e-12	ENSG00000004799(PDK4),ENSG00000006062(MAP3K14),ENSG00000006327(TNFRSF12A),ENSG00000011422(PLAUR),ENSG00000013588(GPRC5A),ENSG00000019186(CYP24A1),ENSG00000023445(BIRC3),ENSG00000026103(FAS),ENSG00000027075(PRKCH),ENSG00000027697(IFNGR1),ENSG00000034152(MAP2K3),ENSG00000038382(TRIO),ENSG00000047365(ARAP2),ENSG00000049249(TNFRSF9),ENSG00000056558(TRAF1),ENSG00000057657(PRDM1),ENSG00000059915(PSD),E…	ENSG00000002746(HECW1),ENSG00000078401(EDN1),ENSG00000080293(SCTR),ENSG00000082458(DLG3),ENSG00000085741(WNT11),ENSG00000092529(CAPN3),ENSG00000099617(EFNA2),ENSG00000099875(MKNK2),ENSG00000100078(PLA2G3),ENSG00000100292(HMOX1),ENSG00000100302(RASD2),ENSG00000101298(SNPH),ENSG00000102385(DRP2),ENSG00000103528(SYT17),ENSG00000103942(HOMER2),ENSG00000104081(BMF),ENSG00000104901(DKKL1),ENSG000001056…
BP	GO:0023052	signaling	262	113	375	6596	2.91141e-14	7.68012e-12	ENSG00000004799(PDK4),ENSG00000006062(MAP3K14),ENSG00000006327(TNFRSF12A),ENSG00000011422(PLAUR),ENSG00000013588(GPRC5A),ENSG00000019186(CYP24A1),ENSG00000023445(BIRC3),ENSG00000026103(FAS),ENSG00000027075(PRKCH),ENSG00000027697(IFNGR1),ENSG00000034152(MAP2K3),ENSG00000038382(TRIO),ENSG00000047365(ARAP2),ENSG00000049249(TNFRSF9),ENSG00000056558(TRAF1),ENSG00000057657(PRDM1),ENSG00000059915(PSD),E…	ENSG00000002746(HECW1),ENSG00000078401(EDN1),ENSG00000080293(SCTR),ENSG00000082458(DLG3),ENSG00000085741(WNT11),ENSG00000092529(CAPN3),ENSG00000099617(EFNA2),ENSG00000099875(MKNK2),ENSG00000100078(PLA2G3),ENSG00000100292(HMOX1),ENSG00000100302(RASD2),ENSG00000101298(SNPH),ENSG00000102385(DRP2),ENSG00000103528(SYT17),ENSG00000103942(HOMER2),ENSG00000104081(BMF),ENSG00000104901(DKKL1),ENSG000001056…
BP	GO:0007165	signal transduction	247	103	350	6109	2.12384e-13	4.05292e-11	ENSG00000004799(PDK4),ENSG00000006062(MAP3K14),ENSG00000006327(TNFRSF12A),ENSG00000011422(PLAUR),ENSG00000013588(GPRC5A),ENSG00000019186(CYP24A1),ENSG00000023445(BIRC3),ENSG00000026103(FAS),ENSG00000027075(PRKCH),ENSG00000027697(IFNGR1),ENSG00000034152(MAP2K3),ENSG00000038382(TRIO),ENSG00000047365(ARAP2),ENSG00000049249(TNFRSF9),ENSG00000056558(TRAF1),ENSG00000057657(PRDM1),ENSG00000059915(PSD),E…	ENSG00000002746(HECW1),ENSG00000078401(EDN1),ENSG00000080293(SCTR),ENSG00000082458(DLG3),ENSG00000085741(WNT11),ENSG00000092529(CAPN3),ENSG00000099617(EFNA2),ENSG00000099875(MKNK2),ENSG00000100292(HMOX1),ENSG00000100302(RASD2),ENSG00000103942(HOMER2),ENSG00000104081(BMF),ENSG00000104901(DKKL1),ENSG00000105672(ETV2),ENSG00000106003(LFNG),ENSG00000106018(VIPR2),ENSG00000108370(RGS9),ENSG00000108375…
BP	GO:0035556	intracellular signal transduction	140	48	188	2829	1.42794e-11	1.6009e-09	ENSG00000006062(MAP3K14),ENSG00000011422(PLAUR),ENSG00000023445(BIRC3),ENSG00000026103(FAS),ENSG00000027075(PRKCH),ENSG00000034152(MAP2K3),ENSG00000038382(TRIO),ENSG00000047365(ARAP2),ENSG00000056558(TRAF1),ENSG00000057657(PRDM1),ENSG00000059915(PSD),ENSG00000069399(BCL3),ENSG00000077150(NFKB2),ENSG00000087074(PPP1R15A),ENSG00000090339(ICAM1),ENSG00000095752(IL11),ENSG00000100276(RASL10A),ENSG000…	ENSG00000078401(EDN1),ENSG00000080293(SCTR),ENSG00000082458(DLG3),ENSG00000085741(WNT11),ENSG00000092529(CAPN3),ENSG00000099875(MKNK2),ENSG00000100292(HMOX1),ENSG00000100302(RASD2),ENSG00000103942(HOMER2),ENSG00000104081(BMF),ENSG00000108370(RGS9),ENSG00000111077(TNS2),ENSG00000111671(SPSB2),ENSG00000121236(TRIM6),ENSG00000124313(IQSEC2),ENSG00000125378(BMP4),ENSG00000129474(AJUBA),ENSG0000013005…
BP	GO:0010646	regulation of cell communication	164	72	236	3590	2.46118e-14	6.89824e-12	ENSG00000006062(MAP3K14),ENSG00000006327(TNFRSF12A),ENSG00000011422(PLAUR),ENSG00000013588(GPRC5A),ENSG00000023445(BIRC3),ENSG00000026103(FAS),ENSG00000027075(PRKCH),ENSG00000027697(IFNGR1),ENSG00000034152(MAP2K3),ENSG00000038382(TRIO),ENSG00000047365(ARAP2),ENSG00000056558(TRAF1),ENSG00000057657(PRDM1),ENSG00000059915(PSD),ENSG00000069399(BCL3),ENSG00000074181(NOTCH3),ENSG00000087074(PPP1R15A),E…	ENSG00000002746(HECW1),ENSG00000078401(EDN1),ENSG00000080293(SCTR),ENSG00000082458(DLG3),ENSG00000085741(WNT11),ENSG00000092529(CAPN3),ENSG00000100078(PLA2G3),ENSG00000100292(HMOX1),ENSG00000100302(RASD2),ENSG00000103528(SYT17),ENSG00000103942(HOMER2),ENSG00000104081(BMF),ENSG00000104901(DKKL1),ENSG00000105649(RAB3A),ENSG00000106003(LFNG),ENSG00000108370(RGS9),ENSG00000108375(RNF43),ENSG000001110…
BP	GO:0019221	cytokine-mediated signaling pathway	58	9	67	797	4.13194e-08	2.47063e-06	ENSG00000006062(MAP3K14),ENSG00000006327(TNFRSF12A),ENSG00000023445(BIRC3),ENSG00000026103(FAS),ENSG00000027697(IFNGR1),ENSG00000049249(TNFRSF9),ENSG00000056558(TRAF1),ENSG00000077238(IL4R),ENSG00000081041(CXCL2),ENSG00000081985(IL12RB2),ENSG00000090339(ICAM1),ENSG00000095752(IL11),ENSG00000100902(PSMA6),ENSG00000100906(NFKBIA),ENSG00000108688(CCL7),ENSG00000108691(CCL2),ENSG00000109320(NFKB1),EN…	ENSG00000078401(EDN1),ENSG00000100292(HMOX1),ENSG00000121236(TRIM6),ENSG00000125657(TNFSF9),ENSG00000143365(RORC),ENSG00000174804(FZD4),ENSG00000187266(EPOR),ENSG00000245848(CEBPA),ENSG00000278828(H3C10)
BP	GO:0002376	immune system process	136	44	180	3086	9.1672e-07	3.78897e-05	ENSG00000006062(MAP3K14),ENSG00000008513(ST3GAL1),ENSG00000011422(PLAUR),ENSG00000023445(BIRC3),ENSG00000026103(FAS),ENSG00000027075(PRKCH),ENSG00000027697(IFNGR1),ENSG00000057657(PRDM1),ENSG00000069399(BCL3),ENSG00000077150(NFKB2),ENSG00000077238(IL4R),ENSG00000081041(CXCL2),ENSG00000086062(B4GALT1),ENSG00000090339(ICAM1),ENSG00000095752(IL11),ENSG00000100060(MFNG),ENSG00000100625(SIX4),ENSG0000…	ENSG00000005102(MEOX1),ENSG00000078401(EDN1),ENSG00000080293(SCTR),ENSG00000099617(EFNA2),ENSG00000099875(MKNK2),ENSG00000100078(PLA2G3),ENSG00000100292(HMOX1),ENSG00000105514(RAB3D),ENSG00000105649(RAB3A),ENSG00000105672(ETV2),ENSG00000105997(HOXA3),ENSG00000106003(LFNG),ENSG00000106018(VIPR2),ENSG00000108511(HOXB6),ENSG00000115738(ID2),ENSG00000120093(HOXB3),ENSG00000121236(TRIM6),ENSG000001234…
BP	GO:0006954	inflammatory response	60	11	71	849	1.95636e-08	1.29019e-06	ENSG00000023445(BIRC3),ENSG00000027697(IFNGR1),ENSG00000034152(MAP2K3),ENSG00000077238(IL4R),ENSG00000081041(CXCL2),ENSG00000086062(B4GALT1),ENSG00000090339(ICAM1),ENSG00000100902(PSMA6),ENSG00000100906(NFKBIA),ENSG00000104856(RELB),ENSG00000105835(NAMPT),ENSG00000108688(CCL7),ENSG00000108691(CCL2),ENSG00000108840(HDAC5),ENSG00000109320(NFKB1),ENSG00000110330(BIRC2),ENSG00000115008(IL1A),ENSG0000…	ENSG00000080293(SCTR),ENSG00000100078(PLA2G3),ENSG00000100292(HMOX1),ENSG00000106018(VIPR2),ENSG00000110921(MVK),ENSG00000139187(KLRG1),ENSG00000163485(ADORA1),ENSG00000164850(GPER1),ENSG00000176046(NUPR1),ENSG00000204882(GPR20),ENSG00000245848(CEBPA)
BP	GO:0006952	defense response	92	18	110	1775	1.60393e-05	0.000464788	ENSG00000006062(MAP3K14),ENSG00000023445(BIRC3),ENSG00000027697(IFNGR1),ENSG00000034152(MAP2K3),ENSG00000057657(PRDM1),ENSG00000069399(BCL3),ENSG00000077238(IL4R),ENSG00000081041(CXCL2),ENSG00000086062(B4GALT1),ENSG00000090339(ICAM1),ENSG00000100902(PSMA6),ENSG00000100906(NFKBIA),ENSG00000104856(RELB),ENSG00000105835(NAMPT),ENSG00000107201(DDX58),ENSG00000108688(CCL7),ENSG00000108691(CCL2),ENSG00…	ENSG00000078401(EDN1),ENSG00000080293(SCTR),ENSG00000100078(PLA2G3),ENSG00000100292(HMOX1),ENSG00000106018(VIPR2),ENSG00000110921(MVK),ENSG00000121236(TRIM6),ENSG00000135148(TRAFD1),ENSG00000139187(KLRG1),ENSG00000153029(MR1),ENSG00000162931(TRIM17),ENSG00000163485(ADORA1),ENSG00000164850(GPER1),ENSG00000176046(NUPR1),ENSG00000198933(TBKBP1),ENSG00000204882(GPR20),ENSG00000245848(CEBPA),ENSG00000…
BP	GO:0048585	negative regulation of response to stimulus	106	37	143	1798	1.65007e-14	5.28553e-12	ENSG00000003436(TFPI),ENSG00000011422(PLAUR),ENSG00000013588(GPRC5A),ENSG00000026103(FAS),ENSG00000034152(MAP2K3),ENSG00000069399(BCL3),ENSG00000074181(NOTCH3),ENSG00000077238(IL4R),ENSG00000087074(PPP1R15A),ENSG00000090339(ICAM1),ENSG00000100902(PSMA6),ENSG00000100906(NFKBIA),ENSG00000105835(NAMPT),ENSG00000107984(DKK1),ENSG00000108691(CCL2),ENSG00000109320(NFKB1),ENSG00000109321(AREG),ENSG00000…	ENSG00000002746(HECW1),ENSG00000078401(EDN1),ENSG00000080293(SCTR),ENSG00000085741(WNT11),ENSG00000089723(OTUB2),ENSG00000100292(HMOX1),ENSG00000103942(HOMER2),ENSG00000104901(DKKL1),ENSG00000106003(LFNG),ENSG00000106018(VIPR2),ENSG00000108370(RGS9),ENSG00000108375(RNF43),ENSG00000110921(MVK),ENSG00000111077(TNS2),ENSG00000111087(GLI1),ENSG00000125378(BMP4),ENSG00000129474(AJUBA),ENSG00000135148(…
BP	GO:0048583	regulation of response to stimulus	195	77	272	4301	9.48856e-15	3.27319e-12	ENSG00000003436(TFPI),ENSG00000006062(MAP3K14),ENSG00000006327(TNFRSF12A),ENSG00000011422(PLAUR),ENSG00000013588(GPRC5A),ENSG00000023445(BIRC3),ENSG00000026103(FAS),ENSG00000027075(PRKCH),ENSG00000027697(IFNGR1),ENSG00000034152(MAP2K3),ENSG00000038382(TRIO),ENSG00000047365(ARAP2),ENSG00000056558(TRAF1),ENSG00000057657(PRDM1),ENSG00000059915(PSD),ENSG00000069399(BCL3),ENSG00000074181(NOTCH3),ENSG0…	ENSG00000002746(HECW1),ENSG00000078401(EDN1),ENSG00000080293(SCTR),ENSG00000082458(DLG3),ENSG00000085741(WNT11),ENSG00000089723(OTUB2),ENSG00000092529(CAPN3),ENSG00000100078(PLA2G3),ENSG00000100292(HMOX1),ENSG00000100302(RASD2),ENSG00000103528(SYT17),ENSG00000103942(HOMER2),ENSG00000104081(BMF),ENSG00000104901(DKKL1),ENSG00000105649(RAB3A),ENSG00000106003(LFNG),ENSG00000106018(VIPR2),ENSG00000108…
BP	GO:0050896	response to stimulus	323	138	461	9114	1.23793e-09	9.91338e-08	ENSG00000003436(TFPI),ENSG00000004799(PDK4),ENSG00000005812(FBXL3),ENSG00000006062(MAP3K14),ENSG00000006327(TNFRSF12A),ENSG00000008513(ST3GAL1),ENSG00000011422(PLAUR),ENSG00000013588(GPRC5A),ENSG00000019186(CYP24A1),ENSG00000023171(GRAMD1B),ENSG00000023445(BIRC3),ENSG00000026103(FAS),ENSG00000027075(PRKCH),ENSG00000027697(IFNGR1),ENSG00000034152(MAP2K3),ENSG00000038382(TRIO),ENSG00000047365(ARAP2…	ENSG00000002746(HECW1),ENSG00000006025(OSBPL7),ENSG00000078401(EDN1),ENSG00000080293(SCTR),ENSG00000082458(DLG3),ENSG00000085741(WNT11),ENSG00000088305(DNMT3B),ENSG00000089723(OTUB2),ENSG00000092529(CAPN3),ENSG00000099617(EFNA2),ENSG00000099875(MKNK2),ENSG00000100078(PLA2G3),ENSG00000100292(HMOX1),ENSG00000100302(RASD2),ENSG00000102934(PLLP),ENSG00000103528(SYT17),ENSG00000103942(HOMER2),ENSG0000…
BP	GO:0051716	cellular response to stimulus	290	116	406	7552	8.20263e-12	9.43198e-10	ENSG00000003436(TFPI),ENSG00000004799(PDK4),ENSG00000006062(MAP3K14),ENSG00000006327(TNFRSF12A),ENSG00000011422(PLAUR),ENSG00000013588(GPRC5A),ENSG00000019186(CYP24A1),ENSG00000023171(GRAMD1B),ENSG00000023445(BIRC3),ENSG00000026103(FAS),ENSG00000027075(PRKCH),ENSG00000027697(IFNGR1),ENSG00000034152(MAP2K3),ENSG00000038382(TRIO),ENSG00000047365(ARAP2),ENSG00000049249(TNFRSF9),ENSG00000056558(TRAF1…	ENSG00000002746(HECW1),ENSG00000006025(OSBPL7),ENSG00000078401(EDN1),ENSG00000080293(SCTR),ENSG00000082458(DLG3),ENSG00000085741(WNT11),ENSG00000088305(DNMT3B),ENSG00000089723(OTUB2),ENSG00000092529(CAPN3),ENSG00000099617(EFNA2),ENSG00000099875(MKNK2),ENSG00000100292(HMOX1),ENSG00000100302(RASD2),ENSG00000103528(SYT17),ENSG00000103942(HOMER2),ENSG00000104081(BMF),ENSG00000104901(DKKL1),ENSG000001…
BP	GO:0070887	cellular response to chemical stimulus	163	52	215	3351	7.74996e-12	9.02719e-10	ENSG00000003436(TFPI),ENSG00000004799(PDK4),ENSG00000006062(MAP3K14),ENSG00000006327(TNFRSF12A),ENSG00000019186(CYP24A1),ENSG00000023171(GRAMD1B),ENSG00000023445(BIRC3),ENSG00000026103(FAS),ENSG00000027697(IFNGR1),ENSG00000034152(MAP2K3),ENSG00000049249(TNFRSF9),ENSG00000056558(TRAF1),ENSG00000065621(GSTO2),ENSG00000077238(IL4R),ENSG00000081041(CXCL2),ENSG00000081985(IL12RB2),ENSG00000087074(PPP1…	ENSG00000006025(OSBPL7),ENSG00000078401(EDN1),ENSG00000085741(WNT11),ENSG00000088305(DNMT3B),ENSG00000092529(CAPN3),ENSG00000099875(MKNK2),ENSG00000100292(HMOX1),ENSG00000103528(SYT17),ENSG00000105672(ETV2),ENSG00000108370(RGS9),ENSG00000111077(TNS2),ENSG00000115596(WNT6),ENSG00000121236(TRIM6),ENSG00000124496(TRERF1),ENSG00000125378(BMP4),ENSG00000125657(TNFSF9),ENSG00000126351(THRA),ENSG0000012…
BP	GO:0009605	response to external stimulus	140	38	178	2949	1.04301e-07	5.66954e-06	ENSG00000003436(TFPI),ENSG00000004799(PDK4),ENSG00000005812(FBXL3),ENSG00000006062(MAP3K14),ENSG00000011422(PLAUR),ENSG00000019186(CYP24A1),ENSG00000023445(BIRC3),ENSG00000026103(FAS),ENSG00000027697(IFNGR1),ENSG00000038382(TRIO),ENSG00000057657(PRDM1),ENSG00000069399(BCL3),ENSG00000074181(NOTCH3),ENSG00000077150(NFKB2),ENSG00000077238(IL4R),ENSG00000081041(CXCL2),ENSG00000081985(IL12RB2),ENSG000…	ENSG00000078401(EDN1),ENSG00000080293(SCTR),ENSG00000085741(WNT11),ENSG00000088305(DNMT3B),ENSG00000092529(CAPN3),ENSG00000099617(EFNA2),ENSG00000100078(PLA2G3),ENSG00000100292(HMOX1),ENSG00000106018(VIPR2),ENSG00000110921(MVK),ENSG00000115738(ID2),ENSG00000121236(TRIM6),ENSG00000125378(BMP4),ENSG00000125966(MMP24),ENSG00000131711(MAP1B),ENSG00000134215(VAV3),ENSG00000135148(TRAFD1),ENSG000001378…
BP	GO:0010033	response to organic substance	160	45	205	3343	1.77801e-09	1.39886e-07	ENSG00000003436(TFPI),ENSG00000004799(PDK4),ENSG00000006062(MAP3K14),ENSG00000006327(TNFRSF12A),ENSG00000019186(CYP24A1),ENSG00000023171(GRAMD1B),ENSG00000023445(BIRC3),ENSG00000026103(FAS),ENSG00000027697(IFNGR1),ENSG00000034152(MAP2K3),ENSG00000049249(TNFRSF9),ENSG00000056558(TRAF1),ENSG00000077150(NFKB2),ENSG00000077238(IL4R),ENSG00000081041(CXCL2),ENSG00000081985(IL12RB2),ENSG00000087074(PPP1…	ENSG00000006025(OSBPL7),ENSG00000078401(EDN1),ENSG00000085741(WNT11),ENSG00000088305(DNMT3B),ENSG00000100292(HMOX1),ENSG00000103942(HOMER2),ENSG00000105672(ETV2),ENSG00000108370(RGS9),ENSG00000111077(TNS2),ENSG00000115596(WNT6),ENSG00000121236(TRIM6),ENSG00000124496(TRERF1),ENSG00000125378(BMP4),ENSG00000125657(TNFSF9),ENSG00000126351(THRA),ENSG00000131711(MAP1B),ENSG00000134986(NREP),ENSG0000013…
BP	GO:0050896	response to stimulus	323	138	461	9114	1.23793e-09	9.91338e-08	ENSG00000003436(TFPI),ENSG00000004799(PDK4),ENSG00000005812(FBXL3),ENSG00000006062(MAP3K14),ENSG00000006327(TNFRSF12A),ENSG00000008513(ST3GAL1),ENSG00000011422(PLAUR),ENSG00000013588(GPRC5A),ENSG00000019186(CYP24A1),ENSG00000023171(GRAMD1B),ENSG00000023445(BIRC3),ENSG00000026103(FAS),ENSG00000027075(PRKCH),ENSG00000027697(IFNGR1),ENSG00000034152(MAP2K3),ENSG00000038382(TRIO),ENSG00000047365(ARAP2…	ENSG00000002746(HECW1),ENSG00000006025(OSBPL7),ENSG00000078401(EDN1),ENSG00000080293(SCTR),ENSG00000082458(DLG3),ENSG00000085741(WNT11),ENSG00000088305(DNMT3B),ENSG00000089723(OTUB2),ENSG00000092529(CAPN3),ENSG00000099617(EFNA2),ENSG00000099875(MKNK2),ENSG00000100078(PLA2G3),ENSG00000100292(HMOX1),ENSG00000100302(RASD2),ENSG00000102934(PLLP),ENSG00000103528(SYT17),ENSG00000103942(HOMER2),ENSG0000…
BP	GO:0034097	response to cytokine	85	11	96	1200	5.11275e-10	4.32606e-08	ENSG00000003436(TFPI),ENSG00000006062(MAP3K14),ENSG00000006327(TNFRSF12A),ENSG00000023445(BIRC3),ENSG00000026103(FAS),ENSG00000027697(IFNGR1),ENSG00000049249(TNFRSF9),ENSG00000056558(TRAF1),ENSG00000077150(NFKB2),ENSG00000077238(IL4R),ENSG00000081041(CXCL2),ENSG00000081985(IL12RB2),ENSG00000090339(ICAM1),ENSG00000095752(IL11),ENSG00000100902(PSMA6),ENSG00000100906(NFKBIA),ENSG00000102554(KLF5),EN…	ENSG00000078401(EDN1),ENSG00000100292(HMOX1),ENSG00000121236(TRIM6),ENSG00000125657(TNFSF9),ENSG00000143365(RORC),ENSG00000164850(GPER1),ENSG00000165029(ABCA1),ENSG00000174804(FZD4),ENSG00000187266(EPOR),ENSG00000245848(CEBPA),ENSG00000278828(H3C10)
BP	GO:0042221	response to chemical	194	69	263	4816	2.86302e-07	1.3515e-05	ENSG00000003436(TFPI),ENSG00000004799(PDK4),ENSG00000006062(MAP3K14),ENSG00000006327(TNFRSF12A),ENSG00000011422(PLAUR),ENSG00000019186(CYP24A1),ENSG00000023171(GRAMD1B),ENSG00000023445(BIRC3),ENSG00000026103(FAS),ENSG00000027697(IFNGR1),ENSG00000034152(MAP2K3),ENSG00000038382(TRIO),ENSG00000049249(TNFRSF9),ENSG00000049759(NEDD4L),ENSG00000056558(TRAF1),ENSG00000065621(GSTO2),ENSG00000074181(NOTCH…	ENSG00000006025(OSBPL7),ENSG00000078401(EDN1),ENSG00000085741(WNT11),ENSG00000088305(DNMT3B),ENSG00000092529(CAPN3),ENSG00000099617(EFNA2),ENSG00000099875(MKNK2),ENSG00000100292(HMOX1),ENSG00000103528(SYT17),ENSG00000103942(HOMER2),ENSG00000105649(RAB3A),ENSG00000105672(ETV2),ENSG00000108370(RGS9),ENSG00000111077(TNS2),ENSG00000115596(WNT6),ENSG00000121236(TRIM6),ENSG00000124140(SLC12A5),ENSG0000…
BP	GO:0071345	cellular response to cytokine stimulus	76	11	87	1112	1.05349e-08	7.38187e-07	ENSG00000003436(TFPI),ENSG00000006062(MAP3K14),ENSG00000006327(TNFRSF12A),ENSG00000023445(BIRC3),ENSG00000026103(FAS),ENSG00000027697(IFNGR1),ENSG00000049249(TNFRSF9),ENSG00000056558(TRAF1),ENSG00000077238(IL4R),ENSG00000081041(CXCL2),ENSG00000081985(IL12RB2),ENSG00000090339(ICAM1),ENSG00000095752(IL11),ENSG00000100902(PSMA6),ENSG00000100906(NFKBIA),ENSG00000102554(KLF5),ENSG00000108688(CCL7),ENS…	ENSG00000078401(EDN1),ENSG00000100292(HMOX1),ENSG00000121236(TRIM6),ENSG00000125657(TNFSF9),ENSG00000143365(RORC),ENSG00000164850(GPER1),ENSG00000165029(ABCA1),ENSG00000174804(FZD4),ENSG00000187266(EPOR),ENSG00000245848(CEBPA),ENSG00000278828(H3C10)
BP	GO:0071310	cellular response to organic substance	138	41	179	2742	2.3619e-10	2.16162e-08	ENSG00000003436(TFPI),ENSG00000004799(PDK4),ENSG00000006062(MAP3K14),ENSG00000006327(TNFRSF12A),ENSG00000019186(CYP24A1),ENSG00000023171(GRAMD1B),ENSG00000023445(BIRC3),ENSG00000026103(FAS),ENSG00000027697(IFNGR1),ENSG00000034152(MAP2K3),ENSG00000049249(TNFRSF9),ENSG00000056558(TRAF1),ENSG00000077238(IL4R),ENSG00000081041(CXCL2),ENSG00000081985(IL12RB2),ENSG00000087074(PPP1R15A),ENSG00000090339(I…	ENSG00000006025(OSBPL7),ENSG00000078401(EDN1),ENSG00000085741(WNT11),ENSG00000088305(DNMT3B),ENSG00000100292(HMOX1),ENSG00000105672(ETV2),ENSG00000108370(RGS9),ENSG00000111077(TNS2),ENSG00000115596(WNT6),ENSG00000121236(TRIM6),ENSG00000124496(TRERF1),ENSG00000125378(BMP4),ENSG00000125657(TNFSF9),ENSG00000126351(THRA),ENSG00000131711(MAP1B),ENSG00000134986(NREP),ENSG00000135253(KCP),ENSG0000014162…
BP	GO:0001775	cell activation	75	18	93	1419	9.25857e-06	0.000301964	ENSG00000008513(ST3GAL1),ENSG00000011422(PLAUR),ENSG00000027075(PRKCH),ENSG00000027697(IFNGR1),ENSG00000057657(PRDM1),ENSG00000069399(BCL3),ENSG00000077150(NFKB2),ENSG00000077238(IL4R),ENSG00000086062(B4GALT1),ENSG00000090339(ICAM1),ENSG00000095752(IL11),ENSG00000100060(MFNG),ENSG00000101096(NFATC2),ENSG00000102554(KLF5),ENSG00000103196(CRISPLD2),ENSG00000104856(RELB),ENSG00000104903(LYL1),ENSG00…	ENSG00000078401(EDN1),ENSG00000092529(CAPN3),ENSG00000100078(PLA2G3),ENSG00000100292(HMOX1),ENSG00000105514(RAB3D),ENSG00000105649(RAB3A),ENSG00000106003(LFNG),ENSG00000115738(ID2),ENSG00000125378(BMP4),ENSG00000125657(TNFSF9),ENSG00000134215(VAV3),ENSG00000143365(RORC),ENSG00000153029(MR1),ENSG00000160685(ZBTB7B),ENSG00000164850(GPER1),ENSG00000177732(SOX12),ENSG00000204103(MAFB),ENSG00000245848…
BP	GO:1902680	positive regulation of RNA biosynthetic process	87	50	137	1631	8.87652e-16	6.63446e-13	ENSG00000006459(KDM7A),ENSG00000034152(MAP2K3),ENSG00000069399(BCL3),ENSG00000074181(NOTCH3),ENSG00000075426(FOSL2),ENSG00000077150(NFKB2),ENSG00000095752(IL11),ENSG00000095794(CREM),ENSG00000095951(HIVEP1),ENSG00000100003(SEC14L2),ENSG00000100625(SIX4),ENSG00000100906(NFKBIA),ENSG00000101096(NFATC2),ENSG00000101928(MOSPD1),ENSG00000102554(KLF5),ENSG00000104064(GABPB1),ENSG00000104885(DOT1L),ENSG…	ENSG00000005102(MEOX1),ENSG00000064195(DLX3),ENSG00000078401(EDN1),ENSG00000085741(WNT11),ENSG00000092529(CAPN3),ENSG00000105516(DBP),ENSG00000105672(ETV2),ENSG00000111087(GLI1),ENSG00000115596(WNT6),ENSG00000115738(ID2),ENSG00000116128(BCL9),ENSG00000120075(HOXB5),ENSG00000120093(HOXB3),ENSG00000123405(NFE2),ENSG00000124496(TRERF1),ENSG00000125378(BMP4),ENSG00000126351(THRA),ENSG00000138336(TET1…
BP	GO:0042127	regulation of cell population proliferation	93	37	130	1654	8.13952e-13	1.18608e-10	ENSG00000027075(PRKCH),ENSG00000049249(TNFRSF9),ENSG00000057657(PRDM1),ENSG00000075426(FOSL2),ENSG00000077238(IL4R),ENSG00000081985(IL12RB2),ENSG00000086062(B4GALT1),ENSG00000095752(IL11),ENSG00000100625(SIX4),ENSG00000100906(NFKBIA),ENSG00000101096(NFATC2),ENSG00000102554(KLF5),ENSG00000104885(DOT1L),ENSG00000105835(NAMPT),ENSG00000108691(CCL2),ENSG00000109321(AREG),ENSG00000110330(BIRC2),ENSG00…	ENSG00000072195(SPEG),ENSG00000078401(EDN1),ENSG00000082458(DLG3),ENSG00000085741(WNT11),ENSG00000100292(HMOX1),ENSG00000101224(CDC25B),ENSG00000105997(HOXA3),ENSG00000106018(VIPR2),ENSG00000111077(TNS2),ENSG00000111087(GLI1),ENSG00000115738(ID2),ENSG00000123080(CDKN2C),ENSG00000125378(BMP4),ENSG00000125657(TNFSF9),ENSG00000129521(EGLN3),ENSG00000134215(VAV3),ENSG00000138336(TET1),ENSG00000141570…
BP	GO:0051239	regulation of multicellular organismal process	162	67	229	3256	3.006e-17	1.34804e-13	ENSG00000003436(TFPI),ENSG00000004799(PDK4),ENSG00000011422(PLAUR),ENSG00000023445(BIRC3),ENSG00000027075(PRKCH),ENSG00000027697(IFNGR1),ENSG00000034152(MAP2K3),ENSG00000049759(NEDD4L),ENSG00000057657(PRDM1),ENSG00000067798(NAV3),ENSG00000069399(BCL3),ENSG00000077150(NFKB2),ENSG00000077238(IL4R),ENSG00000081985(IL12RB2),ENSG00000090339(ICAM1),ENSG00000100625(SIX4),ENSG00000100902(PSMA6),ENSG00000…	ENSG00000002746(HECW1),ENSG00000069812(HES2),ENSG00000078401(EDN1),ENSG00000085741(WNT11),ENSG00000088305(DNMT3B),ENSG00000092529(CAPN3),ENSG00000100078(PLA2G3),ENSG00000100292(HMOX1),ENSG00000103528(SYT17),ENSG00000103942(HOMER2),ENSG00000105672(ETV2),ENSG00000106003(LFNG),ENSG00000110042(DTX4),ENSG00000111087(GLI1),ENSG00000115596(WNT6),ENSG00000115738(ID2),ENSG00000116990(MYCL),ENSG00000119915…
BP	GO:0051240	positive regulation of multicellular organismal process	96	34	130	1812	4.2588e-10	3.63782e-08	ENSG00000023445(BIRC3),ENSG00000027075(PRKCH),ENSG00000027697(IFNGR1),ENSG00000034152(MAP2K3),ENSG00000049759(NEDD4L),ENSG00000069399(BCL3),ENSG00000077150(NFKB2),ENSG00000077238(IL4R),ENSG00000081985(IL12RB2),ENSG00000090339(ICAM1),ENSG00000100625(SIX4),ENSG00000105855(ITGB8),ENSG00000107201(DDX58),ENSG00000107984(DKK1),ENSG00000109320(NFKB1),ENSG00000110218(PANX1),ENSG00000110330(BIRC2),ENSG000…	ENSG00000078401(EDN1),ENSG00000085741(WNT11),ENSG00000088305(DNMT3B),ENSG00000100078(PLA2G3),ENSG00000100292(HMOX1),ENSG00000103528(SYT17),ENSG00000111087(GLI1),ENSG00000115596(WNT6),ENSG00000115738(ID2),ENSG00000119915(ELOVL3),ENSG00000121236(TRIM6),ENSG00000125378(BMP4),ENSG00000125657(TNFSF9),ENSG00000126351(THRA),ENSG00000131711(MAP1B),ENSG00000141576(RNF157),ENSG00000156466(GDF6),ENSG0000016…
BP	GO:0048518	positive regulation of biological process	250	117	367	6230	2.11574e-16	3.79522e-13	ENSG00000006062(MAP3K14),ENSG00000006327(TNFRSF12A),ENSG00000006459(KDM7A),ENSG00000011422(PLAUR),ENSG00000013588(GPRC5A),ENSG00000020577(SAMD4A),ENSG00000023445(BIRC3),ENSG00000026103(FAS),ENSG00000027075(PRKCH),ENSG00000027697(IFNGR1),ENSG00000034152(MAP2K3),ENSG00000038382(TRIO),ENSG00000049759(NEDD4L),ENSG00000056558(TRAF1),ENSG00000057657(PRDM1),ENSG00000064270(ATP2C2),ENSG00000067798(NAV3),…	ENSG00000001460(STPG1),ENSG00000002746(HECW1),ENSG00000005102(MEOX1),ENSG00000006025(OSBPL7),ENSG00000064195(DLX3),ENSG00000078401(EDN1),ENSG00000080293(SCTR),ENSG00000082458(DLG3),ENSG00000085741(WNT11),ENSG00000088305(DNMT3B),ENSG00000092529(CAPN3),ENSG00000100078(PLA2G3),ENSG00000100292(HMOX1),ENSG00000100302(RASD2),ENSG00000101224(CDC25B),ENSG00000103528(SYT17),ENSG00000104081(BMF),ENSG000001…
BP	GO:0008283	cell population proliferation	102	39	141	1937	2.23689e-11	2.41719e-09	ENSG00000027075(PRKCH),ENSG00000049249(TNFRSF9),ENSG00000057657(PRDM1),ENSG00000075426(FOSL2),ENSG00000077238(IL4R),ENSG00000081985(IL12RB2),ENSG00000086062(B4GALT1),ENSG00000095752(IL11),ENSG00000100625(SIX4),ENSG00000100906(NFKBIA),ENSG00000101096(NFATC2),ENSG00000102554(KLF5),ENSG00000104885(DOT1L),ENSG00000105835(NAMPT),ENSG00000108691(CCL2),ENSG00000109321(AREG),ENSG00000110330(BIRC2),ENSG00…	ENSG00000072195(SPEG),ENSG00000078401(EDN1),ENSG00000082458(DLG3),ENSG00000085741(WNT11),ENSG00000100292(HMOX1),ENSG00000101224(CDC25B),ENSG00000105997(HOXA3),ENSG00000106018(VIPR2),ENSG00000108375(RNF43),ENSG00000111077(TNS2),ENSG00000111087(GLI1),ENSG00000115738(ID2),ENSG00000123080(CDKN2C),ENSG00000125378(BMP4),ENSG00000125657(TNFSF9),ENSG00000129521(EGLN3),ENSG00000134215(VAV3),ENSG0000013833…
BP	GO:0007155	cell adhesion	76	17	93	1472	3.84913e-05	0.000945832	ENSG00000006327(TNFRSF12A),ENSG00000011422(PLAUR),ENSG00000077238(IL4R),ENSG00000086062(B4GALT1),ENSG00000090339(ICAM1),ENSG00000102531(FNDC3A),ENSG00000105855(ITGB8),ENSG00000108691(CCL2),ENSG00000112149(CD83),ENSG00000115008(IL1A),ENSG00000117586(TNFSF4),ENSG00000118513(MYB),ENSG00000119508(NR4A3),ENSG00000120129(DUSP1),ENSG00000124145(SDC4),ENSG00000124466(LYPD3),ENSG00000125347(IRF1),ENSG0000…	ENSG00000076826(CAMSAP3),ENSG00000080854(IGSF9B),ENSG00000082458(DLG3),ENSG00000106823(ECM2),ENSG00000125378(BMP4),ENSG00000125657(TNFSF9),ENSG00000125966(MMP24),ENSG00000129474(AJUBA),ENSG00000134215(VAV3),ENSG00000154654(NCAM2),ENSG00000160685(ZBTB7B),ENSG00000160963(COL26A1),ENSG00000164741(DLC1),ENSG00000170382(LRRN2),ENSG00000174804(FZD4),ENSG00000177732(SOX12),ENSG00000182580(EPHB3)
BP	GO:0022610	biological adhesion	76	18	94	1479	2.77204e-05	0.000720651	ENSG00000006327(TNFRSF12A),ENSG00000011422(PLAUR),ENSG00000077238(IL4R),ENSG00000086062(B4GALT1),ENSG00000090339(ICAM1),ENSG00000102531(FNDC3A),ENSG00000105855(ITGB8),ENSG00000108691(CCL2),ENSG00000112149(CD83),ENSG00000115008(IL1A),ENSG00000117586(TNFSF4),ENSG00000118513(MYB),ENSG00000119508(NR4A3),ENSG00000120129(DUSP1),ENSG00000124145(SDC4),ENSG00000124466(LYPD3),ENSG00000125347(IRF1),ENSG0000…	ENSG00000076826(CAMSAP3),ENSG00000080854(IGSF9B),ENSG00000082458(DLG3),ENSG00000106823(ECM2),ENSG00000125378(BMP4),ENSG00000125657(TNFSF9),ENSG00000125966(MMP24),ENSG00000129474(AJUBA),ENSG00000134215(VAV3),ENSG00000154654(NCAM2),ENSG00000160685(ZBTB7B),ENSG00000160963(COL26A1),ENSG00000164741(DLC1),ENSG00000170382(LRRN2),ENSG00000172061(LRRC15),ENSG00000174804(FZD4),ENSG00000177732(SOX12),ENSG00…
BP	GO:0065009	regulation of molecular function	144	57	201	3117	3.33744e-11	3.44063e-09	ENSG00000003436(TFPI),ENSG00000006062(MAP3K14),ENSG00000008323(PLEKHG6),ENSG00000011422(PLAUR),ENSG00000013588(GPRC5A),ENSG00000015568(RGPD5),ENSG00000023445(BIRC3),ENSG00000026103(FAS),ENSG00000027075(PRKCH),ENSG00000034152(MAP2K3),ENSG00000038382(TRIO),ENSG00000047365(ARAP2),ENSG00000049759(NEDD4L),ENSG00000056558(TRAF1),ENSG00000059915(PSD),ENSG00000069399(BCL3),ENSG00000077150(NFKB2),ENSG0000…	ENSG00000002746(HECW1),ENSG00000076826(CAMSAP3),ENSG00000078401(EDN1),ENSG00000082458(DLG3),ENSG00000085741(WNT11),ENSG00000087495(PHACTR3),ENSG00000092529(CAPN3),ENSG00000100246(DNAL4),ENSG00000100292(HMOX1),ENSG00000101224(CDC25B),ENSG00000104901(DKKL1),ENSG00000105649(RAB3A),ENSG00000106018(VIPR2),ENSG00000108370(RGS9),ENSG00000115738(ID2),ENSG00000121236(TRIM6),ENSG00000123080(CDKN2C),ENSG000…
BP	GO:0040011	locomotion	94	34	128	1864	9.10974e-09	6.53642e-07	ENSG00000011422(PLAUR),ENSG00000034152(MAP2K3),ENSG00000038382(TRIO),ENSG00000067798(NAV3),ENSG00000074181(NOTCH3),ENSG00000081041(CXCL2),ENSG00000086062(B4GALT1),ENSG00000090339(ICAM1),ENSG00000100625(SIX4),ENSG00000101096(NFATC2),ENSG00000105855(ITGB8),ENSG00000107201(DDX58),ENSG00000108688(CCL7),ENSG00000108691(CCL2),ENSG00000108840(HDAC5),ENSG00000112096(SOD2),ENSG00000112245(PTP4A1),ENSG0000…	ENSG00000076826(CAMSAP3),ENSG00000078401(EDN1),ENSG00000085741(WNT11),ENSG00000099617(EFNA2),ENSG00000100078(PLA2G3),ENSG00000100292(HMOX1),ENSG00000111087(GLI1),ENSG00000125378(BMP4),ENSG00000129474(AJUBA),ENSG00000131711(MAP1B),ENSG00000134215(VAV3),ENSG00000137872(SEMA6D),ENSG00000141622(RNF165),ENSG00000144724(PTPRG),ENSG00000152705(CATSPER3),ENSG00000163485(ADORA1),ENSG00000164362(TERT),ENSG…
BP	GO:0007275	multicellular organism development	212	124	336	5528	1.3973e-16	3.55385e-13	ENSG00000006327(TNFRSF12A),ENSG00000006459(KDM7A),ENSG00000008513(ST3GAL1),ENSG00000027075(PRKCH),ENSG00000027697(IFNGR1),ENSG00000038382(TRIO),ENSG00000049759(NEDD4L),ENSG00000057468(MSH4),ENSG00000057657(PRDM1),ENSG00000059915(PSD),ENSG00000064270(ATP2C2),ENSG00000067798(NAV3),ENSG00000069399(BCL3),ENSG00000074181(NOTCH3),ENSG00000075426(FOSL2),ENSG00000077150(NFKB2),ENSG00000077238(IL4R),ENSG0…	ENSG00000002746(HECW1),ENSG00000005102(MEOX1),ENSG00000049192(ADAMTS6),ENSG00000064195(DLX3),ENSG00000069812(HES2),ENSG00000072195(SPEG),ENSG00000076826(CAMSAP3),ENSG00000078401(EDN1),ENSG00000080293(SCTR),ENSG00000080854(IGSF9B),ENSG00000085741(WNT11),ENSG00000088305(DNMT3B),ENSG00000092529(CAPN3),ENSG00000099617(EFNA2),ENSG00000099875(MKNK2),ENSG00000100078(PLA2G3),ENSG00000100292(HMOX1),ENSG00…
BP	GO:0048646	anatomical structure formation involved in morphogenesis	74	33	107	1103	1.58495e-16	3.55385e-13	ENSG00000006327(TNFRSF12A),ENSG00000069399(BCL3),ENSG00000077150(NFKB2),ENSG00000077238(IL4R),ENSG00000086062(B4GALT1),ENSG00000100060(MFNG),ENSG00000100625(SIX4),ENSG00000101096(NFATC2),ENSG00000102554(KLF5),ENSG00000105855(ITGB8),ENSG00000107338(SHB),ENSG00000107984(DKK1),ENSG00000108691(CCL2),ENSG00000108840(HDAC5),ENSG00000115008(IL1A),ENSG00000116016(EPAS1),ENSG00000118503(TNFAIP3),ENSG00000…	ENSG00000005102(MEOX1),ENSG00000078401(EDN1),ENSG00000085741(WNT11),ENSG00000092529(CAPN3),ENSG00000100078(PLA2G3),ENSG00000100292(HMOX1),ENSG00000105672(ETV2),ENSG00000105997(HOXA3),ENSG00000106003(LFNG),ENSG00000115596(WNT6),ENSG00000120093(HOXB3),ENSG00000123342(MMP19),ENSG00000125378(BMP4),ENSG00000134215(VAV3),ENSG00000136457(CHAD),ENSG00000138336(TET1),ENSG00000139445(FOXN4),ENSG00000143178…
BP	GO:0048856	anatomical structure development	224	133	357	6023	3.39108e-16	4.82698e-13	ENSG00000006327(TNFRSF12A),ENSG00000006459(KDM7A),ENSG00000008513(ST3GAL1),ENSG00000027075(PRKCH),ENSG00000027697(IFNGR1),ENSG00000038382(TRIO),ENSG00000049759(NEDD4L),ENSG00000057468(MSH4),ENSG00000057657(PRDM1),ENSG00000059915(PSD),ENSG00000064270(ATP2C2),ENSG00000067798(NAV3),ENSG00000069399(BCL3),ENSG00000074181(NOTCH3),ENSG00000075426(FOSL2),ENSG00000077150(NFKB2),ENSG00000077238(IL4R),ENSG0…	ENSG00000002746(HECW1),ENSG00000005102(MEOX1),ENSG00000049192(ADAMTS6),ENSG00000064195(DLX3),ENSG00000069812(HES2),ENSG00000072195(SPEG),ENSG00000076826(CAMSAP3),ENSG00000078401(EDN1),ENSG00000080293(SCTR),ENSG00000080854(IGSF9B),ENSG00000082458(DLG3),ENSG00000085741(WNT11),ENSG00000088305(DNMT3B),ENSG00000092529(CAPN3),ENSG00000099260(PALMD),ENSG00000099617(EFNA2),ENSG00000099875(MKNK2),ENSG0000…
BP	GO:0009653	anatomical structure morphogenesis	130	67	197	2704	3.76729e-16	4.82698e-13	ENSG00000006327(TNFRSF12A),ENSG00000038382(TRIO),ENSG00000049759(NEDD4L),ENSG00000057657(PRDM1),ENSG00000069399(BCL3),ENSG00000074181(NOTCH3),ENSG00000077150(NFKB2),ENSG00000077238(IL4R),ENSG00000086062(B4GALT1),ENSG00000090339(ICAM1),ENSG00000100060(MFNG),ENSG00000100625(SIX4),ENSG00000100902(PSMA6),ENSG00000101096(NFATC2),ENSG00000102554(KLF5),ENSG00000103196(CRISPLD2),ENSG00000105855(ITGB8),EN…	ENSG00000002746(HECW1),ENSG00000005102(MEOX1),ENSG00000064195(DLX3),ENSG00000076826(CAMSAP3),ENSG00000078401(EDN1),ENSG00000082458(DLG3),ENSG00000085741(WNT11),ENSG00000092529(CAPN3),ENSG00000099260(PALMD),ENSG00000099617(EFNA2),ENSG00000100078(PLA2G3),ENSG00000100292(HMOX1),ENSG00000103528(SYT17),ENSG00000104901(DKKL1),ENSG00000105649(RAB3A),ENSG00000105672(ETV2),ENSG00000105997(HOXA3),ENSG00000…
BP	GO:0009893	positive regulation of metabolic process	181	74	255	3896	1.82025e-15	1.02037e-12	ENSG00000006062(MAP3K14),ENSG00000006459(KDM7A),ENSG00000011422(PLAUR),ENSG00000013588(GPRC5A),ENSG00000020577(SAMD4A),ENSG00000023445(BIRC3),ENSG00000026103(FAS),ENSG00000027697(IFNGR1),ENSG00000034152(MAP2K3),ENSG00000049759(NEDD4L),ENSG00000056558(TRAF1),ENSG00000057657(PRDM1),ENSG00000069399(BCL3),ENSG00000074181(NOTCH3),ENSG00000075426(FOSL2),ENSG00000077150(NFKB2),ENSG00000077238(IL4R),ENSG…	ENSG00000002746(HECW1),ENSG00000005102(MEOX1),ENSG00000006025(OSBPL7),ENSG00000064195(DLX3),ENSG00000078401(EDN1),ENSG00000082458(DLG3),ENSG00000085741(WNT11),ENSG00000088305(DNMT3B),ENSG00000092529(CAPN3),ENSG00000100078(PLA2G3),ENSG00000100292(HMOX1),ENSG00000100302(RASD2),ENSG00000101224(CDC25B),ENSG00000105516(DBP),ENSG00000105672(ETV2),ENSG00000111087(GLI1),ENSG00000114268(PFKFB4),ENSG000001…
BP	GO:0050793	regulation of developmental process	125	68	193	2671	2.00566e-15	1.05816e-12	ENSG00000027075(PRKCH),ENSG00000038382(TRIO),ENSG00000049759(NEDD4L),ENSG00000057657(PRDM1),ENSG00000074181(NOTCH3),ENSG00000077238(IL4R),ENSG00000090339(ICAM1),ENSG00000100625(SIX4),ENSG00000100902(PSMA6),ENSG00000100906(NFKBIA),ENSG00000101096(NFATC2),ENSG00000102554(KLF5),ENSG00000105835(NAMPT),ENSG00000105855(ITGB8),ENSG00000107554(DNMBP),ENSG00000107984(DKK1),ENSG00000108688(CCL7),ENSG000001…	ENSG00000002746(HECW1),ENSG00000069812(HES2),ENSG00000078401(EDN1),ENSG00000085741(WNT11),ENSG00000088305(DNMT3B),ENSG00000092529(CAPN3),ENSG00000099260(PALMD),ENSG00000100078(PLA2G3),ENSG00000100292(HMOX1),ENSG00000103528(SYT17),ENSG00000104901(DKKL1),ENSG00000105672(ETV2),ENSG00000106003(LFNG),ENSG00000111087(GLI1),ENSG00000115596(WNT6),ENSG00000115738(ID2),ENSG00000116990(MYCL),ENSG00000120093…
BP	GO:0010628	positive regulation of gene expression	124	55	179	2425	4.20054e-15	1.98287e-12	ENSG00000006459(KDM7A),ENSG00000020577(SAMD4A),ENSG00000023445(BIRC3),ENSG00000027697(IFNGR1),ENSG00000034152(MAP2K3),ENSG00000057657(PRDM1),ENSG00000069399(BCL3),ENSG00000074181(NOTCH3),ENSG00000075426(FOSL2),ENSG00000077150(NFKB2),ENSG00000077238(IL4R),ENSG00000081985(IL12RB2),ENSG00000087074(PPP1R15A),ENSG00000095752(IL11),ENSG00000095794(CREM),ENSG00000095951(HIVEP1),ENSG00000100003(SEC14L2),…	ENSG00000005102(MEOX1),ENSG00000064195(DLX3),ENSG00000078401(EDN1),ENSG00000085741(WNT11),ENSG00000088305(DNMT3B),ENSG00000092529(CAPN3),ENSG00000100078(PLA2G3),ENSG00000100292(HMOX1),ENSG00000105516(DBP),ENSG00000105672(ETV2),ENSG00000111087(GLI1),ENSG00000115596(WNT6),ENSG00000115738(ID2),ENSG00000116128(BCL9),ENSG00000120075(HOXB5),ENSG00000120093(HOXB3),ENSG00000121236(TRIM6),ENSG00000123405(…
BP	GO:0048522	positive regulation of cellular process	225	111	336	5651	4.56124e-15	2.04549e-12	ENSG00000006062(MAP3K14),ENSG00000006327(TNFRSF12A),ENSG00000006459(KDM7A),ENSG00000011422(PLAUR),ENSG00000013588(GPRC5A),ENSG00000020577(SAMD4A),ENSG00000023445(BIRC3),ENSG00000026103(FAS),ENSG00000027075(PRKCH),ENSG00000027697(IFNGR1),ENSG00000034152(MAP2K3),ENSG00000038382(TRIO),ENSG00000049759(NEDD4L),ENSG00000056558(TRAF1),ENSG00000067798(NAV3),ENSG00000069399(BCL3),ENSG00000074181(NOTCH3),E…	ENSG00000001460(STPG1),ENSG00000005102(MEOX1),ENSG00000006025(OSBPL7),ENSG00000064195(DLX3),ENSG00000078401(EDN1),ENSG00000080293(SCTR),ENSG00000082458(DLG3),ENSG00000085741(WNT11),ENSG00000088305(DNMT3B),ENSG00000092529(CAPN3),ENSG00000100078(PLA2G3),ENSG00000100292(HMOX1),ENSG00000100302(RASD2),ENSG00000101224(CDC25B),ENSG00000103528(SYT17),ENSG00000104081(BMF),ENSG00000104901(DKKL1),ENSG000001…
BP	GO:0035295	tube development	68	28	96	1047	2.25964e-13	4.22224e-11	ENSG00000006327(TNFRSF12A),ENSG00000057657(PRDM1),ENSG00000086062(B4GALT1),ENSG00000100625(SIX4),ENSG00000100918(REC8),ENSG00000102554(KLF5),ENSG00000103196(CRISPLD2),ENSG00000105855(ITGB8),ENSG00000107338(SHB),ENSG00000108691(CCL2),ENSG00000108840(HDAC5),ENSG00000109321(AREG),ENSG00000115008(IL1A),ENSG00000115461(IGFBP5),ENSG00000116016(EPAS1),ENSG00000116285(ERRFI1),ENSG00000118503(TNFAIP3),ENS…	ENSG00000078401(EDN1),ENSG00000085741(WNT11),ENSG00000100292(HMOX1),ENSG00000105649(RAB3A),ENSG00000105672(ETV2),ENSG00000105997(HOXA3),ENSG00000111087(GLI1),ENSG00000115596(WNT6),ENSG00000115738(ID2),ENSG00000120093(HOXB3),ENSG00000123342(MMP19),ENSG00000125378(BMP4),ENSG00000126351(THRA),ENSG00000134215(VAV3),ENSG00000139445(FOXN4),ENSG00000159184(HOXB13),ENSG00000164362(TERT),ENSG00000164683(H…
BP	GO:0035239	tube morphogenesis	58	25	83	845	2.99374e-13	5.37018e-11	ENSG00000006327(TNFRSF12A),ENSG00000057657(PRDM1),ENSG00000086062(B4GALT1),ENSG00000100625(SIX4),ENSG00000102554(KLF5),ENSG00000105855(ITGB8),ENSG00000107338(SHB),ENSG00000108691(CCL2),ENSG00000108840(HDAC5),ENSG00000109321(AREG),ENSG00000115008(IL1A),ENSG00000116016(EPAS1),ENSG00000118503(TNFAIP3),ENSG00000121039(RDH10),ENSG00000123358(NR4A1),ENSG00000123908(AGO2),ENSG00000124145(SDC4),ENSG00000…	ENSG00000078401(EDN1),ENSG00000085741(WNT11),ENSG00000100292(HMOX1),ENSG00000105672(ETV2),ENSG00000105997(HOXA3),ENSG00000111087(GLI1),ENSG00000115596(WNT6),ENSG00000115738(ID2),ENSG00000120093(HOXB3),ENSG00000123342(MMP19),ENSG00000125378(BMP4),ENSG00000134215(VAV3),ENSG00000139445(FOXN4),ENSG00000159184(HOXB13),ENSG00000164362(TERT),ENSG00000164683(HEY1),ENSG00000164741(DLC1),ENSG00000168874(AT…
BP	GO:0048731	system development	193	113	306	4957	1.40595e-15	8.80423e-13	ENSG00000006327(TNFRSF12A),ENSG00000006459(KDM7A),ENSG00000008513(ST3GAL1),ENSG00000027075(PRKCH),ENSG00000027697(IFNGR1),ENSG00000038382(TRIO),ENSG00000049759(NEDD4L),ENSG00000057468(MSH4),ENSG00000057657(PRDM1),ENSG00000059915(PSD),ENSG00000064270(ATP2C2),ENSG00000067798(NAV3),ENSG00000069399(BCL3),ENSG00000074181(NOTCH3),ENSG00000075426(FOSL2),ENSG00000077150(NFKB2),ENSG00000077238(IL4R),ENSG0…	ENSG00000002746(HECW1),ENSG00000005102(MEOX1),ENSG00000049192(ADAMTS6),ENSG00000064195(DLX3),ENSG00000069812(HES2),ENSG00000072195(SPEG),ENSG00000076826(CAMSAP3),ENSG00000078401(EDN1),ENSG00000080293(SCTR),ENSG00000080854(IGSF9B),ENSG00000085741(WNT11),ENSG00000088305(DNMT3B),ENSG00000092529(CAPN3),ENSG00000099617(EFNA2),ENSG00000099875(MKNK2),ENSG00000100078(PLA2G3),ENSG00000100292(HMOX1),ENSG00…
BP	GO:0001944	vasculature development	56	20	76	717	6.83302e-14	1.61277e-11	ENSG00000006327(TNFRSF12A),ENSG00000057657(PRDM1),ENSG00000086062(B4GALT1),ENSG00000101096(NFATC2),ENSG00000102554(KLF5),ENSG00000104903(LYL1),ENSG00000105855(ITGB8),ENSG00000107338(SHB),ENSG00000107796(ACTA2),ENSG00000108691(CCL2),ENSG00000108840(HDAC5),ENSG00000112096(SOD2),ENSG00000115008(IL1A),ENSG00000116016(EPAS1),ENSG00000116285(ERRFI1),ENSG00000118503(TNFAIP3),ENSG00000120738(EGR1),ENSG00…	ENSG00000049192(ADAMTS6),ENSG00000064195(DLX3),ENSG00000078401(EDN1),ENSG00000085741(WNT11),ENSG00000100292(HMOX1),ENSG00000105672(ETV2),ENSG00000105997(HOXA3),ENSG00000120093(HOXB3),ENSG00000123342(MMP19),ENSG00000125378(BMP4),ENSG00000134215(VAV3),ENSG00000159184(HOXB13),ENSG00000164362(TERT),ENSG00000164683(HEY1),ENSG00000164850(GPER1),ENSG00000171388(APLN),ENSG00000174804(FZD4),ENSG0000018258…
BP	GO:0072358	cardiovascular system development	56	20	76	717	6.83302e-14	1.61277e-11	ENSG00000006327(TNFRSF12A),ENSG00000057657(PRDM1),ENSG00000086062(B4GALT1),ENSG00000101096(NFATC2),ENSG00000102554(KLF5),ENSG00000104903(LYL1),ENSG00000105855(ITGB8),ENSG00000107338(SHB),ENSG00000107796(ACTA2),ENSG00000108691(CCL2),ENSG00000108840(HDAC5),ENSG00000112096(SOD2),ENSG00000115008(IL1A),ENSG00000116016(EPAS1),ENSG00000116285(ERRFI1),ENSG00000118503(TNFAIP3),ENSG00000120738(EGR1),ENSG00…	ENSG00000049192(ADAMTS6),ENSG00000064195(DLX3),ENSG00000078401(EDN1),ENSG00000085741(WNT11),ENSG00000100292(HMOX1),ENSG00000105672(ETV2),ENSG00000105997(HOXA3),ENSG00000120093(HOXB3),ENSG00000123342(MMP19),ENSG00000125378(BMP4),ENSG00000134215(VAV3),ENSG00000159184(HOXB13),ENSG00000164362(TERT),ENSG00000164683(HEY1),ENSG00000164850(GPER1),ENSG00000171388(APLN),ENSG00000174804(FZD4),ENSG0000018258…

## Sheet: 0h_vs_6h
Category	GO.ID	Term	Up	Down	DEG	Total	Pvalue	FDR	Up_Gene	Down_Gene
BP	GO:0045944	positive regulation of transcription by RNA polymerase II	62	22	84	1206	2.48417e-07	1.24632e-05	ENSG00000029153(ARNTL2),ENSG00000069399(BCL3),ENSG00000074181(NOTCH3),ENSG00000075426(FOSL2),ENSG00000077150(NFKB2),ENSG00000095752(IL11),ENSG00000100625(SIX4),ENSG00000100906(NFKBIA),ENSG00000101384(JAG1),ENSG00000101928(MOSPD1),ENSG00000102554(KLF5),ENSG00000105835(NAMPT),ENSG00000108840(HDAC5),ENSG00000109320(NFKB1),ENSG00000116016(EPAS1),ENSG00000118495(PLAGL1),ENSG00000119508(NR4A3),ENSG0000…	ENSG00000009950(MLXIPL),ENSG00000072310(SREBF1),ENSG00000078900(TP73),ENSG00000100146(SOX10),ENSG00000105516(DBP),ENSG00000125378(BMP4),ENSG00000126351(THRA),ENSG00000138336(TET1),ENSG00000139445(FOXN4),ENSG00000145687(SSBP2),ENSG00000160685(ZBTB7B),ENSG00000163884(KLF15),ENSG00000164683(HEY1),ENSG00000164850(GPER1),ENSG00000166407(LMO1),ENSG00000168874(ATOH8),ENSG00000171388(APLN),ENSG0000018274…
BP	GO:0006355	regulation of transcription, DNA-templated	107	68	175	3518	0.000433122	0.0075474	ENSG00000006459(KDM7A),ENSG00000010818(HIVEP2),ENSG00000027075(PRKCH),ENSG00000029153(ARNTL2),ENSG00000034152(MAP2K3),ENSG00000056558(TRAF1),ENSG00000069399(BCL3),ENSG00000073921(PICALM),ENSG00000074181(NOTCH3),ENSG00000075426(FOSL2),ENSG00000077150(NFKB2),ENSG00000090339(ICAM1),ENSG00000095752(IL11),ENSG00000100003(SEC14L2),ENSG00000100625(SIX4),ENSG00000100902(PSMA6),ENSG00000100906(NFKBIA),ENS…	ENSG00000009950(MLXIPL),ENSG00000072310(SREBF1),ENSG00000078900(TP73),ENSG00000099284(MACROH2A2),ENSG00000100146(SOX10),ENSG00000105516(DBP),ENSG00000108813(DLX4),ENSG00000109339(MAPK10),ENSG00000109846(CRYAB),ENSG00000115596(WNT6),ENSG00000115738(ID2),ENSG00000116990(MYCL),ENSG00000117266(CDK18),ENSG00000121236(TRIM6),ENSG00000123405(NFE2),ENSG00000125378(BMP4),ENSG00000126351(THRA),ENSG00000128…
BP	GO:1903508	positive regulation of nucleic acid-templated transcription	72	30	102	1630	1.88855e-06	7.27611e-05	ENSG00000006459(KDM7A),ENSG00000029153(ARNTL2),ENSG00000034152(MAP2K3),ENSG00000069399(BCL3),ENSG00000073921(PICALM),ENSG00000074181(NOTCH3),ENSG00000075426(FOSL2),ENSG00000077150(NFKB2),ENSG00000095752(IL11),ENSG00000100003(SEC14L2),ENSG00000100625(SIX4),ENSG00000100906(NFKBIA),ENSG00000101384(JAG1),ENSG00000101928(MOSPD1),ENSG00000102554(KLF5),ENSG00000105835(NAMPT),ENSG00000107796(ACTA2),ENSG0…	ENSG00000009950(MLXIPL),ENSG00000072310(SREBF1),ENSG00000078900(TP73),ENSG00000100146(SOX10),ENSG00000105516(DBP),ENSG00000115596(WNT6),ENSG00000115738(ID2),ENSG00000123405(NFE2),ENSG00000125378(BMP4),ENSG00000126351(THRA),ENSG00000138336(TET1),ENSG00000139445(FOXN4),ENSG00000143365(RORC),ENSG00000145687(SSBP2),ENSG00000160685(ZBTB7B),ENSG00000163884(KLF15),ENSG00000164683(HEY1),ENSG00000164850(G…
BP	GO:0051254	positive regulation of RNA metabolic process	76	30	106	1723	2.51657e-06	9.30316e-05	ENSG00000006459(KDM7A),ENSG00000029153(ARNTL2),ENSG00000034152(MAP2K3),ENSG00000069399(BCL3),ENSG00000073921(PICALM),ENSG00000074181(NOTCH3),ENSG00000075426(FOSL2),ENSG00000077150(NFKB2),ENSG00000095752(IL11),ENSG00000100003(SEC14L2),ENSG00000100625(SIX4),ENSG00000100906(NFKBIA),ENSG00000101384(JAG1),ENSG00000101928(MOSPD1),ENSG00000102554(KLF5),ENSG00000105835(NAMPT),ENSG00000107796(ACTA2),ENSG0…	ENSG00000009950(MLXIPL),ENSG00000072310(SREBF1),ENSG00000078900(TP73),ENSG00000100146(SOX10),ENSG00000105516(DBP),ENSG00000115596(WNT6),ENSG00000115738(ID2),ENSG00000123405(NFE2),ENSG00000125378(BMP4),ENSG00000126351(THRA),ENSG00000138336(TET1),ENSG00000139445(FOXN4),ENSG00000143365(RORC),ENSG00000145687(SSBP2),ENSG00000160685(ZBTB7B),ENSG00000163884(KLF15),ENSG00000164683(HEY1),ENSG00000164850(G…
BP	GO:0045893	positive regulation of transcription, DNA-templated	72	30	102	1630	1.88855e-06	7.27611e-05	ENSG00000006459(KDM7A),ENSG00000029153(ARNTL2),ENSG00000034152(MAP2K3),ENSG00000069399(BCL3),ENSG00000073921(PICALM),ENSG00000074181(NOTCH3),ENSG00000075426(FOSL2),ENSG00000077150(NFKB2),ENSG00000095752(IL11),ENSG00000100003(SEC14L2),ENSG00000100625(SIX4),ENSG00000100906(NFKBIA),ENSG00000101384(JAG1),ENSG00000101928(MOSPD1),ENSG00000102554(KLF5),ENSG00000105835(NAMPT),ENSG00000107796(ACTA2),ENSG0…	ENSG00000009950(MLXIPL),ENSG00000072310(SREBF1),ENSG00000078900(TP73),ENSG00000100146(SOX10),ENSG00000105516(DBP),ENSG00000115596(WNT6),ENSG00000115738(ID2),ENSG00000123405(NFE2),ENSG00000125378(BMP4),ENSG00000126351(THRA),ENSG00000138336(TET1),ENSG00000139445(FOXN4),ENSG00000143365(RORC),ENSG00000145687(SSBP2),ENSG00000160685(ZBTB7B),ENSG00000163884(KLF15),ENSG00000164683(HEY1),ENSG00000164850(G…
BP	GO:1903506	regulation of nucleic acid-templated transcription	107	68	175	3520	0.000445576	0.00767651	ENSG00000006459(KDM7A),ENSG00000010818(HIVEP2),ENSG00000027075(PRKCH),ENSG00000029153(ARNTL2),ENSG00000034152(MAP2K3),ENSG00000056558(TRAF1),ENSG00000069399(BCL3),ENSG00000073921(PICALM),ENSG00000074181(NOTCH3),ENSG00000075426(FOSL2),ENSG00000077150(NFKB2),ENSG00000090339(ICAM1),ENSG00000095752(IL11),ENSG00000100003(SEC14L2),ENSG00000100625(SIX4),ENSG00000100902(PSMA6),ENSG00000100906(NFKBIA),ENS…	ENSG00000009950(MLXIPL),ENSG00000072310(SREBF1),ENSG00000078900(TP73),ENSG00000099284(MACROH2A2),ENSG00000100146(SOX10),ENSG00000105516(DBP),ENSG00000108813(DLX4),ENSG00000109339(MAPK10),ENSG00000109846(CRYAB),ENSG00000115596(WNT6),ENSG00000115738(ID2),ENSG00000116990(MYCL),ENSG00000117266(CDK18),ENSG00000121236(TRIM6),ENSG00000123405(NFE2),ENSG00000125378(BMP4),ENSG00000126351(THRA),ENSG00000128…
BP	GO:2001141	regulation of RNA biosynthetic process	107	68	175	3525	0.000478158	0.00817614	ENSG00000006459(KDM7A),ENSG00000010818(HIVEP2),ENSG00000027075(PRKCH),ENSG00000029153(ARNTL2),ENSG00000034152(MAP2K3),ENSG00000056558(TRAF1),ENSG00000069399(BCL3),ENSG00000073921(PICALM),ENSG00000074181(NOTCH3),ENSG00000075426(FOSL2),ENSG00000077150(NFKB2),ENSG00000090339(ICAM1),ENSG00000095752(IL11),ENSG00000100003(SEC14L2),ENSG00000100625(SIX4),ENSG00000100902(PSMA6),ENSG00000100906(NFKBIA),ENS…	ENSG00000009950(MLXIPL),ENSG00000072310(SREBF1),ENSG00000078900(TP73),ENSG00000099284(MACROH2A2),ENSG00000100146(SOX10),ENSG00000105516(DBP),ENSG00000108813(DLX4),ENSG00000109339(MAPK10),ENSG00000109846(CRYAB),ENSG00000115596(WNT6),ENSG00000115738(ID2),ENSG00000116990(MYCL),ENSG00000117266(CDK18),ENSG00000121236(TRIM6),ENSG00000123405(NFE2),ENSG00000125378(BMP4),ENSG00000126351(THRA),ENSG00000128…
BP	GO:0009891	positive regulation of biosynthetic process	84	37	121	1997	9.26929e-07	3.90036e-05	ENSG00000006459(KDM7A),ENSG00000020577(SAMD4A),ENSG00000029153(ARNTL2),ENSG00000034152(MAP2K3),ENSG00000069399(BCL3),ENSG00000073921(PICALM),ENSG00000074181(NOTCH3),ENSG00000075426(FOSL2),ENSG00000077150(NFKB2),ENSG00000090339(ICAM1),ENSG00000095752(IL11),ENSG00000100003(SEC14L2),ENSG00000100625(SIX4),ENSG00000100906(NFKBIA),ENSG00000101384(JAG1),ENSG00000101928(MOSPD1),ENSG00000102554(KLF5),ENSG…	ENSG00000009950(MLXIPL),ENSG00000072310(SREBF1),ENSG00000075651(PLD1),ENSG00000078900(TP73),ENSG00000100078(PLA2G3),ENSG00000100146(SOX10),ENSG00000105516(DBP),ENSG00000108984(MAP2K6),ENSG00000113721(PDGFRB),ENSG00000115596(WNT6),ENSG00000115738(ID2),ENSG00000120899(PTK2B),ENSG00000123405(NFE2),ENSG00000125378(BMP4),ENSG00000126351(THRA),ENSG00000135124(P2RX4),ENSG00000138336(TET1),ENSG0000013944…
BP	GO:0007166	cell surface receptor signaling pathway	150	63	213	3026	5.44245e-19	1.9608e-15	ENSG00000004799(PDK4),ENSG00000006327(TNFRSF12A),ENSG00000011422(PLAUR),ENSG00000013588(GPRC5A),ENSG00000023445(BIRC3),ENSG00000026103(FAS),ENSG00000026508(CD44),ENSG00000027075(PRKCH),ENSG00000027697(IFNGR1),ENSG00000049249(TNFRSF9),ENSG00000056558(TRAF1),ENSG00000069399(BCL3),ENSG00000074181(NOTCH3),ENSG00000077238(IL4R),ENSG00000081041(CXCL2),ENSG00000090339(ICAM1),ENSG00000095752(IL11),ENSG00…	ENSG00000002746(HECW1),ENSG00000008735(MAPK8IP2),ENSG00000010319(SEMA3G),ENSG00000065361(ERBB3),ENSG00000072310(SREBF1),ENSG00000080293(SCTR),ENSG00000082458(DLG3),ENSG00000099957(P2RX6),ENSG00000100146(SOX10),ENSG00000106003(LFNG),ENSG00000106018(VIPR2),ENSG00000108370(RGS9),ENSG00000108375(RNF43),ENSG00000109339(MAPK10),ENSG00000111077(TNS2),ENSG00000113721(PDGFRB),ENSG00000115596(WNT6),ENSG000…
BP	GO:0009966	regulation of signal transduction	144	65	209	3195	5.28033e-15	3.21431e-12	ENSG00000006327(TNFRSF12A),ENSG00000011422(PLAUR),ENSG00000013588(GPRC5A),ENSG00000023445(BIRC3),ENSG00000026103(FAS),ENSG00000026508(CD44),ENSG00000027075(PRKCH),ENSG00000027697(IFNGR1),ENSG00000034152(MAP2K3),ENSG00000056558(TRAF1),ENSG00000059915(PSD),ENSG00000069399(BCL3),ENSG00000074181(NOTCH3),ENSG00000080845(DLGAP4),ENSG00000090339(ICAM1),ENSG00000090924(PLEKHG2),ENSG00000095752(IL11),ENSG…	ENSG00000002746(HECW1),ENSG00000008735(MAPK8IP2),ENSG00000065361(ERBB3),ENSG00000078900(TP73),ENSG00000080293(SCTR),ENSG00000082458(DLG3),ENSG00000100146(SOX10),ENSG00000100302(RASD2),ENSG00000104081(BMF),ENSG00000106003(LFNG),ENSG00000108370(RGS9),ENSG00000108375(RNF43),ENSG00000108984(MAP2K6),ENSG00000109339(MAPK10),ENSG00000111077(TNS2),ENSG00000113721(PDGFRB),ENSG00000120899(PTK2B),ENSG000001…
BP	GO:0007154	cell communication	245	123	368	6626	6.55416e-17	1.19692e-13	ENSG00000004799(PDK4),ENSG00000006327(TNFRSF12A),ENSG00000011422(PLAUR),ENSG00000013588(GPRC5A),ENSG00000019186(CYP24A1),ENSG00000023445(BIRC3),ENSG00000026103(FAS),ENSG00000026508(CD44),ENSG00000027075(PRKCH),ENSG00000027697(IFNGR1),ENSG00000034152(MAP2K3),ENSG00000049249(TNFRSF9),ENSG00000056558(TRAF1),ENSG00000059915(PSD),ENSG00000069020(MAST4),ENSG00000069399(BCL3),ENSG00000074181(NOTCH3),ENS…	ENSG00000002746(HECW1),ENSG00000008735(MAPK8IP2),ENSG00000009950(MLXIPL),ENSG00000010319(SEMA3G),ENSG00000041515(MYO16),ENSG00000050438(SLC4A8),ENSG00000064205(CCN5),ENSG00000065361(ERBB3),ENSG00000072310(SREBF1),ENSG00000075651(PLD1),ENSG00000078900(TP73),ENSG00000080293(SCTR),ENSG00000082458(DLG3),ENSG00000099957(P2RX6),ENSG00000100078(PLA2G3),ENSG00000100146(SOX10),ENSG00000100302(RASD2),ENSG0…
BP	GO:0023052	signaling	243	123	366	6596	1.07114e-16	1.39722e-13	ENSG00000004799(PDK4),ENSG00000006327(TNFRSF12A),ENSG00000011422(PLAUR),ENSG00000013588(GPRC5A),ENSG00000019186(CYP24A1),ENSG00000023445(BIRC3),ENSG00000026103(FAS),ENSG00000026508(CD44),ENSG00000027075(PRKCH),ENSG00000027697(IFNGR1),ENSG00000034152(MAP2K3),ENSG00000049249(TNFRSF9),ENSG00000056558(TRAF1),ENSG00000059915(PSD),ENSG00000069020(MAST4),ENSG00000069399(BCL3),ENSG00000074181(NOTCH3),ENS…	ENSG00000002746(HECW1),ENSG00000008735(MAPK8IP2),ENSG00000009950(MLXIPL),ENSG00000010319(SEMA3G),ENSG00000041515(MYO16),ENSG00000050438(SLC4A8),ENSG00000064205(CCN5),ENSG00000065361(ERBB3),ENSG00000072310(SREBF1),ENSG00000075651(PLD1),ENSG00000078900(TP73),ENSG00000080293(SCTR),ENSG00000082458(DLG3),ENSG00000099957(P2RX6),ENSG00000100078(PLA2G3),ENSG00000100146(SOX10),ENSG00000100302(RASD2),ENSG0…
BP	GO:0007165	signal transduction	233	112	345	6109	1.58233e-16	1.80603e-13	ENSG00000004799(PDK4),ENSG00000006327(TNFRSF12A),ENSG00000011422(PLAUR),ENSG00000013588(GPRC5A),ENSG00000019186(CYP24A1),ENSG00000023445(BIRC3),ENSG00000026103(FAS),ENSG00000026508(CD44),ENSG00000027075(PRKCH),ENSG00000027697(IFNGR1),ENSG00000034152(MAP2K3),ENSG00000049249(TNFRSF9),ENSG00000056558(TRAF1),ENSG00000059915(PSD),ENSG00000069020(MAST4),ENSG00000069399(BCL3),ENSG00000074181(NOTCH3),ENS…	ENSG00000002746(HECW1),ENSG00000008735(MAPK8IP2),ENSG00000009950(MLXIPL),ENSG00000010319(SEMA3G),ENSG00000041515(MYO16),ENSG00000064205(CCN5),ENSG00000065361(ERBB3),ENSG00000072310(SREBF1),ENSG00000075651(PLD1),ENSG00000078900(TP73),ENSG00000080293(SCTR),ENSG00000082458(DLG3),ENSG00000099957(P2RX6),ENSG00000100146(SOX10),ENSG00000100302(RASD2),ENSG00000102048(ASB9),ENSG00000104081(BMF),ENSG000001…
BP	GO:0035556	intracellular signal transduction	128	63	191	2829	6.30527e-15	3.59834e-12	ENSG00000011422(PLAUR),ENSG00000023445(BIRC3),ENSG00000026103(FAS),ENSG00000026508(CD44),ENSG00000027075(PRKCH),ENSG00000034152(MAP2K3),ENSG00000056558(TRAF1),ENSG00000059915(PSD),ENSG00000069020(MAST4),ENSG00000069399(BCL3),ENSG00000077150(NFKB2),ENSG00000079337(RAPGEF3),ENSG00000090339(ICAM1),ENSG00000090924(PLEKHG2),ENSG00000095752(IL11),ENSG00000100055(CYTH4),ENSG00000100100(PIK3IP1),ENSG0000…	ENSG00000008735(MAPK8IP2),ENSG00000009950(MLXIPL),ENSG00000041515(MYO16),ENSG00000065361(ERBB3),ENSG00000075651(PLD1),ENSG00000078900(TP73),ENSG00000080293(SCTR),ENSG00000082458(DLG3),ENSG00000100302(RASD2),ENSG00000102048(ASB9),ENSG00000104081(BMF),ENSG00000107099(DOCK8),ENSG00000108370(RGS9),ENSG00000108984(MAP2K6),ENSG00000109339(MAPK10),ENSG00000109846(CRYAB),ENSG00000111077(TNS2),ENSG0000011…
BP	GO:0010646	regulation of cell communication	151	74	225	3590	3.30273e-14	1.50786e-11	ENSG00000006327(TNFRSF12A),ENSG00000011422(PLAUR),ENSG00000013588(GPRC5A),ENSG00000023445(BIRC3),ENSG00000026103(FAS),ENSG00000026508(CD44),ENSG00000027075(PRKCH),ENSG00000027697(IFNGR1),ENSG00000034152(MAP2K3),ENSG00000056558(TRAF1),ENSG00000059915(PSD),ENSG00000069399(BCL3),ENSG00000074181(NOTCH3),ENSG00000079337(RAPGEF3),ENSG00000080845(DLGAP4),ENSG00000090339(ICAM1),ENSG00000090924(PLEKHG2),E…	ENSG00000002746(HECW1),ENSG00000008735(MAPK8IP2),ENSG00000050438(SLC4A8),ENSG00000065361(ERBB3),ENSG00000072310(SREBF1),ENSG00000078900(TP73),ENSG00000080293(SCTR),ENSG00000082458(DLG3),ENSG00000100078(PLA2G3),ENSG00000100146(SOX10),ENSG00000100302(RASD2),ENSG00000104081(BMF),ENSG00000105649(RAB3A),ENSG00000106003(LFNG),ENSG00000108370(RGS9),ENSG00000108375(RNF43),ENSG00000108984(MAP2K6),ENSG0000…
BP	GO:0019221	cytokine-mediated signaling pathway	57	11	68	797	1.77678e-09	1.54512e-07	ENSG00000006327(TNFRSF12A),ENSG00000023445(BIRC3),ENSG00000026103(FAS),ENSG00000026508(CD44),ENSG00000027697(IFNGR1),ENSG00000049249(TNFRSF9),ENSG00000056558(TRAF1),ENSG00000077238(IL4R),ENSG00000081041(CXCL2),ENSG00000090339(ICAM1),ENSG00000095752(IL11),ENSG00000100902(PSMA6),ENSG00000100906(NFKBIA),ENSG00000104998(IL27RA),ENSG00000108688(CCL7),ENSG00000108691(CCL2),ENSG00000109320(NFKB1),ENSG00…	ENSG00000120899(PTK2B),ENSG00000121236(TRIM6),ENSG00000127129(EDN2),ENSG00000135114(OASL),ENSG00000137857(DUOX1),ENSG00000143365(RORC),ENSG00000183087(GAS6),ENSG00000183625(CCR3),ENSG00000245848(CEBPA),ENSG00000272398(CD24),ENSG00000278828(H3C10)
BP	GO:0002376	immune system process	138	57	195	3086	1.96357e-12	3.65905e-10	ENSG00000008513(ST3GAL1),ENSG00000008516(MMP25),ENSG00000011422(PLAUR),ENSG00000023445(BIRC3),ENSG00000026103(FAS),ENSG00000026508(CD44),ENSG00000027075(PRKCH),ENSG00000027697(IFNGR1),ENSG00000059804(SLC2A3),ENSG00000065618(COL17A1),ENSG00000069399(BCL3),ENSG00000073921(PICALM),ENSG00000077150(NFKB2),ENSG00000077238(IL4R),ENSG00000079337(RAPGEF3),ENSG00000081041(CXCL2),ENSG00000086062(B4GALT1),EN…	ENSG00000006534(ALDH3B1),ENSG00000008438(PGLYRP1),ENSG00000075651(PLD1),ENSG00000078900(TP73),ENSG00000080293(SCTR),ENSG00000100078(PLA2G3),ENSG00000105514(RAB3D),ENSG00000105649(RAB3A),ENSG00000106003(LFNG),ENSG00000106018(VIPR2),ENSG00000107099(DOCK8),ENSG00000109339(MAPK10),ENSG00000110876(SELPLG),ENSG00000115738(ID2),ENSG00000120899(PTK2B),ENSG00000121236(TRIM6),ENSG00000121281(ADCY7),ENSG000…
BP	GO:0006954	inflammatory response	75	17	92	849	6.44224e-19	1.9608e-15	ENSG00000008516(MMP25),ENSG00000023445(BIRC3),ENSG00000026508(CD44),ENSG00000027697(IFNGR1),ENSG00000034152(MAP2K3),ENSG00000077238(IL4R),ENSG00000081041(CXCL2),ENSG00000086062(B4GALT1),ENSG00000090339(ICAM1),ENSG00000095303(PTGS1),ENSG00000100902(PSMA6),ENSG00000100906(NFKBIA),ENSG00000103175(WFDC1),ENSG00000103313(MEFV),ENSG00000104856(RELB),ENSG00000105499(PLA2G4C),ENSG00000105835(NAMPT),ENSG0…	ENSG00000008438(PGLYRP1),ENSG00000080293(SCTR),ENSG00000100078(PLA2G3),ENSG00000106018(VIPR2),ENSG00000110921(MVK),ENSG00000121281(ADCY7),ENSG00000132965(ALOX5AP),ENSG00000139187(KLRG1),ENSG00000140795(MYLK3),ENSG00000163485(ADORA1),ENSG00000164850(GPER1),ENSG00000165409(TSHR),ENSG00000176046(NUPR1),ENSG00000183625(CCR3),ENSG00000186642(PDE2A),ENSG00000204882(GPR20),ENSG00000245848(CEBPA)
BP	GO:0006952	defense response	104	29	133	1775	1.78728e-13	4.94535e-11	ENSG00000008516(MMP25),ENSG00000023445(BIRC3),ENSG00000026508(CD44),ENSG00000027697(IFNGR1),ENSG00000034152(MAP2K3),ENSG00000069399(BCL3),ENSG00000077238(IL4R),ENSG00000081041(CXCL2),ENSG00000086062(B4GALT1),ENSG00000090339(ICAM1),ENSG00000095303(PTGS1),ENSG00000100902(PSMA6),ENSG00000100906(NFKBIA),ENSG00000103175(WFDC1),ENSG00000103313(MEFV),ENSG00000104856(RELB),ENSG00000104998(IL27RA),ENSG000…	ENSG00000008438(PGLYRP1),ENSG00000008735(MAPK8IP2),ENSG00000080293(SCTR),ENSG00000100078(PLA2G3),ENSG00000106018(VIPR2),ENSG00000110921(MVK),ENSG00000120899(PTK2B),ENSG00000121236(TRIM6),ENSG00000121281(ADCY7),ENSG00000131050(BPIFA2),ENSG00000132965(ALOX5AP),ENSG00000135114(OASL),ENSG00000137857(DUOX1),ENSG00000139187(KLRG1),ENSG00000140795(MYLK3),ENSG00000153029(MR1),ENSG00000162931(TRIM17),ENSG…
BP	GO:0048585	negative regulation of response to stimulus	102	36	138	1798	8.28996e-15	4.45268e-12	ENSG00000003436(TFPI),ENSG00000011422(PLAUR),ENSG00000013588(GPRC5A),ENSG00000026103(FAS),ENSG00000026508(CD44),ENSG00000034152(MAP2K3),ENSG00000069399(BCL3),ENSG00000074181(NOTCH3),ENSG00000077238(IL4R),ENSG00000090339(ICAM1),ENSG00000100100(PIK3IP1),ENSG00000100902(PSMA6),ENSG00000100906(NFKBIA),ENSG00000103175(WFDC1),ENSG00000103313(MEFV),ENSG00000104998(IL27RA),ENSG00000105835(NAMPT),ENSG0000…	ENSG00000002746(HECW1),ENSG00000008438(PGLYRP1),ENSG00000008735(MAPK8IP2),ENSG00000010319(SEMA3G),ENSG00000065361(ERBB3),ENSG00000080293(SCTR),ENSG00000100146(SOX10),ENSG00000106003(LFNG),ENSG00000106018(VIPR2),ENSG00000108370(RGS9),ENSG00000108375(RNF43),ENSG00000110921(MVK),ENSG00000111077(TNS2),ENSG00000121281(ADCY7),ENSG00000125378(BMP4),ENSG00000137872(SEMA6D),ENSG00000138639(ARHGAP24),ENSG0…
BP	GO:0048583	regulation of response to stimulus	191	82	273	4301	9.37264e-19	2.13954e-15	ENSG00000003436(TFPI),ENSG00000006327(TNFRSF12A),ENSG00000011422(PLAUR),ENSG00000013588(GPRC5A),ENSG00000023445(BIRC3),ENSG00000026036(RTEL1-TNFRSF6B),ENSG00000026103(FAS),ENSG00000026508(CD44),ENSG00000027075(PRKCH),ENSG00000027697(IFNGR1),ENSG00000034152(MAP2K3),ENSG00000056558(TRAF1),ENSG00000059915(PSD),ENSG00000065618(COL17A1),ENSG00000069399(BCL3),ENSG00000074181(NOTCH3),ENSG00000077238(IL4…	ENSG00000002746(HECW1),ENSG00000008438(PGLYRP1),ENSG00000008735(MAPK8IP2),ENSG00000010319(SEMA3G),ENSG00000065361(ERBB3),ENSG00000078900(TP73),ENSG00000080293(SCTR),ENSG00000082458(DLG3),ENSG00000100078(PLA2G3),ENSG00000100146(SOX10),ENSG00000100302(RASD2),ENSG00000104081(BMF),ENSG00000105649(RAB3A),ENSG00000106003(LFNG),ENSG00000106018(VIPR2),ENSG00000108370(RGS9),ENSG00000108375(RNF43),ENSG0000…
BP	GO:0050896	response to stimulus	306	153	459	9114	9.31232e-15	4.72393e-12	ENSG00000003436(TFPI),ENSG00000004799(PDK4),ENSG00000006327(TNFRSF12A),ENSG00000008513(ST3GAL1),ENSG00000008516(MMP25),ENSG00000011422(PLAUR),ENSG00000013588(GPRC5A),ENSG00000019186(CYP24A1),ENSG00000023171(GRAMD1B),ENSG00000023445(BIRC3),ENSG00000026036(RTEL1-TNFRSF6B),ENSG00000026103(FAS),ENSG00000026508(CD44),ENSG00000027075(PRKCH),ENSG00000027697(IFNGR1),ENSG00000029153(ARNTL2),ENSG0000003415…	ENSG00000002746(HECW1),ENSG00000006534(ALDH3B1),ENSG00000008438(PGLYRP1),ENSG00000008735(MAPK8IP2),ENSG00000009950(MLXIPL),ENSG00000010319(SEMA3G),ENSG00000041515(MYO16),ENSG00000064205(CCN5),ENSG00000065361(ERBB3),ENSG00000072310(SREBF1),ENSG00000075651(PLD1),ENSG00000078900(TP73),ENSG00000080293(SCTR),ENSG00000082458(DLG3),ENSG00000099957(P2RX6),ENSG00000100078(PLA2G3),ENSG00000100146(SOX10),EN…
BP	GO:0051716	cellular response to stimulus	267	130	397	7552	1.58173e-14	7.60146e-12	ENSG00000003436(TFPI),ENSG00000004799(PDK4),ENSG00000006327(TNFRSF12A),ENSG00000011422(PLAUR),ENSG00000013588(GPRC5A),ENSG00000019186(CYP24A1),ENSG00000023171(GRAMD1B),ENSG00000023445(BIRC3),ENSG00000026036(RTEL1-TNFRSF6B),ENSG00000026103(FAS),ENSG00000026508(CD44),ENSG00000027075(PRKCH),ENSG00000027697(IFNGR1),ENSG00000034152(MAP2K3),ENSG00000049249(TNFRSF9),ENSG00000056558(TRAF1),ENSG0000005991…	ENSG00000002746(HECW1),ENSG00000006534(ALDH3B1),ENSG00000008735(MAPK8IP2),ENSG00000009950(MLXIPL),ENSG00000010319(SEMA3G),ENSG00000041515(MYO16),ENSG00000064205(CCN5),ENSG00000065361(ERBB3),ENSG00000072310(SREBF1),ENSG00000075651(PLD1),ENSG00000078900(TP73),ENSG00000080293(SCTR),ENSG00000082458(DLG3),ENSG00000099957(P2RX6),ENSG00000100146(SOX10),ENSG00000100302(RASD2),ENSG00000102048(ASB9),ENSG00…
BP	GO:0070887	cellular response to chemical stimulus	148	65	213	3351	5.51207e-14	2.3967e-11	ENSG00000003436(TFPI),ENSG00000004799(PDK4),ENSG00000006327(TNFRSF12A),ENSG00000019186(CYP24A1),ENSG00000023171(GRAMD1B),ENSG00000023445(BIRC3),ENSG00000026103(FAS),ENSG00000026508(CD44),ENSG00000027697(IFNGR1),ENSG00000034152(MAP2K3),ENSG00000049249(TNFRSF9),ENSG00000056558(TRAF1),ENSG00000065621(GSTO2),ENSG00000077238(IL4R),ENSG00000079337(RAPGEF3),ENSG00000081041(CXCL2),ENSG00000088826(SMOX),E…	ENSG00000006534(ALDH3B1),ENSG00000009950(MLXIPL),ENSG00000072310(SREBF1),ENSG00000100146(SOX10),ENSG00000103319(EEF2K),ENSG00000107099(DOCK8),ENSG00000108370(RGS9),ENSG00000108602(ALDH3A1),ENSG00000108984(MAP2K6),ENSG00000109339(MAPK10),ENSG00000110876(SELPLG),ENSG00000111077(TNS2),ENSG00000113721(PDGFRB),ENSG00000115596(WNT6),ENSG00000120899(PTK2B),ENSG00000121236(TRIM6),ENSG00000121281(ADCY7),E…
BP	GO:0009605	response to external stimulus	140	52	192	2949	1.87213e-13	5.02777e-11	ENSG00000003436(TFPI),ENSG00000004799(PDK4),ENSG00000011422(PLAUR),ENSG00000019186(CYP24A1),ENSG00000023445(BIRC3),ENSG00000026103(FAS),ENSG00000026508(CD44),ENSG00000027697(IFNGR1),ENSG00000029153(ARNTL2),ENSG00000069399(BCL3),ENSG00000074181(NOTCH3),ENSG00000077150(NFKB2),ENSG00000077238(IL4R),ENSG00000081041(CXCL2),ENSG00000090339(ICAM1),ENSG00000100902(PSMA6),ENSG00000100906(NFKBIA),ENSG00000…	ENSG00000008438(PGLYRP1),ENSG00000010319(SEMA3G),ENSG00000072310(SREBF1),ENSG00000075651(PLD1),ENSG00000080293(SCTR),ENSG00000099957(P2RX6),ENSG00000100078(PLA2G3),ENSG00000106018(VIPR2),ENSG00000108602(ALDH3A1),ENSG00000110921(MVK),ENSG00000113721(PDGFRB),ENSG00000115738(ID2),ENSG00000120899(PTK2B),ENSG00000121236(TRIM6),ENSG00000121281(ADCY7),ENSG00000125378(BMP4),ENSG00000125966(MMP24),ENSG000…
BP	GO:0010033	response to organic substance	147	64	211	3343	1.61499e-13	4.93572e-11	ENSG00000003436(TFPI),ENSG00000004799(PDK4),ENSG00000006327(TNFRSF12A),ENSG00000019186(CYP24A1),ENSG00000023171(GRAMD1B),ENSG00000023445(BIRC3),ENSG00000026103(FAS),ENSG00000026508(CD44),ENSG00000027697(IFNGR1),ENSG00000034152(MAP2K3),ENSG00000049239(H6PD),ENSG00000049249(TNFRSF9),ENSG00000056558(TRAF1),ENSG00000077150(NFKB2),ENSG00000077238(IL4R),ENSG00000079337(RAPGEF3),ENSG00000081041(CXCL2),E…	ENSG00000009950(MLXIPL),ENSG00000072310(SREBF1),ENSG00000078900(TP73),ENSG00000099957(P2RX6),ENSG00000100146(SOX10),ENSG00000103319(EEF2K),ENSG00000107099(DOCK8),ENSG00000108370(RGS9),ENSG00000108602(ALDH3A1),ENSG00000108984(MAP2K6),ENSG00000109846(CRYAB),ENSG00000110876(SELPLG),ENSG00000111077(TNS2),ENSG00000113721(PDGFRB),ENSG00000115596(WNT6),ENSG00000120899(PTK2B),ENSG00000121236(TRIM6),ENSG0…
BP	GO:0050896	response to stimulus	306	153	459	9114	9.31232e-15	4.72393e-12	ENSG00000003436(TFPI),ENSG00000004799(PDK4),ENSG00000006327(TNFRSF12A),ENSG00000008513(ST3GAL1),ENSG00000008516(MMP25),ENSG00000011422(PLAUR),ENSG00000013588(GPRC5A),ENSG00000019186(CYP24A1),ENSG00000023171(GRAMD1B),ENSG00000023445(BIRC3),ENSG00000026036(RTEL1-TNFRSF6B),ENSG00000026103(FAS),ENSG00000026508(CD44),ENSG00000027075(PRKCH),ENSG00000027697(IFNGR1),ENSG00000029153(ARNTL2),ENSG0000003415…	ENSG00000002746(HECW1),ENSG00000006534(ALDH3B1),ENSG00000008438(PGLYRP1),ENSG00000008735(MAPK8IP2),ENSG00000009950(MLXIPL),ENSG00000010319(SEMA3G),ENSG00000041515(MYO16),ENSG00000064205(CCN5),ENSG00000065361(ERBB3),ENSG00000072310(SREBF1),ENSG00000075651(PLD1),ENSG00000078900(TP73),ENSG00000080293(SCTR),ENSG00000082458(DLG3),ENSG00000099957(P2RX6),ENSG00000100078(PLA2G3),ENSG00000100146(SOX10),EN…
BP	GO:0034097	response to cytokine	82	19	101	1200	2.70416e-13	6.67343e-11	ENSG00000003436(TFPI),ENSG00000006327(TNFRSF12A),ENSG00000023445(BIRC3),ENSG00000026103(FAS),ENSG00000026508(CD44),ENSG00000027697(IFNGR1),ENSG00000049249(TNFRSF9),ENSG00000056558(TRAF1),ENSG00000077150(NFKB2),ENSG00000077238(IL4R),ENSG00000081041(CXCL2),ENSG00000090339(ICAM1),ENSG00000095752(IL11),ENSG00000100902(PSMA6),ENSG00000100906(NFKBIA),ENSG00000102554(KLF5),ENSG00000103313(MEFV),ENSG0000…	ENSG00000107099(DOCK8),ENSG00000110876(SELPLG),ENSG00000120899(PTK2B),ENSG00000121236(TRIM6),ENSG00000127129(EDN2),ENSG00000135114(OASL),ENSG00000136378(ADAMTS7),ENSG00000137857(DUOX1),ENSG00000140795(MYLK3),ENSG00000143365(RORC),ENSG00000164850(GPER1),ENSG00000165029(ABCA1),ENSG00000183087(GAS6),ENSG00000183625(CCR3),ENSG00000186642(PDE2A),ENSG00000245848(CEBPA),ENSG00000272398(CD24),ENSG0000027…
BP	GO:0042221	response to chemical	179	83	262	4816	1.15464e-09	1.08691e-07	ENSG00000003436(TFPI),ENSG00000004799(PDK4),ENSG00000006327(TNFRSF12A),ENSG00000011422(PLAUR),ENSG00000019186(CYP24A1),ENSG00000023171(GRAMD1B),ENSG00000023445(BIRC3),ENSG00000026103(FAS),ENSG00000026508(CD44),ENSG00000027697(IFNGR1),ENSG00000034152(MAP2K3),ENSG00000049239(H6PD),ENSG00000049249(TNFRSF9),ENSG00000056558(TRAF1),ENSG00000065621(GSTO2),ENSG00000074181(NOTCH3),ENSG00000077150(NFKB2),E…	ENSG00000006534(ALDH3B1),ENSG00000009950(MLXIPL),ENSG00000010319(SEMA3G),ENSG00000072310(SREBF1),ENSG00000075651(PLD1),ENSG00000078900(TP73),ENSG00000099957(P2RX6),ENSG00000100146(SOX10),ENSG00000103319(EEF2K),ENSG00000104888(SLC17A7),ENSG00000105649(RAB3A),ENSG00000107099(DOCK8),ENSG00000108370(RGS9),ENSG00000108602(ALDH3A1),ENSG00000108984(MAP2K6),ENSG00000109339(MAPK10),ENSG00000109846(CRYAB),…
BP	GO:0071345	cellular response to cytokine stimulus	72	19	91	1112	2.26497e-11	3.13356e-09	ENSG00000003436(TFPI),ENSG00000006327(TNFRSF12A),ENSG00000023445(BIRC3),ENSG00000026103(FAS),ENSG00000026508(CD44),ENSG00000027697(IFNGR1),ENSG00000049249(TNFRSF9),ENSG00000056558(TRAF1),ENSG00000077238(IL4R),ENSG00000081041(CXCL2),ENSG00000090339(ICAM1),ENSG00000095752(IL11),ENSG00000100902(PSMA6),ENSG00000100906(NFKBIA),ENSG00000102554(KLF5),ENSG00000104998(IL27RA),ENSG00000108688(CCL7),ENSG000…	ENSG00000107099(DOCK8),ENSG00000110876(SELPLG),ENSG00000120899(PTK2B),ENSG00000121236(TRIM6),ENSG00000127129(EDN2),ENSG00000135114(OASL),ENSG00000136378(ADAMTS7),ENSG00000137857(DUOX1),ENSG00000140795(MYLK3),ENSG00000143365(RORC),ENSG00000164850(GPER1),ENSG00000165029(ABCA1),ENSG00000183087(GAS6),ENSG00000183625(CCR3),ENSG00000186642(PDE2A),ENSG00000245848(CEBPA),ENSG00000272398(CD24),ENSG0000027…
BP	GO:0071310	cellular response to organic substance	121	57	178	2742	2.74171e-12	4.63604e-10	ENSG00000003436(TFPI),ENSG00000004799(PDK4),ENSG00000006327(TNFRSF12A),ENSG00000019186(CYP24A1),ENSG00000023171(GRAMD1B),ENSG00000023445(BIRC3),ENSG00000026103(FAS),ENSG00000026508(CD44),ENSG00000027697(IFNGR1),ENSG00000034152(MAP2K3),ENSG00000049249(TNFRSF9),ENSG00000056558(TRAF1),ENSG00000077238(IL4R),ENSG00000079337(RAPGEF3),ENSG00000081041(CXCL2),ENSG00000090339(ICAM1),ENSG00000095752(IL11),E…	ENSG00000009950(MLXIPL),ENSG00000072310(SREBF1),ENSG00000100146(SOX10),ENSG00000103319(EEF2K),ENSG00000107099(DOCK8),ENSG00000108370(RGS9),ENSG00000108984(MAP2K6),ENSG00000110876(SELPLG),ENSG00000111077(TNS2),ENSG00000113721(PDGFRB),ENSG00000115596(WNT6),ENSG00000120899(PTK2B),ENSG00000121236(TRIM6),ENSG00000121281(ADCY7),ENSG00000125378(BMP4),ENSG00000126351(THRA),ENSG00000127129(EDN2),ENSG00000…
BP	GO:0001775	cell activation	82	30	112	1419	7.9714e-13	1.65425e-10	ENSG00000008513(ST3GAL1),ENSG00000008516(MMP25),ENSG00000011422(PLAUR),ENSG00000026508(CD44),ENSG00000027075(PRKCH),ENSG00000027697(IFNGR1),ENSG00000059804(SLC2A3),ENSG00000069399(BCL3),ENSG00000077150(NFKB2),ENSG00000077238(IL4R),ENSG00000086062(B4GALT1),ENSG00000090339(ICAM1),ENSG00000095752(IL11),ENSG00000102554(KLF5),ENSG00000103196(CRISPLD2),ENSG00000104856(RELB),ENSG00000104998(IL27RA),ENSG…	ENSG00000006534(ALDH3B1),ENSG00000008438(PGLYRP1),ENSG00000075651(PLD1),ENSG00000100078(PLA2G3),ENSG00000105514(RAB3D),ENSG00000105649(RAB3A),ENSG00000106003(LFNG),ENSG00000107099(DOCK8),ENSG00000110876(SELPLG),ENSG00000113721(PDGFRB),ENSG00000115738(ID2),ENSG00000120899(PTK2B),ENSG00000125378(BMP4),ENSG00000127129(EDN2),ENSG00000129353(SLC44A2),ENSG00000134215(VAV3),ENSG00000135124(P2RX4),ENSG00…
BP	GO:1902680	positive regulation of RNA biosynthetic process	72	30	102	1631	1.94133e-06	7.41687e-05	ENSG00000006459(KDM7A),ENSG00000029153(ARNTL2),ENSG00000034152(MAP2K3),ENSG00000069399(BCL3),ENSG00000073921(PICALM),ENSG00000074181(NOTCH3),ENSG00000075426(FOSL2),ENSG00000077150(NFKB2),ENSG00000095752(IL11),ENSG00000100003(SEC14L2),ENSG00000100625(SIX4),ENSG00000100906(NFKBIA),ENSG00000101384(JAG1),ENSG00000101928(MOSPD1),ENSG00000102554(KLF5),ENSG00000105835(NAMPT),ENSG00000107796(ACTA2),ENSG0…	ENSG00000009950(MLXIPL),ENSG00000072310(SREBF1),ENSG00000078900(TP73),ENSG00000100146(SOX10),ENSG00000105516(DBP),ENSG00000115596(WNT6),ENSG00000115738(ID2),ENSG00000123405(NFE2),ENSG00000125378(BMP4),ENSG00000126351(THRA),ENSG00000138336(TET1),ENSG00000139445(FOXN4),ENSG00000143365(RORC),ENSG00000145687(SSBP2),ENSG00000160685(ZBTB7B),ENSG00000163884(KLF15),ENSG00000164683(HEY1),ENSG00000164850(G…
BP	GO:0042127	regulation of cell population proliferation	94	40	134	1654	3.11482e-16	2.93708e-13	ENSG00000027075(PRKCH),ENSG00000049249(TNFRSF9),ENSG00000075426(FOSL2),ENSG00000077238(IL4R),ENSG00000086062(B4GALT1),ENSG00000090530(P3H2),ENSG00000095303(PTGS1),ENSG00000095752(IL11),ENSG00000100625(SIX4),ENSG00000100906(NFKBIA),ENSG00000101384(JAG1),ENSG00000102554(KLF5),ENSG00000103175(WFDC1),ENSG00000104998(IL27RA),ENSG00000105835(NAMPT),ENSG00000108691(CCL2),ENSG00000109321(AREG),ENSG000001…	ENSG00000009950(MLXIPL),ENSG00000041515(MYO16),ENSG00000065361(ERBB3),ENSG00000078900(TP73),ENSG00000082458(DLG3),ENSG00000100146(SOX10),ENSG00000106018(VIPR2),ENSG00000108602(ALDH3A1),ENSG00000111077(TNS2),ENSG00000113721(PDGFRB),ENSG00000115738(ID2),ENSG00000120899(PTK2B),ENSG00000125378(BMP4),ENSG00000127129(EDN2),ENSG00000134215(VAV3),ENSG00000137440(FGFBP1),ENSG00000138336(TET1),ENSG00000160…
BP	GO:0051239	regulation of multicellular organismal process	159	66	225	3256	3.16272e-19	1.9608e-15	ENSG00000003436(TFPI),ENSG00000004799(PDK4),ENSG00000006047(YBX2),ENSG00000011422(PLAUR),ENSG00000023445(BIRC3),ENSG00000027075(PRKCH),ENSG00000027697(IFNGR1),ENSG00000034152(MAP2K3),ENSG00000067798(NAV3),ENSG00000069399(BCL3),ENSG00000077150(NFKB2),ENSG00000077238(IL4R),ENSG00000079337(RAPGEF3),ENSG00000080845(DLGAP4),ENSG00000090339(ICAM1),ENSG00000100625(SIX4),ENSG00000100902(PSMA6),ENSG000001…	ENSG00000002746(HECW1),ENSG00000008438(PGLYRP1),ENSG00000010319(SEMA3G),ENSG00000072310(SREBF1),ENSG00000078900(TP73),ENSG00000099284(MACROH2A2),ENSG00000100078(PLA2G3),ENSG00000100146(SOX10),ENSG00000103319(EEF2K),ENSG00000106003(LFNG),ENSG00000108984(MAP2K6),ENSG00000113721(PDGFRB),ENSG00000115596(WNT6),ENSG00000115738(ID2),ENSG00000116990(MYCL),ENSG00000120899(PTK2B),ENSG00000121236(TRIM6),ENS…
BP	GO:0051240	positive regulation of multicellular organismal process	104	37	141	1812	1.25571e-15	8.81994e-13	ENSG00000006047(YBX2),ENSG00000023445(BIRC3),ENSG00000027075(PRKCH),ENSG00000027697(IFNGR1),ENSG00000034152(MAP2K3),ENSG00000069399(BCL3),ENSG00000077150(NFKB2),ENSG00000077238(IL4R),ENSG00000079337(RAPGEF3),ENSG00000090339(ICAM1),ENSG00000100625(SIX4),ENSG00000101384(JAG1),ENSG00000104998(IL27RA),ENSG00000105855(ITGB8),ENSG00000107984(DKK1),ENSG00000108960(MMD),ENSG00000109320(NFKB1),ENSG0000011…	ENSG00000078900(TP73),ENSG00000099284(MACROH2A2),ENSG00000100078(PLA2G3),ENSG00000100146(SOX10),ENSG00000103319(EEF2K),ENSG00000113721(PDGFRB),ENSG00000115596(WNT6),ENSG00000115738(ID2),ENSG00000120899(PTK2B),ENSG00000121236(TRIM6),ENSG00000122694(GLIPR2),ENSG00000125378(BMP4),ENSG00000126351(THRA),ENSG00000127129(EDN2),ENSG00000131711(MAP1B),ENSG00000135114(OASL),ENSG00000135124(P2RX4),ENSG00000…
BP	GO:0048518	positive regulation of biological process	237	112	349	6230	3.2166e-16	2.93708e-13	ENSG00000006047(YBX2),ENSG00000006327(TNFRSF12A),ENSG00000006459(KDM7A),ENSG00000011422(PLAUR),ENSG00000013588(GPRC5A),ENSG00000020577(SAMD4A),ENSG00000023445(BIRC3),ENSG00000026103(FAS),ENSG00000026508(CD44),ENSG00000027075(PRKCH),ENSG00000027697(IFNGR1),ENSG00000029153(ARNTL2),ENSG00000034152(MAP2K3),ENSG00000056558(TRAF1),ENSG00000067798(NAV3),ENSG00000069399(BCL3),ENSG00000073921(PICALM),ENSG…	ENSG00000002746(HECW1),ENSG00000008735(MAPK8IP2),ENSG00000009950(MLXIPL),ENSG00000010319(SEMA3G),ENSG00000050438(SLC4A8),ENSG00000065361(ERBB3),ENSG00000072310(SREBF1),ENSG00000075651(PLD1),ENSG00000078900(TP73),ENSG00000080293(SCTR),ENSG00000082458(DLG3),ENSG00000099284(MACROH2A2),ENSG00000100078(PLA2G3),ENSG00000100146(SOX10),ENSG00000100302(RASD2),ENSG00000102048(ASB9),ENSG00000103319(EEF2K),E…
BP	GO:0008283	cell population proliferation	104	45	149	1937	4.16424e-16	3.4214e-13	ENSG00000027075(PRKCH),ENSG00000049249(TNFRSF9),ENSG00000075426(FOSL2),ENSG00000077238(IL4R),ENSG00000086062(B4GALT1),ENSG00000090530(P3H2),ENSG00000095303(PTGS1),ENSG00000095752(IL11),ENSG00000100625(SIX4),ENSG00000100906(NFKBIA),ENSG00000101384(JAG1),ENSG00000102554(KLF5),ENSG00000103175(WFDC1),ENSG00000104998(IL27RA),ENSG00000105835(NAMPT),ENSG00000108691(CCL2),ENSG00000109321(AREG),ENSG000001…	ENSG00000009950(MLXIPL),ENSG00000041515(MYO16),ENSG00000065361(ERBB3),ENSG00000078900(TP73),ENSG00000082458(DLG3),ENSG00000100146(SOX10),ENSG00000106018(VIPR2),ENSG00000107099(DOCK8),ENSG00000108375(RNF43),ENSG00000108602(ALDH3A1),ENSG00000111077(TNS2),ENSG00000113721(PDGFRB),ENSG00000115738(ID2),ENSG00000120899(PTK2B),ENSG00000125378(BMP4),ENSG00000127129(EDN2),ENSG00000134215(VAV3),ENSG00000137…
BP	GO:0007155	cell adhesion	87	27	114	1472	1.66874e-12	3.24197e-10	ENSG00000006327(TNFRSF12A),ENSG00000011422(PLAUR),ENSG00000026508(CD44),ENSG00000065618(COL17A1),ENSG00000077238(IL4R),ENSG00000086062(B4GALT1),ENSG00000090339(ICAM1),ENSG00000101384(JAG1),ENSG00000102531(FNDC3A),ENSG00000103647(CORO2B),ENSG00000104998(IL27RA),ENSG00000105855(ITGB8),ENSG00000108691(CCL2),ENSG00000111859(NEDD9),ENSG00000112149(CD83),ENSG00000112299(VNN1),ENSG00000116106(EPHA4),ENS…	ENSG00000064205(CCN5),ENSG00000065361(ERBB3),ENSG00000080854(IGSF9B),ENSG00000082458(DLG3),ENSG00000106823(ECM2),ENSG00000107099(DOCK8),ENSG00000110876(SELPLG),ENSG00000120899(PTK2B),ENSG00000125378(BMP4),ENSG00000125966(MMP24),ENSG00000134215(VAV3),ENSG00000144810(COL8A1),ENSG00000160685(ZBTB7B),ENSG00000160963(COL26A1),ENSG00000162733(DDR2),ENSG00000162849(KIF26B),ENSG00000164741(DLC1),ENSG0000…
BP	GO:0022610	biological adhesion	87	28	115	1479	1.00276e-12	2.03472e-10	ENSG00000006327(TNFRSF12A),ENSG00000011422(PLAUR),ENSG00000026508(CD44),ENSG00000065618(COL17A1),ENSG00000077238(IL4R),ENSG00000086062(B4GALT1),ENSG00000090339(ICAM1),ENSG00000101384(JAG1),ENSG00000102531(FNDC3A),ENSG00000103647(CORO2B),ENSG00000104998(IL27RA),ENSG00000105855(ITGB8),ENSG00000108691(CCL2),ENSG00000111859(NEDD9),ENSG00000112149(CD83),ENSG00000112299(VNN1),ENSG00000116106(EPHA4),ENS…	ENSG00000064205(CCN5),ENSG00000065361(ERBB3),ENSG00000080854(IGSF9B),ENSG00000082458(DLG3),ENSG00000106823(ECM2),ENSG00000107099(DOCK8),ENSG00000110876(SELPLG),ENSG00000120899(PTK2B),ENSG00000125378(BMP4),ENSG00000125966(MMP24),ENSG00000134215(VAV3),ENSG00000144810(COL8A1),ENSG00000160685(ZBTB7B),ENSG00000160963(COL26A1),ENSG00000162733(DDR2),ENSG00000162849(KIF26B),ENSG00000164741(DLC1),ENSG0000…
BP	GO:0065009	regulation of molecular function	137	62	199	3117	3.78015e-13	8.62914e-11	ENSG00000003436(TFPI),ENSG00000011422(PLAUR),ENSG00000013588(GPRC5A),ENSG00000023445(BIRC3),ENSG00000026103(FAS),ENSG00000026508(CD44),ENSG00000027075(PRKCH),ENSG00000034152(MAP2K3),ENSG00000053524(MCF2L2),ENSG00000056558(TRAF1),ENSG00000059915(PSD),ENSG00000069399(BCL3),ENSG00000073921(PICALM),ENSG00000077150(NFKB2),ENSG00000079337(RAPGEF3),ENSG00000080845(DLGAP4),ENSG00000090339(ICAM1),ENSG0000…	ENSG00000002746(HECW1),ENSG00000003249(DBNDD1),ENSG00000008735(MAPK8IP2),ENSG00000065361(ERBB3),ENSG00000078900(TP73),ENSG00000082458(DLG3),ENSG00000088280(ASAP3),ENSG00000105649(RAB3A),ENSG00000106018(VIPR2),ENSG00000107099(DOCK8),ENSG00000108370(RGS9),ENSG00000108984(MAP2K6),ENSG00000109339(MAPK10),ENSG00000109846(CRYAB),ENSG00000113721(PDGFRB),ENSG00000115556(PLCD4),ENSG00000115738(ID2),ENSG00…
BP	GO:0040011	locomotion	88	44	132	1864	1.32305e-11	1.91758e-09	ENSG00000011422(PLAUR),ENSG00000026508(CD44),ENSG00000034152(MAP2K3),ENSG00000067798(NAV3),ENSG00000074181(NOTCH3),ENSG00000081041(CXCL2),ENSG00000086062(B4GALT1),ENSG00000090339(ICAM1),ENSG00000100625(SIX4),ENSG00000101384(JAG1),ENSG00000103888(CEMIP),ENSG00000104998(IL27RA),ENSG00000105855(ITGB8),ENSG00000108688(CCL7),ENSG00000108691(CCL2),ENSG00000108840(HDAC5),ENSG00000111859(NEDD9),ENSG00000…	ENSG00000010319(SEMA3G),ENSG00000065361(ERBB3),ENSG00000075651(PLD1),ENSG00000088280(ASAP3),ENSG00000100078(PLA2G3),ENSG00000100146(SOX10),ENSG00000107099(DOCK8),ENSG00000110876(SELPLG),ENSG00000113721(PDGFRB),ENSG00000115423(DNAH6),ENSG00000120899(PTK2B),ENSG00000122694(GLIPR2),ENSG00000125378(BMP4),ENSG00000127129(EDN2),ENSG00000131711(MAP1B),ENSG00000134215(VAV3),ENSG00000135124(P2RX4),ENSG000…
BP	GO:0007275	multicellular organism development	191	118	309	5528	1.64417e-13	4.93572e-11	ENSG00000006327(TNFRSF12A),ENSG00000006459(KDM7A),ENSG00000008513(ST3GAL1),ENSG00000026508(CD44),ENSG00000027075(PRKCH),ENSG00000027697(IFNGR1),ENSG00000059915(PSD),ENSG00000067798(NAV3),ENSG00000069399(BCL3),ENSG00000073921(PICALM),ENSG00000074181(NOTCH3),ENSG00000075426(FOSL2),ENSG00000077150(NFKB2),ENSG00000077238(IL4R),ENSG00000079337(RAPGEF3),ENSG00000086062(B4GALT1),ENSG00000090339(ICAM1),E…	ENSG00000002746(HECW1),ENSG00000007237(GAS7),ENSG00000008438(PGLYRP1),ENSG00000008735(MAPK8IP2),ENSG00000010319(SEMA3G),ENSG00000041515(MYO16),ENSG00000049192(ADAMTS6),ENSG00000065361(ERBB3),ENSG00000072310(SREBF1),ENSG00000077063(CTTNBP2),ENSG00000078900(TP73),ENSG00000080293(SCTR),ENSG00000080854(IGSF9B),ENSG00000092758(COL9A3),ENSG00000099284(MACROH2A2),ENSG00000100078(PLA2G3),ENSG00000100146(…
BP	GO:0048646	anatomical structure formation involved in morphogenesis	73	29	102	1103	4.49641e-16	3.4214e-13	ENSG00000006327(TNFRSF12A),ENSG00000069399(BCL3),ENSG00000077150(NFKB2),ENSG00000077238(IL4R),ENSG00000079337(RAPGEF3),ENSG00000086062(B4GALT1),ENSG00000100625(SIX4),ENSG00000101230(ISM1),ENSG00000101384(JAG1),ENSG00000102554(KLF5),ENSG00000105855(ITGB8),ENSG00000107338(SHB),ENSG00000107984(DKK1),ENSG00000108691(CCL2),ENSG00000108840(HDAC5),ENSG00000116016(EPAS1),ENSG00000116194(ANGPTL1),ENSG0000…	ENSG00000100078(PLA2G3),ENSG00000106003(LFNG),ENSG00000113721(PDGFRB),ENSG00000115596(WNT6),ENSG00000120899(PTK2B),ENSG00000125378(BMP4),ENSG00000134215(VAV3),ENSG00000136457(CHAD),ENSG00000137440(FGFBP1),ENSG00000138336(TET1),ENSG00000138639(ARHGAP24),ENSG00000139445(FOXN4),ENSG00000140795(MYLK3),ENSG00000144810(COL8A1),ENSG00000162849(KIF26B),ENSG00000164683(HEY1),ENSG00000164741(DLC1),ENSG0000…
BP	GO:0048856	anatomical structure development	207	124	331	6023	9.55557e-14	3.6355e-11	ENSG00000006047(YBX2),ENSG00000006327(TNFRSF12A),ENSG00000006459(KDM7A),ENSG00000008513(ST3GAL1),ENSG00000008516(MMP25),ENSG00000026508(CD44),ENSG00000027075(PRKCH),ENSG00000027697(IFNGR1),ENSG00000059915(PSD),ENSG00000065618(COL17A1),ENSG00000067798(NAV3),ENSG00000069399(BCL3),ENSG00000073921(PICALM),ENSG00000074181(NOTCH3),ENSG00000075426(FOSL2),ENSG00000077150(NFKB2),ENSG00000077238(IL4R),ENSG…	ENSG00000002746(HECW1),ENSG00000007237(GAS7),ENSG00000008438(PGLYRP1),ENSG00000008735(MAPK8IP2),ENSG00000009950(MLXIPL),ENSG00000010319(SEMA3G),ENSG00000041515(MYO16),ENSG00000049192(ADAMTS6),ENSG00000065361(ERBB3),ENSG00000072310(SREBF1),ENSG00000077063(CTTNBP2),ENSG00000078900(TP73),ENSG00000080293(SCTR),ENSG00000080854(IGSF9B),ENSG00000082458(DLG3),ENSG00000092758(COL9A3),ENSG00000099260(PALMD…
BP	GO:0009653	anatomical structure morphogenesis	122	58	180	2704	2.00546e-13	5.23196e-11	ENSG00000006327(TNFRSF12A),ENSG00000026508(CD44),ENSG00000069399(BCL3),ENSG00000073921(PICALM),ENSG00000074181(NOTCH3),ENSG00000077150(NFKB2),ENSG00000077238(IL4R),ENSG00000079337(RAPGEF3),ENSG00000086062(B4GALT1),ENSG00000090339(ICAM1),ENSG00000100625(SIX4),ENSG00000100902(PSMA6),ENSG00000101230(ISM1),ENSG00000101384(JAG1),ENSG00000102554(KLF5),ENSG00000103196(CRISPLD2),ENSG00000105855(ITGB8),EN…	ENSG00000002746(HECW1),ENSG00000007237(GAS7),ENSG00000008735(MAPK8IP2),ENSG00000009950(MLXIPL),ENSG00000010319(SEMA3G),ENSG00000041515(MYO16),ENSG00000082458(DLG3),ENSG00000099260(PALMD),ENSG00000100078(PLA2G3),ENSG00000100146(SOX10),ENSG00000103319(EEF2K),ENSG00000105649(RAB3A),ENSG00000106003(LFNG),ENSG00000109846(CRYAB),ENSG00000113721(PDGFRB),ENSG00000115596(WNT6),ENSG00000115738(ID2),ENSG000…
BP	GO:0009893	positive regulation of metabolic process	169	67	236	3896	2.51697e-13	6.384e-11	ENSG00000006047(YBX2),ENSG00000006459(KDM7A),ENSG00000011422(PLAUR),ENSG00000013588(GPRC5A),ENSG00000020577(SAMD4A),ENSG00000023445(BIRC3),ENSG00000026103(FAS),ENSG00000026508(CD44),ENSG00000027697(IFNGR1),ENSG00000029153(ARNTL2),ENSG00000034152(MAP2K3),ENSG00000056558(TRAF1),ENSG00000069399(BCL3),ENSG00000073921(PICALM),ENSG00000074181(NOTCH3),ENSG00000075426(FOSL2),ENSG00000077150(NFKB2),ENSG00…	ENSG00000002746(HECW1),ENSG00000008735(MAPK8IP2),ENSG00000009950(MLXIPL),ENSG00000065361(ERBB3),ENSG00000072310(SREBF1),ENSG00000075651(PLD1),ENSG00000078900(TP73),ENSG00000082458(DLG3),ENSG00000100078(PLA2G3),ENSG00000100146(SOX10),ENSG00000100302(RASD2),ENSG00000102048(ASB9),ENSG00000105516(DBP),ENSG00000108984(MAP2K6),ENSG00000109339(MAPK10),ENSG00000113721(PDGFRB),ENSG00000115596(WNT6),ENSG00…
BP	GO:0050793	regulation of developmental process	118	61	179	2671	1.30126e-13	4.24349e-11	ENSG00000026508(CD44),ENSG00000027075(PRKCH),ENSG00000074181(NOTCH3),ENSG00000077238(IL4R),ENSG00000079337(RAPGEF3),ENSG00000090339(ICAM1),ENSG00000100625(SIX4),ENSG00000100902(PSMA6),ENSG00000100906(NFKBIA),ENSG00000101230(ISM1),ENSG00000101384(JAG1),ENSG00000102554(KLF5),ENSG00000104998(IL27RA),ENSG00000105835(NAMPT),ENSG00000105855(ITGB8),ENSG00000107554(DNMBP),ENSG00000107984(DKK1),ENSG000001…	ENSG00000002746(HECW1),ENSG00000008438(PGLYRP1),ENSG00000010319(SEMA3G),ENSG00000078900(TP73),ENSG00000099260(PALMD),ENSG00000099284(MACROH2A2),ENSG00000100078(PLA2G3),ENSG00000100146(SOX10),ENSG00000103319(EEF2K),ENSG00000106003(LFNG),ENSG00000113721(PDGFRB),ENSG00000115596(WNT6),ENSG00000115738(ID2),ENSG00000116990(MYCL),ENSG00000120899(PTK2B),ENSG00000121236(TRIM6),ENSG00000122694(GLIPR2),ENSG…
BP	GO:0010628	positive regulation of gene expression	109	42	151	2425	4.28404e-09	3.31505e-07	ENSG00000006459(KDM7A),ENSG00000020577(SAMD4A),ENSG00000023445(BIRC3),ENSG00000027697(IFNGR1),ENSG00000029153(ARNTL2),ENSG00000034152(MAP2K3),ENSG00000069399(BCL3),ENSG00000073921(PICALM),ENSG00000074181(NOTCH3),ENSG00000075426(FOSL2),ENSG00000077150(NFKB2),ENSG00000077238(IL4R),ENSG00000095752(IL11),ENSG00000100003(SEC14L2),ENSG00000100625(SIX4),ENSG00000100906(NFKBIA),ENSG00000101384(JAG1),ENSG…	ENSG00000009950(MLXIPL),ENSG00000072310(SREBF1),ENSG00000075651(PLD1),ENSG00000078900(TP73),ENSG00000100078(PLA2G3),ENSG00000100146(SOX10),ENSG00000105516(DBP),ENSG00000115596(WNT6),ENSG00000115738(ID2),ENSG00000120899(PTK2B),ENSG00000121236(TRIM6),ENSG00000123405(NFE2),ENSG00000125378(BMP4),ENSG00000126351(THRA),ENSG00000135114(OASL),ENSG00000138336(TET1),ENSG00000139445(FOXN4),ENSG00000143365(R…
BP	GO:0048522	positive regulation of cellular process	205	103	308	5651	5.78218e-12	8.94865e-10	ENSG00000006327(TNFRSF12A),ENSG00000006459(KDM7A),ENSG00000011422(PLAUR),ENSG00000013588(GPRC5A),ENSG00000020577(SAMD4A),ENSG00000023445(BIRC3),ENSG00000026103(FAS),ENSG00000026508(CD44),ENSG00000027075(PRKCH),ENSG00000027697(IFNGR1),ENSG00000029153(ARNTL2),ENSG00000034152(MAP2K3),ENSG00000056558(TRAF1),ENSG00000067798(NAV3),ENSG00000069399(BCL3),ENSG00000073921(PICALM),ENSG00000074181(NOTCH3),EN…	ENSG00000008735(MAPK8IP2),ENSG00000009950(MLXIPL),ENSG00000010319(SEMA3G),ENSG00000050438(SLC4A8),ENSG00000065361(ERBB3),ENSG00000072310(SREBF1),ENSG00000075651(PLD1),ENSG00000078900(TP73),ENSG00000080293(SCTR),ENSG00000082458(DLG3),ENSG00000099284(MACROH2A2),ENSG00000100078(PLA2G3),ENSG00000100146(SOX10),ENSG00000100302(RASD2),ENSG00000103319(EEF2K),ENSG00000104081(BMF),ENSG00000105514(RAB3D),EN…
BP	GO:0035295	tube development	68	32	100	1047	1.06558e-16	1.39722e-13	ENSG00000006327(TNFRSF12A),ENSG00000079337(RAPGEF3),ENSG00000086062(B4GALT1),ENSG00000100625(SIX4),ENSG00000101230(ISM1),ENSG00000101384(JAG1),ENSG00000102554(KLF5),ENSG00000103196(CRISPLD2),ENSG00000105855(ITGB8),ENSG00000107338(SHB),ENSG00000108691(CCL2),ENSG00000108840(HDAC5),ENSG00000109321(AREG),ENSG00000116016(EPAS1),ENSG00000116106(EPHA4),ENSG00000116194(ANGPTL1),ENSG00000116285(ERRFI1),EN…	ENSG00000072310(SREBF1),ENSG00000100146(SOX10),ENSG00000105649(RAB3A),ENSG00000113721(PDGFRB),ENSG00000115596(WNT6),ENSG00000115738(ID2),ENSG00000120899(PTK2B),ENSG00000125378(BMP4),ENSG00000126351(THRA),ENSG00000127129(EDN2),ENSG00000134215(VAV3),ENSG00000137440(FGFBP1),ENSG00000138639(ARHGAP24),ENSG00000139445(FOXN4),ENSG00000144810(COL8A1),ENSG00000146021(KLHL3),ENSG00000162849(KIF26B),ENSG000…
BP	GO:0035239	tube morphogenesis	59	26	85	845	1.4176e-15	9.24581e-13	ENSG00000006327(TNFRSF12A),ENSG00000079337(RAPGEF3),ENSG00000086062(B4GALT1),ENSG00000100625(SIX4),ENSG00000101230(ISM1),ENSG00000101384(JAG1),ENSG00000102554(KLF5),ENSG00000105855(ITGB8),ENSG00000107338(SHB),ENSG00000108691(CCL2),ENSG00000108840(HDAC5),ENSG00000109321(AREG),ENSG00000116016(EPAS1),ENSG00000116106(EPHA4),ENSG00000116194(ANGPTL1),ENSG00000118503(TNFAIP3),ENSG00000118523(CCN2),ENSG0…	ENSG00000100146(SOX10),ENSG00000113721(PDGFRB),ENSG00000115596(WNT6),ENSG00000115738(ID2),ENSG00000120899(PTK2B),ENSG00000125378(BMP4),ENSG00000134215(VAV3),ENSG00000137440(FGFBP1),ENSG00000138639(ARHGAP24),ENSG00000139445(FOXN4),ENSG00000144810(COL8A1),ENSG00000146021(KLHL3),ENSG00000162849(KIF26B),ENSG00000164683(HEY1),ENSG00000164741(DLC1),ENSG00000167642(SPINT2),ENSG00000168874(ATOH8),ENSG000…
BP	GO:0048731	system development	176	109	285	4957	1.03141e-13	3.7671e-11	ENSG00000006327(TNFRSF12A),ENSG00000006459(KDM7A),ENSG00000008513(ST3GAL1),ENSG00000026508(CD44),ENSG00000027075(PRKCH),ENSG00000027697(IFNGR1),ENSG00000059915(PSD),ENSG00000067798(NAV3),ENSG00000069399(BCL3),ENSG00000073921(PICALM),ENSG00000074181(NOTCH3),ENSG00000075426(FOSL2),ENSG00000077150(NFKB2),ENSG00000077238(IL4R),ENSG00000079337(RAPGEF3),ENSG00000086062(B4GALT1),ENSG00000090339(ICAM1),E…	ENSG00000002746(HECW1),ENSG00000007237(GAS7),ENSG00000008438(PGLYRP1),ENSG00000008735(MAPK8IP2),ENSG00000010319(SEMA3G),ENSG00000041515(MYO16),ENSG00000049192(ADAMTS6),ENSG00000065361(ERBB3),ENSG00000072310(SREBF1),ENSG00000077063(CTTNBP2),ENSG00000078900(TP73),ENSG00000080293(SCTR),ENSG00000080854(IGSF9B),ENSG00000092758(COL9A3),ENSG00000099284(MACROH2A2),ENSG00000100078(PLA2G3),ENSG00000100146(…
BP	GO:0001944	vasculature development	56	17	73	717	9.43633e-14	3.6355e-11	ENSG00000006327(TNFRSF12A),ENSG00000079337(RAPGEF3),ENSG00000086062(B4GALT1),ENSG00000101230(ISM1),ENSG00000101384(JAG1),ENSG00000102554(KLF5),ENSG00000105855(ITGB8),ENSG00000107338(SHB),ENSG00000107796(ACTA2),ENSG00000108691(CCL2),ENSG00000108840(HDAC5),ENSG00000112096(SOD2),ENSG00000116016(EPAS1),ENSG00000116194(ANGPTL1),ENSG00000116285(ERRFI1),ENSG00000118503(TNFAIP3),ENSG00000118523(CCN2),ENS…	ENSG00000049192(ADAMTS6),ENSG00000113721(PDGFRB),ENSG00000120899(PTK2B),ENSG00000125378(BMP4),ENSG00000134215(VAV3),ENSG00000137440(FGFBP1),ENSG00000138639(ARHGAP24),ENSG00000144810(COL8A1),ENSG00000164683(HEY1),ENSG00000164850(GPER1),ENSG00000171388(APLN),ENSG00000173269(MMRN2),ENSG00000182580(EPHB3),ENSG00000183625(CCR3),ENSG00000186642(PDE2A),ENSG00000240583(AQP1),ENSG00000260001(TGFBR3L)
BP	GO:0072358	cardiovascular system development	56	17	73	717	9.43633e-14	3.6355e-11	ENSG00000006327(TNFRSF12A),ENSG00000079337(RAPGEF3),ENSG00000086062(B4GALT1),ENSG00000101230(ISM1),ENSG00000101384(JAG1),ENSG00000102554(KLF5),ENSG00000105855(ITGB8),ENSG00000107338(SHB),ENSG00000107796(ACTA2),ENSG00000108691(CCL2),ENSG00000108840(HDAC5),ENSG00000112096(SOD2),ENSG00000116016(EPAS1),ENSG00000116194(ANGPTL1),ENSG00000116285(ERRFI1),ENSG00000118503(TNFAIP3),ENSG00000118523(CCN2),ENS…	ENSG00000049192(ADAMTS6),ENSG00000113721(PDGFRB),ENSG00000120899(PTK2B),ENSG00000125378(BMP4),ENSG00000134215(VAV3),ENSG00000137440(FGFBP1),ENSG00000138639(ARHGAP24),ENSG00000144810(COL8A1),ENSG00000164683(HEY1),ENSG00000164850(GPER1),ENSG00000171388(APLN),ENSG00000173269(MMRN2),ENSG00000182580(EPHB3),ENSG00000183625(CCR3),ENSG00000186642(PDE2A),ENSG00000240583(AQP1),ENSG00000260001(TGFBR3L)

## Sheet: 0h_vs_12h
Category	GO.ID	Term	Up	Down	DEG	Total	Pvalue	FDR	Up_Gene	Down_Gene
BP	GO:0045944	positive regulation of transcription by RNA polymerase II	41	8	49	1206	0.00625682	0.0567219	ENSG00000069399(BCL3),ENSG00000074181(NOTCH3),ENSG00000077150(NFKB2),ENSG00000095752(IL11),ENSG00000100906(NFKBIA),ENSG00000101928(MOSPD1),ENSG00000108840(HDAC5),ENSG00000115008(IL1A),ENSG00000116017(ARID3A),ENSG00000120738(EGR1),ENSG00000122877(EGR2),ENSG00000123358(NR4A1),ENSG00000125740(FOSB),ENSG00000128342(LIF),ENSG00000130024(PHF10),ENSG00000135346(CGA),ENSG00000135363(LMO2),ENSG00000136244…	ENSG00000078401(EDN1),ENSG00000078900(TP73),ENSG00000105516(DBP),ENSG00000132522(GPS2),ENSG00000141510(TP53),ENSG00000164850(GPER1),ENSG00000166407(LMO1),ENSG00000198353(HOXC4)
BP	GO:0006355	regulation of transcription, DNA-templated	82	22	104	3518	0.306684	0.483493	ENSG00000006459(KDM7A),ENSG00000010030(ETV7),ENSG00000010818(HIVEP2),ENSG00000056558(TRAF1),ENSG00000057657(PRDM1),ENSG00000069399(BCL3),ENSG00000074181(NOTCH3),ENSG00000077150(NFKB2),ENSG00000090339(ICAM1),ENSG00000095752(IL11),ENSG00000100906(NFKBIA),ENSG00000101928(MOSPD1),ENSG00000104856(RELB),ENSG00000105991(HOXA1),ENSG00000106799(TGFBR1),ENSG00000107159(CA9),ENSG00000107984(DKK1),ENSG000001…	ENSG00000078401(EDN1),ENSG00000078900(TP73),ENSG00000092529(CAPN3),ENSG00000105516(DBP),ENSG00000105974(CAV1),ENSG00000109846(CRYAB),ENSG00000115596(WNT6),ENSG00000115738(ID2),ENSG00000132326(PER2),ENSG00000132522(GPS2),ENSG00000141510(TP53),ENSG00000143365(RORC),ENSG00000159915(ZNF233),ENSG00000164850(GPER1),ENSG00000165887(ANKRD2),ENSG00000166407(LMO1),ENSG00000182621(PLCB1),ENSG00000184489(PTP…
BP	GO:1903508	positive regulation of nucleic acid-templated transcription	49	14	63	1630	0.00614528	0.0561305	ENSG00000006459(KDM7A),ENSG00000069399(BCL3),ENSG00000074181(NOTCH3),ENSG00000077150(NFKB2),ENSG00000095752(IL11),ENSG00000100906(NFKBIA),ENSG00000101928(MOSPD1),ENSG00000106799(TGFBR1),ENSG00000108840(HDAC5),ENSG00000110330(BIRC2),ENSG00000115008(IL1A),ENSG00000116017(ARID3A),ENSG00000120738(EGR1),ENSG00000122877(EGR2),ENSG00000123358(NR4A1),ENSG00000125740(FOSB),ENSG00000128342(LIF),ENSG0000012…	ENSG00000078401(EDN1),ENSG00000078900(TP73),ENSG00000092529(CAPN3),ENSG00000105516(DBP),ENSG00000115596(WNT6),ENSG00000115738(ID2),ENSG00000132326(PER2),ENSG00000132522(GPS2),ENSG00000141510(TP53),ENSG00000143365(RORC),ENSG00000164850(GPER1),ENSG00000166407(LMO1),ENSG00000182621(PLCB1),ENSG00000198353(HOXC4)
BP	GO:0051254	positive regulation of RNA metabolic process	52	14	66	1723	0.00617764	0.0562378	ENSG00000006459(KDM7A),ENSG00000069399(BCL3),ENSG00000074181(NOTCH3),ENSG00000077150(NFKB2),ENSG00000095752(IL11),ENSG00000100906(NFKBIA),ENSG00000101928(MOSPD1),ENSG00000106799(TGFBR1),ENSG00000108840(HDAC5),ENSG00000110330(BIRC2),ENSG00000115008(IL1A),ENSG00000116017(ARID3A),ENSG00000120738(EGR1),ENSG00000122877(EGR2),ENSG00000123358(NR4A1),ENSG00000125740(FOSB),ENSG00000128016(ZFP36),ENSG00000…	ENSG00000078401(EDN1),ENSG00000078900(TP73),ENSG00000092529(CAPN3),ENSG00000105516(DBP),ENSG00000115596(WNT6),ENSG00000115738(ID2),ENSG00000132326(PER2),ENSG00000132522(GPS2),ENSG00000141510(TP53),ENSG00000143365(RORC),ENSG00000164850(GPER1),ENSG00000166407(LMO1),ENSG00000182621(PLCB1),ENSG00000198353(HOXC4)
BP	GO:0045893	positive regulation of transcription, DNA-templated	49	14	63	1630	0.00614528	0.0561305	ENSG00000006459(KDM7A),ENSG00000069399(BCL3),ENSG00000074181(NOTCH3),ENSG00000077150(NFKB2),ENSG00000095752(IL11),ENSG00000100906(NFKBIA),ENSG00000101928(MOSPD1),ENSG00000106799(TGFBR1),ENSG00000108840(HDAC5),ENSG00000110330(BIRC2),ENSG00000115008(IL1A),ENSG00000116017(ARID3A),ENSG00000120738(EGR1),ENSG00000122877(EGR2),ENSG00000123358(NR4A1),ENSG00000125740(FOSB),ENSG00000128342(LIF),ENSG0000012…	ENSG00000078401(EDN1),ENSG00000078900(TP73),ENSG00000092529(CAPN3),ENSG00000105516(DBP),ENSG00000115596(WNT6),ENSG00000115738(ID2),ENSG00000132326(PER2),ENSG00000132522(GPS2),ENSG00000141510(TP53),ENSG00000143365(RORC),ENSG00000164850(GPER1),ENSG00000166407(LMO1),ENSG00000182621(PLCB1),ENSG00000198353(HOXC4)
BP	GO:1903506	regulation of nucleic acid-templated transcription	82	22	104	3520	0.308956	0.483493	ENSG00000006459(KDM7A),ENSG00000010030(ETV7),ENSG00000010818(HIVEP2),ENSG00000056558(TRAF1),ENSG00000057657(PRDM1),ENSG00000069399(BCL3),ENSG00000074181(NOTCH3),ENSG00000077150(NFKB2),ENSG00000090339(ICAM1),ENSG00000095752(IL11),ENSG00000100906(NFKBIA),ENSG00000101928(MOSPD1),ENSG00000104856(RELB),ENSG00000105991(HOXA1),ENSG00000106799(TGFBR1),ENSG00000107159(CA9),ENSG00000107984(DKK1),ENSG000001…	ENSG00000078401(EDN1),ENSG00000078900(TP73),ENSG00000092529(CAPN3),ENSG00000105516(DBP),ENSG00000105974(CAV1),ENSG00000109846(CRYAB),ENSG00000115596(WNT6),ENSG00000115738(ID2),ENSG00000132326(PER2),ENSG00000132522(GPS2),ENSG00000141510(TP53),ENSG00000143365(RORC),ENSG00000159915(ZNF233),ENSG00000164850(GPER1),ENSG00000165887(ANKRD2),ENSG00000166407(LMO1),ENSG00000182621(PLCB1),ENSG00000184489(PTP…
BP	GO:2001141	regulation of RNA biosynthetic process	82	22	104	3525	0.314667	0.487179	ENSG00000006459(KDM7A),ENSG00000010030(ETV7),ENSG00000010818(HIVEP2),ENSG00000056558(TRAF1),ENSG00000057657(PRDM1),ENSG00000069399(BCL3),ENSG00000074181(NOTCH3),ENSG00000077150(NFKB2),ENSG00000090339(ICAM1),ENSG00000095752(IL11),ENSG00000100906(NFKBIA),ENSG00000101928(MOSPD1),ENSG00000104856(RELB),ENSG00000105991(HOXA1),ENSG00000106799(TGFBR1),ENSG00000107159(CA9),ENSG00000107984(DKK1),ENSG000001…	ENSG00000078401(EDN1),ENSG00000078900(TP73),ENSG00000092529(CAPN3),ENSG00000105516(DBP),ENSG00000105974(CAV1),ENSG00000109846(CRYAB),ENSG00000115596(WNT6),ENSG00000115738(ID2),ENSG00000132326(PER2),ENSG00000132522(GPS2),ENSG00000141510(TP53),ENSG00000143365(RORC),ENSG00000159915(ZNF233),ENSG00000164850(GPER1),ENSG00000165887(ANKRD2),ENSG00000166407(LMO1),ENSG00000182621(PLCB1),ENSG00000184489(PTP…
BP	GO:0009891	positive regulation of biosynthetic process	64	17	81	1997	0.000455293	0.00860314	ENSG00000006459(KDM7A),ENSG00000062038(CDH3),ENSG00000069399(BCL3),ENSG00000074181(NOTCH3),ENSG00000077150(NFKB2),ENSG00000090339(ICAM1),ENSG00000095637(SORBS1),ENSG00000095752(IL11),ENSG00000100906(NFKBIA),ENSG00000101928(MOSPD1),ENSG00000106799(TGFBR1),ENSG00000108691(CCL2),ENSG00000108840(HDAC5),ENSG00000110330(BIRC2),ENSG00000112096(SOD2),ENSG00000115008(IL1A),ENSG00000116017(ARID3A),ENSG0000…	ENSG00000078401(EDN1),ENSG00000078900(TP73),ENSG00000092529(CAPN3),ENSG00000105516(DBP),ENSG00000108984(MAP2K6),ENSG00000113721(PDGFRB),ENSG00000115596(WNT6),ENSG00000115738(ID2),ENSG00000120899(PTK2B),ENSG00000132326(PER2),ENSG00000132522(GPS2),ENSG00000141510(TP53),ENSG00000143365(RORC),ENSG00000164850(GPER1),ENSG00000166407(LMO1),ENSG00000182621(PLCB1),ENSG00000198353(HOXC4)
BP	GO:0007166	cell surface receptor signaling pathway	125	28	153	3026	2.72419e-14	2.78684e-11	ENSG00000004799(PDK4),ENSG00000006327(TNFRSF12A),ENSG00000011422(PLAUR),ENSG00000013588(GPRC5A),ENSG00000023445(BIRC3),ENSG00000049249(TNFRSF9),ENSG00000056558(TRAF1),ENSG00000062038(CDH3),ENSG00000069399(BCL3),ENSG00000074181(NOTCH3),ENSG00000077238(IL4R),ENSG00000081041(CXCL2),ENSG00000090339(ICAM1),ENSG00000095637(SORBS1),ENSG00000095752(IL11),ENSG00000100906(NFKBIA),ENSG00000104856(RELB),ENSG…	ENSG00000069696(DRD4),ENSG00000078401(EDN1),ENSG00000105974(CAV1),ENSG00000106018(VIPR2),ENSG00000113721(PDGFRB),ENSG00000115596(WNT6),ENSG00000120899(PTK2B),ENSG00000127129(EDN2),ENSG00000132522(GPS2),ENSG00000134215(VAV3),ENSG00000135253(KCP),ENSG00000137440(FGFBP1),ENSG00000137642(SORL1),ENSG00000141510(TP53),ENSG00000143365(RORC),ENSG00000154096(THY1),ENSG00000155792(DEPTOR),ENSG00000164850(G…
BP	GO:0009966	regulation of signal transduction	119	31	150	3195	2.20812e-11	6.02376e-09	ENSG00000006327(TNFRSF12A),ENSG00000011422(PLAUR),ENSG00000013588(GPRC5A),ENSG00000023445(BIRC3),ENSG00000031081(ARHGAP31),ENSG00000047648(ARHGAP6),ENSG00000056558(TRAF1),ENSG00000057657(PRDM1),ENSG00000062038(CDH3),ENSG00000069399(BCL3),ENSG00000074181(NOTCH3),ENSG00000074416(MGLL),ENSG00000090339(ICAM1),ENSG00000090924(PLEKHG2),ENSG00000095637(SORBS1),ENSG00000095752(IL11),ENSG00000100100(PIK3I…	ENSG00000069696(DRD4),ENSG00000078401(EDN1),ENSG00000078900(TP73),ENSG00000092529(CAPN3),ENSG00000105974(CAV1),ENSG00000108984(MAP2K6),ENSG00000113721(PDGFRB),ENSG00000120899(PTK2B),ENSG00000132522(GPS2),ENSG00000134215(VAV3),ENSG00000135253(KCP),ENSG00000137440(FGFBP1),ENSG00000137642(SORL1),ENSG00000141510(TP53),ENSG00000146376(ARHGAP18),ENSG00000154096(THY1),ENSG00000155792(DEPTOR),ENSG0000016…
BP	GO:0007154	cell communication	216	52	268	6626	4.11063e-14	3.36414e-11	ENSG00000004799(PDK4),ENSG00000006327(TNFRSF12A),ENSG00000011422(PLAUR),ENSG00000013588(GPRC5A),ENSG00000019186(CYP24A1),ENSG00000023445(BIRC3),ENSG00000031081(ARHGAP31),ENSG00000036530(CYP46A1),ENSG00000047648(ARHGAP6),ENSG00000049249(TNFRSF9),ENSG00000056558(TRAF1),ENSG00000057657(PRDM1),ENSG00000062038(CDH3),ENSG00000069020(MAST4),ENSG00000069399(BCL3),ENSG00000074181(NOTCH3),ENSG00000074416(M…	ENSG00000064205(CCN5),ENSG00000069696(DRD4),ENSG00000070748(CHAT),ENSG00000078401(EDN1),ENSG00000078900(TP73),ENSG00000092529(CAPN3),ENSG00000102048(ASB9),ENSG00000105974(CAV1),ENSG00000106018(VIPR2),ENSG00000107099(DOCK8),ENSG00000108984(MAP2K6),ENSG00000109846(CRYAB),ENSG00000113721(PDGFRB),ENSG00000115596(WNT6),ENSG00000120899(PTK2B),ENSG00000127129(EDN2),ENSG00000131711(MAP1B),ENSG00000132326…
BP	GO:0023052	signaling	213	52	265	6596	1.75467e-13	1.04348e-10	ENSG00000004799(PDK4),ENSG00000006327(TNFRSF12A),ENSG00000011422(PLAUR),ENSG00000013588(GPRC5A),ENSG00000019186(CYP24A1),ENSG00000023445(BIRC3),ENSG00000031081(ARHGAP31),ENSG00000036530(CYP46A1),ENSG00000047648(ARHGAP6),ENSG00000049249(TNFRSF9),ENSG00000056558(TRAF1),ENSG00000057657(PRDM1),ENSG00000062038(CDH3),ENSG00000069020(MAST4),ENSG00000069399(BCL3),ENSG00000074181(NOTCH3),ENSG00000074416(M…	ENSG00000064205(CCN5),ENSG00000069696(DRD4),ENSG00000070748(CHAT),ENSG00000078401(EDN1),ENSG00000078900(TP73),ENSG00000092529(CAPN3),ENSG00000102048(ASB9),ENSG00000105974(CAV1),ENSG00000106018(VIPR2),ENSG00000107099(DOCK8),ENSG00000108984(MAP2K6),ENSG00000109846(CRYAB),ENSG00000113721(PDGFRB),ENSG00000115596(WNT6),ENSG00000120899(PTK2B),ENSG00000127129(EDN2),ENSG00000131711(MAP1B),ENSG00000132326…
BP	GO:0007165	signal transduction	202	46	248	6109	9.11147e-13	4.66052e-10	ENSG00000004799(PDK4),ENSG00000006327(TNFRSF12A),ENSG00000011422(PLAUR),ENSG00000013588(GPRC5A),ENSG00000019186(CYP24A1),ENSG00000023445(BIRC3),ENSG00000031081(ARHGAP31),ENSG00000047648(ARHGAP6),ENSG00000049249(TNFRSF9),ENSG00000056558(TRAF1),ENSG00000057657(PRDM1),ENSG00000062038(CDH3),ENSG00000069020(MAST4),ENSG00000069399(BCL3),ENSG00000074181(NOTCH3),ENSG00000074416(MGLL),ENSG00000077150(NFKB…	ENSG00000064205(CCN5),ENSG00000069696(DRD4),ENSG00000078401(EDN1),ENSG00000078900(TP73),ENSG00000092529(CAPN3),ENSG00000102048(ASB9),ENSG00000105974(CAV1),ENSG00000106018(VIPR2),ENSG00000107099(DOCK8),ENSG00000108984(MAP2K6),ENSG00000109846(CRYAB),ENSG00000113721(PDGFRB),ENSG00000115596(WNT6),ENSG00000120899(PTK2B),ENSG00000127129(EDN2),ENSG00000132522(GPS2),ENSG00000134215(VAV3),ENSG00000135253(…
BP	GO:0035556	intracellular signal transduction	109	32	141	2829	1.40908e-12	6.06941e-10	ENSG00000011422(PLAUR),ENSG00000023445(BIRC3),ENSG00000031081(ARHGAP31),ENSG00000047648(ARHGAP6),ENSG00000056558(TRAF1),ENSG00000057657(PRDM1),ENSG00000069020(MAST4),ENSG00000069399(BCL3),ENSG00000077150(NFKB2),ENSG00000079337(RAPGEF3),ENSG00000090339(ICAM1),ENSG00000090924(PLEKHG2),ENSG00000095752(IL11),ENSG00000100100(PIK3IP1),ENSG00000100558(PLEK2),ENSG00000100906(NFKBIA),ENSG00000104856(RELB)…	ENSG00000069696(DRD4),ENSG00000078401(EDN1),ENSG00000078900(TP73),ENSG00000092529(CAPN3),ENSG00000102048(ASB9),ENSG00000105974(CAV1),ENSG00000107099(DOCK8),ENSG00000108984(MAP2K6),ENSG00000109846(CRYAB),ENSG00000113721(PDGFRB),ENSG00000120899(PTK2B),ENSG00000127129(EDN2),ENSG00000132522(GPS2),ENSG00000134215(VAV3),ENSG00000137642(SORL1),ENSG00000141510(TP53),ENSG00000141750(STAC2),ENSG00000146376…
BP	GO:0010646	regulation of cell communication	130	34	164	3590	1.43218e-11	4.34111e-09	ENSG00000006327(TNFRSF12A),ENSG00000011422(PLAUR),ENSG00000013588(GPRC5A),ENSG00000023445(BIRC3),ENSG00000031081(ARHGAP31),ENSG00000036530(CYP46A1),ENSG00000047648(ARHGAP6),ENSG00000056558(TRAF1),ENSG00000057657(PRDM1),ENSG00000062038(CDH3),ENSG00000069399(BCL3),ENSG00000074181(NOTCH3),ENSG00000074416(MGLL),ENSG00000079337(RAPGEF3),ENSG00000090339(ICAM1),ENSG00000090924(PLEKHG2),ENSG00000095637(S…	ENSG00000069696(DRD4),ENSG00000078401(EDN1),ENSG00000078900(TP73),ENSG00000092529(CAPN3),ENSG00000105974(CAV1),ENSG00000108984(MAP2K6),ENSG00000113721(PDGFRB),ENSG00000120899(PTK2B),ENSG00000131711(MAP1B),ENSG00000132326(PER2),ENSG00000132522(GPS2),ENSG00000134215(VAV3),ENSG00000135253(KCP),ENSG00000137440(FGFBP1),ENSG00000137642(SORL1),ENSG00000141510(TP53),ENSG00000146376(ARHGAP18),ENSG00000154…
BP	GO:0019221	cytokine-mediated signaling pathway	52	9	61	797	1.09242e-12	5.25905e-10	ENSG00000006327(TNFRSF12A),ENSG00000023445(BIRC3),ENSG00000049249(TNFRSF9),ENSG00000056558(TRAF1),ENSG00000077238(IL4R),ENSG00000081041(CXCL2),ENSG00000090339(ICAM1),ENSG00000095752(IL11),ENSG00000100906(NFKBIA),ENSG00000105246(EBI3),ENSG00000106089(STX1A),ENSG00000108691(CCL2),ENSG00000110330(BIRC2),ENSG00000112096(SOD2),ENSG00000115008(IL1A),ENSG00000115009(CCL20),ENSG00000115602(IL1RL1),ENSG00…	ENSG00000078401(EDN1),ENSG00000105974(CAV1),ENSG00000120899(PTK2B),ENSG00000127129(EDN2),ENSG00000132522(GPS2),ENSG00000141510(TP53),ENSG00000143365(RORC),ENSG00000182621(PLCB1),ENSG00000272398(CD24)
BP	GO:0002376	immune system process	121	31	152	3086	3.13761e-13	1.71188e-10	ENSG00000011422(PLAUR),ENSG00000023445(BIRC3),ENSG00000057657(PRDM1),ENSG00000059804(SLC2A3),ENSG00000065618(COL17A1),ENSG00000069399(BCL3),ENSG00000077150(NFKB2),ENSG00000077238(IL4R),ENSG00000079337(RAPGEF3),ENSG00000081041(CXCL2),ENSG00000086062(B4GALT1),ENSG00000090339(ICAM1),ENSG00000095752(IL11),ENSG00000100906(NFKBIA),ENSG00000104856(RELB),ENSG00000105246(EBI3),ENSG00000105855(ITGB8),ENSG0…	ENSG00000006534(ALDH3B1),ENSG00000078401(EDN1),ENSG00000078900(TP73),ENSG00000100271(TTLL1),ENSG00000100298(APOBEC3H),ENSG00000105974(CAV1),ENSG00000106018(VIPR2),ENSG00000107099(DOCK8),ENSG00000115705(TPO),ENSG00000115738(ID2),ENSG00000120899(PTK2B),ENSG00000127129(EDN2),ENSG00000131050(BPIFA2),ENSG00000132522(GPS2),ENSG00000134215(VAV3),ENSG00000135253(KCP),ENSG00000139200(PIANP),ENSG0000014151…
BP	GO:0006954	inflammatory response	56	9	65	849	1.78503e-13	1.04348e-10	ENSG00000023445(BIRC3),ENSG00000074416(MGLL),ENSG00000077238(IL4R),ENSG00000081041(CXCL2),ENSG00000086062(B4GALT1),ENSG00000090339(ICAM1),ENSG00000095303(PTGS1),ENSG00000100906(NFKBIA),ENSG00000103175(WFDC1),ENSG00000104856(RELB),ENSG00000108691(CCL2),ENSG00000108840(HDAC5),ENSG00000110330(BIRC2),ENSG00000112299(VNN1),ENSG00000115008(IL1A),ENSG00000115009(CCL20),ENSG00000115602(IL1RL1),ENSG000001…	ENSG00000106018(VIPR2),ENSG00000132522(GPS2),ENSG00000132965(ALOX5AP),ENSG00000140795(MYLK3),ENSG00000164850(GPER1),ENSG00000165409(TSHR),ENSG00000169432(SCN9A),ENSG00000186642(PDE2A),ENSG00000204882(GPR20)
BP	GO:0006952	defense response	83	17	100	1775	7.91717e-12	2.59176e-09	ENSG00000023445(BIRC3),ENSG00000057657(PRDM1),ENSG00000069399(BCL3),ENSG00000074416(MGLL),ENSG00000077238(IL4R),ENSG00000081041(CXCL2),ENSG00000086062(B4GALT1),ENSG00000090339(ICAM1),ENSG00000095303(PTGS1),ENSG00000100906(NFKBIA),ENSG00000103175(WFDC1),ENSG00000104856(RELB),ENSG00000108691(CCL2),ENSG00000108840(HDAC5),ENSG00000110330(BIRC2),ENSG00000112149(CD83),ENSG00000112299(VNN1),ENSG00000115…	ENSG00000069696(DRD4),ENSG00000078401(EDN1),ENSG00000100298(APOBEC3H),ENSG00000106018(VIPR2),ENSG00000120899(PTK2B),ENSG00000131050(BPIFA2),ENSG00000132522(GPS2),ENSG00000132965(ALOX5AP),ENSG00000140795(MYLK3),ENSG00000141510(TP53),ENSG00000162931(TRIM17),ENSG00000164850(GPER1),ENSG00000165409(TSHR),ENSG00000169432(SCN9A),ENSG00000186642(PDE2A),ENSG00000204882(GPR20),ENSG00000276600(RAB7B)
BP	GO:0048585	negative regulation of response to stimulus	79	17	96	1798	4.40424e-10	6.80082e-08	ENSG00000003436(TFPI),ENSG00000011422(PLAUR),ENSG00000013588(GPRC5A),ENSG00000069399(BCL3),ENSG00000074181(NOTCH3),ENSG00000077238(IL4R),ENSG00000090339(ICAM1),ENSG00000100100(PIK3IP1),ENSG00000100906(NFKBIA),ENSG00000103175(WFDC1),ENSG00000106799(TGFBR1),ENSG00000107984(DKK1),ENSG00000108691(CCL2),ENSG00000109321(AREG),ENSG00000112096(SOD2),ENSG00000112299(VNN1),ENSG00000112981(NME5),ENSG0000011…	ENSG00000078401(EDN1),ENSG00000105974(CAV1),ENSG00000106018(VIPR2),ENSG00000132522(GPS2),ENSG00000137642(SORL1),ENSG00000141510(TP53),ENSG00000154096(THY1),ENSG00000155792(DEPTOR),ENSG00000164741(DLC1),ENSG00000164850(GPER1),ENSG00000165409(TSHR),ENSG00000186642(PDE2A),ENSG00000197415(VEPH1),ENSG00000204882(GPR20),ENSG00000235387(SPAAR),ENSG00000242265(PEG10),ENSG00000276600(RAB7B)
BP	GO:0048583	regulation of response to stimulus	156	39	195	4301	7.30067e-14	4.97906e-11	ENSG00000003436(TFPI),ENSG00000006327(TNFRSF12A),ENSG00000011422(PLAUR),ENSG00000013588(GPRC5A),ENSG00000023445(BIRC3),ENSG00000026036(RTEL1-TNFRSF6B),ENSG00000031081(ARHGAP31),ENSG00000047648(ARHGAP6),ENSG00000056558(TRAF1),ENSG00000057657(PRDM1),ENSG00000062038(CDH3),ENSG00000065618(COL17A1),ENSG00000069399(BCL3),ENSG00000074181(NOTCH3),ENSG00000074416(MGLL),ENSG00000077238(IL4R),ENSG0000009033…	ENSG00000069696(DRD4),ENSG00000078401(EDN1),ENSG00000078900(TP73),ENSG00000092529(CAPN3),ENSG00000105974(CAV1),ENSG00000106018(VIPR2),ENSG00000108984(MAP2K6),ENSG00000109846(CRYAB),ENSG00000113721(PDGFRB),ENSG00000114854(TNNC1),ENSG00000120899(PTK2B),ENSG00000127129(EDN2),ENSG00000132326(PER2),ENSG00000132522(GPS2),ENSG00000132965(ALOX5AP),ENSG00000134215(VAV3),ENSG00000135253(KCP),ENSG0000013744…
BP	GO:0050896	response to stimulus	273	71	344	9114	5.02677e-16	9.77912e-13	ENSG00000003436(TFPI),ENSG00000004799(PDK4),ENSG00000006327(TNFRSF12A),ENSG00000011422(PLAUR),ENSG00000013588(GPRC5A),ENSG00000019186(CYP24A1),ENSG00000023171(GRAMD1B),ENSG00000023445(BIRC3),ENSG00000026036(RTEL1-TNFRSF6B),ENSG00000031081(ARHGAP31),ENSG00000036530(CYP46A1),ENSG00000047648(ARHGAP6),ENSG00000049249(TNFRSF9),ENSG00000056558(TRAF1),ENSG00000057657(PRDM1),ENSG00000059804(SLC2A3),ENSG0…	ENSG00000006534(ALDH3B1),ENSG00000064205(CCN5),ENSG00000069696(DRD4),ENSG00000078401(EDN1),ENSG00000078900(TP73),ENSG00000092529(CAPN3),ENSG00000100271(TTLL1),ENSG00000100298(APOBEC3H),ENSG00000102048(ASB9),ENSG00000105974(CAV1),ENSG00000106018(VIPR2),ENSG00000107099(DOCK8),ENSG00000108602(ALDH3A1),ENSG00000108984(MAP2K6),ENSG00000109846(CRYAB),ENSG00000113721(PDGFRB),ENSG00000114854(TNNC1),ENSG0…
BP	GO:0051716	cellular response to stimulus	237	58	295	7552	3.78771e-14	3.36414e-11	ENSG00000003436(TFPI),ENSG00000004799(PDK4),ENSG00000006327(TNFRSF12A),ENSG00000011422(PLAUR),ENSG00000013588(GPRC5A),ENSG00000019186(CYP24A1),ENSG00000023171(GRAMD1B),ENSG00000023445(BIRC3),ENSG00000026036(RTEL1-TNFRSF6B),ENSG00000031081(ARHGAP31),ENSG00000036530(CYP46A1),ENSG00000047648(ARHGAP6),ENSG00000049249(TNFRSF9),ENSG00000056558(TRAF1),ENSG00000057657(PRDM1),ENSG00000062038(CDH3),ENSG000…	ENSG00000006534(ALDH3B1),ENSG00000064205(CCN5),ENSG00000069696(DRD4),ENSG00000078401(EDN1),ENSG00000078900(TP73),ENSG00000092529(CAPN3),ENSG00000102048(ASB9),ENSG00000105974(CAV1),ENSG00000106018(VIPR2),ENSG00000107099(DOCK8),ENSG00000108602(ALDH3A1),ENSG00000108984(MAP2K6),ENSG00000109846(CRYAB),ENSG00000113721(PDGFRB),ENSG00000115596(WNT6),ENSG00000115705(TPO),ENSG00000115738(ID2),ENSG000001208…
BP	GO:0070887	cellular response to chemical stimulus	138	40	178	3351	2.71917e-19	2.22537e-15	ENSG00000003436(TFPI),ENSG00000004799(PDK4),ENSG00000006327(TNFRSF12A),ENSG00000019186(CYP24A1),ENSG00000023171(GRAMD1B),ENSG00000023445(BIRC3),ENSG00000036530(CYP46A1),ENSG00000049249(TNFRSF9),ENSG00000056558(TRAF1),ENSG00000065621(GSTO2),ENSG00000077238(IL4R),ENSG00000079337(RAPGEF3),ENSG00000081041(CXCL2),ENSG00000088826(SMOX),ENSG00000090339(ICAM1),ENSG00000095303(PTGS1),ENSG00000095637(SORBS…	ENSG00000006534(ALDH3B1),ENSG00000069696(DRD4),ENSG00000078401(EDN1),ENSG00000092529(CAPN3),ENSG00000105974(CAV1),ENSG00000107099(DOCK8),ENSG00000108602(ALDH3A1),ENSG00000108984(MAP2K6),ENSG00000113721(PDGFRB),ENSG00000115596(WNT6),ENSG00000115705(TPO),ENSG00000120899(PTK2B),ENSG00000127129(EDN2),ENSG00000131711(MAP1B),ENSG00000132522(GPS2),ENSG00000132965(ALOX5AP),ENSG00000134215(VAV3),ENSG00000…
BP	GO:0009605	response to external stimulus	127	29	156	2949	2.25684e-16	6.2217e-13	ENSG00000003436(TFPI),ENSG00000004799(PDK4),ENSG00000011422(PLAUR),ENSG00000019186(CYP24A1),ENSG00000023445(BIRC3),ENSG00000057657(PRDM1),ENSG00000069399(BCL3),ENSG00000074181(NOTCH3),ENSG00000074416(MGLL),ENSG00000077150(NFKB2),ENSG00000077238(IL4R),ENSG00000081041(CXCL2),ENSG00000083067(TRPM3),ENSG00000090339(ICAM1),ENSG00000100906(NFKBIA),ENSG00000103175(WFDC1),ENSG00000104856(RELB),ENSG000001…	ENSG00000078401(EDN1),ENSG00000092529(CAPN3),ENSG00000100298(APOBEC3H),ENSG00000105974(CAV1),ENSG00000106018(VIPR2),ENSG00000108602(ALDH3A1),ENSG00000113721(PDGFRB),ENSG00000115738(ID2),ENSG00000120899(PTK2B),ENSG00000125966(MMP24),ENSG00000127129(EDN2),ENSG00000131050(BPIFA2),ENSG00000131711(MAP1B),ENSG00000132326(PER2),ENSG00000132522(GPS2),ENSG00000132965(ALOX5AP),ENSG00000134215(VAV3),ENSG000…
BP	GO:0010033	response to organic substance	134	36	170	3343	2.28068e-16	6.2217e-13	ENSG00000003436(TFPI),ENSG00000004799(PDK4),ENSG00000006327(TNFRSF12A),ENSG00000019186(CYP24A1),ENSG00000023171(GRAMD1B),ENSG00000023445(BIRC3),ENSG00000049249(TNFRSF9),ENSG00000056558(TRAF1),ENSG00000077150(NFKB2),ENSG00000077238(IL4R),ENSG00000079337(RAPGEF3),ENSG00000081041(CXCL2),ENSG00000090339(ICAM1),ENSG00000095637(SORBS1),ENSG00000095752(IL11),ENSG00000100906(NFKBIA),ENSG00000103175(WFDC1…	ENSG00000069696(DRD4),ENSG00000078401(EDN1),ENSG00000078900(TP73),ENSG00000105974(CAV1),ENSG00000107099(DOCK8),ENSG00000108602(ALDH3A1),ENSG00000108984(MAP2K6),ENSG00000109846(CRYAB),ENSG00000113721(PDGFRB),ENSG00000115596(WNT6),ENSG00000120899(PTK2B),ENSG00000127129(EDN2),ENSG00000131711(MAP1B),ENSG00000132522(GPS2),ENSG00000135253(KCP),ENSG00000136378(ADAMTS7),ENSG00000137440(FGFBP1),ENSG000001…
BP	GO:0050896	response to stimulus	273	71	344	9114	5.02677e-16	9.77912e-13	ENSG00000003436(TFPI),ENSG00000004799(PDK4),ENSG00000006327(TNFRSF12A),ENSG00000011422(PLAUR),ENSG00000013588(GPRC5A),ENSG00000019186(CYP24A1),ENSG00000023171(GRAMD1B),ENSG00000023445(BIRC3),ENSG00000026036(RTEL1-TNFRSF6B),ENSG00000031081(ARHGAP31),ENSG00000036530(CYP46A1),ENSG00000047648(ARHGAP6),ENSG00000049249(TNFRSF9),ENSG00000056558(TRAF1),ENSG00000057657(PRDM1),ENSG00000059804(SLC2A3),ENSG0…	ENSG00000006534(ALDH3B1),ENSG00000064205(CCN5),ENSG00000069696(DRD4),ENSG00000078401(EDN1),ENSG00000078900(TP73),ENSG00000092529(CAPN3),ENSG00000100271(TTLL1),ENSG00000100298(APOBEC3H),ENSG00000102048(ASB9),ENSG00000105974(CAV1),ENSG00000106018(VIPR2),ENSG00000107099(DOCK8),ENSG00000108602(ALDH3A1),ENSG00000108984(MAP2K6),ENSG00000109846(CRYAB),ENSG00000113721(PDGFRB),ENSG00000114854(TNNC1),ENSG0…
BP	GO:0034097	response to cytokine	68	18	86	1200	5.97453e-16	9.77912e-13	ENSG00000003436(TFPI),ENSG00000006327(TNFRSF12A),ENSG00000023445(BIRC3),ENSG00000049249(TNFRSF9),ENSG00000056558(TRAF1),ENSG00000077150(NFKB2),ENSG00000077238(IL4R),ENSG00000081041(CXCL2),ENSG00000090339(ICAM1),ENSG00000095752(IL11),ENSG00000100906(NFKBIA),ENSG00000104856(RELB),ENSG00000105246(EBI3),ENSG00000106089(STX1A),ENSG00000108691(CCL2),ENSG00000110330(BIRC2),ENSG00000112096(SOD2),ENSG0000…	ENSG00000078401(EDN1),ENSG00000105974(CAV1),ENSG00000107099(DOCK8),ENSG00000120899(PTK2B),ENSG00000127129(EDN2),ENSG00000132522(GPS2),ENSG00000136378(ADAMTS7),ENSG00000140795(MYLK3),ENSG00000141510(TP53),ENSG00000143365(RORC),ENSG00000164850(GPER1),ENSG00000165029(ABCA1),ENSG00000182621(PLCB1),ENSG00000184489(PTP4A3),ENSG00000186642(PDE2A),ENSG00000196549(MME),ENSG00000272398(CD24),ENSG0000027660…
BP	GO:0042221	response to chemical	169	48	217	4816	1.4145e-15	1.92938e-12	ENSG00000003436(TFPI),ENSG00000004799(PDK4),ENSG00000006327(TNFRSF12A),ENSG00000011422(PLAUR),ENSG00000019186(CYP24A1),ENSG00000023171(GRAMD1B),ENSG00000023445(BIRC3),ENSG00000036530(CYP46A1),ENSG00000049249(TNFRSF9),ENSG00000056558(TRAF1),ENSG00000062038(CDH3),ENSG00000065621(GSTO2),ENSG00000074181(NOTCH3),ENSG00000077150(NFKB2),ENSG00000077238(IL4R),ENSG00000079337(RAPGEF3),ENSG00000081041(CXCL…	ENSG00000006534(ALDH3B1),ENSG00000069696(DRD4),ENSG00000078401(EDN1),ENSG00000078900(TP73),ENSG00000092529(CAPN3),ENSG00000105974(CAV1),ENSG00000107099(DOCK8),ENSG00000108602(ALDH3A1),ENSG00000108984(MAP2K6),ENSG00000109846(CRYAB),ENSG00000113721(PDGFRB),ENSG00000114854(TNNC1),ENSG00000115596(WNT6),ENSG00000115705(TPO),ENSG00000120899(PTK2B),ENSG00000120915(EPHX2),ENSG00000127129(EDN2),ENSG000001…
BP	GO:0071345	cellular response to cytokine stimulus	63	18	81	1112	1.97119e-15	2.30461e-12	ENSG00000003436(TFPI),ENSG00000006327(TNFRSF12A),ENSG00000023445(BIRC3),ENSG00000049249(TNFRSF9),ENSG00000056558(TRAF1),ENSG00000077238(IL4R),ENSG00000081041(CXCL2),ENSG00000090339(ICAM1),ENSG00000095752(IL11),ENSG00000100906(NFKBIA),ENSG00000105246(EBI3),ENSG00000106089(STX1A),ENSG00000108691(CCL2),ENSG00000110330(BIRC2),ENSG00000112096(SOD2),ENSG00000115008(IL1A),ENSG00000115009(CCL20),ENSG0000…	ENSG00000078401(EDN1),ENSG00000105974(CAV1),ENSG00000107099(DOCK8),ENSG00000120899(PTK2B),ENSG00000127129(EDN2),ENSG00000132522(GPS2),ENSG00000136378(ADAMTS7),ENSG00000140795(MYLK3),ENSG00000141510(TP53),ENSG00000143365(RORC),ENSG00000164850(GPER1),ENSG00000165029(ABCA1),ENSG00000182621(PLCB1),ENSG00000184489(PTP4A3),ENSG00000186642(PDE2A),ENSG00000196549(MME),ENSG00000272398(CD24),ENSG0000027660…
BP	GO:0071310	cellular response to organic substance	110	32	142	2742	5.4503e-14	4.05503e-11	ENSG00000003436(TFPI),ENSG00000004799(PDK4),ENSG00000006327(TNFRSF12A),ENSG00000019186(CYP24A1),ENSG00000023171(GRAMD1B),ENSG00000023445(BIRC3),ENSG00000049249(TNFRSF9),ENSG00000056558(TRAF1),ENSG00000077238(IL4R),ENSG00000079337(RAPGEF3),ENSG00000081041(CXCL2),ENSG00000090339(ICAM1),ENSG00000095637(SORBS1),ENSG00000095752(IL11),ENSG00000100906(NFKBIA),ENSG00000105246(EBI3),ENSG00000105855(ITGB8)…	ENSG00000069696(DRD4),ENSG00000078401(EDN1),ENSG00000105974(CAV1),ENSG00000107099(DOCK8),ENSG00000108984(MAP2K6),ENSG00000113721(PDGFRB),ENSG00000115596(WNT6),ENSG00000120899(PTK2B),ENSG00000127129(EDN2),ENSG00000131711(MAP1B),ENSG00000132522(GPS2),ENSG00000135253(KCP),ENSG00000136378(ADAMTS7),ENSG00000137440(FGFBP1),ENSG00000137642(SORL1),ENSG00000140795(MYLK3),ENSG00000141510(TP53),ENSG00000143…
BP	GO:0001775	cell activation	67	20	87	1419	2.9507e-12	1.09766e-09	ENSG00000011422(PLAUR),ENSG00000057657(PRDM1),ENSG00000059804(SLC2A3),ENSG00000069399(BCL3),ENSG00000077150(NFKB2),ENSG00000077238(IL4R),ENSG00000086062(B4GALT1),ENSG00000090339(ICAM1),ENSG00000095752(IL11),ENSG00000104856(RELB),ENSG00000105246(EBI3),ENSG00000105855(ITGB8),ENSG00000106799(TGFBR1),ENSG00000108219(TSPAN14),ENSG00000108691(CCL2),ENSG00000108840(HDAC5),ENSG00000110799(VWF),ENSG000001…	ENSG00000006534(ALDH3B1),ENSG00000078401(EDN1),ENSG00000092529(CAPN3),ENSG00000105974(CAV1),ENSG00000107099(DOCK8),ENSG00000113721(PDGFRB),ENSG00000115738(ID2),ENSG00000120899(PTK2B),ENSG00000127129(EDN2),ENSG00000132522(GPS2),ENSG00000134215(VAV3),ENSG00000141510(TP53),ENSG00000143365(RORC),ENSG00000154096(THY1),ENSG00000164850(GPER1),ENSG00000165409(TSHR),ENSG00000166407(LMO1),ENSG00000182621(P…
BP	GO:1902680	positive regulation of RNA biosynthetic process	49	14	63	1631	0.00622678	0.0566222	ENSG00000006459(KDM7A),ENSG00000069399(BCL3),ENSG00000074181(NOTCH3),ENSG00000077150(NFKB2),ENSG00000095752(IL11),ENSG00000100906(NFKBIA),ENSG00000101928(MOSPD1),ENSG00000106799(TGFBR1),ENSG00000108840(HDAC5),ENSG00000110330(BIRC2),ENSG00000115008(IL1A),ENSG00000116017(ARID3A),ENSG00000120738(EGR1),ENSG00000122877(EGR2),ENSG00000123358(NR4A1),ENSG00000125740(FOSB),ENSG00000128342(LIF),ENSG0000012…	ENSG00000078401(EDN1),ENSG00000078900(TP73),ENSG00000092529(CAPN3),ENSG00000105516(DBP),ENSG00000115596(WNT6),ENSG00000115738(ID2),ENSG00000132326(PER2),ENSG00000132522(GPS2),ENSG00000141510(TP53),ENSG00000143365(RORC),ENSG00000164850(GPER1),ENSG00000166407(LMO1),ENSG00000182621(PLCB1),ENSG00000198353(HOXC4)
BP	GO:0042127	regulation of cell population proliferation	76	19	95	1654	1.02315e-11	3.22055e-09	ENSG00000049249(TNFRSF9),ENSG00000057657(PRDM1),ENSG00000062038(CDH3),ENSG00000077238(IL4R),ENSG00000086062(B4GALT1),ENSG00000090530(P3H2),ENSG00000095303(PTGS1),ENSG00000095752(IL11),ENSG00000100906(NFKBIA),ENSG00000103175(WFDC1),ENSG00000105246(EBI3),ENSG00000106799(TGFBR1),ENSG00000108691(CCL2),ENSG00000109321(AREG),ENSG00000110330(BIRC2),ENSG00000112096(SOD2),ENSG00000113070(HBEGF),ENSG000001…	ENSG00000078401(EDN1),ENSG00000078900(TP73),ENSG00000105974(CAV1),ENSG00000106018(VIPR2),ENSG00000108602(ALDH3A1),ENSG00000113721(PDGFRB),ENSG00000115738(ID2),ENSG00000120899(PTK2B),ENSG00000127129(EDN2),ENSG00000132326(PER2),ENSG00000134215(VAV3),ENSG00000137440(FGFBP1),ENSG00000141510(TP53),ENSG00000163082(SGPP2),ENSG00000164741(DLC1),ENSG00000164850(GPER1),ENSG00000165409(TSHR),ENSG00000166407…
BP	GO:0051239	regulation of multicellular organismal process	125	30	155	3256	2.73747e-12	1.06683e-09	ENSG00000003436(TFPI),ENSG00000004799(PDK4),ENSG00000011422(PLAUR),ENSG00000023445(BIRC3),ENSG00000057657(PRDM1),ENSG00000062038(CDH3),ENSG00000069399(BCL3),ENSG00000074416(MGLL),ENSG00000077150(NFKB2),ENSG00000077238(IL4R),ENSG00000079337(RAPGEF3),ENSG00000090339(ICAM1),ENSG00000100906(NFKBIA),ENSG00000102057(KCND1),ENSG00000103528(SYT17),ENSG00000103647(CORO2B),ENSG00000104856(RELB),ENSG0000010…	ENSG00000078401(EDN1),ENSG00000078900(TP73),ENSG00000092529(CAPN3),ENSG00000100271(TTLL1),ENSG00000105974(CAV1),ENSG00000108984(MAP2K6),ENSG00000113721(PDGFRB),ENSG00000114854(TNNC1),ENSG00000115596(WNT6),ENSG00000115738(ID2),ENSG00000120899(PTK2B),ENSG00000127129(EDN2),ENSG00000131711(MAP1B),ENSG00000132326(PER2),ENSG00000136378(ADAMTS7),ENSG00000137440(FGFBP1),ENSG00000137642(SORL1),ENSG0000014…
BP	GO:0051240	positive regulation of multicellular organismal process	78	20	98	1812	1.35895e-10	2.64801e-08	ENSG00000023445(BIRC3),ENSG00000069399(BCL3),ENSG00000077150(NFKB2),ENSG00000077238(IL4R),ENSG00000079337(RAPGEF3),ENSG00000090339(ICAM1),ENSG00000103528(SYT17),ENSG00000105246(EBI3),ENSG00000105855(ITGB8),ENSG00000106089(STX1A),ENSG00000106799(TGFBR1),ENSG00000107984(DKK1),ENSG00000110330(BIRC2),ENSG00000112096(SOD2),ENSG00000112149(CD83),ENSG00000112299(VNN1),ENSG00000113070(HBEGF),ENSG00000115…	ENSG00000078401(EDN1),ENSG00000078900(TP73),ENSG00000105974(CAV1),ENSG00000113721(PDGFRB),ENSG00000115596(WNT6),ENSG00000115738(ID2),ENSG00000120899(PTK2B),ENSG00000127129(EDN2),ENSG00000131711(MAP1B),ENSG00000132326(PER2),ENSG00000137440(FGFBP1),ENSG00000137642(SORL1),ENSG00000164850(GPER1),ENSG00000165029(ABCA1),ENSG00000165409(TSHR),ENSG00000182621(PLCB1),ENSG00000196549(MME),ENSG00000211448(D…
BP	GO:0048518	positive regulation of biological process	198	49	247	6230	1.78106e-11	5.20579e-09	ENSG00000006327(TNFRSF12A),ENSG00000006459(KDM7A),ENSG00000011422(PLAUR),ENSG00000013588(GPRC5A),ENSG00000023445(BIRC3),ENSG00000036530(CYP46A1),ENSG00000056558(TRAF1),ENSG00000057657(PRDM1),ENSG00000062038(CDH3),ENSG00000069399(BCL3),ENSG00000074181(NOTCH3),ENSG00000077150(NFKB2),ENSG00000077238(IL4R),ENSG00000079337(RAPGEF3),ENSG00000086062(B4GALT1),ENSG00000090339(ICAM1),ENSG00000090924(PLEKHG…	ENSG00000069696(DRD4),ENSG00000078401(EDN1),ENSG00000078900(TP73),ENSG00000092529(CAPN3),ENSG00000102048(ASB9),ENSG00000105516(DBP),ENSG00000105974(CAV1),ENSG00000106823(ECM2),ENSG00000107099(DOCK8),ENSG00000108602(ALDH3A1),ENSG00000108984(MAP2K6),ENSG00000113721(PDGFRB),ENSG00000115596(WNT6),ENSG00000115738(ID2),ENSG00000120899(PTK2B),ENSG00000120915(EPHX2),ENSG00000127129(EDN2),ENSG00000131711(…
BP	GO:0008283	cell population proliferation	84	21	105	1937	2.1354e-11	6.02376e-09	ENSG00000049249(TNFRSF9),ENSG00000057657(PRDM1),ENSG00000062038(CDH3),ENSG00000077238(IL4R),ENSG00000086062(B4GALT1),ENSG00000090530(P3H2),ENSG00000095303(PTGS1),ENSG00000095752(IL11),ENSG00000100906(NFKBIA),ENSG00000103175(WFDC1),ENSG00000105246(EBI3),ENSG00000106799(TGFBR1),ENSG00000108691(CCL2),ENSG00000109321(AREG),ENSG00000110330(BIRC2),ENSG00000112096(SOD2),ENSG00000113070(HBEGF),ENSG000001…	ENSG00000078401(EDN1),ENSG00000078900(TP73),ENSG00000105974(CAV1),ENSG00000106018(VIPR2),ENSG00000107099(DOCK8),ENSG00000108602(ALDH3A1),ENSG00000113721(PDGFRB),ENSG00000115738(ID2),ENSG00000120899(PTK2B),ENSG00000127129(EDN2),ENSG00000132326(PER2),ENSG00000134215(VAV3),ENSG00000137440(FGFBP1),ENSG00000141510(TP53),ENSG00000163082(SGPP2),ENSG00000164741(DLC1),ENSG00000164850(GPER1),ENSG0000016540…
BP	GO:0007155	cell adhesion	77	13	90	1472	1.33517e-12	6.06941e-10	ENSG00000006327(TNFRSF12A),ENSG00000011422(PLAUR),ENSG00000047648(ARHGAP6),ENSG00000062038(CDH3),ENSG00000065618(COL17A1),ENSG00000077238(IL4R),ENSG00000086062(B4GALT1),ENSG00000090339(ICAM1),ENSG00000095637(SORBS1),ENSG00000102531(FNDC3A),ENSG00000103647(CORO2B),ENSG00000105246(EBI3),ENSG00000105855(ITGB8),ENSG00000108691(CCL2),ENSG00000110799(VWF),ENSG00000111859(NEDD9),ENSG00000112149(CD83),EN…	ENSG00000064205(CCN5),ENSG00000105974(CAV1),ENSG00000106823(ECM2),ENSG00000107099(DOCK8),ENSG00000120899(PTK2B),ENSG00000125966(MMP24),ENSG00000134215(VAV3),ENSG00000154096(THY1),ENSG00000164741(DLC1),ENSG00000184363(PKP3),ENSG00000196159(FAT4),ENSG00000205221(VIT),ENSG00000272398(CD24)
BP	GO:0022610	biological adhesion	77	13	90	1479	1.74103e-12	7.1243e-10	ENSG00000006327(TNFRSF12A),ENSG00000011422(PLAUR),ENSG00000047648(ARHGAP6),ENSG00000062038(CDH3),ENSG00000065618(COL17A1),ENSG00000077238(IL4R),ENSG00000086062(B4GALT1),ENSG00000090339(ICAM1),ENSG00000095637(SORBS1),ENSG00000102531(FNDC3A),ENSG00000103647(CORO2B),ENSG00000105246(EBI3),ENSG00000105855(ITGB8),ENSG00000108691(CCL2),ENSG00000110799(VWF),ENSG00000111859(NEDD9),ENSG00000112149(CD83),EN…	ENSG00000064205(CCN5),ENSG00000105974(CAV1),ENSG00000106823(ECM2),ENSG00000107099(DOCK8),ENSG00000120899(PTK2B),ENSG00000125966(MMP24),ENSG00000134215(VAV3),ENSG00000154096(THY1),ENSG00000164741(DLC1),ENSG00000184363(PKP3),ENSG00000196159(FAT4),ENSG00000205221(VIT),ENSG00000272398(CD24)
BP	GO:0065009	regulation of molecular function	116	34	150	3117	3.18353e-12	1.13278e-09	ENSG00000003436(TFPI),ENSG00000011422(PLAUR),ENSG00000013588(GPRC5A),ENSG00000023445(BIRC3),ENSG00000031081(ARHGAP31),ENSG00000047648(ARHGAP6),ENSG00000053524(MCF2L2),ENSG00000056558(TRAF1),ENSG00000062038(CDH3),ENSG00000069399(BCL3),ENSG00000077150(NFKB2),ENSG00000079337(RAPGEF3),ENSG00000080031(PTPRH),ENSG00000090339(ICAM1),ENSG00000090924(PLEKHG2),ENSG00000095383(TBC1D2),ENSG00000100100(PIK3IP…	ENSG00000069696(DRD4),ENSG00000078401(EDN1),ENSG00000078900(TP73),ENSG00000087495(PHACTR3),ENSG00000092529(CAPN3),ENSG00000105974(CAV1),ENSG00000106018(VIPR2),ENSG00000107099(DOCK8),ENSG00000108984(MAP2K6),ENSG00000109846(CRYAB),ENSG00000113721(PDGFRB),ENSG00000114854(TNNC1),ENSG00000115738(ID2),ENSG00000120899(PTK2B),ENSG00000126838(PZP),ENSG00000127129(EDN2),ENSG00000132326(PER2),ENSG0000013252…
BP	GO:0040011	locomotion	83	21	104	1864	4.84221e-12	1.65119e-09	ENSG00000011422(PLAUR),ENSG00000074181(NOTCH3),ENSG00000081041(CXCL2),ENSG00000086062(B4GALT1),ENSG00000090339(ICAM1),ENSG00000103888(CEMIP),ENSG00000105855(ITGB8),ENSG00000106799(TGFBR1),ENSG00000108691(CCL2),ENSG00000108840(HDAC5),ENSG00000111859(NEDD9),ENSG00000112096(SOD2),ENSG00000112245(PTP4A1),ENSG00000113070(HBEGF),ENSG00000113369(ARRDC3),ENSG00000115009(CCL20),ENSG00000116106(EPHA4),ENSG…	ENSG00000078401(EDN1),ENSG00000100271(TTLL1),ENSG00000105974(CAV1),ENSG00000107099(DOCK8),ENSG00000113721(PDGFRB),ENSG00000120899(PTK2B),ENSG00000127129(EDN2),ENSG00000131711(MAP1B),ENSG00000134215(VAV3),ENSG00000137440(FGFBP1),ENSG00000137642(SORL1),ENSG00000146376(ARHGAP18),ENSG00000151023(ENKUR),ENSG00000154096(THY1),ENSG00000164741(DLC1),ENSG00000164850(GPER1),ENSG00000165409(TSHR),ENSG000001…
BP	GO:0007275	multicellular organism development	167	54	221	5528	3.18133e-10	5.20719e-08	ENSG00000006327(TNFRSF12A),ENSG00000006459(KDM7A),ENSG00000010030(ETV7),ENSG00000036530(CYP46A1),ENSG00000057657(PRDM1),ENSG00000062038(CDH3),ENSG00000069399(BCL3),ENSG00000074181(NOTCH3),ENSG00000077150(NFKB2),ENSG00000077238(IL4R),ENSG00000079337(RAPGEF3),ENSG00000086062(B4GALT1),ENSG00000090339(ICAM1),ENSG00000095752(IL11),ENSG00000100906(NFKBIA),ENSG00000102531(FNDC3A),ENSG00000103528(SYT17),…	ENSG00000007237(GAS7),ENSG00000049192(ADAMTS6),ENSG00000078401(EDN1),ENSG00000078900(TP73),ENSG00000092529(CAPN3),ENSG00000092758(COL9A3),ENSG00000100271(TTLL1),ENSG00000103489(XYLT1),ENSG00000105516(DBP),ENSG00000105974(CAV1),ENSG00000108984(MAP2K6),ENSG00000109846(CRYAB),ENSG00000113721(PDGFRB),ENSG00000114854(TNNC1),ENSG00000115596(WNT6),ENSG00000115705(TPO),ENSG00000115738(ID2),ENSG0000012089…
BP	GO:0048646	anatomical structure formation involved in morphogenesis	52	13	65	1103	1.18019e-08	1.09757e-06	ENSG00000006327(TNFRSF12A),ENSG00000069399(BCL3),ENSG00000077150(NFKB2),ENSG00000077238(IL4R),ENSG00000079337(RAPGEF3),ENSG00000086062(B4GALT1),ENSG00000105855(ITGB8),ENSG00000106799(TGFBR1),ENSG00000107984(DKK1),ENSG00000108691(CCL2),ENSG00000108840(HDAC5),ENSG00000115008(IL1A),ENSG00000118503(TNFAIP3),ENSG00000118523(CCN2),ENSG00000120129(DUSP1),ENSG00000120875(DUSP4),ENSG00000122877(EGR2),ENSG…	ENSG00000078401(EDN1),ENSG00000092529(CAPN3),ENSG00000100271(TTLL1),ENSG00000105974(CAV1),ENSG00000113721(PDGFRB),ENSG00000115596(WNT6),ENSG00000120899(PTK2B),ENSG00000134215(VAV3),ENSG00000137440(FGFBP1),ENSG00000140795(MYLK3),ENSG00000141510(TP53),ENSG00000154096(THY1),ENSG00000164741(DLC1)
BP	GO:0048856	anatomical structure development	177	56	233	6023	1.7892e-09	2.24248e-07	ENSG00000006327(TNFRSF12A),ENSG00000006459(KDM7A),ENSG00000010030(ETV7),ENSG00000036530(CYP46A1),ENSG00000057657(PRDM1),ENSG00000062038(CDH3),ENSG00000065618(COL17A1),ENSG00000069399(BCL3),ENSG00000074181(NOTCH3),ENSG00000077150(NFKB2),ENSG00000077238(IL4R),ENSG00000079337(RAPGEF3),ENSG00000086062(B4GALT1),ENSG00000090339(ICAM1),ENSG00000095752(IL11),ENSG00000100906(NFKBIA),ENSG00000102531(FNDC3A…	ENSG00000007237(GAS7),ENSG00000049192(ADAMTS6),ENSG00000078401(EDN1),ENSG00000078900(TP73),ENSG00000092529(CAPN3),ENSG00000092758(COL9A3),ENSG00000100271(TTLL1),ENSG00000103489(XYLT1),ENSG00000105516(DBP),ENSG00000105974(CAV1),ENSG00000108984(MAP2K6),ENSG00000109846(CRYAB),ENSG00000113721(PDGFRB),ENSG00000114854(TNNC1),ENSG00000115596(WNT6),ENSG00000115705(TPO),ENSG00000115738(ID2),ENSG0000012089…
BP	GO:0009653	anatomical structure morphogenesis	98	23	121	2704	6.98934e-08	4.9593e-06	ENSG00000006327(TNFRSF12A),ENSG00000010030(ETV7),ENSG00000057657(PRDM1),ENSG00000069399(BCL3),ENSG00000074181(NOTCH3),ENSG00000077150(NFKB2),ENSG00000077238(IL4R),ENSG00000079337(RAPGEF3),ENSG00000086062(B4GALT1),ENSG00000090339(ICAM1),ENSG00000103528(SYT17),ENSG00000105855(ITGB8),ENSG00000106799(TGFBR1),ENSG00000107159(CA9),ENSG00000107554(DNMBP),ENSG00000107984(DKK1),ENSG00000108691(CCL2),ENSG0…	ENSG00000007237(GAS7),ENSG00000078401(EDN1),ENSG00000092529(CAPN3),ENSG00000100271(TTLL1),ENSG00000105974(CAV1),ENSG00000109846(CRYAB),ENSG00000113721(PDGFRB),ENSG00000114854(TNNC1),ENSG00000115596(WNT6),ENSG00000115738(ID2),ENSG00000120899(PTK2B),ENSG00000131711(MAP1B),ENSG00000134215(VAV3),ENSG00000137440(FGFBP1),ENSG00000140795(MYLK3),ENSG00000141510(TP53),ENSG00000146376(ARHGAP18),ENSG0000015…
BP	GO:0009893	positive regulation of metabolic process	128	32	160	3896	8.44065e-08	5.85409e-06	ENSG00000006459(KDM7A),ENSG00000011422(PLAUR),ENSG00000013588(GPRC5A),ENSG00000023445(BIRC3),ENSG00000056558(TRAF1),ENSG00000057657(PRDM1),ENSG00000062038(CDH3),ENSG00000069399(BCL3),ENSG00000074181(NOTCH3),ENSG00000077150(NFKB2),ENSG00000077238(IL4R),ENSG00000079337(RAPGEF3),ENSG00000090339(ICAM1),ENSG00000095637(SORBS1),ENSG00000095752(IL11),ENSG00000100906(NFKBIA),ENSG00000101928(MOSPD1),ENSG0…	ENSG00000069696(DRD4),ENSG00000078401(EDN1),ENSG00000078900(TP73),ENSG00000092529(CAPN3),ENSG00000102048(ASB9),ENSG00000105516(DBP),ENSG00000105974(CAV1),ENSG00000108984(MAP2K6),ENSG00000113721(PDGFRB),ENSG00000115596(WNT6),ENSG00000115738(ID2),ENSG00000120899(PTK2B),ENSG00000120915(EPHX2),ENSG00000127129(EDN2),ENSG00000132326(PER2),ENSG00000132522(GPS2),ENSG00000134215(VAV3),ENSG00000137642(SORL…
BP	GO:0050793	regulation of developmental process	95	32	127	2671	6.67975e-10	9.49594e-08	ENSG00000057657(PRDM1),ENSG00000062038(CDH3),ENSG00000074181(NOTCH3),ENSG00000077238(IL4R),ENSG00000079337(RAPGEF3),ENSG00000090339(ICAM1),ENSG00000100906(NFKBIA),ENSG00000103528(SYT17),ENSG00000105855(ITGB8),ENSG00000106799(TGFBR1),ENSG00000107554(DNMBP),ENSG00000107984(DKK1),ENSG00000108691(CCL2),ENSG00000108840(HDAC5),ENSG00000109321(AREG),ENSG00000110330(BIRC2),ENSG00000111859(NEDD9),ENSG0000…	ENSG00000078401(EDN1),ENSG00000078900(TP73),ENSG00000092529(CAPN3),ENSG00000100271(TTLL1),ENSG00000105974(CAV1),ENSG00000113721(PDGFRB),ENSG00000115596(WNT6),ENSG00000115738(ID2),ENSG00000120899(PTK2B),ENSG00000131711(MAP1B),ENSG00000132326(PER2),ENSG00000132522(GPS2),ENSG00000136378(ADAMTS7),ENSG00000137440(FGFBP1),ENSG00000137642(SORL1),ENSG00000140795(MYLK3),ENSG00000141510(TP53),ENSG000001433…
BP	GO:0010628	positive regulation of gene expression	78	22	100	2425	4.43825e-05	0.00120673	ENSG00000006459(KDM7A),ENSG00000023445(BIRC3),ENSG00000057657(PRDM1),ENSG00000062038(CDH3),ENSG00000069399(BCL3),ENSG00000074181(NOTCH3),ENSG00000077150(NFKB2),ENSG00000077238(IL4R),ENSG00000095752(IL11),ENSG00000100906(NFKBIA),ENSG00000101928(MOSPD1),ENSG00000104856(RELB),ENSG00000105246(EBI3),ENSG00000105855(ITGB8),ENSG00000106799(TGFBR1),ENSG00000107984(DKK1),ENSG00000108840(HDAC5),ENSG0000011…	ENSG00000078401(EDN1),ENSG00000078900(TP73),ENSG00000092529(CAPN3),ENSG00000105516(DBP),ENSG00000105974(CAV1),ENSG00000115596(WNT6),ENSG00000115738(ID2),ENSG00000120899(PTK2B),ENSG00000120915(EPHX2),ENSG00000132326(PER2),ENSG00000132522(GPS2),ENSG00000137642(SORL1),ENSG00000141510(TP53),ENSG00000143365(RORC),ENSG00000158246(TENT5B),ENSG00000164850(GPER1),ENSG00000166407(LMO1),ENSG00000182621(PLCB…
BP	GO:0048522	positive regulation of cellular process	172	42	214	5651	1.12428e-07	7.08936e-06	ENSG00000006327(TNFRSF12A),ENSG00000006459(KDM7A),ENSG00000011422(PLAUR),ENSG00000013588(GPRC5A),ENSG00000023445(BIRC3),ENSG00000036530(CYP46A1),ENSG00000056558(TRAF1),ENSG00000062038(CDH3),ENSG00000069399(BCL3),ENSG00000074181(NOTCH3),ENSG00000077150(NFKB2),ENSG00000077238(IL4R),ENSG00000079337(RAPGEF3),ENSG00000086062(B4GALT1),ENSG00000090339(ICAM1),ENSG00000090924(PLEKHG2),ENSG00000095637(SORB…	ENSG00000069696(DRD4),ENSG00000078401(EDN1),ENSG00000078900(TP73),ENSG00000092529(CAPN3),ENSG00000105516(DBP),ENSG00000105974(CAV1),ENSG00000106823(ECM2),ENSG00000107099(DOCK8),ENSG00000108602(ALDH3A1),ENSG00000108984(MAP2K6),ENSG00000113721(PDGFRB),ENSG00000115596(WNT6),ENSG00000115738(ID2),ENSG00000120899(PTK2B),ENSG00000127129(EDN2),ENSG00000131711(MAP1B),ENSG00000132326(PER2),ENSG00000132522(…
BP	GO:0035295	tube development	51	14	65	1047	1.5167e-09	2.00204e-07	ENSG00000006327(TNFRSF12A),ENSG00000057657(PRDM1),ENSG00000079337(RAPGEF3),ENSG00000086062(B4GALT1),ENSG00000105855(ITGB8),ENSG00000106799(TGFBR1),ENSG00000108691(CCL2),ENSG00000108840(HDAC5),ENSG00000109321(AREG),ENSG00000115008(IL1A),ENSG00000116106(EPHA4),ENSG00000116285(ERRFI1),ENSG00000118503(TNFAIP3),ENSG00000118523(CCN2),ENSG00000123358(NR4A1),ENSG00000124145(SDC4),ENSG00000124762(CDKN1A),…	ENSG00000078401(EDN1),ENSG00000105974(CAV1),ENSG00000113721(PDGFRB),ENSG00000115596(WNT6),ENSG00000115738(ID2),ENSG00000120899(PTK2B),ENSG00000127129(EDN2),ENSG00000134215(VAV3),ENSG00000137440(FGFBP1),ENSG00000154096(THY1),ENSG00000164741(DLC1),ENSG00000196159(FAT4),ENSG00000196549(MME),ENSG00000272398(CD24)
BP	GO:0035239	tube morphogenesis	44	11	55	845	6.18573e-09	6.66176e-07	ENSG00000006327(TNFRSF12A),ENSG00000057657(PRDM1),ENSG00000079337(RAPGEF3),ENSG00000086062(B4GALT1),ENSG00000105855(ITGB8),ENSG00000106799(TGFBR1),ENSG00000108691(CCL2),ENSG00000108840(HDAC5),ENSG00000109321(AREG),ENSG00000115008(IL1A),ENSG00000116106(EPHA4),ENSG00000118503(TNFAIP3),ENSG00000118523(CCN2),ENSG00000123358(NR4A1),ENSG00000124145(SDC4),ENSG00000126562(WNK4),ENSG00000129991(TNNI3),ENS…	ENSG00000078401(EDN1),ENSG00000105974(CAV1),ENSG00000113721(PDGFRB),ENSG00000115596(WNT6),ENSG00000115738(ID2),ENSG00000120899(PTK2B),ENSG00000134215(VAV3),ENSG00000137440(FGFBP1),ENSG00000154096(THY1),ENSG00000164741(DLC1),ENSG00000196159(FAT4)
BP	GO:0048731	system development	156	50	206	4957	6.23463e-11	1.41734e-08	ENSG00000006327(TNFRSF12A),ENSG00000006459(KDM7A),ENSG00000010030(ETV7),ENSG00000036530(CYP46A1),ENSG00000057657(PRDM1),ENSG00000062038(CDH3),ENSG00000069399(BCL3),ENSG00000074181(NOTCH3),ENSG00000077150(NFKB2),ENSG00000077238(IL4R),ENSG00000079337(RAPGEF3),ENSG00000086062(B4GALT1),ENSG00000090339(ICAM1),ENSG00000095752(IL11),ENSG00000100906(NFKBIA),ENSG00000102531(FNDC3A),ENSG00000103528(SYT17),…	ENSG00000007237(GAS7),ENSG00000049192(ADAMTS6),ENSG00000078401(EDN1),ENSG00000078900(TP73),ENSG00000092529(CAPN3),ENSG00000092758(COL9A3),ENSG00000100271(TTLL1),ENSG00000103489(XYLT1),ENSG00000105516(DBP),ENSG00000105974(CAV1),ENSG00000108984(MAP2K6),ENSG00000109846(CRYAB),ENSG00000113721(PDGFRB),ENSG00000114854(TNNC1),ENSG00000115596(WNT6),ENSG00000115705(TPO),ENSG00000115738(ID2),ENSG0000012089…
BP	GO:0001944	vasculature development	44	10	54	717	4.50533e-11	1.08446e-08	ENSG00000006327(TNFRSF12A),ENSG00000057657(PRDM1),ENSG00000079337(RAPGEF3),ENSG00000086062(B4GALT1),ENSG00000105855(ITGB8),ENSG00000106799(TGFBR1),ENSG00000108691(CCL2),ENSG00000108840(HDAC5),ENSG00000112096(SOD2),ENSG00000115008(IL1A),ENSG00000116285(ERRFI1),ENSG00000118503(TNFAIP3),ENSG00000118523(CCN2),ENSG00000120738(EGR1),ENSG00000123358(NR4A1),ENSG00000128342(LIF),ENSG00000129991(TNNI3),ENS…	ENSG00000049192(ADAMTS6),ENSG00000078401(EDN1),ENSG00000105974(CAV1),ENSG00000113721(PDGFRB),ENSG00000120899(PTK2B),ENSG00000134215(VAV3),ENSG00000137440(FGFBP1),ENSG00000154096(THY1),ENSG00000164850(GPER1),ENSG00000186642(PDE2A)
BP	GO:0072358	cardiovascular system development	44	10	54	717	4.50533e-11	1.08446e-08	ENSG00000006327(TNFRSF12A),ENSG00000057657(PRDM1),ENSG00000079337(RAPGEF3),ENSG00000086062(B4GALT1),ENSG00000105855(ITGB8),ENSG00000106799(TGFBR1),ENSG00000108691(CCL2),ENSG00000108840(HDAC5),ENSG00000112096(SOD2),ENSG00000115008(IL1A),ENSG00000116285(ERRFI1),ENSG00000118503(TNFAIP3),ENSG00000118523(CCN2),ENSG00000120738(EGR1),ENSG00000123358(NR4A1),ENSG00000128342(LIF),ENSG00000129991(TNNI3),ENS…	ENSG00000049192(ADAMTS6),ENSG00000078401(EDN1),ENSG00000105974(CAV1),ENSG00000113721(PDGFRB),ENSG00000120899(PTK2B),ENSG00000134215(VAV3),ENSG00000137440(FGFBP1),ENSG00000154096(THY1),ENSG00000164850(GPER1),ENSG00000186642(PDE2A)
