# Supplementary material for: Discovering the Mechanisms of Oleodaphnone as a Potential HIV Latency-Reversing Agent by Transcriptome Profiling
Source: MDPI journal article supplement (doi:10.3390/ijms24087357), 2023-04-16
Supplement: s1 [file Table S3 KEGG enrichment-review.xlsx]

## Sheet: 0h_vs_3h_Up
PathwayID	Pathway	Level1	Levwl2	list_number	total_number	Pvalue	FDR	Gene	URL
hsa04668	TNF signaling pathway	Environmental Information Processing	Signal transduction	25	112	1.80809e-15	4.88185e-13	ENSG00000125347(IRF1),ENSG00000171223(JUNB),ENSG00000146592(CREB5),ENSG00000136244(IL6),ENSG00000109320(NFKB1),ENSG00000177606(JUN),ENSG00000056558(TRAF1),ENSG00000184557(SOCS3),ENSG00000100906(NFKBIA),ENSG00000006062(MAP3K14),ENSG00000128342(LIF),ENSG00000090339(ICAM1),ENSG00000108691(CCL2),ENSG00000163734(CXCL3),ENSG00000115604(IL18R1),ENSG00000110330(BIRC2),ENSG00000069399(BCL3),ENSG0000002610…	http://www.kegg.jp/kegg-bin/show_pathway?map=map04668&multi_query=K04448+%23FFFFFF,red%0d%0aK04390+%23FFFFFF,red%0d%0aK14625+%23FFFFFF,red%0d%0aK05173+%23FFFFFF,red%0d%0aK05405+%23FFFFFF,red%0d%0aK06490+%23FFFFFF,red%0d%0aK16060+%23FFFFFF,red%0d%0aK04696+%23FFFFFF,red%0d%0aK04734+%23FFFFFF,red%0d%0aK09028+%23FFFFFF,red%0d%0aK04379+%23FFFFFF,red%0d%0aK04466+%23FFFFFF,red%0d%0aK03156+%23FFFFFF,red%…
hsa04625	C-type lectin receptor signaling pathway	Organismal Systems	Immune system	17	104	1.12991e-08	1.01692e-06	ENSG00000169885(CALML6),ENSG00000006062(MAP3K14),ENSG00000100906(NFKBIA),ENSG00000177606(JUN),ENSG00000109320(NFKB1),ENSG00000136244(IL6),ENSG00000187796(CARD9),ENSG00000122877(EGR2),ENSG00000125347(IRF1),ENSG00000232810(TNF),ENSG00000101096(NFATC2),ENSG00000077150(NFKB2),ENSG00000158869(FCER1G),ENSG00000173846(PLK3),ENSG00000104856(RELB),ENSG00000069399(BCL3),ENSG00000179388(EGR3)	http://www.kegg.jp/kegg-bin/show_pathway?map=map04625&multi_query=K04466+%23FFFFFF,red%0d%0aK04469+%23FFFFFF,red%0d%0aK12496+%23FFFFFF,red%0d%0aK02183+%23FFFFFF,red%0d%0aK09253+%23FFFFFF,red%0d%0aK07983+%23FFFFFF,red%0d%0aK04734+%23FFFFFF,red%0d%0aK04448+%23FFFFFF,red%0d%0aK12497+%23FFFFFF,red%0d%0aK17332+%23FFFFFF,red%0d%0aK09444+%23FFFFFF,red%0d%0aK12794+%23FFFFFF,red%0d%0aK02580+%23FFFFFF,red%…
hsa04064	NF-kappa B signaling pathway	Environmental Information Processing	Signal transduction	16	102	5.65713e-08	3.81856e-06	ENSG00000109320(NFKB1),ENSG00000056558(TRAF1),ENSG00000163734(CXCL3),ENSG00000127666(TICAM1),ENSG00000100906(NFKBIA),ENSG00000006062(MAP3K14),ENSG00000169429(CXCL8),ENSG00000090339(ICAM1),ENSG00000023445(BIRC3),ENSG00000104856(RELB),ENSG00000107201(DDX58),ENSG00000110330(BIRC2),ENSG00000232810(TNF),ENSG00000118503(TNFAIP3),ENSG00000077150(NFKB2),ENSG00000081041(CXCL2)	http://www.kegg.jp/kegg-bin/show_pathway?map=map04064&multi_query=K05505+%23FFFFFF,red%0d%0aK05842+%23FFFFFF,red%0d%0aK04466+%23FFFFFF,red%0d%0aK16060+%23FFFFFF,red%0d%0aK11859+%23FFFFFF,red%0d%0aK04734+%23FFFFFF,red%0d%0aK03156+%23FFFFFF,red%0d%0aK12646+%23FFFFFF,red%0d%0aK03172+%23FFFFFF,red%0d%0aK02580+%23FFFFFF,red%0d%0aK09253+%23FFFFFF,red%0d%0aK10030+%23FFFFFF,red%0d%0aK06490+%23FFFFFF,red%…
hsa04657	IL-17 signaling pathway	Organismal Systems	Immune system	15	94	1.17846e-07	6.36369e-06	ENSG00000232810(TNF),ENSG00000118503(TNFAIP3),ENSG00000081041(CXCL2),ENSG00000115009(CCL20),ENSG00000170345(FOS),ENSG00000175592(FOSL1),ENSG00000108688(CCL7),ENSG00000108691(CCL2),ENSG00000163734(CXCL3),ENSG00000100906(NFKBIA),ENSG00000169429(CXCL8),ENSG00000136244(IL6),ENSG00000109320(NFKB1),ENSG00000125740(FOSB),ENSG00000177606(JUN)	http://www.kegg.jp/kegg-bin/show_pathway?map=map04657&multi_query=K02580+%23FFFFFF,red%0d%0aK14624+%23FFFFFF,red%0d%0aK04734+%23FFFFFF,red%0d%0aK04502+%23FFFFFF,red%0d%0aK14625+%23FFFFFF,red%0d%0aK09029+%23FFFFFF,red%0d%0aK04379+%23FFFFFF,red%0d%0aK05509+%23FFFFFF,red%0d%0aK03156+%23FFFFFF,red%0d%0aK05505+%23FFFFFF,red%0d%0aK10030+%23FFFFFF,red%0d%0aK05405+%23FFFFFF,red%0d%0aK04448+%23FFFFFF,red%…
hsa04010	MAPK signaling pathway	Environmental Information Processing	Signal transduction	24	294	8.47925e-06	0.000176108	ENSG00000123358(NR4A1),ENSG00000177606(JUN),ENSG00000155903(RASA2),ENSG00000109320(NFKB1),ENSG00000120129(DUSP1),ENSG00000142627(EPHA2),ENSG00000006062(MAP3K14),ENSG00000158050(DUSP2),ENSG00000173110(HSPA6),ENSG00000104856(RELB),ENSG00000170345(FOS),ENSG00000109321(AREG),ENSG00000138166(DUSP5),ENSG00000120875(DUSP4),ENSG00000026103(FAS),ENSG00000139318(DUSP6),ENSG00000111266(DUSP16),ENSG000001466…	http://www.kegg.jp/kegg-bin/show_pathway?map=map04010&multi_query=K04465+%23FFFFFF,red%0d%0aK04361+%23FFFFFF,red%0d%0aK04466+%23FFFFFF,red%0d%0aK02580+%23FFFFFF,red%0d%0aK21278+%23FFFFFF,red%0d%0aK03156+%23FFFFFF,red%0d%0aK04432+%23FFFFFF,red%0d%0aK08053+%23FFFFFF,red%0d%0aK04383+%23FFFFFF,red%0d%0aK04379+%23FFFFFF,red%0d%0aK05462+%23FFFFFF,red%0d%0aK04390+%23FFFFFF,red%0d%0aK05103+%23FFFFFF,red%…
hsa04621	NOD-like receptor signaling pathway	Organismal Systems	Immune system	19	181	2.09308e-06	6.27923e-05	ENSG00000108691(CCL2),ENSG00000127666(TICAM1),ENSG00000163734(CXCL3),ENSG00000100906(NFKBIA),ENSG00000169429(CXCL8),ENSG00000139112(GABARAPL1),ENSG00000109320(NFKB1),ENSG00000136244(IL6),ENSG00000177606(JUN),ENSG00000187796(CARD9),ENSG00000196954(CASP4),ENSG00000117226(GBP3),ENSG00000232810(TNF),ENSG00000118503(TNFAIP3),ENSG00000105835(NAMPT),ENSG00000081041(CXCL2),ENSG00000110218(PANX1),ENSG0000…	http://www.kegg.jp/kegg-bin/show_pathway?map=map04621&multi_query=K11859+%23FFFFFF,red%0d%0aK05405+%23FFFFFF,red%0d%0aK05505+%23FFFFFF,red%0d%0aK14624+%23FFFFFF,red%0d%0aK12794+%23FFFFFF,red%0d%0aK02580+%23FFFFFF,red%0d%0aK16060+%23FFFFFF,red%0d%0aK03156+%23FFFFFF,red%0d%0aK20899+%23FFFFFF,red%0d%0aK03462+%23FFFFFF,red%0d%0aK08341+%23FFFFFF,red%0d%0aK04448+%23FFFFFF,red%0d%0aK04734+%23FFFFFF,red%…
hsa04630	JAK-STAT signaling pathway	Environmental Information Processing	Signal transduction	17	161	6.77291e-06	0.00015239	ENSG00000120833(SOCS2),ENSG00000027697(IFNGR1),ENSG00000136244(IL6),ENSG00000077238(IL4R),ENSG00000124762(CDKN1A),ENSG00000168685(IL7R),ENSG00000184557(SOCS3),ENSG00000081985(IL12RB2),ENSG00000113594(LIFR),ENSG00000126561(STAT5A),ENSG00000145777(TSLP),ENSG00000128342(LIF),ENSG00000185291(IL3RA),ENSG00000095752(IL11),ENSG00000146648(EGFR),ENSG00000143384(MCL1),ENSG00000184995(IFNE)	http://www.kegg.jp/kegg-bin/show_pathway?map=map04630&multi_query=K05417+%23FFFFFF,red%0d%0aK04696+%23FFFFFF,red%0d%0aK02539+%23FFFFFF,red%0d%0aK04737+%23FFFFFF,red%0d%0aK05072+%23FFFFFF,red%0d%0aK05071+%23FFFFFF,red%0d%0aK05419+%23FFFFFF,red%0d%0aK05058+%23FFFFFF,red%0d%0aK05442+%23FFFFFF,red%0d%0aK06625+%23FFFFFF,red%0d%0aK05436+%23FFFFFF,red%0d%0aK04695+%23FFFFFF,red%0d%0aK04361+%23FFFFFF,red%…
hsa04390	Hippo signaling pathway	Environmental Information Processing	Signal transduction	7	157	0.198723	0.454609	ENSG00000188064(WNT7B),ENSG00000125845(BMP2),ENSG00000109321(AREG),ENSG00000110330(BIRC2),ENSG00000023445(BIRC3),ENSG00000166949(SMAD3),ENSG00000153162(BMP6)	http://www.kegg.jp/kegg-bin/show_pathway?map=map04390&multi_query=K16060+%23FFFFFF,red%0d%0aK16620+%23FFFFFF,red%0d%0aK23605+%23FFFFFF,red%0d%0aK09782+%23FFFFFF,red%0d%0aK21283+%23FFFFFF,red%0d%0aK00572+%23FFFFFF,red%0d%0a
hsa04350	TGF-beta signaling pathway	Environmental Information Processing	Signal transduction	7	93	0.022388	0.0912366	ENSG00000134363(FST),ENSG00000153162(BMP6),ENSG00000177426(TGIF1),ENSG00000137801(THBS1),ENSG00000166949(SMAD3),ENSG00000232810(TNF),ENSG00000125845(BMP2)	http://www.kegg.jp/kegg-bin/show_pathway?map=map04350&multi_query=K16857+%23FFFFFF,red%0d%0aK16620+%23FFFFFF,red%0d%0aK21283+%23FFFFFF,red%0d%0aK23605+%23FFFFFF,red%0d%0aK03156+%23FFFFFF,red%0d%0aK04661+%23FFFFFF,red%0d%0aK19383+%23FFFFFF,red%0d%0a
hsa04068	FoxO signaling pathway	Environmental Information Processing	Signal transduction	11	129	0.00178828	0.0142011	ENSG00000146648(EGFR),ENSG00000166949(SMAD3),ENSG00000150907(FOXO1),ENSG00000173846(PLK3),ENSG00000112096(SOD2),ENSG00000139112(GABARAPL1),ENSG00000136244(IL6),ENSG00000162409(PRKAA2),ENSG00000168685(IL7R),ENSG00000124762(CDKN1A),ENSG00000118515(SGK1)	http://www.kegg.jp/kegg-bin/show_pathway?map=map04068&multi_query=K07201+%23FFFFFF,red%0d%0aK05405+%23FFFFFF,red%0d%0aK07198+%23FFFFFF,red%0d%0aK04361+%23FFFFFF,red%0d%0aK08862+%23FFFFFF,red%0d%0aK13302+%23FFFFFF,red%0d%0aK06625+%23FFFFFF,red%0d%0aK08341+%23FFFFFF,red%0d%0aK23605+%23FFFFFF,red%0d%0aK04564+%23FFFFFF,red%0d%0aK05072+%23FFFFFF,red%0d%0a
hsa04066	HIF-1 signaling pathway	Environmental Information Processing	Signal transduction	6	109	0.112809	0.320616	ENSG00000124762(CDKN1A),ENSG00000109320(NFKB1),ENSG00000027697(IFNGR1),ENSG00000136244(IL6),ENSG00000135766(EGLN1),ENSG00000146648(EGFR)	http://www.kegg.jp/kegg-bin/show_pathway?map=map04066&multi_query=K06625+%23FFFFFF,red%0d%0aK02580+%23FFFFFF,red%0d%0aK05405+%23FFFFFF,red%0d%0aK05132+%23FFFFFF,red%0d%0aK09592+%23FFFFFF,red%0d%0aK04361+%23FFFFFF,red%0d%0a
hsa04024	cAMP signaling pathway	Environmental Information Processing	Signal transduction	9	218	0.215939	0.47019	ENSG00000146592(CREB5),ENSG00000135346(CGA),ENSG00000109320(NFKB1),ENSG00000177606(JUN),ENSG00000100906(NFKBIA),ENSG00000169885(CALML6),ENSG00000170345(FOS),ENSG00000128271(ADORA2A),ENSG00000113448(PDE4D)	http://www.kegg.jp/kegg-bin/show_pathway?map=map04024&multi_query=K04266+%23FFFFFF,red%0d%0aK02580+%23FFFFFF,red%0d%0aK04734+%23FFFFFF,red%0d%0aK13293+%23FFFFFF,red%0d%0aK09047+%23FFFFFF,red%0d%0aK04379+%23FFFFFF,red%0d%0aK02183+%23FFFFFF,red%0d%0aK04448+%23FFFFFF,red%0d%0aK08522+%23FFFFFF,red%0d%0a
hsa04310	Wnt signaling pathway	Environmental Information Processing	Signal transduction	7	166	0.238328	0.510702	ENSG00000107984(DKK1),ENSG00000175592(FOSL1),ENSG00000166949(SMAD3),ENSG00000101096(NFATC2),ENSG00000185483(ROR1),ENSG00000177606(JUN),ENSG00000188064(WNT7B)	http://www.kegg.jp/kegg-bin/show_pathway?map=map04310&multi_query=K02165+%23FFFFFF,red%0d%0aK04502+%23FFFFFF,red%0d%0aK00572+%23FFFFFF,red%0d%0aK04448+%23FFFFFF,red%0d%0aK23605+%23FFFFFF,red%0d%0aK17332+%23FFFFFF,red%0d%0aK05122+%23FFFFFF,red%0d%0a
hsa04012	ErbB signaling pathway	Environmental Information Processing	Signal transduction	7	84	0.0134314	0.0705963	ENSG00000124762(CDKN1A),ENSG00000177606(JUN),ENSG00000113070(HBEGF),ENSG00000126561(STAT5A),ENSG00000109321(AREG),ENSG00000146648(EGFR),ENSG00000143322(ABL2)	http://www.kegg.jp/kegg-bin/show_pathway?map=map04012&multi_query=K08523+%23FFFFFF,red%0d%0aK04361+%23FFFFFF,red%0d%0aK11223+%23FFFFFF,red%0d%0aK06625+%23FFFFFF,red%0d%0aK08887+%23FFFFFF,red%0d%0aK04448+%23FFFFFF,red%0d%0aK09782+%23FFFFFF,red%0d%0a
hsa04620	Toll-like receptor signaling pathway	Organismal Systems	Immune system	9	101	0.0034204	0.022458	ENSG00000136244(IL6),ENSG00000109320(NFKB1),ENSG00000177606(JUN),ENSG00000100906(NFKBIA),ENSG00000169429(CXCL8),ENSG00000127666(TICAM1),ENSG00000170345(FOS),ENSG00000232810(TNF),ENSG00000034152(MAP2K3)	http://www.kegg.jp/kegg-bin/show_pathway?map=map04620&multi_query=K04432+%23FFFFFF,red%0d%0aK05842+%23FFFFFF,red%0d%0aK04734+%23FFFFFF,red%0d%0aK03156+%23FFFFFF,red%0d%0aK10030+%23FFFFFF,red%0d%0aK04448+%23FFFFFF,red%0d%0aK05405+%23FFFFFF,red%0d%0aK04379+%23FFFFFF,red%0d%0aK02580+%23FFFFFF,red%0d%0a

## Sheet: 0h_vs_3h_Down
PathwayID	Pathway	Level1	Level2	DEG_number	total_number	Pvalue	FDR	URL
hsa04668	TNF signaling pathway	Environmental Information Processing	Signal transduction	1	112	0.801949	0.975156	ENSG00000078401(EDN1)	http://www.kegg.jp/kegg-bin/show_pathway?map=map04668&multi_query=K16366+%23FFFFFF,red%0d%0a
hsa04010	MAPK signaling pathway	Environmental Information Processing	Signal transduction	4	294	0.608519	0.975156	ENSG00000099617(EFNA2),ENSG00000139625(MAP3K12),ENSG00000099875(MKNK2),ENSG00000101224(CDC25B)	http://www.kegg.jp/kegg-bin/show_pathway?map=map04010&multi_query=K04372+%23FFFFFF,red%0d%0aK05462+%23FFFFFF,red%0d%0aK05866+%23FFFFFF,red%0d%0aK04423+%23FFFFFF,red%0d%0a
hsa04621	NOD-like receptor signaling pathway	Organismal Systems	Immune system	1	181	0.927826	0.982785	ENSG00000265972(TXNIP)	http://www.kegg.jp/kegg-bin/show_pathway?map=map04621&multi_query=K20910+%23FFFFFF,red%0d%0a
hsa04630	JAK-STAT signaling pathway	Environmental Information Processing	Signal transduction	1	161	0.903203	0.975763	ENSG00000187266(EPOR)	http://www.kegg.jp/kegg-bin/show_pathway?map=map04630&multi_query=K05079+%23FFFFFF,red%0d%0a
hsa04390	Hippo signaling pathway	Environmental Information Processing	Signal transduction	9	157	0.000381931	0.0271171	ENSG00000115596(WNT6),ENSG00000085741(WNT11),ENSG00000125378(BMP4),ENSG00000174804(FZD4),ENSG00000082458(DLG3),ENSG00000180340(FZD2),ENSG00000129474(AJUBA),ENSG00000156466(GDF6),ENSG00000115738(ID2)	http://www.kegg.jp/kegg-bin/show_pathway?map=map04390&multi_query=K21098+%23FFFFFF,red%0d%0aK02235+%23FFFFFF,red%0d%0aK20012+%23FFFFFF,red%0d%0aK02354+%23FFFFFF,red%0d%0aK04662+%23FFFFFF,red%0d%0aK17693+%23FFFFFF,red%0d%0aK01384+%23FFFFFF,red%0d%0aK00445+%23FFFFFF,red%0d%0aK16682+%23FFFFFF,red%0d%0a
hsa04350	TGF-beta signaling pathway	Environmental Information Processing	Signal transduction	4	93	0.0433973	0.357221	ENSG00000183691(NOG),ENSG00000115738(ID2),ENSG00000156466(GDF6),ENSG00000125378(BMP4)	http://www.kegg.jp/kegg-bin/show_pathway?map=map04350&multi_query=K20012+%23FFFFFF,red%0d%0aK04658+%23FFFFFF,red%0d%0aK17693+%23FFFFFF,red%0d%0aK04662+%23FFFFFF,red%0d%0a
hsa04068	FoxO signaling pathway	Environmental Information Processing	Signal transduction	2	129	0.552268	0.975156	ENSG00000138764(CCNG2),ENSG00000103942(HOMER2)	http://www.kegg.jp/kegg-bin/show_pathway?map=map04068&multi_query=K15010+%23FFFFFF,red%0d%0aK10146+%23FFFFFF,red%0d%0a
hsa04066	HIF-1 signaling pathway	Environmental Information Processing	Signal transduction	4	109	0.069788	0.396396	ENSG00000078401(EDN1),ENSG00000129521(EGLN3),ENSG00000099875(MKNK2),ENSG00000100292(HMOX1)	http://www.kegg.jp/kegg-bin/show_pathway?map=map04066&multi_query=K09592+%23FFFFFF,red%0d%0aK16366+%23FFFFFF,red%0d%0aK00510+%23FFFFFF,red%0d%0aK04372+%23FFFFFF,red%0d%0a
hsa04024	cAMP signaling pathway	Environmental Information Processing	Signal transduction	7	218	0.0357754	0.317507	ENSG00000111087(GLI1),ENSG00000078401(EDN1),ENSG00000134215(VAV3),ENSG00000106018(VIPR2),ENSG00000163485(ADORA1),ENSG00000162009(SSTR5),ENSG00000185920(PTCH1)	http://www.kegg.jp/kegg-bin/show_pathway?map=map04024&multi_query=K04265+%23FFFFFF,red%0d%0aK06225+%23FFFFFF,red%0d%0aK04590+%23FFFFFF,red%0d%0aK16797+%23FFFFFF,red%0d%0aK04221+%23FFFFFF,red%0d%0aK05730+%23FFFFFF,red%0d%0aK16366+%23FFFFFF,red%0d%0a
hsa04310	Wnt signaling pathway	Environmental Information Processing	Signal transduction	6	166	0.0309438	0.292935	ENSG00000180340(FZD2),ENSG00000174804(FZD4),ENSG00000169071(ROR2),ENSG00000115596(WNT6),ENSG00000085741(WNT11),ENSG00000108375(RNF43)	http://www.kegg.jp/kegg-bin/show_pathway?map=map04310&multi_query=K00445+%23FFFFFF,red%0d%0aK15694+%23FFFFFF,red%0d%0aK01384+%23FFFFFF,red%0d%0aK02235+%23FFFFFF,red%0d%0aK05123+%23FFFFFF,red%0d%0aK02354+%23FFFFFF,red%0d%0a
hsa04012	ErbB signaling pathway	Environmental Information Processing	Signal transduction	1	84	0.702459	0.975156	ENSG00000169752(NRG4)	http://www.kegg.jp/kegg-bin/show_pathway?map=map04012&multi_query=K05458+%23FFFFFF,red%0d%0a

## Sheet: 0h_vs_3h
PathwayID	Pathway	Level1	Level2	DEG_number	total_number	Pvalue	FDR	URL
hsa04668	TNF signaling pathway	Environmental Information Processing	Signal transduction	26	112	1.26211e-12	3.58439e-10	http://www.kegg.jp/kegg-bin/show_pathway?map04668/K05405%09%23FFFFFF,red/K14624%09%23FFFFFF,red/K11859%09%23FFFFFF,red/K04696%09%23FFFFFF,red/K09028%09%23FFFFFF,red/K09258%09%23FFFFFF,red/K03156%09%23FFFFFF,red/K04466%09%23FFFFFF,red/K04734%09%23FFFFFF,red/K02580%09%23FFFFFF,red/K04432%09%23FFFFFF,red/K03172%09%23FFFFFF,red/K09444%09%23FFFFFF,red/K05505%09%23FFFFFF,red/K16366%09%23FFFFFF,green/K1…
hsa04625	C-type lectin receptor signaling pathway	Organismal Systems	Immune system	17	104	2.14149e-06	0.000152046	http://www.kegg.jp/kegg-bin/show_pathway?map04625/K12497%09%23FFFFFF,red/K09444%09%23FFFFFF,red/K09258%09%23FFFFFF,red/K04734%09%23FFFFFF,red/K02183%09%23FFFFFF,red/K03156%09%23FFFFFF,red/K12496%09%23FFFFFF,red/K04466%09%23FFFFFF,red/K17332%09%23FFFFFF,red/K05405%09%23FFFFFF,red/K04469%09%23FFFFFF,red/K09253%09%23FFFFFF,red/K02580%09%23FFFFFF,red/K08862%09%23FFFFFF,red/K12794%09%23FFFFFF,red/K044…
hsa04064	NF-kappa B signaling pathway	Environmental Information Processing	Signal transduction	16	102	7.36274e-06	0.000411291	http://www.kegg.jp/kegg-bin/show_pathway?map04064/K04466%09%23FFFFFF,red/K03156%09%23FFFFFF,red/K06490%09%23FFFFFF,red/K11859%09%23FFFFFF,red/K05842%09%23FFFFFF,red/K12646%09%23FFFFFF,red/K09253%09%23FFFFFF,red/K04734%09%23FFFFFF,red/K02580%09%23FFFFFF,red/K16060%09%23FFFFFF,red/K04469%09%23FFFFFF,red/K03172%09%23FFFFFF,red/K05505%09%23FFFFFF,red/K10030%09%23FFFFFF,red/
hsa04657	IL-17 signaling pathway	Organismal Systems	Immune system	15	94	1.14243e-05	0.000463499	http://www.kegg.jp/kegg-bin/show_pathway?map04657/K05505%09%23FFFFFF,red/K05405%09%23FFFFFF,red/K10030%09%23FFFFFF,red/K14624%09%23FFFFFF,red/K14625%09%23FFFFFF,red/K04734%09%23FFFFFF,red/K04502%09%23FFFFFF,red/K03156%09%23FFFFFF,red/K11859%09%23FFFFFF,red/K05509%09%23FFFFFF,red/K04379%09%23FFFFFF,red/K04448%09%23FFFFFF,red/K02580%09%23FFFFFF,red/K09029%09%23FFFFFF,red/
hsa04010	MAPK signaling pathway	Environmental Information Processing	Signal transduction	28	294	7.84691e-05	0.00206731	http://www.kegg.jp/kegg-bin/show_pathway?map04010/K09253%09%23FFFFFF,red/K04390%09%23FFFFFF,red/K04379%09%23FFFFFF,red/K04361%09%23FFFFFF,red/K04448%09%23FFFFFF,red/K02580%09%23FFFFFF,red/K04372%09%23FFFFFF,green/K05103%09%23FFFFFF,red/K04469%09%23FFFFFF,red/K04423%09%23FFFFFF,green/K21946%09%23FFFFFF,red/K05866%09%23FFFFFF,green/K03283%09%23FFFFFF,red/K21278%09%23FFFFFF,red/K04465%09%23FFFFFF,re…
hsa04621	NOD-like receptor signaling pathway	Organismal Systems	Immune system	20	181	0.000112186	0.00245082	http://www.kegg.jp/kegg-bin/show_pathway?map04621/K04394%09%23FFFFFF,red/K03156%09%23FFFFFF,red/K20910%09%23FFFFFF,green/K05842%09%23FFFFFF,red/K05405%09%23FFFFFF,red/K11859%09%23FFFFFF,red/K14624%09%23FFFFFF,red/K02580%09%23FFFFFF,red/K04448%09%23FFFFFF,red/K16060%09%23FFFFFF,red/K08341%09%23FFFFFF,red/K04734%09%23FFFFFF,red/K03443%09%23FFFFFF,red/K12794%09%23FFFFFF,red/K10030%09%23FFFFFF,red/K2…
hsa04630	JAK-STAT signaling pathway	Environmental Information Processing	Signal transduction	18	161	0.000210087	0.00389012	http://www.kegg.jp/kegg-bin/show_pathway?map04630/K04696%09%23FFFFFF,red/K05419%09%23FFFFFF,red/K02539%09%23FFFFFF,red/K05064%09%23FFFFFF,red/K05417%09%23FFFFFF,red/K05442%09%23FFFFFF,red/K05058%09%23FFFFFF,red/K04361%09%23FFFFFF,red/K05071%09%23FFFFFF,red/K06625%09%23FFFFFF,red/K05132%09%23FFFFFF,red/K05072%09%23FFFFFF,red/K11223%09%23FFFFFF,red/K04695%09%23FFFFFF,red/K05079%09%23FFFFFF,green/K0…
hsa04390	Hippo signaling pathway	Environmental Information Processing	Signal transduction	16	157	0.00127347	0.0129166	http://www.kegg.jp/kegg-bin/show_pathway?map04390/K04662%09%23FFFFFF,green/K16620%09%23FFFFFF,red/K23605%09%23FFFFFF,red/K20012%09%23FFFFFF,green/K21283%09%23FFFFFF,red/K16682%09%23FFFFFF,green/K09782%09%23FFFFFF,red/K00445%09%23FFFFFF,green/K02235%09%23FFFFFF,green/K00572%09%23FFFFFF,red/K01384%09%23FFFFFF,green/K16060%09%23FFFFFF,red/K02354%09%23FFFFFF,green/K21098%09%23FFFFFF,green/K17693%09%2…
hsa04350	TGF-beta signaling pathway	Environmental Information Processing	Signal transduction	11	93	0.00220759	0.0208986	http://www.kegg.jp/kegg-bin/show_pathway?map04350/K21283%09%23FFFFFF,red/K03156%09%23FFFFFF,red/K16857%09%23FFFFFF,red/K23605%09%23FFFFFF,red/K20012%09%23FFFFFF,green/K04662%09%23FFFFFF,green/K04661%09%23FFFFFF,red/K04658%09%23FFFFFF,green/K19383%09%23FFFFFF,red/K17693%09%23FFFFFF,green/K16620%09%23FFFFFF,red/
hsa04068	FoxO signaling pathway	Environmental Information Processing	Signal transduction	13	129	0.00386819	0.0326668	http://www.kegg.jp/kegg-bin/show_pathway?map04068/K07198%09%23FFFFFF,red/K05405%09%23FFFFFF,red/K04564%09%23FFFFFF,red/K06625%09%23FFFFFF,red/K13302%09%23FFFFFF,red/K08341%09%23FFFFFF,red/K10146%09%23FFFFFF,green/K15010%09%23FFFFFF,green/K08862%09%23FFFFFF,red/K05072%09%23FFFFFF,red/K23605%09%23FFFFFF,red/K07201%09%23FFFFFF,red/K04361%09%23FFFFFF,red/
hsa04066	HIF-1 signaling pathway	Environmental Information Processing	Signal transduction	10	109	0.0195542	0.113335	http://www.kegg.jp/kegg-bin/show_pathway?map04066/K05132%09%23FFFFFF,red/K00510%09%23FFFFFF,green/K02580%09%23FFFFFF,red/K16366%09%23FFFFFF,green/K09592%09%23FFFFFF,purple/K05405%09%23FFFFFF,red/K04372%09%23FFFFFF,green/K04361%09%23FFFFFF,red/K06625%09%23FFFFFF,red/
hsa04024	cAMP signaling pathway	Environmental Information Processing	Signal transduction	16	218	0.0275383	0.142198	http://www.kegg.jp/kegg-bin/show_pathway?map04024/K16366%09%23FFFFFF,green/K04266%09%23FFFFFF,red/K13293%09%23FFFFFF,red/K02183%09%23FFFFFF,red/K04734%09%23FFFFFF,red/K04448%09%23FFFFFF,red/K05730%09%23FFFFFF,green/K04590%09%23FFFFFF,green/K08522%09%23FFFFFF,red/K06225%09%23FFFFFF,green/K04379%09%23FFFFFF,red/K16797%09%23FFFFFF,green/K02580%09%23FFFFFF,red/K04221%09%23FFFFFF,green/K04265%09%23FFF…
hsa04310	Wnt signaling pathway	Environmental Information Processing	Signal transduction	13	166	0.0281359	0.14244	http://www.kegg.jp/kegg-bin/show_pathway?map04310/K00445%09%23FFFFFF,green/K02354%09%23FFFFFF,green/K04502%09%23FFFFFF,red/K17332%09%23FFFFFF,red/K00572%09%23FFFFFF,red/K02235%09%23FFFFFF,green/K05122%09%23FFFFFF,red/K01384%09%23FFFFFF,green/K15694%09%23FFFFFF,green/K04448%09%23FFFFFF,red/K05123%09%23FFFFFF,green/K02165%09%23FFFFFF,red/K23605%09%23FFFFFF,red/
hsa04012	ErbB signaling pathway	Environmental Information Processing	Signal transduction	8	84	0.0285884	0.14244	http://www.kegg.jp/kegg-bin/show_pathway?map04012/K04448%09%23FFFFFF,red/K06625%09%23FFFFFF,red/K11223%09%23FFFFFF,red/K08887%09%23FFFFFF,red/K04361%09%23FFFFFF,red/K05458%09%23FFFFFF,green/K08523%09%23FFFFFF,red/K09782%09%23FFFFFF,red/
hsa04620	Toll-like receptor signaling pathway	Organismal Systems	Immune system	9	101	0.0306566	0.145202	http://www.kegg.jp/kegg-bin/show_pathway?map04620/K04734%09%23FFFFFF,red/K03156%09%23FFFFFF,red/K04379%09%23FFFFFF,red/K05405%09%23FFFFFF,red/K04448%09%23FFFFFF,red/K04432%09%23FFFFFF,red/K02580%09%23FFFFFF,red/K10030%09%23FFFFFF,red/K05842%09%23FFFFFF,red/

## Sheet: 0h_vs_6h_Up
PathwayID	Pathway	Level1	Levwl2	list_number	total_number	Pvalue	FDR	Gene	URL
hsa04668	TNF signaling pathway	Environmental Information Processing	Signal transduction	26	112	7.18774e-17	1.92631e-14	ENSG00000162692(VCAM1),ENSG00000109320(NFKB1),ENSG00000115009(CCL20),ENSG00000171223(JUNB),ENSG00000056558(TRAF1),ENSG00000136244(IL6),ENSG00000069399(BCL3),ENSG00000081041(CXCL2),ENSG00000146592(CREB5),ENSG00000163734(CXCL3),ENSG00000169245(CXCL10),ENSG00000170345(FOS),ENSG00000034152(MAP2K3),ENSG00000128342(LIF),ENSG00000184557(SOCS3),ENSG00000090339(ICAM1),ENSG00000232810(TNF),ENSG00000100906(…	http://www.kegg.jp/kegg-bin/show_pathway?map=map04668&multi_query=K09444+%23FFFFFF,red%0d%0aK09028+%23FFFFFF,red%0d%0aK09047+%23FFFFFF,red%0d%0aK03156+%23FFFFFF,red%0d%0aK06527+%23FFFFFF,red%0d%0aK04432+%23FFFFFF,red%0d%0aK09258+%23FFFFFF,red%0d%0aK06490+%23FFFFFF,red%0d%0aK12671+%23FFFFFF,red%0d%0aK16060+%23FFFFFF,red%0d%0aK02580+%23FFFFFF,red%0d%0aK14624+%23FFFFFF,red%0d%0aK04379+%23FFFFFF,red%…
hsa04625	C-type lectin receptor signaling pathway	Organismal Systems	Immune system	12	104	4.74165e-05	0.00115524	ENSG00000109320(NFKB1),ENSG00000122877(EGR2),ENSG00000077150(NFKB2),ENSG00000187796(CARD9),ENSG00000136244(IL6),ENSG00000069399(BCL3),ENSG00000158869(FCER1G),ENSG00000173846(PLK3),ENSG00000104856(RELB),ENSG00000125347(IRF1),ENSG00000100906(NFKBIA),ENSG00000232810(TNF)	http://www.kegg.jp/kegg-bin/show_pathway?map=map04625&multi_query=K04734+%23FFFFFF,red%0d%0aK08862+%23FFFFFF,red%0d%0aK02580+%23FFFFFF,red%0d%0aK09253+%23FFFFFF,red%0d%0aK05405+%23FFFFFF,red%0d%0aK09444+%23FFFFFF,red%0d%0aK12496+%23FFFFFF,red%0d%0aK12794+%23FFFFFF,red%0d%0aK09258+%23FFFFFF,red%0d%0aK03156+%23FFFFFF,red%0d%0aK04469+%23FFFFFF,red%0d%0aK07983+%23FFFFFF,red%0d%0a
hsa04064	NF-kappa B signaling pathway	Environmental Information Processing	Signal transduction	15	102	2.27691e-07	1.52553e-05	ENSG00000056558(TRAF1),ENSG00000109320(NFKB1),ENSG00000162692(VCAM1),ENSG00000127666(TICAM1),ENSG00000077150(NFKB2),ENSG00000169429(CXCL8),ENSG00000090339(ICAM1),ENSG00000081041(CXCL2),ENSG00000163734(CXCL3),ENSG00000023445(BIRC3),ENSG00000232810(TNF),ENSG00000100906(NFKBIA),ENSG00000118503(TNFAIP3),ENSG00000104856(RELB),ENSG00000110330(BIRC2)	http://www.kegg.jp/kegg-bin/show_pathway?map=map04064&multi_query=K04469+%23FFFFFF,red%0d%0aK03172+%23FFFFFF,red%0d%0aK10030+%23FFFFFF,red%0d%0aK09253+%23FFFFFF,red%0d%0aK04734+%23FFFFFF,red%0d%0aK02580+%23FFFFFF,red%0d%0aK05842+%23FFFFFF,red%0d%0aK05505+%23FFFFFF,red%0d%0aK16060+%23FFFFFF,red%0d%0aK06527+%23FFFFFF,red%0d%0aK11859+%23FFFFFF,red%0d%0aK06490+%23FFFFFF,red%0d%0aK03156+%23FFFFFF,red%…
hsa04657	IL-17 signaling pathway	Organismal Systems	Immune system	16	94	1.0377e-08	9.27015e-07	ENSG00000136244(IL6),ENSG00000175592(FOSL1),ENSG00000125740(FOSB),ENSG00000109320(NFKB1),ENSG00000108688(CCL7),ENSG00000115009(CCL20),ENSG00000118503(TNFAIP3),ENSG00000215182(MUC5AC),ENSG00000232810(TNF),ENSG00000100906(NFKBIA),ENSG00000108691(CCL2),ENSG00000169245(CXCL10),ENSG00000163734(CXCL3),ENSG00000081041(CXCL2),ENSG00000170345(FOS),ENSG00000169429(CXCL8)	http://www.kegg.jp/kegg-bin/show_pathway?map=map04657&multi_query=K02580+%23FFFFFF,red%0d%0aK11859+%23FFFFFF,red%0d%0aK14624+%23FFFFFF,red%0d%0aK04502+%23FFFFFF,red%0d%0aK04379+%23FFFFFF,red%0d%0aK03156+%23FFFFFF,red%0d%0aK04734+%23FFFFFF,red%0d%0aK05509+%23FFFFFF,red%0d%0aK14625+%23FFFFFF,red%0d%0aK21125+%23FFFFFF,red%0d%0aK05505+%23FFFFFF,red%0d%0aK12671+%23FFFFFF,red%0d%0aK10030+%23FFFFFF,red%…
hsa04010	MAPK signaling pathway	Environmental Information Processing	Signal transduction	24	294	4.66565e-06	0.000178628	ENSG00000232810(TNF),ENSG00000104856(RELB),ENSG00000120875(DUSP4),ENSG00000143507(DUSP10),ENSG00000155903(RASA2),ENSG00000146648(EGFR),ENSG00000109321(AREG),ENSG00000111266(DUSP16),ENSG00000120129(DUSP1),ENSG00000026103(FAS),ENSG00000105499(PLA2G4C),ENSG00000153233(PTPRR),ENSG00000170345(FOS),ENSG00000034152(MAP2K3),ENSG00000138166(DUSP5),ENSG00000142627(EPHA2),ENSG00000173110(HSPA6),ENSG00000077…	http://www.kegg.jp/kegg-bin/show_pathway?map=map04010&multi_query=K16342+%23FFFFFF,red%0d%0aK04379+%23FFFFFF,red%0d%0aK04469+%23FFFFFF,red%0d%0aK04723+%23FFFFFF,red%0d%0aK08053+%23FFFFFF,red%0d%0aK04390+%23FFFFFF,red%0d%0aK04458+%23FFFFFF,red%0d%0aK04432+%23FFFFFF,red%0d%0aK02580+%23FFFFFF,red%0d%0aK04465+%23FFFFFF,red%0d%0aK03283+%23FFFFFF,red%0d%0aK04459+%23FFFFFF,red%0d%0aK18497+%23FFFFFF,red%…
hsa04621	NOD-like receptor signaling pathway	Organismal Systems	Immune system	19	181	1.24434e-06	5.55803e-05	ENSG00000103313(MEFV),ENSG00000109320(NFKB1),ENSG00000105835(NAMPT),ENSG00000196954(CASP4),ENSG00000110218(PANX1),ENSG00000117226(GBP3),ENSG00000127666(TICAM1),ENSG00000187796(CARD9),ENSG00000136244(IL6),ENSG00000139112(GABARAPL1),ENSG00000081041(CXCL2),ENSG00000163734(CXCL3),ENSG00000169429(CXCL8),ENSG00000232810(TNF),ENSG00000100906(NFKBIA),ENSG00000110330(BIRC2),ENSG00000118503(TNFAIP3),ENSG00…	http://www.kegg.jp/kegg-bin/show_pathway?map=map04621&multi_query=K05405+%23FFFFFF,red%0d%0aK05842+%23FFFFFF,red%0d%0aK03443+%23FFFFFF,red%0d%0aK14624+%23FFFFFF,red%0d%0aK11859+%23FFFFFF,red%0d%0aK04394+%23FFFFFF,red%0d%0aK12794+%23FFFFFF,red%0d%0aK12803+%23FFFFFF,red%0d%0aK02580+%23FFFFFF,red%0d%0aK16060+%23FFFFFF,red%0d%0aK04734+%23FFFFFF,red%0d%0aK03156+%23FFFFFF,red%0d%0aK20899+%23FFFFFF,red%…
hsa04630	JAK-STAT signaling pathway	Environmental Information Processing	Signal transduction	18	161	9.51443e-07	5.09973e-05	ENSG00000113594(LIFR),ENSG00000168685(IL7R),ENSG00000120833(SOCS2),ENSG00000185291(IL3RA),ENSG00000128342(LIF),ENSG00000184557(SOCS3),ENSG00000146648(EGFR),ENSG00000143384(MCL1),ENSG00000095752(IL11),ENSG00000145623(OSMR),ENSG00000077238(IL4R),ENSG00000124762(CDKN1A),ENSG00000134352(IL6ST),ENSG00000104998(IL27RA),ENSG00000184995(IFNE),ENSG00000145777(TSLP),ENSG00000027697(IFNGR1),ENSG00000136244(…	http://www.kegg.jp/kegg-bin/show_pathway?map=map04630&multi_query=K05417+%23FFFFFF,red%0d%0aK05058+%23FFFFFF,red%0d%0aK05057+%23FFFFFF,red%0d%0aK04695+%23FFFFFF,red%0d%0aK05132+%23FFFFFF,red%0d%0aK05419+%23FFFFFF,red%0d%0aK04696+%23FFFFFF,red%0d%0aK05072+%23FFFFFF,red%0d%0aK06625+%23FFFFFF,red%0d%0aK04737+%23FFFFFF,red%0d%0aK19598+%23FFFFFF,red%0d%0aK05071+%23FFFFFF,red%0d%0aK04361+%23FFFFFF,red%…
hsa04390	Hippo signaling pathway	Environmental Information Processing	Signal transduction	9	157	0.0406841	0.167744	ENSG00000023445(BIRC3),ENSG00000125845(BMP2),ENSG00000109321(AREG),ENSG00000188064(WNT7B),ENSG00000110330(BIRC2),ENSG00000166949(SMAD3),ENSG00000139926(FRMD6),ENSG00000153162(BMP6),ENSG00000118523(CCN2)	http://www.kegg.jp/kegg-bin/show_pathway?map=map04390&multi_query=K09782+%23FFFFFF,red%0d%0aK00572+%23FFFFFF,red%0d%0aK21283+%23FFFFFF,red%0d%0aK16620+%23FFFFFF,red%0d%0aK23605+%23FFFFFF,red%0d%0aK06827+%23FFFFFF,red%0d%0aK16060+%23FFFFFF,red%0d%0aK16822+%23FFFFFF,red%0d%0a
hsa04350	TGF-beta signaling pathway	Environmental Information Processing	Signal transduction	6	93	0.0546691	0.20349	ENSG00000166949(SMAD3),ENSG00000134363(FST),ENSG00000125845(BMP2),ENSG00000137801(THBS1),ENSG00000153162(BMP6),ENSG00000232810(TNF)	http://www.kegg.jp/kegg-bin/show_pathway?map=map04350&multi_query=K04661+%23FFFFFF,red%0d%0aK21283+%23FFFFFF,red%0d%0aK23605+%23FFFFFF,red%0d%0aK03156+%23FFFFFF,red%0d%0aK16857+%23FFFFFF,red%0d%0aK16620+%23FFFFFF,red%0d%0a
hsa04068	FoxO signaling pathway	Environmental Information Processing	Signal transduction	9	129	0.0132111	0.0737619	ENSG00000146648(EGFR),ENSG00000112096(SOD2),ENSG00000118515(SGK1),ENSG00000173846(PLK3),ENSG00000168685(IL7R),ENSG00000136244(IL6),ENSG00000139112(GABARAPL1),ENSG00000166949(SMAD3),ENSG00000124762(CDKN1A)	http://www.kegg.jp/kegg-bin/show_pathway?map=map04068&multi_query=K04564+%23FFFFFF,red%0d%0aK08862+%23FFFFFF,red%0d%0aK05072+%23FFFFFF,red%0d%0aK23605+%23FFFFFF,red%0d%0aK08341+%23FFFFFF,red%0d%0aK04361+%23FFFFFF,red%0d%0aK05405+%23FFFFFF,red%0d%0aK06625+%23FFFFFF,red%0d%0aK13302+%23FFFFFF,red%0d%0a
hsa04066	HIF-1 signaling pathway	Environmental Information Processing	Signal transduction	7	109	0.0403923	0.167744	ENSG00000146648(EGFR),ENSG00000136244(IL6),ENSG00000135766(EGLN1),ENSG00000027697(IFNGR1),ENSG00000156510(HKDC1),ENSG00000109320(NFKB1),ENSG00000124762(CDKN1A)	http://www.kegg.jp/kegg-bin/show_pathway?map=map04066&multi_query=K00844+%23FFFFFF,red%0d%0aK05405+%23FFFFFF,red%0d%0aK05132+%23FFFFFF,red%0d%0aK06625+%23FFFFFF,red%0d%0aK09592+%23FFFFFF,red%0d%0aK04361+%23FFFFFF,red%0d%0aK02580+%23FFFFFF,red%0d%0a
hsa04024	cAMP signaling pathway	Environmental Information Processing	Signal transduction	9	218	0.188987	0.425617	ENSG00000116032(GRIN3B),ENSG00000109320(NFKB1),ENSG00000079337(RAPGEF3),ENSG00000146592(CREB5),ENSG00000128271(ADORA2A),ENSG00000170345(FOS),ENSG00000100906(NFKBIA),ENSG00000135346(CGA),ENSG00000113448(PDE4D)	http://www.kegg.jp/kegg-bin/show_pathway?map=map04024&multi_query=K05214+%23FFFFFF,red%0d%0aK04266+%23FFFFFF,red%0d%0aK09047+%23FFFFFF,red%0d%0aK08522+%23FFFFFF,red%0d%0aK02580+%23FFFFFF,red%0d%0aK04379+%23FFFFFF,red%0d%0aK04734+%23FFFFFF,red%0d%0aK13293+%23FFFFFF,red%0d%0aK08014+%23FFFFFF,red%0d%0a
hsa04310	Wnt signaling pathway	Environmental Information Processing	Signal transduction	4	166	0.721691	0.905591	ENSG00000175592(FOSL1),ENSG00000166949(SMAD3),ENSG00000107984(DKK1),ENSG00000188064(WNT7B)	http://www.kegg.jp/kegg-bin/show_pathway?map=map04310&multi_query=K23605+%23FFFFFF,red%0d%0aK00572+%23FFFFFF,red%0d%0aK04502+%23FFFFFF,red%0d%0aK02165+%23FFFFFF,red%0d%0a
hsa04012	ErbB signaling pathway	Environmental Information Processing	Signal transduction	4	84	0.231265	0.488023	ENSG00000124762(CDKN1A),ENSG00000113070(HBEGF),ENSG00000146648(EGFR),ENSG00000109321(AREG)	http://www.kegg.jp/kegg-bin/show_pathway?map=map04012&multi_query=K09782+%23FFFFFF,red%0d%0aK04361+%23FFFFFF,red%0d%0aK06625+%23FFFFFF,red%0d%0aK08523+%23FFFFFF,red%0d%0a
hsa04620	Toll-like receptor signaling pathway	Organismal Systems	Immune system	9	101	0.00271581	0.0202177	ENSG00000232810(TNF),ENSG00000100906(NFKBIA),ENSG00000169245(CXCL10),ENSG00000170345(FOS),ENSG00000169429(CXCL8),ENSG00000034152(MAP2K3),ENSG00000127666(TICAM1),ENSG00000136244(IL6),ENSG00000109320(NFKB1)	http://www.kegg.jp/kegg-bin/show_pathway?map=map04620&multi_query=K05405+%23FFFFFF,red%0d%0aK05842+%23FFFFFF,red%0d%0aK04734+%23FFFFFF,red%0d%0aK04379+%23FFFFFF,red%0d%0aK10030+%23FFFFFF,red%0d%0aK12671+%23FFFFFF,red%0d%0aK03156+%23FFFFFF,red%0d%0aK02580+%23FFFFFF,red%0d%0aK04432+%23FFFFFF,red%0d%0a

## Sheet: 0h_vs_6h_Down
PathwayID	Pathway	Level1	Levwl2	list_number	total_number	Pvalue	FDR	Gene	URL
hsa04668	TNF signaling pathway	Environmental Information Processing	Signal transduction	2	112	0.594065	0.917013	ENSG00000108984(MAP2K6),ENSG00000109339(MAPK10)	http://www.kegg.jp/kegg-bin/show_pathway?map=map04668&multi_query=K04433+%23FFFFFF,red%0d%0aK04440+%23FFFFFF,red%0d%0a
hsa04625	C-type lectin receptor signaling pathway	Organismal Systems	Immune system	1	104	0.846128	0.953967	ENSG00000109339(MAPK10)	http://www.kegg.jp/kegg-bin/show_pathway?map=map04625&multi_query=K04440+%23FFFFFF,red%0d%0a
hsa04657	IL-17 signaling pathway	Organismal Systems	Immune system	1	94	0.815584	0.94893	ENSG00000109339(MAPK10)	http://www.kegg.jp/kegg-bin/show_pathway?map=map04657&multi_query=K04440+%23FFFFFF,red%0d%0a
hsa04010	MAPK signaling pathway	Environmental Information Processing	Signal transduction	7	294	0.265454	0.917013	ENSG00000108984(MAP2K6),ENSG00000182389(CACNB4),ENSG00000113721(PDGFRB),ENSG00000065361(ERBB3),ENSG00000109339(MAPK10),ENSG00000008735(MAPK8IP2),ENSG00000196557(CACNA1H)	http://www.kegg.jp/kegg-bin/show_pathway?map=map04010&multi_query=K04435+%23FFFFFF,red%0d%0aK04440+%23FFFFFF,red%0d%0aK05089+%23FFFFFF,red%0d%0aK04855+%23FFFFFF,red%0d%0aK04433+%23FFFFFF,red%0d%0aK04865+%23FFFFFF,red%0d%0aK05084+%23FFFFFF,red%0d%0a
hsa04621	NOD-like receptor signaling pathway	Organismal Systems	Immune system	2	181	0.835568	0.94893	ENSG00000109339(MAPK10),ENSG00000265972(TXNIP)	http://www.kegg.jp/kegg-bin/show_pathway?map=map04621&multi_query=K20910+%23FFFFFF,red%0d%0aK04440+%23FFFFFF,red%0d%0a
hsa04630	JAK-STAT signaling pathway	Environmental Information Processing	Signal transduction	2	161	0.783584	0.94893	ENSG00000138356(AOX1),ENSG00000113721(PDGFRB)	http://www.kegg.jp/kegg-bin/show_pathway?map=map04630&multi_query=K00157+%23FFFFFF,red%0d%0aK05089+%23FFFFFF,red%0d%0a
hsa04390	Hippo signaling pathway	Environmental Information Processing	Signal transduction	6	157	0.0598858	0.688687	ENSG00000115596(WNT6),ENSG00000125378(BMP4),ENSG00000082458(DLG3),ENSG00000078900(TP73),ENSG00000115738(ID2),ENSG00000180340(FZD2)	http://www.kegg.jp/kegg-bin/show_pathway?map=map04390&multi_query=K10148+%23FFFFFF,red%0d%0aK17693+%23FFFFFF,red%0d%0aK21098+%23FFFFFF,red%0d%0aK04662+%23FFFFFF,red%0d%0aK02235+%23FFFFFF,red%0d%0aK00445+%23FFFFFF,red%0d%0a
hsa04350	TGF-beta signaling pathway	Environmental Information Processing	Signal transduction	2	93	0.49339	0.917013	ENSG00000125378(BMP4),ENSG00000115738(ID2)	http://www.kegg.jp/kegg-bin/show_pathway?map=map04350&multi_query=K04662+%23FFFFFF,red%0d%0aK17693+%23FFFFFF,red%0d%0a
hsa04068	FoxO signaling pathway	Environmental Information Processing	Signal transduction	1	129	0.902251	0.978193	ENSG00000109339(MAPK10)	http://www.kegg.jp/kegg-bin/show_pathway?map=map04068&multi_query=K04440+%23FFFFFF,red%0d%0a
hsa04066	HIF-1 signaling pathway	Environmental Information Processing	Signal transduction	1	109	0.859459	0.964271	ENSG00000111674(ENO2)	http://www.kegg.jp/kegg-bin/show_pathway?map=map04066&multi_query=K01689+%23FFFFFF,red%0d%0a
hsa04024	cAMP signaling pathway	Environmental Information Processing	Signal transduction	9	218	0.0151674	0.577314	ENSG00000162009(SSTR5),ENSG00000075651(PLD1),ENSG00000163485(ADORA1),ENSG00000121281(ADCY7),ENSG00000106018(VIPR2),ENSG00000109339(MAPK10),ENSG00000165409(TSHR),ENSG00000127129(EDN2),ENSG00000134215(VAV3)	http://www.kegg.jp/kegg-bin/show_pathway?map=map04024&multi_query=K04265+%23FFFFFF,red%0d%0aK08047+%23FFFFFF,red%0d%0aK01115+%23FFFFFF,red%0d%0aK04590+%23FFFFFF,red%0d%0aK04221+%23FFFFFF,red%0d%0aK04249+%23FFFFFF,red%0d%0aK05730+%23FFFFFF,red%0d%0aK16367+%23FFFFFF,red%0d%0aK04440+%23FFFFFF,red%0d%0a
hsa04310	Wnt signaling pathway	Environmental Information Processing	Signal transduction	5	166	0.171435	0.91698	ENSG00000115596(WNT6),ENSG00000169071(ROR2),ENSG00000109339(MAPK10),ENSG00000108375(RNF43),ENSG00000180340(FZD2)	http://www.kegg.jp/kegg-bin/show_pathway?map=map04310&multi_query=K15694+%23FFFFFF,red%0d%0aK05123+%23FFFFFF,red%0d%0aK04440+%23FFFFFF,red%0d%0aK02235+%23FFFFFF,red%0d%0aK00445+%23FFFFFF,red%0d%0a
hsa04012	ErbB signaling pathway	Environmental Information Processing	Signal transduction	3	84	0.186327	0.917013	ENSG00000065361(ERBB3),ENSG00000109339(MAPK10),ENSG00000169752(NRG4)	http://www.kegg.jp/kegg-bin/show_pathway?map=map04012&multi_query=K04440+%23FFFFFF,red%0d%0aK05458+%23FFFFFF,red%0d%0aK05084+%23FFFFFF,red%0d%0a
hsa04620	Toll-like receptor signaling pathway	Organismal Systems	Immune system	2	101	0.537646	0.917013	ENSG00000108984(MAP2K6),ENSG00000109339(MAPK10)	http://www.kegg.jp/kegg-bin/show_pathway?map=map04620&multi_query=K04433+%23FFFFFF,red%0d%0aK04440+%23FFFFFF,red%0d%0a

## Sheet: 0h_vs_6h
PathwayID	Pathway	Level1	Level2	DEG_number	total_number	Pvalue	FDR	URL
hsa04668	TNF signaling pathway	Environmental Information Processing	Signal transduction	28	112	9.99905e-15	2.96972e-12	http://www.kegg.jp/kegg-bin/show_pathway?map04668/K09444%09%23FFFFFF,red/K04734%09%23FFFFFF,red/K05173%09%23FFFFFF,red/K06052%09%23FFFFFF,red/K09047%09%23FFFFFF,red/K05419%09%23FFFFFF,red/K04696%09%23FFFFFF,red/K04379%09%23FFFFFF,red/K06490%09%23FFFFFF,red/K03172%09%23FFFFFF,red/K14624%09%23FFFFFF,red/K05405%09%23FFFFFF,red/K05505%09%23FFFFFF,red/K14625%09%23FFFFFF,red/K04390%09%23FFFFFF,red/K025…
hsa04625	C-type lectin receptor signaling pathway	Organismal Systems	Immune system	13	104	0.000392358	0.00832359	http://www.kegg.jp/kegg-bin/show_pathway?map04625/K02580%09%23FFFFFF,red/K07983%09%23FFFFFF,red/K08862%09%23FFFFFF,red/K04469%09%23FFFFFF,red/K09444%09%23FFFFFF,red/K04734%09%23FFFFFF,red/K09253%09%23FFFFFF,red/K09258%09%23FFFFFF,red/K12496%09%23FFFFFF,red/K12794%09%23FFFFFF,red/K05405%09%23FFFFFF,red/K04440%09%23FFFFFF,green/K03156%09%23FFFFFF,red/
hsa04064	NF-kappa B signaling pathway	Environmental Information Processing	Signal transduction	15	102	2.12168e-05	0.000849977	http://www.kegg.jp/kegg-bin/show_pathway?map04064/K06490%09%23FFFFFF,red/K04734%09%23FFFFFF,red/K05505%09%23FFFFFF,red/K10030%09%23FFFFFF,red/K03156%09%23FFFFFF,red/K05842%09%23FFFFFF,red/K11859%09%23FFFFFF,red/K16060%09%23FFFFFF,red/K03172%09%23FFFFFF,red/K02580%09%23FFFFFF,red/K09253%09%23FFFFFF,red/K04469%09%23FFFFFF,red/K06527%09%23FFFFFF,red/
hsa04657	IL-17 signaling pathway	Organismal Systems	Immune system	17	94	3.09043e-07	4.58929e-05	http://www.kegg.jp/kegg-bin/show_pathway?map04657/K02580%09%23FFFFFF,red/K04379%09%23FFFFFF,red/K05405%09%23FFFFFF,red/K12671%09%23FFFFFF,red/K03156%09%23FFFFFF,red/K09029%09%23FFFFFF,red/K04502%09%23FFFFFF,red/K11859%09%23FFFFFF,red/K21125%09%23FFFFFF,red/K04734%09%23FFFFFF,red/K05509%09%23FFFFFF,red/K04440%09%23FFFFFF,green/K05505%09%23FFFFFF,red/K10030%09%23FFFFFF,red/K14624%09%23FFFFFF,red/K1…
hsa04010	MAPK signaling pathway	Environmental Information Processing	Signal transduction	31	294	2.18847e-06	0.000162494	http://www.kegg.jp/kegg-bin/show_pathway?map04010/K04855%09%23FFFFFF,green/K09253%09%23FFFFFF,red/K05084%09%23FFFFFF,green/K04469%09%23FFFFFF,red/K09782%09%23FFFFFF,red/K20216%09%23FFFFFF,red/K04379%09%23FFFFFF,red/K04361%09%23FFFFFF,red/K04433%09%23FFFFFF,green/K05103%09%23FFFFFF,red/K18497%09%23FFFFFF,red/K21278%09%23FFFFFF,red/K03283%09%23FFFFFF,red/K04873%09%23FFFFFF,red/K08053%09%23FFFFFF,re…
hsa04621	NOD-like receptor signaling pathway	Organismal Systems	Immune system	21	181	2.2895e-05	0.000849977	http://www.kegg.jp/kegg-bin/show_pathway?map04621/K02580%09%23FFFFFF,red/K04734%09%23FFFFFF,red/K16060%09%23FFFFFF,red/K03156%09%23FFFFFF,red/K03462%09%23FFFFFF,red/K03443%09%23FFFFFF,red/K11859%09%23FFFFFF,red/K04394%09%23FFFFFF,red/K20910%09%23FFFFFF,green/K20899%09%23FFFFFF,red/K04440%09%23FFFFFF,green/K12794%09%23FFFFFF,red/K05505%09%23FFFFFF,red/K05842%09%23FFFFFF,red/K12803%09%23FFFFFF,red/…
hsa04630	JAK-STAT signaling pathway	Environmental Information Processing	Signal transduction	20	161	1.30343e-05	0.00077424	http://www.kegg.jp/kegg-bin/show_pathway?map04630/K05060%09%23FFFFFF,red/K04737%09%23FFFFFF,red/K04696%09%23FFFFFF,red/K04695%09%23FFFFFF,red/K06625%09%23FFFFFF,red/K02539%09%23FFFFFF,red/K05071%09%23FFFFFF,red/K04361%09%23FFFFFF,red/K19598%09%23FFFFFF,red/K05058%09%23FFFFFF,red/K00157%09%23FFFFFF,green/K05442%09%23FFFFFF,red/K05072%09%23FFFFFF,red/K05089%09%23FFFFFF,green/K05436%09%23FFFFFF,red/…
hsa04390	Hippo signaling pathway	Environmental Information Processing	Signal transduction	15	157	0.00244651	0.0252705	http://www.kegg.jp/kegg-bin/show_pathway?map04390/K21098%09%23FFFFFF,green/K00445%09%23FFFFFF,green/K02235%09%23FFFFFF,green/K21283%09%23FFFFFF,red/K00572%09%23FFFFFF,red/K16822%09%23FFFFFF,red/K04662%09%23FFFFFF,green/K09782%09%23FFFFFF,red/K17693%09%23FFFFFF,green/K16060%09%23FFFFFF,red/K16620%09%23FFFFFF,red/K10148%09%23FFFFFF,green/K06827%09%23FFFFFF,red/K23605%09%23FFFFFF,red/
hsa04350	TGF-beta signaling pathway	Environmental Information Processing	Signal transduction	8	93	0.0407861	0.164574	http://www.kegg.jp/kegg-bin/show_pathway?map04350/K04661%09%23FFFFFF,red/K04662%09%23FFFFFF,green/K21283%09%23FFFFFF,red/K03156%09%23FFFFFF,red/K16620%09%23FFFFFF,red/K17693%09%23FFFFFF,green/K16857%09%23FFFFFF,red/K23605%09%23FFFFFF,red/
hsa04068	FoxO signaling pathway	Environmental Information Processing	Signal transduction	10	129	0.0441796	0.168222	http://www.kegg.jp/kegg-bin/show_pathway?map04068/K23605%09%23FFFFFF,red/K05405%09%23FFFFFF,red/K08341%09%23FFFFFF,red/K08862%09%23FFFFFF,red/K04361%09%23FFFFFF,red/K13302%09%23FFFFFF,red/K06625%09%23FFFFFF,red/K04564%09%23FFFFFF,red/K04440%09%23FFFFFF,green/K05072%09%23FFFFFF,red/
hsa04066	HIF-1 signaling pathway	Environmental Information Processing	Signal transduction	8	109	0.0864197	0.261905	http://www.kegg.jp/kegg-bin/show_pathway?map04066/K00844%09%23FFFFFF,red/K05405%09%23FFFFFF,red/K05132%09%23FFFFFF,red/K06625%09%23FFFFFF,red/K01689%09%23FFFFFF,green/K02580%09%23FFFFFF,red/K04361%09%23FFFFFF,red/K09592%09%23FFFFFF,red/
hsa04024	cAMP signaling pathway	Environmental Information Processing	Signal transduction	18	218	0.00471732	0.0341718	http://www.kegg.jp/kegg-bin/show_pathway?map04024/K04734%09%23FFFFFF,red/K04379%09%23FFFFFF,red/K04249%09%23FFFFFF,green/K08522%09%23FFFFFF,red/K09047%09%23FFFFFF,red/K04221%09%23FFFFFF,green/K05730%09%23FFFFFF,green/K13293%09%23FFFFFF,red/K04266%09%23FFFFFF,red/K16367%09%23FFFFFF,green/K08014%09%23FFFFFF,red/K01115%09%23FFFFFF,green/K04590%09%23FFFFFF,green/K04265%09%23FFFFFF,green/K02580%09%23F…
hsa04310	Wnt signaling pathway	Environmental Information Processing	Signal transduction	9	166	0.259981	0.48058	http://www.kegg.jp/kegg-bin/show_pathway?map04310/K15694%09%23FFFFFF,green/K04440%09%23FFFFFF,green/K05123%09%23FFFFFF,green/K02165%09%23FFFFFF,red/K23605%09%23FFFFFF,red/K00572%09%23FFFFFF,red/K02235%09%23FFFFFF,green/K04502%09%23FFFFFF,red/K00445%09%23FFFFFF,green/
hsa04012	ErbB signaling pathway	Environmental Information Processing	Signal transduction	7	84	0.0617263	0.201591	http://www.kegg.jp/kegg-bin/show_pathway?map04012/K09782%09%23FFFFFF,red/K08523%09%23FFFFFF,red/K06625%09%23FFFFFF,red/K05084%09%23FFFFFF,green/K04440%09%23FFFFFF,green/K05458%09%23FFFFFF,green/K04361%09%23FFFFFF,red/
hsa04620	Toll-like receptor signaling pathway	Organismal Systems	Immune system	11	101	0.00329034	0.0296131	http://www.kegg.jp/kegg-bin/show_pathway?map04620/K04379%09%23FFFFFF,red/K02580%09%23FFFFFF,red/K10030%09%23FFFFFF,red/K04734%09%23FFFFFF,red/K05842%09%23FFFFFF,red/K12671%09%23FFFFFF,red/K05405%09%23FFFFFF,red/K04440%09%23FFFFFF,green/K03156%09%23FFFFFF,red/K04432%09%23FFFFFF,red/K04433%09%23FFFFFF,green/

## Sheet: 0h_vs_12h_Up
PathwayID	Pathway	Level1	Levwl2	list_number	total_number	Pvalue	FDR	Gene	URL
hsa04668	TNF signaling pathway	Environmental Information Processing	Signal transduction	21	112	5.17593e-13	1.34574e-10	ENSG00000128342(LIF),ENSG00000090339(ICAM1),ENSG00000171608(PIK3CD),ENSG00000056558(TRAF1),ENSG00000110330(BIRC2),ENSG00000157227(MMP14),ENSG00000136244(IL6),ENSG00000171223(JUNB),ENSG00000115604(IL18R1),ENSG00000146592(CREB5),ENSG00000081041(CXCL2),ENSG00000271503(CCL5),ENSG00000170345(FOS),ENSG00000023445(BIRC3),ENSG00000069399(BCL3),ENSG00000100906(NFKBIA),ENSG00000232810(TNF),ENSG00000184557(…	http://www.kegg.jp/kegg-bin/show_pathway?map=map04668&multi_query=K03172+%23FFFFFF,red%0d%0aK04379+%23FFFFFF,red%0d%0aK11859+%23FFFFFF,red%0d%0aK09047+%23FFFFFF,red%0d%0aK04734+%23FFFFFF,red%0d%0aK03156+%23FFFFFF,red%0d%0aK05505+%23FFFFFF,red%0d%0aK09028+%23FFFFFF,red%0d%0aK16060+%23FFFFFF,red%0d%0aK07763+%23FFFFFF,red%0d%0aK05419+%23FFFFFF,red%0d%0aK05405+%23FFFFFF,red%0d%0aK14625+%23FFFFFF,red%…
hsa04625	C-type lectin receptor signaling pathway	Organismal Systems	Immune system	10	104	0.000318253	0.00413729	ENSG00000069399(BCL3),ENSG00000232810(TNF),ENSG00000100906(NFKBIA),ENSG00000179388(EGR3),ENSG00000104856(RELB),ENSG00000171608(PIK3CD),ENSG00000122877(EGR2),ENSG00000136244(IL6),ENSG00000173846(PLK3),ENSG00000077150(NFKB2)	http://www.kegg.jp/kegg-bin/show_pathway?map=map04625&multi_query=K00922+%23FFFFFF,red%0d%0aK03156+%23FFFFFF,red%0d%0aK04734+%23FFFFFF,red%0d%0aK04469+%23FFFFFF,red%0d%0aK12496+%23FFFFFF,red%0d%0aK12497+%23FFFFFF,red%0d%0aK05405+%23FFFFFF,red%0d%0aK08862+%23FFFFFF,red%0d%0aK09253+%23FFFFFF,red%0d%0aK09258+%23FFFFFF,red%0d%0a
hsa04064	NF-kappa B signaling pathway	Environmental Information Processing	Signal transduction	12	102	1.05179e-05	0.000390663	ENSG00000077150(NFKB2),ENSG00000081041(CXCL2),ENSG00000056558(TRAF1),ENSG00000110330(BIRC2),ENSG00000136869(TLR4),ENSG00000104856(RELB),ENSG00000090339(ICAM1),ENSG00000118503(TNFAIP3),ENSG00000232810(TNF),ENSG00000100906(NFKBIA),ENSG00000023445(BIRC3),ENSG00000169429(CXCL8)	http://www.kegg.jp/kegg-bin/show_pathway?map=map04064&multi_query=K09253+%23FFFFFF,red%0d%0aK03172+%23FFFFFF,red%0d%0aK03156+%23FFFFFF,red%0d%0aK16060+%23FFFFFF,red%0d%0aK10160+%23FFFFFF,red%0d%0aK06490+%23FFFFFF,red%0d%0aK04469+%23FFFFFF,red%0d%0aK04734+%23FFFFFF,red%0d%0aK10030+%23FFFFFF,red%0d%0aK11859+%23FFFFFF,red%0d%0aK05505+%23FFFFFF,red%0d%0a
hsa04657	IL-17 signaling pathway	Organismal Systems	Immune system	13	94	6.92055e-07	4.49836e-05	ENSG00000081041(CXCL2),ENSG00000136244(IL6),ENSG00000175592(FOSL1),ENSG00000196611(MMP1),ENSG00000163701(IL17RE),ENSG00000118503(TNFAIP3),ENSG00000115009(CCL20),ENSG00000125740(FOSB),ENSG00000100906(NFKBIA),ENSG00000232810(TNF),ENSG00000108691(CCL2),ENSG00000170345(FOS),ENSG00000169429(CXCL8)	http://www.kegg.jp/kegg-bin/show_pathway?map=map04657&multi_query=K10030+%23FFFFFF,red%0d%0aK14625+%23FFFFFF,red%0d%0aK01388+%23FFFFFF,red%0d%0aK14624+%23FFFFFF,red%0d%0aK04734+%23FFFFFF,red%0d%0aK05168+%23FFFFFF,red%0d%0aK09029+%23FFFFFF,red%0d%0aK04502+%23FFFFFF,red%0d%0aK03156+%23FFFFFF,red%0d%0aK04379+%23FFFFFF,red%0d%0aK11859+%23FFFFFF,red%0d%0aK05505+%23FFFFFF,red%0d%0aK05405+%23FFFFFF,red%…
hsa04010	MAPK signaling pathway	Environmental Information Processing	Signal transduction	19	294	0.000186812	0.00323808	ENSG00000120129(DUSP1),ENSG00000104856(RELB),ENSG00000196083(IL1RAP),ENSG00000123358(NR4A1),ENSG00000146648(EGFR),ENSG00000109321(AREG),ENSG00000139318(DUSP6),ENSG00000142408(CACNG8),ENSG00000173110(HSPA6),ENSG00000077150(NFKB2),ENSG00000170345(FOS),ENSG00000232810(TNF),ENSG00000115008(IL1A),ENSG00000142627(EPHA2),ENSG00000143507(DUSP10),ENSG00000106799(TGFBR1),ENSG00000138166(DUSP5),ENSG00000153…	http://www.kegg.jp/kegg-bin/show_pathway?map=map04010&multi_query=K04469+%23FFFFFF,red%0d%0aK04458+%23FFFFFF,red%0d%0aK09782+%23FFFFFF,red%0d%0aK04361+%23FFFFFF,red%0d%0aK05103+%23FFFFFF,red%0d%0aK03156+%23FFFFFF,red%0d%0aK04383+%23FFFFFF,red%0d%0aK21946+%23FFFFFF,red%0d%0aK04379+%23FFFFFF,red%0d%0aK04723+%23FFFFFF,red%0d%0aK20216+%23FFFFFF,red%0d%0aK04465+%23FFFFFF,red%0d%0aK09253+%23FFFFFF,red%…
hsa04621	NOD-like receptor signaling pathway	Organismal Systems	Immune system	14	181	0.000219803	0.00342675	ENSG00000108691(CCL2),ENSG00000232810(TNF),ENSG00000100906(NFKBIA),ENSG00000117226(GBP3),ENSG00000196954(CASP4),ENSG00000169429(CXCL8),ENSG00000023445(BIRC3),ENSG00000118503(TNFAIP3),ENSG00000139112(GABARAPL1),ENSG00000136869(TLR4),ENSG00000110330(BIRC2),ENSG00000081041(CXCL2),ENSG00000271503(CCL5),ENSG00000136244(IL6)	http://www.kegg.jp/kegg-bin/show_pathway?map=map04621&multi_query=K10160+%23FFFFFF,red%0d%0aK08341+%23FFFFFF,red%0d%0aK04734+%23FFFFFF,red%0d%0aK05505+%23FFFFFF,red%0d%0aK16060+%23FFFFFF,red%0d%0aK20899+%23FFFFFF,red%0d%0aK12499+%23FFFFFF,red%0d%0aK05405+%23FFFFFF,red%0d%0aK11859+%23FFFFFF,red%0d%0aK04394+%23FFFFFF,red%0d%0aK10030+%23FFFFFF,red%0d%0aK14624+%23FFFFFF,red%0d%0aK03156+%23FFFFFF,red%…
hsa04630	JAK-STAT signaling pathway	Environmental Information Processing	Signal transduction	13	161	0.000242203	0.00342675	ENSG00000146648(EGFR),ENSG00000095752(IL11),ENSG00000171608(PIK3CD),ENSG00000184557(SOCS3),ENSG00000077238(IL4R),ENSG00000124762(CDKN1A),ENSG00000145623(OSMR),ENSG00000162892(IL24),ENSG00000120833(SOCS2),ENSG00000128342(LIF),ENSG00000184995(IFNE),ENSG00000168685(IL7R),ENSG00000136244(IL6)	http://www.kegg.jp/kegg-bin/show_pathway?map=map04630&multi_query=K05419+%23FFFFFF,red%0d%0aK06625+%23FFFFFF,red%0d%0aK05057+%23FFFFFF,red%0d%0aK05442+%23FFFFFF,red%0d%0aK22668+%23FFFFFF,red%0d%0aK00922+%23FFFFFF,red%0d%0aK04361+%23FFFFFF,red%0d%0aK04696+%23FFFFFF,red%0d%0aK05071+%23FFFFFF,red%0d%0aK04695+%23FFFFFF,red%0d%0aK05072+%23FFFFFF,red%0d%0aK05405+%23FFFFFF,red%0d%0aK05417+%23FFFFFF,red%…
hsa04390	Hippo signaling pathway	Environmental Information Processing	Signal transduction	7	157	0.1091	0.301765	ENSG00000109321(AREG),ENSG00000110330(BIRC2),ENSG00000153162(BMP6),ENSG00000118523(CCN2),ENSG00000023445(BIRC3),ENSG00000177283(FZD8),ENSG00000106799(TGFBR1)	http://www.kegg.jp/kegg-bin/show_pathway?map=map04390&multi_query=K02375+%23FFFFFF,red%0d%0aK04674+%23FFFFFF,red%0d%0aK16620+%23FFFFFF,red%0d%0aK09782+%23FFFFFF,red%0d%0aK06827+%23FFFFFF,red%0d%0aK16060+%23FFFFFF,red%0d%0a
hsa04350	TGF-beta signaling pathway	Environmental Information Processing	Signal transduction	5	93	0.0905321	0.270556	ENSG00000134363(FST),ENSG00000153162(BMP6),ENSG00000187720(THSD4),ENSG00000106799(TGFBR1),ENSG00000232810(TNF)	http://www.kegg.jp/kegg-bin/show_pathway?map=map04350&multi_query=K23377+%23FFFFFF,red%0d%0aK03156+%23FFFFFF,red%0d%0aK04674+%23FFFFFF,red%0d%0aK04661+%23FFFFFF,red%0d%0aK16620+%23FFFFFF,red%0d%0a
hsa04068	FoxO signaling pathway	Environmental Information Processing	Signal transduction	11	129	0.000458663	0.0051374	ENSG00000106799(TGFBR1),ENSG00000139112(GABARAPL1),ENSG00000112096(SOD2),ENSG00000171608(PIK3CD),ENSG00000118515(SGK1),ENSG00000146648(EGFR),ENSG00000181856(SLC2A4),ENSG00000124762(CDKN1A),ENSG00000168685(IL7R),ENSG00000173846(PLK3),ENSG00000136244(IL6)	http://www.kegg.jp/kegg-bin/show_pathway?map=map04068&multi_query=K04564+%23FFFFFF,red%0d%0aK06625+%23FFFFFF,red%0d%0aK08341+%23FFFFFF,red%0d%0aK07191+%23FFFFFF,red%0d%0aK04361+%23FFFFFF,red%0d%0aK13302+%23FFFFFF,red%0d%0aK04674+%23FFFFFF,red%0d%0aK05405+%23FFFFFF,red%0d%0aK00922+%23FFFFFF,red%0d%0aK05072+%23FFFFFF,red%0d%0aK08862+%23FFFFFF,red%0d%0a
hsa04066	HIF-1 signaling pathway	Environmental Information Processing	Signal transduction	6	109	0.0611728	0.206558	ENSG00000136244(IL6),ENSG00000156510(HKDC1),ENSG00000124762(CDKN1A),ENSG00000171608(PIK3CD),ENSG00000136869(TLR4),ENSG00000146648(EGFR)	http://www.kegg.jp/kegg-bin/show_pathway?map=map04066&multi_query=K00922+%23FFFFFF,red%0d%0aK04361+%23FFFFFF,red%0d%0aK10160+%23FFFFFF,red%0d%0aK06625+%23FFFFFF,red%0d%0aK00844+%23FFFFFF,red%0d%0aK05405+%23FFFFFF,red%0d%0a
hsa04024	cAMP signaling pathway	Environmental Information Processing	Signal transduction	8	218	0.197793	0.443329	ENSG00000171608(PIK3CD),ENSG00000179546(HTR1D),ENSG00000146592(CREB5),ENSG00000170345(FOS),ENSG00000079337(RAPGEF3),ENSG00000129991(TNNI3),ENSG00000100906(NFKBIA),ENSG00000135346(CGA)	http://www.kegg.jp/kegg-bin/show_pathway?map=map04024&multi_query=K08014+%23FFFFFF,red%0d%0aK04379+%23FFFFFF,red%0d%0aK00922+%23FFFFFF,red%0d%0aK12044+%23FFFFFF,red%0d%0aK04734+%23FFFFFF,red%0d%0aK08522+%23FFFFFF,red%0d%0aK09047+%23FFFFFF,red%0d%0aK04153+%23FFFFFF,red%0d%0a
hsa04310	Wnt signaling pathway	Environmental Information Processing	Signal transduction	3	166	0.804725	0.929904	ENSG00000107984(DKK1),ENSG00000177283(FZD8),ENSG00000175592(FOSL1)	http://www.kegg.jp/kegg-bin/show_pathway?map=map04310&multi_query=K02375+%23FFFFFF,red%0d%0aK04502+%23FFFFFF,red%0d%0aK02165+%23FFFFFF,red%0d%0a
hsa04012	ErbB signaling pathway	Environmental Information Processing	Signal transduction	5	84	0.0643721	0.211858	ENSG00000146648(EGFR),ENSG00000171608(PIK3CD),ENSG00000109321(AREG),ENSG00000124762(CDKN1A),ENSG00000113070(HBEGF)	http://www.kegg.jp/kegg-bin/show_pathway?map=map04012&multi_query=K04361+%23FFFFFF,red%0d%0aK08523+%23FFFFFF,red%0d%0aK00922+%23FFFFFF,red%0d%0aK09782+%23FFFFFF,red%0d%0aK06625+%23FFFFFF,red%0d%0a
hsa04620	Toll-like receptor signaling pathway	Organismal Systems	Immune system	10	101	0.000250416	0.00342675	ENSG00000171608(PIK3CD),ENSG00000136869(TLR4),ENSG00000271503(CCL5),ENSG00000136244(IL6),ENSG00000169248(CXCL11),ENSG00000100906(NFKBIA),ENSG00000232810(TNF),ENSG00000169429(CXCL8),ENSG00000170345(FOS),ENSG00000174130(TLR6)	http://www.kegg.jp/kegg-bin/show_pathway?map=map04620&multi_query=K10030+%23FFFFFF,red%0d%0aK00922+%23FFFFFF,red%0d%0aK10160+%23FFFFFF,red%0d%0aK04734+%23FFFFFF,red%0d%0aK05405+%23FFFFFF,red%0d%0aK10169+%23FFFFFF,red%0d%0aK03156+%23FFFFFF,red%0d%0aK12499+%23FFFFFF,red%0d%0aK12672+%23FFFFFF,red%0d%0aK04379+%23FFFFFF,red%0d%0a

## Sheet: 0h_vs_12h_Down
PathwayID	Pathway	Level1	Levwl2	list_number	total_number	Pvalue	FDR	Gene	URL
hsa04668	TNF signaling pathway	Environmental Information Processing	Signal transduction	2	112	0.213334	0.552983	ENSG00000078401(EDN1),ENSG00000108984(MAP2K6)	http://www.kegg.jp/kegg-bin/show_pathway?map=map04668&multi_query=K16366+%23FFFFFF,red%0d%0aK04433+%23FFFFFF,red%0d%0a
hsa04010	MAPK signaling pathway	Environmental Information Processing	Signal transduction	3	294	0.396166	0.614525	ENSG00000108984(MAP2K6),ENSG00000141510(TP53),ENSG00000113721(PDGFRB)	http://www.kegg.jp/kegg-bin/show_pathway?map=map04010&multi_query=K04451+%23FFFFFF,red%0d%0aK05089+%23FFFFFF,red%0d%0aK04433+%23FFFFFF,red%0d%0a
hsa04621	NOD-like receptor signaling pathway	Organismal Systems	Immune system	1	181	0.757357	0.78526	ENSG00000182621(PLCB1)	http://www.kegg.jp/kegg-bin/show_pathway?map=map04621&multi_query=K05858+%23FFFFFF,red%0d%0a
hsa04630	JAK-STAT signaling pathway	Environmental Information Processing	Signal transduction	2	161	0.353056	0.599587	ENSG00000138356(AOX1),ENSG00000113721(PDGFRB)	http://www.kegg.jp/kegg-bin/show_pathway?map=map04630&multi_query=K05089+%23FFFFFF,red%0d%0aK00157+%23FFFFFF,red%0d%0a
hsa04390	Hippo signaling pathway	Environmental Information Processing	Signal transduction	4	157	0.0323929	0.303877	ENSG00000115596(WNT6),ENSG00000156475(PPP2R2B),ENSG00000078900(TP73),ENSG00000115738(ID2)	http://www.kegg.jp/kegg-bin/show_pathway?map=map04390&multi_query=K04354+%23FFFFFF,red%0d%0aK17693+%23FFFFFF,red%0d%0aK10148+%23FFFFFF,red%0d%0aK00445+%23FFFFFF,red%0d%0a
hsa04350	TGF-beta signaling pathway	Environmental Information Processing	Signal transduction	1	93	0.514932	0.640914	ENSG00000115738(ID2)	http://www.kegg.jp/kegg-bin/show_pathway?map=map04350&multi_query=K17693+%23FFFFFF,red%0d%0a
hsa04066	HIF-1 signaling pathway	Environmental Information Processing	Signal transduction	1	109	0.57208	0.65906	ENSG00000078401(EDN1)	http://www.kegg.jp/kegg-bin/show_pathway?map=map04066&multi_query=K16366+%23FFFFFF,red%0d%0a
hsa04024	cAMP signaling pathway	Environmental Information Processing	Signal transduction	5	218	0.0257661	0.267154	ENSG00000134215(VAV3),ENSG00000078401(EDN1),ENSG00000106018(VIPR2),ENSG00000127129(EDN2),ENSG00000165409(TSHR)	http://www.kegg.jp/kegg-bin/show_pathway?map=map04024&multi_query=K16366+%23FFFFFF,red%0d%0aK16367+%23FFFFFF,red%0d%0aK04590+%23FFFFFF,red%0d%0aK04249+%23FFFFFF,red%0d%0aK05730+%23FFFFFF,red%0d%0a
hsa04310	Wnt signaling pathway	Environmental Information Processing	Signal transduction	3	166	0.135571	0.494584	ENSG00000182621(PLCB1),ENSG00000141510(TP53),ENSG00000115596(WNT6)	http://www.kegg.jp/kegg-bin/show_pathway?map=map04310&multi_query=K04451+%23FFFFFF,red%0d%0aK00445+%23FFFFFF,red%0d%0aK05858+%23FFFFFF,red%0d%0a
hsa04012	ErbB signaling pathway	Environmental Information Processing	Signal transduction	1	84	0.479555	0.639036	ENSG00000169752(NRG4)	http://www.kegg.jp/kegg-bin/show_pathway?map=map04012&multi_query=K05458+%23FFFFFF,red%0d%0a
hsa04620	Toll-like receptor signaling pathway	Organismal Systems	Immune system	1	101	0.544386	0.646048	ENSG00000108984(MAP2K6)	http://www.kegg.jp/kegg-bin/show_pathway?map=map04620&multi_query=K04433+%23FFFFFF,red%0d%0a

## Sheet: 0h_vs_12h
PathwayID	Pathway	Level1	Level2	DEG_number	total_number	Pvalue	FDR	URL
hsa04668	TNF signaling pathway	Environmental Information Processing	Signal transduction	23	112	1.51e-13	4.2884e-11	http://www.kegg.jp/kegg-bin/show_pathway?map04668/K14625%09%23FFFFFF,red/K05405%09%23FFFFFF,red/K05419%09%23FFFFFF,red/K04696%09%23FFFFFF,red/K09258%09%23FFFFFF,red/K03172%09%23FFFFFF,red/K07763%09%23FFFFFF,red/K16366%09%23FFFFFF,green/K05505%09%23FFFFFF,red/K00922%09%23FFFFFF,red/K04379%09%23FFFFFF,red/K12499%09%23FFFFFF,red/K03156%09%23FFFFFF,red/K11859%09%23FFFFFF,red/K05173%09%23FFFFFF,red/K0…
hsa04625	C-type lectin receptor signaling pathway	Organismal Systems	Immune system	10	104	0.000997001	0.00858025	http://www.kegg.jp/kegg-bin/show_pathway?map04625/K04734%09%23FFFFFF,red/K09258%09%23FFFFFF,red/K08862%09%23FFFFFF,red/K03156%09%23FFFFFF,red/K09253%09%23FFFFFF,red/K00922%09%23FFFFFF,red/K12497%09%23FFFFFF,red/K04469%09%23FFFFFF,red/K05405%09%23FFFFFF,red/K12496%09%23FFFFFF,red/
hsa04064	NF-kappa B signaling pathway	Environmental Information Processing	Signal transduction	12	102	4.60389e-05	0.00118864	http://www.kegg.jp/kegg-bin/show_pathway?map04064/K10030%09%23FFFFFF,red/K06490%09%23FFFFFF,red/K04734%09%23FFFFFF,red/K03156%09%23FFFFFF,red/K03172%09%23FFFFFF,red/K04469%09%23FFFFFF,red/K11859%09%23FFFFFF,red/K16060%09%23FFFFFF,red/K10160%09%23FFFFFF,red/K09253%09%23FFFFFF,red/K05505%09%23FFFFFF,red/
hsa04657	IL-17 signaling pathway	Organismal Systems	Immune system	13	94	3.7093e-06	0.000210688	http://www.kegg.jp/kegg-bin/show_pathway?map04657/K04502%09%23FFFFFF,red/K01388%09%23FFFFFF,red/K04734%09%23FFFFFF,red/K05168%09%23FFFFFF,red/K14625%09%23FFFFFF,red/K03156%09%23FFFFFF,red/K04379%09%23FFFFFF,red/K05505%09%23FFFFFF,red/K09029%09%23FFFFFF,red/K10030%09%23FFFFFF,red/K05405%09%23FFFFFF,red/K11859%09%23FFFFFF,red/K14624%09%23FFFFFF,red/
hsa04010	MAPK signaling pathway	Environmental Information Processing	Signal transduction	22	294	6.37857e-05	0.00136804	http://www.kegg.jp/kegg-bin/show_pathway?map04010/K09782%09%23FFFFFF,red/K09253%09%23FFFFFF,red/K04379%09%23FFFFFF,red/K21278%09%23FFFFFF,red/K03283%09%23FFFFFF,red/K04469%09%23FFFFFF,red/K04465%09%23FFFFFF,red/K04674%09%23FFFFFF,red/K04458%09%23FFFFFF,red/K04433%09%23FFFFFF,green/K21946%09%23FFFFFF,red/K04459%09%23FFFFFF,red/K05089%09%23FFFFFF,green/K04361%09%23FFFFFF,red/K05103%09%23FFFFFF,red/…
hsa04621	NOD-like receptor signaling pathway	Organismal Systems	Immune system	15	181	0.000312887	0.00386348	http://www.kegg.jp/kegg-bin/show_pathway?map04621/K16060%09%23FFFFFF,red/K10030%09%23FFFFFF,red/K12499%09%23FFFFFF,red/K04394%09%23FFFFFF,red/K03156%09%23FFFFFF,red/K20899%09%23FFFFFF,red/K05858%09%23FFFFFF,green/K05405%09%23FFFFFF,red/K14624%09%23FFFFFF,red/K11859%09%23FFFFFF,red/K10160%09%23FFFFFF,red/K08341%09%23FFFFFF,red/K04734%09%23FFFFFF,red/K05505%09%23FFFFFF,red/
hsa04630	JAK-STAT signaling pathway	Environmental Information Processing	Signal transduction	15	161	8.55329e-05	0.0014289	http://www.kegg.jp/kegg-bin/show_pathway?map04630/K05442%09%23FFFFFF,red/K05405%09%23FFFFFF,red/K00922%09%23FFFFFF,red/K05071%09%23FFFFFF,red/K05419%09%23FFFFFF,red/K05072%09%23FFFFFF,red/K06625%09%23FFFFFF,red/K04696%09%23FFFFFF,red/K04695%09%23FFFFFF,red/K05417%09%23FFFFFF,red/K05089%09%23FFFFFF,green/K00157%09%23FFFFFF,green/K05057%09%23FFFFFF,red/K22668%09%23FFFFFF,red/K04361%09%23FFFFFF,red/
hsa04390	Hippo signaling pathway	Environmental Information Processing	Signal transduction	11	157	0.00693017	0.0364476	http://www.kegg.jp/kegg-bin/show_pathway?map04390/K00445%09%23FFFFFF,green/K06827%09%23FFFFFF,red/K02375%09%23FFFFFF,red/K17693%09%23FFFFFF,green/K09782%09%23FFFFFF,red/K16060%09%23FFFFFF,red/K04354%09%23FFFFFF,green/K16620%09%23FFFFFF,red/K10148%09%23FFFFFF,green/K04674%09%23FFFFFF,red/
hsa04350	TGF-beta signaling pathway	Environmental Information Processing	Signal transduction	6	93	0.0570498	0.162021	http://www.kegg.jp/kegg-bin/show_pathway?map04350/K03156%09%23FFFFFF,red/K04674%09%23FFFFFF,red/K04661%09%23FFFFFF,red/K17693%09%23FFFFFF,green/K23377%09%23FFFFFF,red/K16620%09%23FFFFFF,red/
hsa04068	FoxO signaling pathway	Environmental Information Processing	Signal transduction	11	129	0.00153074	0.0114402	http://www.kegg.jp/kegg-bin/show_pathway?map04068/K04564%09%23FFFFFF,red/K08341%09%23FFFFFF,red/K07191%09%23FFFFFF,red/K06625%09%23FFFFFF,red/K13302%09%23FFFFFF,red/K08862%09%23FFFFFF,red/K05405%09%23FFFFFF,red/K05072%09%23FFFFFF,red/K04674%09%23FFFFFF,red/K04361%09%23FFFFFF,red/K00922%09%23FFFFFF,red/
hsa04066	HIF-1 signaling pathway	Environmental Information Processing	Signal transduction	7	109	0.0425302	0.134206	http://www.kegg.jp/kegg-bin/show_pathway?map04066/K10160%09%23FFFFFF,red/K04361%09%23FFFFFF,red/K00844%09%23FFFFFF,red/K06625%09%23FFFFFF,red/K05405%09%23FFFFFF,red/K16366%09%23FFFFFF,green/K00922%09%23FFFFFF,red/
hsa04024	cAMP signaling pathway	Environmental Information Processing	Signal transduction	13	218	0.0128928	0.0590575	http://www.kegg.jp/kegg-bin/show_pathway?map04024/K08014%09%23FFFFFF,red/K00922%09%23FFFFFF,red/K16367%09%23FFFFFF,green/K04153%09%23FFFFFF,red/K08522%09%23FFFFFF,red/K09047%09%23FFFFFF,red/K16366%09%23FFFFFF,green/K12044%09%23FFFFFF,red/K04590%09%23FFFFFF,green/K04249%09%23FFFFFF,green/K04734%09%23FFFFFF,red/K05730%09%23FFFFFF,green/K04379%09%23FFFFFF,red/
hsa04310	Wnt signaling pathway	Environmental Information Processing	Signal transduction	6	166	0.366148	0.519931	http://www.kegg.jp/kegg-bin/show_pathway?map04310/K04502%09%23FFFFFF,red/K00445%09%23FFFFFF,green/K02165%09%23FFFFFF,red/K05858%09%23FFFFFF,green/K02375%09%23FFFFFF,red/K04451%09%23FFFFFF,green/
hsa04012	ErbB signaling pathway	Environmental Information Processing	Signal transduction	6	84	0.0377685	0.12329	http://www.kegg.jp/kegg-bin/show_pathway?map04012/K04361%09%23FFFFFF,red/K09782%09%23FFFFFF,red/K08523%09%23FFFFFF,red/K00922%09%23FFFFFF,red/K05458%09%23FFFFFF,green/K06625%09%23FFFFFF,red/
hsa04620	Toll-like receptor signaling pathway	Organismal Systems	Immune system	11	101	0.00019087	0.00271036	http://www.kegg.jp/kegg-bin/show_pathway?map04620/K03156%09%23FFFFFF,red/K04433%09%23FFFFFF,green/K10160%09%23FFFFFF,red/K00922%09%23FFFFFF,red/K04734%09%23FFFFFF,red/K04379%09%23FFFFFF,red/K05405%09%23FFFFFF,red/K10169%09%23FFFFFF,red/K12499%09%23FFFFFF,red/K10030%09%23FFFFFF,red/K12672%09%23FFFFFF,red/
