# Supplementary material for: Discovering the Mechanisms of Oleodaphnone as a Potential HIV Latency-Reversing Agent by Transcriptome Profiling
Source: Int J Mol Sci. 2023 Apr 16;24(8):7357. doi: 10.3390/ijms24087357 (PMC10138910; doi:10.3390/ijms24087357)
Supplement: Supplementary file 1 [file ijms-24-07357-s001.zip]

Archive with 4 entries (4 files):
- Supporting Information.pdf
- Table S1 DEGs-review.xlsx
- Table S2 GO enrichment-review.xlsx
- Table S3 KEGG enrichment-review.xlsx
